# Supplementary material for: Quantifying wheat spike morphology by high resolution 3D surface scanning
Source: Research Square preprint supplement (doi:10.21203/rs.3.rs-8551193/v1), 2026-02-19
Supplement: Supplementary file 1 [file 5d3afe66b653b778b03fdfad.xlsx]

## Sheet: Correlation_Coefficients_R2
	ZAS_AUC	ZAS_ΔZ	ZAS_MT	ZAS_Slope	Base AUC	Base_Amplitude	Base_CV	Base_ET	Base_ΔZ	Base_MT	Base_RC	Base_Slope	Base_ST	Base_SD	Apex AUC	Apex_Amplitude	Apex_CV	Apex_ET	Apex_ΔZ	Apex_MT	Apex_RC	Apex_Slope	Apex_ST	Apex_SD	Apex_TI	Num_branch	Num-endpoints	Local_Maxima	Local_Minima	NLE	AUC_V/SL	W/SL	W/AUC_V	W/NSPS	NSPS/SL	AUC_V/NSPS	z-Length	SL	SG-max	SG-mean	SG-mode	SG-Amplitude	SG-loc	SG-scale	SG-Skewness	logN-max	logN-mean	logN-mode	logN-amplitude
ZAS_AUC	1	0.29	0.02	0.03	0.17	0.06	0.16	0.09	0.01	0.14	0.09	0.01	0.22	0.02	0.18	0.09	0.04	0.01	0	0.08	0.07	0	0.09	0.08	0.07	0.01	0	0.01	0.01	0.01	0.07	0.01	0.01	0.05	0	0.17	0.02	0.02	0.09	0.06	0.1	0.3	0.13	0	0.01	0.09	0.06	0.11	0.24
ZAS_ΔZ	0.29	1	0.4	0.4	0.02	0.09	0.02	0.1	0	0.06	0	0.08	0.07	0.14	0.02	0.1	0.04	0.01	0	0.07	0.03	0.13	0.1	0.1	0.03	0.22	0.21	0.07	0.09	0.08	0.13	0.17	0	0.09	0.05	0.07	0.07	0.04	0.09	0.15	0.27	0.02	0.36	0.01	0	0.09	0.15	0.33	0.02
ZAS_MT	0.02	0.4	1	0.75	0.24	0.45	0.02	0.53	0	0.47	0.03	0.26	0.66	0.44	0.24	0.53	0.2	0.01	0.05	0.44	0.27	0.39	0.53	0.49	0.27	0.36	0.43	0.14	0.17	0.15	0.54	0.53	0.03	0.39	0.2	0.39	0.13	0.09	0.48	0.57	0.13	0.37	0.07	0.1	0.02	0.48	0.57	0.21	0.3
ZAS_Slope	0.03	0.4	0.75	1	0.14	0.43	0	0.48	0.02	0.38	0	0.27	0.44	0.47	0.1	0.48	0.15	0.01	0.09	0.42	0.23	0.45	0.48	0.44	0.23	0.52	0.6	0.2	0.23	0.22	0.49	0.61	0.1	0.35	0.29	0.22	0.25	0.19	0.43	0.52	0.18	0.17	0.06	0.16	0.01	0.43	0.52	0.3	0.14
Base AUC	0.17	0.02	0.24	0.14	1	0.5	0.26	0.49	0.3	0.66	0.03	0	0.23	0.29	0.02	0.48	0.29	0	0.36	0.44	0.25	0.48	0.49	0.52	0.25	0.25	0.31	0.13	0.15	0.14	0.57	0.4	0	0.18	0.3	0.3	0.12	0.14	0.54	0.55	0.02	0.43	0.07	0.17	0.11	0.54	0.55	0	0.25
Base_Amplitude	0.06	0.09	0.45	0.43	0.5	1	0.01	0.98	0.01	0.94	0.11	0.43	0.47	0.91	0.18	0.98	0.39	0.02	0.35	0.95	0.66	0.79	0.98	0.97	0.66	0.69	0.77	0.39	0.42	0.41	0.96	0.87	0.06	0.46	0.64	0.44	0.48	0.44	0.98	0.96	0.09	0.45	0	0.45	0.04	0.98	0.96	0.22	0.3
Base_CV	0.16	0.02	0.02	0	0.26	0.01	1	0.01	0.34	0.08	0.13	0.11	0.05	0.02	0	0.01	0	0.01	0.04	0.01	0	0.01	0.01	0.01	0	0	0	0.01	0.01	0.01	0.03	0.01	0.02	0.03	0	0.08	0.02	0.01	0.02	0.03	0.14	0.09	0.02	0.01	0.13	0.02	0.03	0.09	0.05
Base_ET	0.09	0.1	0.53	0.48	0.49	0.98	0.01	1	0.02	0.95	0.05	0.46	0.61	0.9	0.25	1	0.38	0.02	0.29	0.95	0.67	0.74	1	0.96	0.67	0.65	0.74	0.34	0.37	0.36	0.97	0.86	0.06	0.51	0.58	0.51	0.42	0.37	0.98	0.97	0.1	0.53	0	0.4	0.03	0.99	0.97	0.22	0.37
Base_ΔZ	0.01	0	0	0.02	0.3	0.01	0.34	0.02	1	0	0	0.41	0.03	0.07	0.13	0.02	0	0.03	0.09	0.01	0.07	0	0.02	0.01	0.07	0.01	0.01	0.01	0.01	0.01	0	0.02	0.15	0.05	0	0	0.04	0.02	0.01	0	0.35	0.01	0.14	0.01	0.11	0.01	0	0.29	0
Base_MT	0.14	0.06	0.47	0.38	0.66	0.94	0.08	0.95	0	1	0.04	0.3	0.56	0.78	0.18	0.95	0.4	0.02	0.35	0.9	0.63	0.74	0.95	0.94	0.63	0.59	0.68	0.3	0.34	0.32	0.96	0.82	0.04	0.47	0.56	0.5	0.37	0.35	0.96	0.95	0.05	0.55	0	0.37	0.06	0.96	0.95	0.15	0.37
Base_RC	0.09	0	0.03	0	0.03	0.11	0.13	0.05	0	0.04	1	0.02	0.13	0.13	0.1	0.05	0.05	0.03	0.26	0.06	0.04	0.14	0.05	0.07	0.04	0.12	0.11	0.18	0.19	0.19	0.05	0.05	0	0.01	0.26	0.03	0.29	0.31	0.07	0.05	0	0.03	0.04	0.25	0.02	0.07	0.05	0.04	0.07
Base_Slope	0.01	0.08	0.26	0.27	0	0.43	0.11	0.46	0.41	0.3	0.02	1	0.36	0.59	0.34	0.46	0.13	0.03	0.02	0.45	0.4	0.24	0.46	0.4	0.4	0.32	0.33	0.16	0.17	0.16	0.37	0.4	0.09	0.32	0.23	0.24	0.24	0.18	0.4	0.39	0.34	0.17	0.08	0.17	0.03	0.41	0.39	0.35	0.16
Base_ST	0.22	0.07	0.66	0.44	0.23	0.47	0.05	0.61	0.03	0.56	0.13	0.36	1	0.44	0.51	0.61	0.18	0	0.02	0.54	0.42	0.27	0.61	0.52	0.42	0.23	0.3	0.06	0.07	0.07	0.55	0.46	0.03	0.5	0.13	0.59	0.07	0.04	0.54	0.57	0.09	0.6	0.03	0.08	0	0.54	0.57	0.12	0.55
Base_SD	0.02	0.14	0.44	0.47	0.29	0.91	0.02	0.9	0.07	0.78	0.13	0.59	0.44	1	0.21	0.9	0.34	0.03	0.27	0.88	0.63	0.71	0.9	0.87	0.63	0.69	0.75	0.38	0.42	0.4	0.85	0.79	0.06	0.41	0.62	0.37	0.5	0.44	0.89	0.86	0.19	0.36	0.01	0.43	0.01	0.89	0.87	0.33	0.25
Apex AUC	0.18	0.02	0.24	0.1	0.02	0.18	0	0.25	0.13	0.18	0.1	0.34	0.51	0.21	1	0.25	0.01	0.01	0.13	0.24	0.26	0	0.25	0.16	0.26	0.01	0.02	0.02	0.01	0.02	0.2	0.12	0	0.41	0	0.65	0.04	0.06	0.19	0.21	0.11	0.68	0.14	0.03	0.1	0.19	0.21	0.03	0.77
Apex_Amplitude	0.09	0.1	0.53	0.48	0.48	0.98	0.01	1	0.02	0.95	0.05	0.46	0.61	0.9	0.25	1	0.39	0.03	0.29	0.95	0.7	0.75	1	0.97	0.7	0.65	0.74	0.35	0.38	0.37	0.97	0.87	0.06	0.52	0.58	0.51	0.42	0.38	0.98	0.97	0.1	0.52	0	0.41	0.04	0.99	0.97	0.22	0.36
Apex_CV	0.04	0.04	0.2	0.15	0.29	0.39	0	0.38	0	0.4	0.05	0.13	0.18	0.34	0.01	0.39	1	0.15	0.14	0.24	0.35	0.4	0.38	0.48	0.35	0.24	0.3	0.23	0.25	0.24	0.35	0.39	0.13	0.18	0.33	0.1	0.22	0.21	0.38	0.33	0.09	0.08	0.02	0.4	0.02	0.39	0.34	0.19	0.03
Apex_ET	0.01	0.01	0.01	0.01	0	0.02	0.01	0.02	0.03	0.02	0.03	0.03	0	0.03	0.01	0.03	0.15	1	0.02	0.01	0.28	0.04	0.02	0.04	0.28	0.03	0.03	0.12	0.11	0.12	0.02	0.04	0.05	0.02	0.03	0	0.07	0.08	0.02	0.02	0.02	0.01	0	0.12	0.02	0.02	0.02	0.04	0.02
Apex_ΔZ	0	0	0.05	0.09	0.36	0.35	0.04	0.29	0.09	0.35	0.26	0.02	0.02	0.27	0.13	0.29	0.14	0.02	1	0.34	0.13	0.6	0.29	0.36	0.13	0.44	0.47	0.49	0.49	0.49	0.34	0.29	0	0.01	0.59	0	0.72	0.77	0.37	0.33	0.03	0	0.2	0.7	0.34	0.36	0.33	0.01	0.03
Apex_MT	0.08	0.07	0.44	0.42	0.44	0.95	0.01	0.95	0.01	0.9	0.06	0.45	0.54	0.88	0.24	0.95	0.24	0.01	0.34	1	0.61	0.71	0.95	0.91	0.61	0.66	0.73	0.34	0.37	0.35	0.95	0.81	0.03	0.45	0.59	0.48	0.45	0.41	0.96	0.95	0.05	0.51	0	0.39	0.05	0.96	0.95	0.16	0.34
Apex_RC	0.07	0.03	0.27	0.23	0.25	0.66	0	0.67	0.07	0.63	0.04	0.4	0.42	0.63	0.26	0.7	0.35	0.28	0.13	0.61	1	0.43	0.67	0.62	1	0.35	0.39	0.25	0.27	0.26	0.61	0.54	0.06	0.45	0.28	0.46	0.26	0.23	0.64	0.61	0.12	0.37	0	0.29	0.01	0.65	0.61	0.18	0.28
Apex_Slope	0	0.13	0.39	0.45	0.48	0.79	0.01	0.74	0	0.74	0.14	0.24	0.27	0.71	0	0.75	0.4	0.04	0.6	0.71	0.43	1	0.74	0.8	0.43	0.8	0.87	0.6	0.63	0.62	0.77	0.78	0.08	0.24	0.79	0.16	0.68	0.66	0.78	0.78	0.05	0.15	0.03	0.6	0.12	0.78	0.78	0.21	0.06
Apex_ST	0.09	0.1	0.53	0.48	0.49	0.98	0.01	1	0.02	0.95	0.05	0.46	0.61	0.9	0.25	1	0.38	0.02	0.29	0.95	0.67	0.74	1	0.96	0.67	0.65	0.74	0.34	0.37	0.36	0.97	0.86	0.06	0.51	0.58	0.51	0.42	0.37	0.98	0.97	0.1	0.53	0	0.4	0.03	0.99	0.97	0.22	0.37
Apex_SD	0.08	0.1	0.49	0.44	0.52	0.97	0.01	0.96	0.01	0.94	0.07	0.4	0.52	0.87	0.16	0.97	0.48	0.04	0.36	0.91	0.62	0.8	0.96	1	0.62	0.69	0.77	0.41	0.45	0.43	0.96	0.87	0.06	0.44	0.66	0.41	0.48	0.45	0.98	0.95	0.07	0.42	0	0.48	0.07	0.98	0.95	0.21	0.26
Apex_TI	0.07	0.03	0.27	0.23	0.25	0.66	0	0.67	0.07	0.63	0.04	0.4	0.42	0.63	0.26	0.7	0.35	0.28	0.13	0.61	1	0.43	0.67	0.62	1	0.35	0.39	0.25	0.27	0.26	0.61	0.54	0.06	0.45	0.28	0.46	0.26	0.23	0.64	0.61	0.12	0.37	0	0.29	0.01	0.65	0.61	0.18	0.28
Num_branch	0.01	0.22	0.36	0.52	0.25	0.69	0	0.65	0.01	0.59	0.12	0.32	0.23	0.69	0.01	0.65	0.24	0.03	0.44	0.66	0.35	0.8	0.65	0.69	0.35	1	0.96	0.51	0.54	0.53	0.68	0.77	0.11	0.25	0.72	0.13	0.65	0.61	0.67	0.7	0.11	0.1	0	0.47	0.07	0.67	0.7	0.29	0.04
Num-endpoints	0	0.21	0.43	0.6	0.31	0.77	0	0.74	0.01	0.68	0.11	0.33	0.3	0.75	0.02	0.74	0.3	0.03	0.47	0.73	0.39	0.87	0.74	0.77	0.39	0.96	1	0.53	0.56	0.55	0.76	0.85	0.12	0.3	0.74	0.17	0.68	0.63	0.76	0.78	0.12	0.13	0	0.54	0.08	0.76	0.78	0.32	0.06
Local_Maxima	0.01	0.07	0.14	0.2	0.13	0.39	0.01	0.34	0.01	0.3	0.18	0.16	0.06	0.38	0.02	0.35	0.23	0.12	0.49	0.34	0.25	0.6	0.34	0.41	0.25	0.51	0.53	1	0.98	1	0.35	0.39	0.06	0.07	0.54	0.02	0.65	0.63	0.37	0.35	0.02	0	0.04	0.54	0.09	0.37	0.35	0.12	0.01
Local_Minima	0.01	0.09	0.17	0.23	0.15	0.42	0.01	0.37	0.01	0.34	0.19	0.17	0.07	0.42	0.01	0.38	0.25	0.11	0.49	0.37	0.27	0.63	0.37	0.45	0.27	0.54	0.56	0.98	1	1	0.38	0.42	0.05	0.08	0.56	0.03	0.65	0.63	0.41	0.38	0.02	0.01	0.03	0.54	0.08	0.4	0.38	0.14	0
NLE	0.01	0.08	0.15	0.22	0.14	0.41	0.01	0.36	0.01	0.32	0.19	0.16	0.07	0.4	0.02	0.37	0.24	0.12	0.49	0.35	0.26	0.62	0.36	0.43	0.26	0.53	0.55	1	1	1	0.37	0.41	0.06	0.08	0.55	0.02	0.65	0.63	0.39	0.37	0.02	0	0.03	0.55	0.09	0.39	0.37	0.13	0
AUC_V/SL	0.07	0.13	0.54	0.49	0.57	0.96	0.03	0.97	0	0.96	0.05	0.37	0.55	0.85	0.2	0.97	0.35	0.02	0.34	0.95	0.61	0.77	0.97	0.96	0.61	0.68	0.76	0.35	0.38	0.37	1	0.89	0.04	0.5	0.6	0.51	0.42	0.4	0.98	0.99	0.07	0.53	0	0.38	0.06	0.98	0.99	0.18	0.35
W/SL	0.01	0.17	0.53	0.61	0.4	0.87	0.01	0.86	0.02	0.82	0.05	0.4	0.46	0.79	0.12	0.87	0.39	0.04	0.29	0.81	0.54	0.78	0.86	0.87	0.54	0.77	0.85	0.39	0.42	0.41	0.89	1	0.24	0.62	0.58	0.4	0.47	0.43	0.86	0.89	0.12	0.33	0	0.4	0.04	0.86	0.89	0.26	0.21
W/AUC_V	0.01	0	0.03	0.1	0	0.06	0.02	0.06	0.15	0.04	0	0.09	0.03	0.06	0	0.06	0.13	0.05	0	0.03	0.06	0.08	0.06	0.06	0.06	0.11	0.12	0.06	0.05	0.06	0.04	0.24	1	0.33	0.04	0.01	0.06	0.04	0.04	0.05	0.09	0	0	0.04	0.01	0.05	0.05	0.08	0
W/NSPS	0.05	0.09	0.39	0.35	0.18	0.46	0.03	0.51	0.05	0.47	0.01	0.32	0.5	0.41	0.41	0.52	0.18	0.02	0.01	0.45	0.45	0.24	0.51	0.44	0.45	0.25	0.3	0.07	0.08	0.08	0.5	0.62	0.33	1	0.05	0.74	0.06	0.04	0.46	0.5	0.1	0.49	0.06	0.05	0	0.46	0.5	0.09	0.44
NSPS/SL	0	0.05	0.2	0.29	0.3	0.64	0	0.58	0	0.56	0.26	0.23	0.13	0.62	0	0.58	0.33	0.03	0.59	0.59	0.28	0.79	0.58	0.66	0.28	0.72	0.74	0.54	0.56	0.55	0.6	0.58	0.04	0.05	1	0.02	0.74	0.74	0.63	0.59	0.05	0.05	0.04	0.65	0.12	0.63	0.59	0.24	0.01
AUC_V/NSPS	0.17	0.07	0.39	0.22	0.3	0.44	0.08	0.51	0	0.5	0.03	0.24	0.59	0.37	0.65	0.51	0.1	0	0	0.48	0.46	0.16	0.51	0.41	0.46	0.13	0.17	0.02	0.03	0.02	0.51	0.4	0.01	0.74	0.02	1	0.01	0	0.47	0.51	0.03	0.82	0.05	0.01	0	0.47	0.51	0.02	0.72
z-Length	0.02	0.07	0.13	0.25	0.12	0.48	0.02	0.42	0.04	0.37	0.29	0.24	0.07	0.5	0.04	0.42	0.22	0.07	0.72	0.45	0.26	0.68	0.42	0.48	0.26	0.65	0.68	0.65	0.65	0.65	0.42	0.47	0.06	0.06	0.74	0.01	1	0.98	0.46	0.42	0.05	0	0.03	0.83	0.17	0.46	0.42	0.25	0.02
SL	0.02	0.04	0.09	0.19	0.14	0.44	0.01	0.37	0.02	0.35	0.31	0.18	0.04	0.44	0.06	0.38	0.21	0.08	0.77	0.41	0.23	0.66	0.37	0.45	0.23	0.61	0.63	0.63	0.63	0.63	0.4	0.43	0.04	0.04	0.74	0	0.98	1	0.43	0.39	0.02	0	0.05	0.84	0.22	0.43	0.39	0.19	0.04
SG-max	0.09	0.09	0.48	0.43	0.54	0.98	0.02	0.98	0.01	0.96	0.07	0.4	0.54	0.89	0.19	0.98	0.38	0.02	0.37	0.96	0.64	0.78	0.98	0.98	0.64	0.67	0.76	0.37	0.41	0.39	0.98	0.86	0.04	0.46	0.63	0.47	0.46	0.43	1	0.98	0.07	0.49	0	0.45	0.06	1	0.98	0.19	0.31
SG-mean	0.06	0.15	0.57	0.52	0.55	0.96	0.03	0.97	0	0.95	0.05	0.39	0.57	0.86	0.21	0.97	0.33	0.02	0.33	0.95	0.61	0.78	0.97	0.95	0.61	0.7	0.78	0.35	0.38	0.37	0.99	0.89	0.05	0.5	0.59	0.51	0.42	0.39	0.98	1	0.08	0.52	0	0.38	0.05	0.98	1	0.2	0.35
SG-mode	0.1	0.27	0.13	0.18	0.02	0.09	0.14	0.1	0.35	0.05	0	0.34	0.09	0.19	0.11	0.1	0.09	0.02	0.03	0.05	0.12	0.05	0.1	0.07	0.12	0.11	0.12	0.02	0.02	0.02	0.07	0.12	0.09	0.1	0.05	0.03	0.05	0.02	0.07	0.08	1	0.02	0.48	0	0.24	0.07	0.08	0.84	0.06
SG-Amplitude	0.3	0.02	0.37	0.17	0.43	0.45	0.09	0.53	0.01	0.55	0.03	0.17	0.6	0.36	0.68	0.52	0.08	0.01	0	0.51	0.37	0.15	0.53	0.42	0.37	0.1	0.13	0	0.01	0	0.53	0.33	0	0.49	0.05	0.82	0	0	0.49	0.52	0.02	1	0.02	0	0.01	0.49	0.53	0.01	0.92
SG-loc	0.13	0.36	0.07	0.06	0.07	0	0.02	0	0.14	0	0.04	0.08	0.03	0.01	0.14	0	0.02	0	0.2	0	0	0.03	0	0	0	0	0	0.04	0.03	0.03	0	0	0	0.06	0.04	0.05	0.03	0.05	0	0	0.48	0.02	1	0.14	0.16	0	0	0.31	0.06
SG-scale	0	0.01	0.1	0.16	0.17	0.45	0.01	0.4	0.01	0.37	0.25	0.17	0.08	0.43	0.03	0.41	0.4	0.12	0.7	0.39	0.29	0.6	0.4	0.48	0.29	0.47	0.54	0.54	0.54	0.55	0.38	0.4	0.04	0.05	0.65	0.01	0.83	0.84	0.45	0.38	0	0	0.14	1	0.27	0.45	0.37	0.13	0.03
SG-Skewness	0.01	0	0.02	0.01	0.11	0.04	0.13	0.03	0.11	0.06	0.02	0.03	0	0.01	0.1	0.04	0.02	0.02	0.34	0.05	0.01	0.12	0.03	0.07	0.01	0.07	0.08	0.09	0.08	0.09	0.06	0.04	0.01	0	0.12	0	0.17	0.22	0.06	0.05	0.24	0.01	0.16	0.27	1	0.06	0.05	0.03	0.09
logN-max	0.09	0.09	0.48	0.43	0.54	0.98	0.02	0.99	0.01	0.96	0.07	0.41	0.54	0.89	0.19	0.99	0.39	0.02	0.36	0.96	0.65	0.78	0.99	0.98	0.65	0.67	0.76	0.37	0.4	0.39	0.98	0.86	0.05	0.46	0.63	0.47	0.46	0.43	1	0.98	0.07	0.49	0	0.45	0.06	1	0.98	0.19	0.32
logN-mean	0.06	0.15	0.57	0.52	0.55	0.96	0.03	0.97	0	0.95	0.05	0.39	0.57	0.87	0.21	0.97	0.34	0.02	0.33	0.95	0.61	0.78	0.97	0.95	0.61	0.7	0.78	0.35	0.38	0.37	0.99	0.89	0.05	0.5	0.59	0.51	0.42	0.39	0.98	1	0.08	0.53	0	0.37	0.05	0.98	1	0.2	0.36
logN-mode	0.11	0.33	0.21	0.3	0	0.22	0.09	0.22	0.29	0.15	0.04	0.35	0.12	0.33	0.03	0.22	0.19	0.04	0.01	0.16	0.18	0.21	0.22	0.21	0.18	0.29	0.32	0.12	0.14	0.13	0.18	0.26	0.08	0.09	0.24	0.02	0.25	0.19	0.19	0.2	0.84	0.01	0.31	0.13	0.03	0.19	0.2	1	0.02
logN-amplitude	0.24	0.02	0.3	0.14	0.25	0.3	0.05	0.37	0	0.37	0.07	0.16	0.55	0.25	0.77	0.36	0.03	0.02	0.03	0.34	0.28	0.06	0.37	0.26	0.28	0.04	0.06	0.01	0	0	0.35	0.21	0	0.44	0.01	0.72	0.02	0.04	0.31	0.35	0.06	0.92	0.06	0.03	0.09	0.32	0.36	0.02	1
logN-shape	0.01	0.03	0.15	0.14	0.37	0.31	0.05	0.28	0.16	0.31	0.09	0.01	0.06	0.22	0.03	0.28	0.17	0.02	0.64	0.32	0.09	0.48	0.28	0.37	0.09	0.36	0.38	0.37	0.38	0.37	0.35	0.29	0	0.04	0.38	0.05	0.39	0.43	0.35	0.34	0.13	0.04	0.25	0.52	0.4	0.34	0.34	0.01	0
logN-loc	0	0.03	0.04	0.01	0.06	0.02	0	0.02	0.02	0.02	0	0	0.01	0.02	0.03	0.02	0.12	0.01	0.06	0	0.02	0.18	0.02	0.03	0.02	0.04	0.04	0.1	0.1	0.1	0.02	0.03	0.01	0.01	0.04	0	0.05	0.05	0.02	0.02	0	0	0.09	0.05	0.01	0.02	0.02	0.01	0
logN-scale	0	0.03	0.04	0.01	0.06	0.02	0	0.02	0.02	0.02	0	0	0.01	0.02	0.03	0.02	0.12	0.01	0.06	0	0.02	0.18	0.02	0.03	0.02	0.04	0.04	0.1	0.1	0.1	0.02	0.03	0.01	0.01	0.04	0	0.05	0.05	0.02	0.02	0	0	0.09	0.05	0.01	0.02	0.02	0.01	0
gamma max	0.09	0.09	0.48	0.43	0.54	0.98	0.02	0.98	0.01	0.96	0.07	0.4	0.54	0.89	0.19	0.98	0.39	0.02	0.37	0.96	0.64	0.79	0.98	0.98	0.64	0.68	0.76	0.38	0.41	0.4	0.98	0.86	0.05	0.46	0.64	0.47	0.46	0.44	1	0.98	0.07	0.48	0	0.45	0.06	1	0.98	0.19	0.31
gamma mean	0.06	0.16	0.58	0.52	0.55	0.96	0.03	0.97	0	0.95	0.05	0.39	0.57	0.86	0.21	0.97	0.34	0.02	0.33	0.95	0.61	0.78	0.97	0.95	0.61	0.7	0.78	0.35	0.38	0.37	0.99	0.89	0.05	0.5	0.59	0.51	0.42	0.39	0.98	1	0.08	0.52	0	0.38	0.05	0.98	1	0.2	0.35
gamma mode	0.09	0.33	0.24	0.32	0	0.26	0.08	0.26	0.25	0.2	0.04	0.37	0.14	0.37	0.04	0.27	0.23	0.04	0.03	0.2	0.21	0.25	0.26	0.26	0.21	0.33	0.37	0.14	0.16	0.15	0.22	0.3	0.08	0.1	0.28	0.03	0.28	0.22	0.23	0.24	0.8	0.01	0.28	0.17	0.02	0.24	0.24	0.98	0.02
gamma amplitude	0.3	0.02	0.36	0.16	0.39	0.42	0.09	0.5	0	0.51	0.04	0.17	0.6	0.34	0.71	0.49	0.07	0.01	0	0.47	0.36	0.13	0.5	0.39	0.36	0.08	0.11	0	0	0	0.49	0.31	0	0.49	0.04	0.81	0	0	0.45	0.49	0.02	1	0.03	0	0.01	0.45	0.49	0.01	0.95
gamma loc	0.01	0.06	0.09	0.05	0.09	0.05	0	0.04	0.02	0.05	0	0	0.02	0.04	0.03	0.05	0.16	0.02	0.1	0.02	0.03	0.26	0.04	0.06	0.03	0.09	0.09	0.15	0.16	0.15	0.06	0.08	0.02	0.02	0.08	0	0.09	0.09	0.05	0.06	0	0	0.12	0.09	0.03	0.05	0.06	0.02	0
gamma scale	0	0.01	0.08	0.11	0.24	0.35	0	0.3	0.02	0.31	0.22	0.06	0.04	0.3	0.05	0.3	0.27	0.06	0.75	0.33	0.18	0.49	0.3	0.39	0.18	0.36	0.4	0.43	0.44	0.44	0.32	0.28	0	0.02	0.49	0.02	0.63	0.68	0.37	0.32	0.04	0	0.23	0.84	0.38	0.36	0.31	0.01	0.03
chi2 amplitude	0.29	0.02	0.36	0.16	0.39	0.42	0.09	0.5	0	0.51	0.04	0.18	0.6	0.34	0.72	0.49	0.07	0.01	0	0.47	0.36	0.13	0.5	0.39	0.36	0.08	0.11	0	0	0	0.49	0.31	0	0.49	0.04	0.81	0	0	0.45	0.49	0.03	1	0.03	0	0.02	0.45	0.49	0.01	0.95
chi2 df	0.01	0.03	0.05	0.02	0.06	0.02	0	0.02	0.02	0.03	0	0	0.01	0.02	0.03	0.02	0.13	0.02	0.06	0.01	0.02	0.19	0.02	0.03	0.02	0.04	0.05	0.1	0.11	0.1	0.03	0.04	0.01	0.01	0.05	0	0.05	0.05	0.02	0.03	0	0	0.09	0.05	0.01	0.02	0.03	0.02	0
chi2 loc	0.01	0.06	0.09	0.05	0.1	0.05	0	0.04	0.03	0.05	0	0	0.02	0.04	0.03	0.05	0.16	0.02	0.1	0.02	0.03	0.26	0.04	0.07	0.03	0.09	0.09	0.15	0.16	0.16	0.06	0.08	0.02	0.02	0.09	0	0.09	0.09	0.05	0.06	0	0	0.12	0.09	0.03	0.05	0.06	0.02	0
chi2 scale	0.01	0.01	0.08	0.11	0.25	0.35	0	0.3	0.03	0.31	0.2	0.05	0.05	0.29	0.05	0.3	0.26	0.05	0.76	0.33	0.16	0.49	0.3	0.39	0.16	0.36	0.41	0.43	0.45	0.44	0.33	0.29	0	0.02	0.49	0.02	0.63	0.68	0.37	0.32	0.05	0	0.24	0.82	0.4	0.36	0.32	0	0.03
W	0.15	0.06	0.46	0.37	0.34	0.61	0.04	0.67	0.02	0.65	0.01	0.33	0.62	0.52	0.51	0.67	0.26	0.01	0.01	0.59	0.49	0.31	0.67	0.59	0.49	0.27	0.34	0.06	0.07	0.06	0.65	0.68	0.24	0.86	0.13	0.73	0.05	0.03	0.61	0.65	0.1	0.71	0.03	0.05	0.01	0.61	0.65	0.09	0.64
NDSPS	0.07	0.06	0.22	0.11	0.33	0.2	0.04	0.21	0.06	0.25	0	0.02	0.16	0.15	0.15	0.21	0.11	0.01	0	0.18	0.07	0.11	0.21	0.21	0.07	0.08	0.09	0	0	0	0.25	0.12	0.04	0.01	0.17	0.09	0	0	0.21	0.24	0.03	0.37	0.01	0	0	0.21	0.24	0.03	0.34
NSPS	0.19	0.02	0.03	0	0.18	0.1	0	0.1	0.02	0.13	0.01	0.01	0.07	0.07	0.07	0.1	0.09	0.02	0	0.08	0.02	0.04	0.1	0.1	0.02	0.01	0.01	0	0	0	0.09	0.02	0.02	0.01	0.16	0	0.01	0.01	0.1	0.09	0	0.18	0.02	0	0.01	0.1	0.09	0	0.18
NBAS	0.09	0.54	0.29	0.26	0.08	0.07	0.09	0.08	0.05	0.08	0.03	0.01	0.08	0.05	0.06	0.08	0	0	0	0.07	0.04	0.07	0.08	0.08	0.04	0.14	0.12	0.01	0.02	0.01	0.14	0.13	0.01	0.15	0	0.23	0	0	0.07	0.14	0.04	0.12	0.19	0	0.01	0.07	0.14	0.05	0.09
V	0.31	0.03	0.41	0.2	0.46	0.52	0.08	0.6	0	0.61	0.02	0.2	0.65	0.42	0.67	0.59	0.15	0	0.01	0.55	0.44	0.19	0.6	0.5	0.44	0.12	0.17	0.01	0.02	0.01	0.59	0.39	0	0.52	0.07	0.83	0	0	0.55	0.58	0.03	0.98	0.01	0.01	0	0.56	0.58	0.02	0.88
AUC-V	0.32	0.03	0.41	0.2	0.46	0.52	0.08	0.6	0	0.61	0.02	0.2	0.65	0.42	0.67	0.59	0.15	0	0.01	0.55	0.44	0.19	0.6	0.5	0.44	0.12	0.17	0.01	0.02	0.01	0.59	0.39	0	0.52	0.08	0.83	0	0	0.55	0.58	0.03	0.98	0.01	0.01	0	0.56	0.58	0.02	0.88
[truncated: 19 more columns]

## Sheet: Correlation_Coefficients_r
	ZAS_AUC	ZAS_ΔZ	ZAS_MT	ZAS_Slope	Base AUC	Base_Amplitude	Base_CV	Base_ET	Base_ΔZ	Base_MT	Base_RC	Base_Slope	Base_ST	Base_SD	Apex AUC	Apex_Amplitude	Apex_CV	Apex_ET	Apex_ΔZ	Apex_MT	Apex_RC	Apex_Slope	Apex_ST	Apex_SD	Apex_TI	Num_branch	Num-endpoints	Local_Maxima	Local_Minima	NLE	AUC_V/SL	W/SL	W/AUC_V	W/NSPS	NSPS/SL	AUC_V/NSPS	z-Length	SL	SG-max	SG-mean	SG-mode	SG-Amplitude	SG-loc	SG-scale	SG-Skewness	logN-max	logN-mean	logN-mode	logN-amplitude
ZAS_AUC	1	0.536027	0.136119	-0.167401	0.41516	0.252257	-0.395721	0.304924	0.102153	0.375369	-0.292613	0.094802	0.464564	0.128322	0.422583	-0.30061	0.188166	0.0837619	-0.0255624	0.2891	-0.27372	-0.054897	0.304924	0.280709	0.27372	-0.117856	-0.0663113	0.0947775	0.0848282	0.0899831	0.264089	0.102268	-0.104048	0.225999	0.0196571	0.407932	0.152708	0.135504	0.302723	0.244119	0.310217	0.543836	0.356286	-0.0281918	-0.0849739	0.301794	0.243632	0.338513	0.493405
ZAS_ΔZ	0.536027	1	-0.634692	-0.630816	-0.12773	-0.304642	-0.128492	-0.312787	0.0154959	-0.250837	-0.0164183	-0.27499	-0.268141	-0.372137	-0.135855	0.314073	-0.206264	0.0878676	0.0659733	-0.27274	0.185633	0.359624	-0.312787	-0.319989	-0.185633	-0.473357	-0.462259	0.272928	0.307614	0.290993	-0.360276	-0.410887	-0.0691589	-0.297837	-0.234124	-0.261935	0.26467	0.208882	-0.294274	-0.390503	0.52034	-0.154728	0.600859	0.103635	-0.0382932	-0.296065	-0.391796	0.575359	-0.150239
ZAS_MT	0.136119	-0.634692	1	0.867442	0.491348	0.669297	-0.123398	0.729482	-0.0457721	0.685267	-0.181026	0.508669	0.812456	0.665302	0.484865	-0.728335	0.450919	-0.0787599	-0.218822	0.662353	-0.520183	-0.625226	0.729482	0.701221	0.520183	0.602976	0.658742	-0.372859	-0.410514	-0.392642	0.735071	0.729358	0.173481	0.620905	0.447401	0.627605	-0.354559	-0.29536	0.69155	0.757275	-0.359683	0.605604	-0.255432	-0.311403	-0.123052	0.69378	0.758196	-0.458468	0.550084
ZAS_Slope	-0.167401	-0.630816	0.867442	1	0.369351	0.656067	0.0175349	0.689639	-0.148888	0.620027	-0.00240871	0.518279	0.662126	0.686341	0.319004	-0.689913	0.381204	-0.115801	-0.300705	0.644866	-0.482558	-0.667789	0.689639	0.659834	0.482558	0.720109	0.772086	-0.45103	-0.474445	-0.463822	0.698526	0.779041	0.32329	0.589879	0.534399	0.471556	-0.496512	-0.43763	0.65395	0.722064	-0.422981	0.412878	-0.249261	-0.404147	-0.100726	0.657097	0.722814	-0.547727	0.369466
Base AUC	0.41516	-0.12773	0.491348	0.369351	1	0.707191	-0.513328	0.699406	0.544036	0.814179	0.161609	0.0399998	0.481484	0.542948	0.141206	-0.696282	0.537237	-0.0139206	-0.603748	0.665727	-0.499974	-0.693135	0.699406	0.722297	0.499974	0.495375	0.555346	-0.356592	-0.385921	-0.372149	0.755142	0.631828	-0.0316165	0.424724	0.551721	0.544697	-0.345411	-0.367672	0.734658	0.739148	0.133627	0.658396	0.273089	-0.406582	-0.326938	0.732496	0.738405	-0.00561706	0.497913
Base_Amplitude	0.252257	-0.304642	0.669297	0.656067	0.707191	1	-0.0896134	0.990539	-0.115751	0.968668	0.331246	0.657127	0.689013	0.955939	0.426398	-0.990537	0.626703	-0.154288	-0.594444	0.974141	-0.812253	-0.886611	0.990539	0.983128	0.812253	0.827805	0.877952	-0.622308	-0.651417	-0.638349	0.980949	0.931644	0.243552	0.679009	0.801556	0.664221	-0.692157	-0.666295	0.991588	0.980809	-0.302983	0.673372	0.0085526	-0.670181	-0.199854	0.992068	0.980769	-0.470273	0.545575
Base_CV	-0.395721	-0.128492	-0.123398	0.0175349	-0.513328	-0.0896134	1	-0.118665	-0.580473	-0.284365	0.360223	0.332709	-0.219656	0.131579	0.0140575	0.114743	0.0045952	-0.100872	0.208527	-0.119897	0.049849	0.102238	-0.118665	-0.122314	-0.049849	-0.0446308	-0.0521747	-0.0731069	-0.085612	-0.0795632	-0.182751	-0.108988	0.128446	-0.167692	0.0456556	-0.284056	-0.127813	-0.0827126	-0.1451	-0.169771	-0.377565	-0.307879	-0.125175	-0.0954049	0.359059	-0.141322	-0.167713	-0.305223	-0.224516
Base_ET	0.304924	-0.312787	0.729482	0.689639	0.699406	0.990539	-0.118665	1	-0.133587	0.97422	0.216111	0.678354	0.78195	0.94821	0.501419	-0.99947	0.618602	-0.139718	-0.539805	0.976929	-0.82118	-0.861568	1	0.981695	0.82118	0.803732	0.858373	-0.582167	-0.610784	-0.597871	0.983938	0.92933	0.241263	0.717258	0.758338	0.717288	-0.645592	-0.612236	0.991933	0.986425	-0.315995	0.725747	-0.0237878	-0.628857	-0.183501	0.992866	0.986504	-0.470078	0.609499
Base_ΔZ	0.102153	0.0154959	-0.0457721	-0.148888	0.544036	-0.115751	-0.580473	-0.133587	1	0.0202869	-0.0191716	-0.643388	-0.179736	-0.259463	-0.355289	0.139006	-0.0529521	0.185713	-0.30381	-0.120482	0.271512	-0.0157834	-0.133587	-0.0848553	-0.271512	-0.10229	-0.108949	0.10476	0.0896321	0.0973818	-0.0314102	-0.142222	-0.384012	-0.223076	-0.0671346	-0.0329228	0.198654	0.136097	-0.0750672	-0.0452281	0.594739	0.0822478	0.368705	0.12049	-0.331901	-0.0805869	-0.0463342	0.537499	-0.0286191
Base_MT	0.375369	-0.250837	0.685267	0.620027	0.814179	0.968668	-0.284365	0.97422	0.0202869	1	0.196202	0.549022	0.745145	0.882829	0.427493	-0.973666	0.631819	-0.134959	-0.593447	0.949625	-0.791094	-0.859017	0.97422	0.969234	0.791094	0.768048	0.826957	-0.552124	-0.578948	-0.566858	0.978594	0.906376	0.194547	0.684401	0.749108	0.708049	-0.609486	-0.593468	0.981556	0.97408	-0.232633	0.739629	0.0377404	-0.611204	-0.234755	0.981819	0.97388	-0.392163	0.605045
Base_RC	-0.292613	-0.0164183	-0.181026	-0.00240871	0.161609	0.331246	0.360223	0.216111	-0.0191716	0.196202	1	0.139345	-0.363286	0.360776	-0.311429	-0.220343	0.22241	-0.162477	-0.506041	0.248305	-0.208167	-0.375299	0.216111	0.261123	0.208167	0.347434	0.336596	-0.420961	-0.440567	-0.43177	0.224313	0.228207	0.0352891	-0.0997385	0.510152	-0.181572	-0.534263	-0.554704	0.260106	0.213866	-0.0669974	-0.16409	0.205403	-0.496955	-0.122975	0.25813	0.213383	-0.195569	-0.255391
Base_Slope	0.094802	-0.27499	0.508669	0.518279	0.0399998	0.657127	0.332709	0.678354	-0.643388	0.549022	0.139345	1	0.597708	0.766765	0.582942	-0.680135	0.35694	-0.159888	-0.129222	0.668544	-0.634057	-0.488564	0.678354	0.629304	0.634057	0.563611	0.577943	-0.398648	-0.409857	-0.405181	0.609584	0.629483	0.299267	0.569963	0.480903	0.487854	-0.485038	-0.428286	0.633541	0.622337	-0.580884	0.415026	-0.290935	-0.413194	0.163631	0.638073	0.624425	-0.592995	0.40391
Base_ST	0.464564	-0.268141	0.812456	0.662126	0.481484	0.689013	-0.219656	0.78195	-0.179736	0.745145	-0.363286	0.597708	1	0.665602	0.711311	-0.779164	0.420338	-0.0370614	-0.150711	0.734591	-0.647386	-0.522924	0.78195	0.718943	0.647386	0.48459	0.545381	-0.247875	-0.266784	-0.257945	0.740685	0.676244	0.167892	0.70378	0.364082	0.771107	-0.26556	-0.20687	0.734581	0.754458	-0.292618	0.774214	-0.164481	-0.277001	-0.0613195	0.737333	0.755056	-0.34649	0.740772
Base_SD	0.128322	-0.372137	0.665302	0.686341	0.542948	0.955939	0.131579	0.94821	-0.259463	0.882829	0.360776	0.766765	0.665602	1	0.457914	-0.948584	0.583117	-0.15912	-0.522624	0.937495	-0.795727	-0.84373	0.94821	0.93066	0.795727	0.828245	0.867243	-0.619466	-0.650064	-0.63625	0.922303	0.887722	0.248011	0.637022	0.788511	0.606932	-0.705919	-0.664042	0.941556	0.929332	-0.436197	0.600908	-0.0892799	-0.658147	-0.104785	0.943226	0.930054	-0.577523	0.504331
Apex AUC	0.422583	-0.135855	0.484865	0.319004	0.141206	0.426398	0.0140575	0.501419	-0.355289	0.427493	-0.311429	0.582942	0.711311	0.457914	1	-0.49638	0.109629	0.0751941	0.364794	0.487338	-0.50526	-0.0508838	0.501419	0.398444	0.50526	0.0954121	0.127883	0.148309	0.121476	0.135138	0.452241	0.353307	0.0450562	0.643793	-0.0543059	0.806794	0.190906	0.243672	0.437617	0.458396	-0.328517	0.825598	-0.374372	0.179249	0.315827	0.441512	0.460444	-0.182477	0.879983
Apex_Amplitude	-0.30061	0.314073	-0.728335	-0.689913	-0.696282	-0.990537	0.114743	-0.99947	0.139006	-0.973666	-0.220343	-0.680135	-0.779164	-0.948584	-0.49638	1	-0.628219	0.171864	0.541766	-0.974883	0.834416	0.863752	-0.99947	-0.983179	-0.834416	-0.8052	-0.859368	0.590389	0.618712	0.605963	-0.983392	-0.931389	-0.247206	-0.717766	-0.760559	-0.71387	0.651109	0.618266	-0.991673	-0.985408	0.318746	-0.718267	0.021687	0.636978	0.187719	-0.992678	-0.985506	0.473906	-0.601441
Apex_CV	0.188166	-0.206264	0.450919	0.381204	0.537237	0.626703	0.0045952	0.618602	-0.0529521	0.631819	0.22241	0.35694	0.420338	0.583117	0.109629	-0.628219	1	-0.389037	-0.378416	0.485495	-0.595271	-0.632572	0.618602	0.695702	0.595271	0.485251	0.546737	-0.479933	-0.504886	-0.493564	0.591982	0.620981	0.358363	0.422894	0.574415	0.308957	-0.46699	-0.457011	0.62008	0.578198	-0.299725	0.281463	0.14267	-0.6342	-0.156491	0.623034	0.578969	-0.438649	0.180053
Apex_ET	0.0837619	0.0878676	-0.0787599	-0.115801	-0.0139206	-0.154288	-0.100872	-0.139718	0.185713	-0.134959	-0.162477	-0.159888	-0.0370614	-0.15912	0.0751941	0.171864	-0.389037	1	0.143793	-0.0899803	0.530715	0.200713	-0.139718	-0.198129	-0.530715	-0.16994	-0.164067	0.340901	0.336446	0.339423	-0.136724	-0.207459	-0.218446	-0.127243	-0.18576	-0.00776974	0.268496	0.278913	-0.146676	-0.122777	0.132962	0.114506	-0.0602213	0.345128	0.15697	-0.148997	-0.123346	0.189735	0.150236
Apex_ΔZ	-0.0255624	0.0659733	-0.218822	-0.300705	-0.603748	-0.594444	0.208527	-0.539805	-0.30381	-0.593447	-0.506041	-0.129222	-0.150711	-0.522624	0.364794	0.541766	-0.378416	0.143793	1	-0.583789	0.363925	0.772593	-0.539805	-0.600936	-0.363925	-0.667047	-0.688057	0.701905	0.698371	0.701698	-0.58004	-0.54275	-0.0192821	-0.0999524	-0.770858	-0.0612925	0.846622	0.876526	-0.608289	-0.574356	-0.185898	-0.0442941	-0.450094	0.838142	0.582857	-0.602885	-0.572322	0.116758	0.161559
Apex_MT	0.2891	-0.27274	0.662353	0.644866	0.665727	0.974141	-0.119897	0.976929	-0.120482	0.949625	0.248305	0.668544	0.734591	0.937495	0.487338	-0.974883	0.485495	-0.0899803	-0.583789	1	-0.783148	-0.840782	0.976929	0.956345	0.783148	0.814987	0.854803	-0.58225	-0.604839	-0.59492	0.973683	0.901084	0.1854	0.671729	0.7657	0.695885	-0.667792	-0.643077	0.982286	0.975986	-0.234058	0.712078	0.00518155	-0.626967	-0.233279	0.981709	0.975722	-0.397302	0.581281
Apex_RC	-0.27372	0.185633	-0.520183	-0.482558	-0.499974	-0.812253	0.049849	-0.82118	0.271512	-0.791094	-0.208167	-0.634057	-0.647386	-0.795727	-0.50526	0.834416	-0.595271	0.530715	0.363925	-0.783148	1	0.655262	-0.82118	-0.789068	-1	-0.591589	-0.627117	0.502319	0.523073	0.513887	-0.780991	-0.736709	-0.240569	-0.673923	-0.532305	-0.676903	0.509916	0.477275	-0.801633	-0.778575	0.343083	-0.609259	0.0697863	0.537251	0.0857875	-0.804134	-0.77917	0.426945	-0.532075
Apex_Slope	-0.054897	0.359624	-0.625226	-0.667789	-0.693135	-0.886611	0.102238	-0.861568	-0.0157834	-0.859017	-0.375299	-0.488564	-0.522924	-0.84373	-0.0508838	0.863752	-0.632572	0.200713	0.772593	-0.840782	0.655262	1	-0.861568	-0.894212	-0.655262	-0.896042	-0.931581	0.775075	0.79253	0.785593	-0.878951	-0.884427	-0.27443	-0.491886	-0.889712	-0.393933	0.82601	0.812006	-0.883726	-0.881413	0.224762	-0.386241	-0.175537	0.775883	0.346784	-0.883225	-0.880766	0.457538	-0.238559
Apex_ST	0.304924	-0.312787	0.729482	0.689639	0.699406	0.990539	-0.118665	1	-0.133587	0.97422	0.216111	0.678354	0.78195	0.94821	0.501419	-0.99947	0.618602	-0.139718	-0.539805	0.976929	-0.82118	-0.861568	1	0.981695	0.82118	0.803732	0.858373	-0.582167	-0.610784	-0.597871	0.983938	0.92933	0.241263	0.717258	0.758338	0.717288	-0.645592	-0.612236	0.991933	0.986425	-0.315995	0.725747	-0.0237878	-0.628857	-0.183501	0.992866	0.986504	-0.470078	0.609499
Apex_SD	0.280709	-0.319989	0.701221	0.659834	0.722297	0.983128	-0.122314	0.981695	-0.0848553	0.969234	0.261123	0.629304	0.718943	0.93066	0.398444	-0.983179	0.695702	-0.198129	-0.600936	0.956345	-0.789068	-0.894212	0.981695	1	0.789068	0.828583	0.879382	-0.641873	-0.668725	-0.656822	0.979071	0.933819	0.253632	0.664569	0.810733	0.643257	-0.690227	-0.670334	0.989889	0.976289	-0.273726	0.649966	0.0431405	-0.69593	-0.255181	0.99013	0.976197	-0.456122	0.510594
Apex_TI	0.27372	-0.185633	0.520183	0.482558	0.499974	0.812253	-0.049849	0.82118	-0.271512	0.791094	0.208167	0.634057	0.647386	0.795727	0.50526	-0.834416	0.595271	-0.530715	-0.363925	0.783148	-1	-0.655262	0.82118	0.789068	1	0.591589	0.627117	-0.502319	-0.523073	-0.513887	0.780991	0.736709	0.240569	0.673923	0.532305	0.676903	-0.509916	-0.477275	0.801633	0.778575	-0.343083	0.609259	-0.0697863	-0.537251	-0.0857875	0.804134	0.77917	-0.426945	0.532075
Num_branch	-0.117856	-0.473357	0.602976	0.720109	0.495375	0.827805	-0.0446308	0.803732	-0.10229	0.768048	0.347434	0.563611	0.48459	0.828245	0.0954121	-0.8052	0.485251	-0.16994	-0.667047	0.814987	-0.591589	-0.896042	0.803732	0.828583	0.591589	1	0.978326	-0.715244	-0.732285	-0.725421	0.824985	0.877709	0.334827	0.50393	0.846663	0.360748	-0.804245	-0.779727	0.821337	0.834954	-0.32659	0.313902	-0.0514841	-0.689137	-0.271686	0.820982	0.834555	-0.539271	0.193493
Num-endpoints	-0.0663113	-0.462259	0.658742	0.772086	0.555346	0.877952	-0.0521747	0.858373	-0.108949	0.826957	0.336596	0.577943	0.545381	0.867243	0.127883	-0.859368	0.546737	-0.164067	-0.688057	0.854803	-0.627117	-0.931581	0.858373	0.879382	0.627117	0.978326	1	-0.727313	-0.74609	-0.73839	0.873685	0.921266	0.345204	0.550089	0.862875	0.410952	-0.82401	-0.796182	0.871382	0.883023	-0.342676	0.365072	-0.0306678	-0.731631	-0.286828	0.871409	0.88261	-0.565672	0.238188
Local_Maxima	0.0947775	0.272928	-0.372859	-0.45103	-0.356592	-0.622308	-0.0731069	-0.582167	0.10476	-0.552124	-0.420961	-0.398648	-0.247875	-0.619466	0.148309	0.590389	-0.479933	0.340901	0.701905	-0.58225	0.502319	0.775075	-0.582167	-0.641873	-0.502319	-0.715244	-0.727313	1	0.991076	0.997748	-0.588583	-0.626373	-0.242683	-0.26511	-0.734027	-0.129253	0.80745	0.796476	-0.611679	-0.589918	0.132088	-0.0459544	-0.194335	0.73618	0.297661	-0.609355	-0.588975	0.346684	0.0794728
Local_Minima	0.0848282	0.307614	-0.410514	-0.474445	-0.385921	-0.651417	-0.085612	-0.610784	0.0896321	-0.578948	-0.440567	-0.409857	-0.266784	-0.650064	0.121476	0.618712	-0.504886	0.336446	0.698371	-0.604839	0.523073	0.79253	-0.610784	-0.668725	-0.523073	-0.732285	-0.74609	0.991076	1	0.997785	-0.616968	-0.649019	-0.233403	-0.28558	-0.744991	-0.160363	0.805221	0.791969	-0.638617	-0.618539	0.156837	-0.079367	-0.176533	0.73776	0.290671	-0.636268	-0.617691	0.372069	0.0484677
NLE	0.0899831	0.290993	-0.392642	-0.463822	-0.372149	-0.638349	-0.0795632	-0.597871	0.0973818	-0.566858	-0.43177	-0.405181	-0.257945	-0.63625	0.135138	0.605963	-0.493564	0.339423	0.701698	-0.59492	0.513887	0.785593	-0.597871	-0.656822	-0.513887	-0.725421	-0.73839	0.997748	0.997785	1	-0.604184	-0.639171	-0.238556	-0.276004	-0.741187	-0.145197	0.808136	0.795991	-0.626603	-0.605641	0.144837	-0.0628708	-0.185812	0.738623	0.29481	-0.624262	-0.604743	0.360234	0.0640486
AUC_V/SL	0.264089	-0.360276	0.735071	0.698526	0.755142	0.980949	-0.182751	0.983938	-0.0314102	0.978594	0.224313	0.609584	0.740685	0.922303	0.452241	-0.983392	0.591982	-0.136724	-0.58004	0.973683	-0.780991	-0.878951	0.983938	0.979071	0.780991	0.824985	0.873685	-0.588583	-0.616968	-0.604184	1	0.941988	0.210777	0.705024	0.772239	0.716763	-0.647971	-0.629327	0.990124	0.997409	-0.260754	0.72726	-0.00954226	-0.616784	-0.242186	0.990086	0.997409	-0.423278	0.592644
W/SL	0.102268	-0.410887	0.729358	0.779041	0.631828	0.931644	-0.108988	0.92933	-0.142222	0.906376	0.228207	0.629483	0.676244	0.887722	0.353307	-0.931389	0.620981	-0.207459	-0.54275	0.901084	-0.736709	-0.884427	0.92933	0.933819	0.736709	0.877709	0.921266	-0.626373	-0.649019	-0.639171	0.941988	1	0.490794	0.784774	0.758654	0.628976	-0.687755	-0.659163	0.925808	0.943433	-0.349356	0.575285	-0.0556969	-0.630198	-0.199541	0.926869	0.94366	-0.505959	0.463138
W/AUC_V	-0.104048	-0.0691589	0.173481	0.32329	-0.0316165	0.243552	0.128446	0.241263	-0.384012	0.194547	0.0352891	0.299267	0.167892	0.248011	0.0450562	-0.247206	0.358363	-0.218446	-0.0192821	0.1854	-0.240569	-0.27443	0.241263	0.253632	0.240569	0.334827	0.345204	-0.242683	-0.233403	-0.238556	0.210777	0.490794	1	0.578274	0.193357	0.109119	-0.24792	-0.207869	0.211737	0.215702	-0.291646	-0.0179527	-0.0693768	-0.207436	0.0914909	0.214357	0.216262	-0.290273	0.00996372
W/NSPS	0.225999	-0.297837	0.620905	0.589879	0.424724	0.679009	-0.167692	0.717258	-0.223076	0.684401	-0.0997385	0.569963	0.70378	0.637022	0.643793	-0.717766	0.422894	-0.127243	-0.0999524	0.671729	-0.673923	-0.491886	0.717258	0.664569	0.673923	0.50393	0.550089	-0.26511	-0.28558	-0.276004	0.705024	0.784774	0.578274	1	0.222597	0.862167	-0.25013	-0.207219	0.675663	0.707533	-0.318376	0.697026	-0.237835	-0.220126	0.0550364	0.677774	0.708962	-0.295647	0.662704
NSPS/SL	0.0196571	-0.234124	0.447401	0.534399	0.551721	0.801556	0.0456556	0.758338	-0.0671346	0.749108	0.510152	0.480903	0.364082	0.788511	-0.0543059	-0.760559	0.574415	-0.18576	-0.770858	0.7657	-0.532305	-0.889712	0.758338	0.810733	0.532305	0.846663	0.862875	-0.734027	-0.744991	-0.741187	0.772239	0.758654	0.193357	0.222597	1	0.125862	-0.85876	-0.857366	0.795465	0.768561	-0.229195	0.223346	0.188096	-0.803941	-0.34069	0.794627	0.767559	-0.487669	0.0813739
AUC_V/NSPS	0.407932	-0.261935	0.627605	0.471556	0.544697	0.664221	-0.284056	0.717288	-0.0329228	0.708049	-0.181572	0.487854	0.771107	0.606932	0.806794	-0.71387	0.308957	-0.00776974	-0.0612925	0.695885	-0.676903	-0.393933	0.717288	0.643257	0.676903	0.360748	0.410952	-0.129253	-0.160363	-0.145197	0.716763	0.628976	0.109119	0.862167	0.125862	1	-0.0930782	-0.0649041	0.683967	0.714711	-0.182318	0.903708	-0.220396	-0.10259	0.0231497	0.68487	0.71607	-0.141936	0.851404
z-Length	0.152708	0.26467	-0.354559	-0.496512	-0.345411	-0.692157	-0.127813	-0.645592	0.198654	-0.609486	-0.534263	-0.485038	-0.26556	-0.705919	0.190906	0.651109	-0.46699	0.268496	0.846622	-0.667792	0.509916	0.82601	-0.645592	-0.690227	-0.509916	-0.804245	-0.82401	0.80745	0.805221	0.808136	-0.647971	-0.687755	-0.24792	-0.25013	-0.85876	-0.0930782	1	0.989806	-0.680322	-0.650981	0.215781	-0.00167	-0.158334	0.91253	0.406958	-0.678239	-0.649752	0.502077	0.144258
SL	0.135504	0.208882	-0.29536	-0.43763	-0.367672	-0.666295	-0.0827126	-0.612236	0.136097	-0.593468	-0.554704	-0.428286	-0.20687	-0.664042	0.243672	0.618266	-0.457011	0.278913	0.876526	-0.643077	0.477275	0.812006	-0.612236	-0.670334	-0.477275	-0.779727	-0.796182	0.796476	0.791969	0.795991	-0.629327	-0.659163	-0.207869	-0.207219	-0.857366	-0.0649041	0.989806	1	-0.659289	-0.624603	0.137855	0.0252453	-0.223285	0.919134	0.469255	-0.656383	-0.623256	0.431949	0.190291
SG-max	0.302723	-0.294274	0.69155	0.65395	0.734658	0.991588	-0.1451	0.991933	-0.0750672	0.981556	0.260106	0.633541	0.734581	0.941556	0.437617	-0.991673	0.62008	-0.146676	-0.608289	0.982286	-0.801633	-0.883726	0.991933	0.989889	0.801633	0.821337	0.871382	-0.611679	-0.638617	-0.626603	0.990124	0.925808	0.211737	0.675663	0.795465	0.683967	-0.680322	-0.659289	1	0.988905	-0.258972	0.697634	0.0281025	-0.670362	-0.251814	0.999893	0.988743	-0.4337	0.559491
SG-mean	0.244119	-0.390503	0.757275	0.722064	0.739148	0.980809	-0.169771	0.986425	-0.0452281	0.97408	0.213866	0.622337	0.754458	0.929332	0.458396	-0.985408	0.578198	-0.122777	-0.574356	0.975986	-0.778575	-0.881413	0.986425	0.976289	0.778575	0.834954	0.883023	-0.589918	-0.618539	-0.605641	0.997409	0.943433	0.215702	0.707533	0.768561	0.714711	-0.650981	-0.624603	0.988905	1	-0.280698	0.724206	-0.0356083	-0.613057	-0.23065	0.988997	0.999981	-0.444862	0.594388
SG-mode	0.310217	0.52034	-0.359683	-0.422981	0.133627	-0.302983	-0.377565	-0.315995	0.594739	-0.232633	-0.0669974	-0.580884	-0.292618	-0.436197	-0.328517	0.318746	-0.299725	0.132962	-0.185898	-0.234058	0.343083	0.224762	-0.315995	-0.273726	-0.343083	-0.32659	-0.342676	0.132088	0.156837	0.144837	-0.260754	-0.349356	-0.291646	-0.318376	-0.229195	-0.182318	0.215781	0.137855	-0.258972	-0.280698	1	-0.129965	0.692115	0.0584117	-0.494676	-0.268021	-0.283499	0.913906	-0.253626
SG-Amplitude	0.543836	-0.154728	0.605604	0.412878	0.658396	0.673372	-0.307879	0.725747	0.0822478	0.739629	-0.16409	0.415026	0.774214	0.600908	0.825598	-0.718267	0.281463	0.114506	-0.0442941	0.712078	-0.609259	-0.386241	0.725747	0.649966	0.609259	0.313902	0.365072	-0.0459544	-0.079367	-0.0628708	0.72726	0.575285	-0.0179527	0.697026	0.223346	0.903708	-0.00167	0.0252453	0.697634	0.724206	-0.129965	1	-0.133088	-0.0142677	0.0855658	0.698911	0.725265	-0.0777692	0.959609
SG-loc	0.356286	0.600859	-0.255432	-0.249261	0.273089	0.0085526	-0.125175	-0.0237878	0.368705	0.0377404	0.205403	-0.290935	-0.164481	-0.0892799	-0.374372	0.021687	0.14267	-0.0602213	-0.450094	0.00518155	0.0697863	-0.175537	-0.0237878	0.0431405	-0.0697863	-0.0514841	-0.0306678	-0.194335	-0.176533	-0.185812	-0.00954226	-0.0556969	-0.0693768	-0.237835	0.188096	-0.220396	-0.158334	-0.223285	0.0281025	-0.0356083	0.692115	-0.133088	1	-0.374542	-0.404982	0.0239654	-0.0373355	0.559838	-0.254528
SG-scale	-0.0281918	0.103635	-0.311403	-0.404147	-0.406582	-0.670181	-0.0954049	-0.628857	0.12049	-0.611204	-0.496955	-0.413194	-0.277001	-0.658147	0.179249	0.636978	-0.6342	0.345128	0.838142	-0.626967	0.537251	0.775883	-0.628857	-0.69593	-0.537251	-0.689137	-0.731631	0.73618	0.73776	0.738623	-0.616784	-0.630198	-0.207436	-0.220126	-0.803941	-0.10259	0.91253	0.919134	-0.670362	-0.613057	0.0584117	-0.0142677	-0.374542	1	0.521607	-0.668287	-0.611776	0.366553	0.168209
SG-Skewness	-0.0849739	-0.0382932	-0.123052	-0.100726	-0.326938	-0.199854	0.359059	-0.183501	-0.331901	-0.234755	-0.122975	0.163631	-0.0613195	-0.104785	0.315827	0.187719	-0.156491	0.15697	0.582857	-0.233279	0.0857875	0.346784	-0.183501	-0.255181	-0.0857875	-0.271686	-0.286828	0.297661	0.290671	0.29481	-0.242186	-0.199541	0.0914909	0.0550364	-0.34069	0.0231497	0.406958	0.469255	-0.251814	-0.23065	-0.494676	0.0855658	-0.404982	0.521607	1	-0.243367	-0.22714	-0.179691	0.295025
logN-max	0.301794	-0.296065	0.69378	0.657097	0.732496	0.992068	-0.141322	0.992866	-0.0805869	0.981819	0.25813	0.638073	0.737333	0.943226	0.441512	-0.992678	0.623034	-0.148997	-0.602885	0.981709	-0.804134	-0.883225	0.992866	0.99013	0.804134	0.820982	0.871409	-0.609355	-0.636268	-0.624262	0.990086	0.926869	0.214357	0.677774	0.794627	0.68487	-0.678239	-0.656383	0.999893	0.988997	-0.268021	0.698911	0.0239654	-0.668287	-0.243367	1	0.988876	-0.440584	0.563259
logN-mean	0.243632	-0.391796	0.758196	0.722814	0.738405	0.980769	-0.167713	0.986504	-0.0463342	0.97388	0.213383	0.624425	0.755056	0.930054	0.460444	-0.985506	0.578969	-0.123346	-0.572322	0.975722	-0.77917	-0.880766	0.986504	0.976197	0.77917	0.834555	0.88261	-0.588975	-0.617691	-0.604743	0.997409	0.94366	0.216262	0.708962	0.767559	0.71607	-0.649752	-0.623256	0.988743	0.999981	-0.283499	0.725265	-0.0373355	-0.611776	-0.22714	0.988876	1	-0.445942	0.595928
logN-mode	0.338513	0.575359	-0.458468	-0.547727	-0.00561706	-0.470273	-0.305223	-0.470078	0.537499	-0.392163	-0.195569	-0.592995	-0.34649	-0.577523	-0.182477	0.473906	-0.438649	0.189735	0.116758	-0.397302	0.426945	0.457538	-0.470078	-0.456122	-0.426945	-0.539271	-0.565672	0.346684	0.372069	0.360234	-0.423278	-0.505959	-0.290273	-0.295647	-0.487669	-0.141936	0.502077	0.431949	-0.4337	-0.444862	0.913906	-0.0777692	0.559838	0.366553	-0.179691	-0.440584	-0.445942	1	-0.12863
logN-amplitude	0.493405	-0.150239	0.550084	0.369466	0.497913	0.545575	-0.224516	0.609499	-0.0286191	0.605045	-0.255391	0.40391	0.740772	0.504331	0.879983	-0.601441	0.180053	0.150236	0.161559	0.581281	-0.532075	-0.238559	0.609499	0.510594	0.532075	0.193493	0.238188	0.0794728	0.0484677	0.0640486	0.592644	0.463138	0.00996372	0.662704	0.0813739	0.851404	0.144258	0.190291	0.559491	0.594388	-0.253626	0.959609	-0.254528	0.168209	0.295025	0.563259	0.595928	-0.12863	1
logN-shape	-0.108443	0.182201	-0.382476	-0.369833	-0.610905	-0.557879	0.226327	-0.525335	-0.393745	-0.560271	-0.298951	-0.118594	-0.240382	-0.468846	0.164813	0.52707	-0.416251	0.134666	0.802453	-0.565814	0.308189	0.690638	-0.525335	-0.608887	-0.308189	-0.597606	-0.616339	0.604544	0.615804	0.611563	-0.587732	-0.539789	-0.00130037	-0.202367	-0.618114	-0.217039	0.621031	0.659456	-0.591184	-0.582356	-0.365704	-0.189231	-0.500596	0.718901	0.635023	-0.583709	-0.581142	-0.106522	0.0569237
logN-loc	0.0705372	0.17849	-0.203152	-0.121482	-0.247416	-0.142907	0.029056	-0.137194	-0.12804	-0.150664	-0.0601257	0.0116495	-0.0754332	-0.139901	0.169808	0.140491	-0.35	0.1217	0.240096	-0.0689778	0.134825	0.423992	-0.137194	-0.170964	-0.134825	-0.200344	-0.202088	0.312203	0.316822	0.315226	-0.157797	-0.184715	-0.104331	-0.0834307	-0.210894	-0.0293114	0.218043	0.215977	-0.144311	-0.15699	0.0581132	0.000283589	-0.299661	0.214441	0.105663	-0.145263	-0.157087	0.11731	0.0289496
logN-scale	-0.070502	-0.177886	0.202285	0.120507	0.246582	0.141505	-0.0290873	0.13585	0.128231	0.149353	0.0593001	-0.0126187	0.0747015	0.138521	-0.169735	-0.139133	0.348829	-0.121068	-0.238528	0.0676054	-0.133667	-0.422552	0.13585	0.169511	0.133667	0.198909	0.20057	-0.310892	-0.31549	-0.313902	0.156442	0.183382	0.104089	0.0827828	0.209427	0.0287719	-0.216312	-0.214233	0.142881	0.15563	-0.0578802	-0.000539085	0.299493	-0.212562	-0.104484	0.14384	0.155729	-0.116486	-0.0287542
gamma max	0.299516	-0.29718	0.693804	0.657965	0.734718	0.991867	-0.143356	0.992016	-0.0748826	0.981449	0.260631	0.634505	0.733757	0.942063	0.434988	-0.991805	0.621425	-0.148155	-0.608799	0.981843	-0.80061	-0.886268	0.992016	0.990477	0.80061	0.823842	0.873913	-0.614107	-0.640957	-0.628993	0.990469	0.927751	0.214013	0.675753	0.797049	0.681992	-0.681479	-0.660346	0.999931	0.989336	-0.261722	0.695599	0.0292384	-0.671028	-0.248969	0.999911	0.9892	-0.435743	0.55789
gamma mean	0.241166	-0.393795	0.759022	0.72436	0.738446	0.980587	-0.167647	0.986164	-0.0451504	0.973444	0.214129	0.623255	0.754082	0.929748	0.457993	-0.985184	0.579234	-0.123871	-0.573763	0.975349	-0.7781	-0.881919	0.986164	0.976225	0.7781	0.835872	0.883812	-0.59053	-0.619257	-0.606307	0.997369	0.9441	0.216365	0.707914	0.768704	0.714459	-0.651162	-0.624726	0.988488	0.999974	-0.28273	0.723375	-0.0364062	-0.613034	-0.22855	0.988613	0.999986	-0.446129	0.593787
gamma mode	0.305598	0.573975	-0.486098	-0.564404	-0.0615094	-0.514658	-0.275764	-0.51386	0.504661	-0.442356	-0.205658	-0.612327	-0.376106	-0.61138	-0.193292	0.517503	-0.475853	0.190932	0.163493	-0.444867	0.454066	0.500775	-0.51386	-0.505898	-0.454066	-0.574483	-0.604415	0.372359	0.399487	0.386844	-0.47298	-0.546305	-0.287091	-0.318962	-0.528074	-0.175575	0.530306	0.465623	-0.48377	-0.492947	0.892262	-0.114621	0.530992	0.407963	-0.127017	-0.490141	-0.493995	0.991874	-0.145074
gamma amplitude	0.545161	-0.149068	0.598303	0.404019	0.627674	0.648386	-0.299554	0.704747	0.056066	0.716177	-0.193774	0.417132	0.776802	0.580547	0.845207	-0.697383	0.267359	0.114272	0.00390453	0.68645	-0.598784	-0.354572	0.704747	0.624451	0.598784	0.287187	0.33774	-0.0155871	-0.0482296	-0.032048	0.702257	0.554791	-0.00860342	0.696672	0.191501	0.900162	0.0332706	0.0633921	0.671913	0.699705	-0.157935	0.997797	-0.160035	0.0242703	0.122155	0.6738	0.700875	-0.0899015	0.974002
gamma loc	0.0877566	0.242817	-0.295936	-0.22638	-0.307056	-0.215644	0.0501163	-0.209739	-0.157264	-0.22148	-0.0705406	-0.0178841	-0.128171	-0.19662	0.184859	0.213688	-0.400965	0.152837	0.319679	-0.140727	0.165551	0.510786	-0.209739	-0.252653	-0.165551	-0.291578	-0.299536	0.388763	0.39473	0.392636	-0.23744	-0.276471	-0.133793	-0.123178	-0.291545	-0.0508139	0.296046	0.292663	-0.217265	-0.238698	0.0448855	-0.0158803	-0.348718	0.303092	0.159504	-0.218257	-0.238783	0.135992	0.0319114
gamma scale	-0.0541274	0.110502	-0.285399	-0.328805	-0.487482	-0.589454	0.0121966	-0.54605	-0.148749	-0.552787	-0.465952	-0.243132	-0.206362	-0.549836	0.21278	0.551077	-0.52302	0.238074	0.865519	-0.572989	0.419965	0.70036	-0.54605	-0.620682	-0.419965	-0.598362	-0.633925	0.655512	0.664643	0.661574	-0.566843	-0.530686	-0.0294128	-0.152904	-0.698791	-0.129351	0.796094	0.822381	-0.604767	-0.561653	-0.204809	-0.0560095	-0.47531	0.917722	0.613833	-0.599331	-0.560317	0.0986166	0.178466
chi2 amplitude	0.542689	-0.151521	0.598009	0.404011	0.626639	0.648557	-0.295425	0.704818	0.0542596	0.715741	-0.192243	0.418895	0.776402	0.58153	0.846136	-0.697522	0.269056	0.112191	0.00513807	0.686161	-0.600893	-0.354038	0.704818	0.624425	0.600893	0.286354	0.337193	-0.0147269	-0.0474339	-0.0312183	0.701903	0.554442	-0.00883947	0.696902	0.190736	0.900494	0.0336162	0.0640423	0.671785	0.699506	-0.161919	0.997615	-0.16263	0.0238394	0.125375	0.673756	0.700692	-0.0934761	0.974363
chi2 df	-0.0730781	-0.184235	0.21251	0.132176	0.252562	0.151032	-0.030372	0.145407	0.127064	0.158618	0.0609645	-0.0069568	0.0818987	0.146103	-0.170253	-0.148793	0.355394	-0.125699	-0.246611	0.0767439	-0.139621	-0.433704	0.145407	0.17967	0.139621	0.210134	0.212563	-0.319772	-0.324515	-0.322875	0.166412	0.195286	0.109461	0.0888485	0.21987	0.0317956	-0.226333	-0.223995	0.152154	0.165769	-0.0611	0.00171642	0.302973	-0.222575	-0.109158	0.15316	0.165871	-0.122659	-0.0281727
chi2 loc	0.0874371	0.244299	-0.299013	-0.229724	-0.30916	-0.21797	0.05177	-0.212105	-0.158602	-0.223873	-0.070256	-0.0185727	-0.130102	-0.198253	0.185135	0.21605	-0.401857	0.15311	0.322308	-0.143238	0.166031	0.513422	-0.212105	-0.255289	-0.166031	-0.29461	-0.302702	0.391155	0.39715	0.395047	-0.240131	-0.279473	-0.134695	-0.124619	-0.294005	-0.0517774	0.298377	0.295014	-0.219694	-0.241428	0.0433727	-0.0167546	-0.350578	0.305592	0.161933	-0.220664	-0.241509	0.135499	0.0317829
chi2 scale	-0.0774545	0.0929779	-0.290626	-0.329329	-0.496094	-0.588792	0.0458394	-0.546746	-0.161929	-0.55709	-0.448599	-0.232081	-0.213043	-0.542217	0.212196	0.551051	-0.505907	0.216217	0.8696	-0.57676	0.40318	0.702432	-0.546746	-0.621106	-0.40318	-0.603251	-0.636732	0.658411	0.667253	0.664334	-0.571161	-0.534457	-0.0319502	-0.15729	-0.699323	-0.134387	0.793639	0.822041	-0.606583	-0.5648	-0.23358	-0.0642767	-0.490358	0.907566	0.635304	-0.60048	-0.563356	0.0700166	0.173361
W	0.381935	-0.240485	0.680534	0.605086	0.585498	0.778042	-0.191901	0.818605	-0.145644	0.8037	-0.0723978	0.573073	0.789182	0.719077	0.71647	-0.816754	0.51164	-0.0712495	-0.11845	0.76509	-0.703422	-0.556936	0.818605	0.770001	0.703422	0.523453	0.580919	-0.237548	-0.266951	-0.252876	0.80359	0.823449	0.488438	0.929563	0.365869	0.854249	-0.221957	-0.179206	0.780405	0.803851	-0.318013	0.841021	-0.161589	-0.223861	0.0758412	0.783136	0.805139	-0.305201	0.802471
NDSPS	0.265852	-0.253266	0.469808	0.330879	0.573539	0.447887	-0.206044	0.462122	0.239706	0.502341	-0.0147132	0.140534	0.406158	0.389322	0.382238	-0.455732	0.325923	0.12245	-0.0141434	0.423431	-0.26382	-0.334545	0.462122	0.462622	0.26382	0.274625	0.293174	-0.000260615	-0.0323452	-0.0164064	0.496387	0.353417	-0.206429	0.121332	0.407781	0.303075	0.052583	0.0566957	0.459189	0.492315	-0.165856	0.607726	-0.0977742	0.0349123	0.0582938	0.461794	0.492638	-0.183755	0.581638
NSPS	0.438408	0.155019	0.179647	0.0530846	0.426775	0.313132	-0.0416264	0.318634	0.126555	0.355098	0.0816916	0.0895283	0.260458	0.272127	0.25828	-0.312392	0.298148	0.140292	-0.00877106	0.286234	-0.156671	-0.192017	0.318634	0.320708	0.156671	0.0750347	0.102193	0.0570424	0.0374156	0.0472937	0.302583	0.158001	-0.148352	-0.0965975	0.399923	0.0384956	0.0721444	0.0748481	0.318346	0.293989	-0.0559198	0.429125	0.144839	-0.00365524	0.106346	0.320932	0.293833	-0.0649492	0.425567
NBAS	0.292432	0.736583	-0.538144	-0.509192	-0.289198	-0.261549	0.301891	-0.27775	-0.212714	-0.286443	0.171641	-0.0975312	-0.278839	-0.227455	-0.239086	0.277163	-0.0657315	0.0254307	0.0102393	-0.264639	0.203295	0.269591	-0.27775	-0.274985	-0.203295	-0.367711	-0.353391	0.101594	0.125302	0.113751	-0.368679	-0.3643	0.113401	-0.392463	-0.0345694	-0.484358	0.0320151	0.0293091	-0.272913	-0.37649	0.203278	-0.347365	0.435028	-0.0701355	0.0822309	-0.273078	-0.377353	0.219906	-0.306106
V	0.56075	-0.165403	0.637517	0.44217	0.681002	0.72002	-0.288899	0.7714	0.0531106	0.783764	-0.139312	0.451261	0.803429	0.647453	0.820933	-0.765854	0.388314	0.0485302	-0.0777109	0.74198	-0.660519	-0.433202	0.7714	0.708132	0.660519	0.350366	0.409302	-0.0921601	-0.128661	-0.110734	0.766523	0.621195	0.0136749	0.719409	0.273398	0.910381	-0.0540123	-0.0280505	0.74461	0.761804	-0.158975	0.990548	-0.113773	-0.100282	0.0437638	0.746212	0.762873	-0.130397	0.93796
AUC-V	0.562093	-0.165034	0.638657	0.442594	0.680553	0.720305	-0.28927	0.771779	0.0515723	0.784098	-0.141118	0.452184	0.804137	0.647728	0.821334	-0.766255	0.389757	0.047811	-0.0770394	0.741941	-0.660737	-0.433477	0.771779	0.708826	0.660737	0.350892	0.409661	-0.0932482	-0.129744	-0.111822	0.7669	0.621716	0.0141771	0.719588	0.274311	0.910226	-0.0543433	-0.0285046	0.744974	0.762033	-0.159558	0.990195	-0.113886	-0.100692	0.0440275	0.746581	0.763108	-0.131217	0.937807
[truncated: 19 more columns]
