# Supplementary material for: Quantifying wheat spike morphology by high resolution 3D surface scanning
Source: Research Square preprint supplement (doi:10.21203/rs.3.rs-8551193/v1), 2026-02-19
Supplement: Supplementary file 2 [file c22c85b1fea426e3b3be4750.xlsx]

## Sheet: S6 All traits
order	Variety ID	GRU code	spike ID	original_ears_ID	ZAS_AUC	ZAS_ΔZ	ZAS_MT	ZAS_Slope	Base AUC	Base_Amplitude	Base_CV	Base_ET	Base_HalfChange_Length	Base_ΔZ	Base_MT	Base_RC (by the Start)	Base_Slope	Base_ST	Base_SD	Apex AUC	Apex_Amplitude	Apex_CV	Apex_ET	Apex_HalfChange_Length	Apex_ΔZ	Apex_MT	Apex_RC (by the Start)	Apex_Slope	Apex_ST	Apex_SD	Apex_Tapering_Index	Num_branch	Num-endpoints	NumLocalMaxima	NumLocalMinima	NLE (number of local extrema	AUC_V/SL	W/SL	W/AUC_V	W/NSPS	NSPS/SL	AUC_V/NSPS	z-length	SL	SG-max	SG-mean	SG-mode	SG-Amplitude	SG-loc
1	paragon	paragon	ear 1	ear 1	65.2878	16.065	4.34837	0.885998	1242.95	63.0604	0.352131	79.6448	6.24751	20.5275	60.0324	3.80239	3.07199	16.5844	21.1393	2582.63	-73.5785	0.369193	6.06628	33.0226	51.7651	49.7721	-0.923833	-1.42139	79.6448	18.3755	0.923833	391	137	17	16	33	0.0430794	0.0241834	0.561368	0.0995455	0.242938	177.327	87.274	90.558	78.0785	43.359	30.3451	4342.05	20.1892
2	paragon	paragon	ear 2	ear 2	69.8184	14.9042	5.03619	0.783574	1471.9	75.2686	0.320854	90.7164	4.58591	22.9296	63.6631	4.87244	3.2826	15.4478	20.4266	4333.42	-86.5938	0.397421	4.12261	48.1521	75.6676	57.1222	-0.954555	-1.1444	90.7164	22.7016	0.954555	402	119	15	14	29	0.0517824	0.0214904	0.415014	0.0938462	0.228996	226.128	111.079	113.539	88.0228	51.5515	38.9803	6475.21	21.336
3	paragon	paragon	ear 3	ear 3	118.599	16.4761	7.64534	1.25005	2231.08	80.2277	0.228604	104.878	3.29523	25.2634	87.3314	3.25464	3.17565	24.6502	19.9643	4348.09	-100.649	0.40644	4.22849	48.33	67.003	64.7271	-0.959682	-1.50216	104.878	26.3077	0.959682	431	140	21	20	41	0.0617186	0.0275216	0.445921	0.106786	0.257727	239.472	106.375	108.642	104.354	60.5554	26.3618	7441.97	18.4667
4	paragon	paragon	ear 4	ear 4	54.9501	9.0036	6.84578	1.98121	631.6	77.638	0.47846	100.087	7.0028	11.0044	57.7179	3.45847	7.05518	22.4487	27.6157	5035.31	-93.1943	0.342024	6.89238	60.024	79.0316	63.5849	-0.931136	-1.1792	100.087	21.7476	0.931136	397	145	21	20	41	0.0548118	0.024407	0.445287	0.102	0.239284	229.066	97.8589	104.478	90.5741	57.1315	24.0096	6521.89	13.1645
5	paragon	paragon	ear 5	ear 5	77.6918	12.3914	6.59699	1.18959	1929.7	83.5643	0.248468	101.785	1.90637	24.7827	77.2033	4.58631	3.37187	18.2204	19.1826	3396.42	-94.1385	0.387682	7.6461	40.0336	57.1909	59.3108	-0.92488	-1.64604	101.785	22.9937	0.92488	458	179	16	15	31	0.0532373	0.0253791	0.476716	0.0992308	0.255758	208.155	93.3334	101.659	92.4529	57.2687	31.455	6252.77	13.6995
6	paragon	paragon	ear 6	ear 6	66.879	7.45322	9.87629	3.18239	466.376	66.2121	0.359647	96.0761	6.62509	8.28136	56.9212	2.21712	7.99531	29.8639	20.4716	3702.4	-91.9555	0.372334	4.12057	46.3756	66.2509	55.8131	-0.957111	-1.38799	96.0761	20.7811	0.957111	432	171	16	15	31	0.0456212	0.0202131	0.443063	0.0783333	0.258039	176.799	80.2356	93.0091	80.9431	51.1605	19.8753	4757.35	9.59048
7	paragon	paragon	ear 7	ear 7	66.4678	3.84286	19.304	8.20814	537.864	73.1147	0.461266	116.22	6.72501	8.64643	63.9522	1.69617	8.45605	43.1057	29.499	5624.34	-109.955	0.353766	6.26573	57.6429	82.6215	67.9951	-0.946088	-1.33082	116.22	24.0544	0.946088	516	197	19	18	37	0.0574147	0.0302948	0.527649	0.1316	0.230204	249.408	94.0403	108.6	96.0772	65.0723	19.2143	7126.32	6.42874
8	paragon	paragon	ear 8	ear 8	68.6512	14.7987	5.17033	1.14275	2766.53	84.4137	0.251977	104.947	5.69183	34.151	80.4194	4.11103	2.47178	20.5335	20.2639	3684.58	-100.575	0.488147	4.3719	39.8428	63.7485	57.7437	-0.958342	-1.57769	104.947	28.1874	0.958342	371	136	19	18	37	0.0616354	0.0300139	0.486958	0.121923	0.246171	250.377	103.372	105.618	100.301	57.6688	33.0126	7188.83	19.4806
9	WAT-93	WATDE0227	ear 1	ear 1	19.63	6.18414	3.07116	0.756755	1208.75	38.9858	0.395945	43.6753	9.71794	38.8717	30.9422	8.31348	1.00293	4.68947	12.2514	1176.72	-38.5478	0.32184	5.12748	30.9207	42.4056	27.6808	-0.8826	-0.909027	43.6753	8.9088	0.8826	397	108	17	16	33	0.0272037	0.00946711	0.348008	0.042	0.225407	120.687	86.2945	88.7282	42.0652	27.3277	31.8042	2832.94	15.7598
10	WAT-93	WATDE0227	ear 2	ear 2	46.3595	11.347	4.1387	0.466593	838.386	43.5462	0.346064	51.0221	10.4741	25.3125	32.9924	5.82485	1.72034	7.47593	11.4175	1548.92	-46.3161	0.357037	4.70598	36.6594	49.7521	31.0764	-0.907766	-0.930938	51.0221	11.0954	0.907766	377	126	17	16	33	0.028528	0.0105029	0.368163	0.045	0.233399	122.229	84.4138	85.6903	45.8489	27.9945	35.7866	2740.9	19.0473
11	WAT-93	WATDE0227	ear 3	ear 3	69.2275	14.9959	4.65527	0.305538	923.082	38.1527	0.326324	45.7591	11.4674	31.756	29.0035	5.01594	1.20144	7.6063	9.46454	1231.55	-40.1905	0.333066	5.56852	30.8738	40.5771	30.2511	-0.878308	-0.990474	45.7591	10.0756	0.878308	344	106	16	15	31	0.0250747	0.00886572	0.353572	0.0395	0.224449	111.717	86.346	89.1072	41.816	25.3905	49.3982	2444.12	32.9234
12	WAT-93	WATDE0227	ear 4	ear 4	30.5673	8.12075	3.7836	0.524512	870.995	34.6344	0.319279	40.7232	8.12076	29.7761	29.0796	5.68826	1.16316	6.08876	9.28449	1468.87	-35.266	0.293708	5.45721	43.3107	51.4315	28.4654	-0.865993	-0.685689	40.7232	8.36054	0.865993	411	109	18	17	35	0.0266592	0.00811093	0.304245	0.0365	0.222217	119.969	88.0687	90.002	39.1943	26.423	35.1899	2848.08	15.6907
13	WAT-93	WATDE0227	ear 5	ear 5	37.0565	5.83628	6.56106	1.04598	659.296	52.8967	0.354673	63.7805	3.89086	15.5634	42.066	4.86014	3.39878	10.8838	14.9197	3097.06	-58.5876	0.37368	5.19286	51.5539	74.899	41.2618	-0.918582	-0.782222	63.7805	15.4187	0.918582	503	126	17	16	33	0.0390087	0.0150616	0.386108	0.0735	0.204919	190.361	94.8249	97.5994	60.7927	39.2644	27.236	4250.58	10.7376
14	WAT-93	WATDE0227	ear 6	ear 6	49.4162	9.81063	5.18924	0.652537	970.414	44.9187	0.311323	54.8312	8.82956	26.4887	36.4828	4.53152	1.69577	9.91249	11.3579	2149.47	-50.3249	0.30815	4.50623	52.9774	60.8259	35.2481	-0.917816	-0.82736	54.8312	10.8617	0.917816	512	101	18	17	35	0.0324197	0.0123514	0.380985	0.057619	0.214363	151.237	95.8998	97.9644	47.9803	32.4387	35.3183	3834.47	15.9432
15	WAT-93	WATDE0227	ear 7	ear 7	45.4736	9.77752	4.79713	0.68988	759.227	35.5865	0.310204	45.3656	7.11092	22.2216	33.9125	3.63904	1.60143	9.77908	10.5198	1696.99	-40.8378	0.312775	4.52774	47.9987	55.9985	30.2205	-0.900194	-0.729266	45.3656	9.45221	0.900194	364	110	16	15	31	0.028364	0.0105052	0.370371	0.0465	0.225919	125.55	85.9632	88.5274	43.4731	28.1709	28.4437	2924.6	14.0454
16	WAT-93	WATDE0227	ear 8	ear 8	45.4219	10.2444	4.83747	1.05836	518.064	41.0677	0.306435	55.3627	3.07332	13.3177	38.6096	2.87286	3.08369	14.295	11.8313	2768.79	-49.6128	0.32723	5.74989	59.4175	77.8574	35.4974	-0.896141	-0.637226	55.3627	11.6158	0.896141	385	110	16	16	32	0.0327537	0.0162656	0.496603	0.0691667	0.235165	139.28	98.0888	102.056	49.9691	32.6178	25.611	3870.27	12.6286
17	WAT-93	WATDE0227	ear 9	ear 9	72.3158	7.77323	9.37839	1.50335	1436.81	66.9665	0.38778	82.7893	5.82992	24.2913	58.7704	4.23225	2.7568	15.8229	22.79	3001.5	-78.2443	0.401267	4.54507	37.8945	64.1291	46.7571	-0.945101	-1.2201	82.7893	18.7621	0.945101	393	129	15	14	29	0.0440617	0.0161109	0.365643	0.0634615	0.253869	173.561	95.1726	102.415	76.1828	46.2307	23.3197	4959.52	12.4548
18	WAT-94	WATDE0228	ear 1	ear 1	42.2884	9.31653	4.6077	0.426786	730.898	34.3651	0.334793	41.7158	6.77566	25.4087	28.6291	4.6751	1.35249	7.35066	9.58481	1441.84	-34.4943	0.279573	7.22145	40.6539	49.1235	29.2685	-0.826889	-0.702196	41.7158	8.18268	0.826889	338	119	15	15	30	0.0262284	0.00825562	0.314759	0.0318182	0.259462	101.087	82.8203	84.7907	38.729	26.2889	33.8783	2729.51	15.5684
19	WAT-94	WATDE0228	ear 2	ear 2	42.6119	9.56367	4.46153	0.486078	1070.42	34.9639	0.304757	41.815	6.95539	33.9076	31.3879	5.10344	1.03115	6.85105	9.56567	1251.52	-37.5241	0.304578	4.29088	36.5158	42.6018	29.2508	-0.897384	-0.88081	41.815	8.90913	0.897384	377	94	17	16	33	0.0275325	0.00871619	0.316578	0.0340909	0.255675	107.686	85.0759	86.0468	41.0308	27.3342	35.6464	2855.66	16.911
20	WAT-94	WATDE0228	ear 3	ear 3	50.8166	6.57716	7.82677	1.15711	1748.15	36.6327	0.241857	48.8681	8.76955	44.9439	38.6975	2.994	0.815075	12.2354	9.35927	2074.51	-41.6546	0.292977	7.21352	44.9439	57.0021	36.2359	-0.852388	-0.730755	48.8681	10.6163	0.852388	325	68	18	17	35	0.0358057	0.0108872	0.304064	0.0491667	0.221435	161.698	107.302	108.384	49.0646	35.5509	42.7516	4808.89	15.3305
21	WAT-94	WATDE0228	ear 4	ear 4	31.9129	8.84862	3.64966	0.485177	970.612	34.0571	0.334652	40.3276	8.0442	32.1768	29.9975	5.43135	1.05844	6.27047	10.0387	996.027	-34.8823	0.323485	5.4453	32.1768	38.6122	25.7363	-0.864973	-0.903401	40.3276	8.3253	0.864973	353	90	15	14	29	0.0252931	0.00729304	0.288341	0.027619	0.264058	95.786	78.4834	79.5278	39.3931	24.9838	32.9812	2305.97	16.6985
22	WAT-94	WATDE0228	ear 5	ear 5	42.9925	5.8461	7.51877	1.52733	978.286	42.7986	0.327437	55.7702	9.74351	26.3075	37.0861	3.29941	1.62686	12.9716	12.1433	2501.35	-48.8065	0.324771	6.96368	45.7945	64.3071	38.7846	-0.875136	-0.75896	55.7702	12.5961	0.875136	253	85	17	16	33	0.0366788	0.0095545	0.260491	0.04	0.238863	153.556	95.3432	96.2897	53.2414	36.3727	36.051	4143.42	14.3932
23	WAT-94	WATDE0228	ear 6	ear 6	36.3404	7.45255	4.92413	0.580119	1247.31	38.5918	0.312172	46.0608	9.31569	37.2628	33.3099	5.16695	1.03567	7.46897	10.3984	1345.96	-40.1443	0.362935	5.9165	33.5365	47.51	28.2849	-0.87155	-0.844965	46.0608	10.2656	0.87155	382	63	18	17	35	0.0288373	0.00806342	0.279617	0.0321739	0.25062	115.064	91.0287	91.7725	44.0525	28.4278	37.2628	2973.65	17.1977
24	WAT-94	WATDE0228	ear 7	ear 7	40.3884	8.60273	4.76139	0.561635	764.541	33.7311	0.336236	41.5739	8.60274	26.6685	28.5446	4.30092	1.26483	7.84277	9.59771	1447.02	-35.8051	0.313409	5.76877	41.2931	49.8959	28.9105	-0.861241	-0.717597	41.5739	9.0608	0.861241	291	93	19	18	37	0.026474	0.00773885	0.292319	0.03	0.257962	102.628	84.1804	85.284	40.1999	26.3053	36.1315	2623.45	16.9766
25	WAT-94	WATDE0228	ear 8	ear 8	48.2283	8.54439	5.67865	0.630117	571.032	42.2003	0.324622	50.913	4.27219	15.3799	36.7434	4.84353	2.74386	8.71271	11.9277	2197.16	-46.3729	0.306859	4.54013	43.5764	60.6652	36.0999	-0.910826	-0.764407	50.913	11.0776	0.910826	355	96	17	17	34	0.0336411	0.0101247	0.300961	0.0386364	0.26205	128.377	81.8579	83.9534	49.5521	32.993	23.9243	3345.6	11.715
26	WAT-94	WATDE0228	ear 9	ear 9	39.8126	5.26185	7.65355	1.27384	1630.09	42.9829	0.273405	54.4243	9.47134	39.9901	40.5616	3.75679	1.07484	11.4414	11.0898	2223.3	-47.3282	0.297512	7.09611	41.0425	58.9328	37.6038	-0.869615	-0.803088	54.4243	11.1876	0.869615	395	96	18	17	35	0.0368409	0.0119861	0.325349	0.0529167	0.22651	162.646	103.046	105.956	51.4883	37.1925	34.7282	4843.08	12.2198
27	WAT-117	WATDE0253	ear 1	ear 1	40.9227	6.42284	6.35437	1.33613	1012.18	55.1302	0.301605	65.656	2.75264	21.1036	47.551	5.23763	2.61236	10.5258	14.3416	2504.23	-59.2964	0.375116	6.3596	40.3721	63.3108	39.5039	-0.903138	-0.936593	65.656	14.8185	0.903138	442	150	19	18	37	0.0365066	0.0210753	0.5773	0.103	0.204614	178.417	89.6912	97.745	60.0484	39.0194	24.7738	4023.51	10.052
28	WAT-117	WATDE0253	ear 2	ear 2	51.6905	10.8699	4.94764	0.871024	792.952	55.9333	0.358964	67.5374	7.6089	18.4788	42.7259	4.82015	3.0269	11.6041	15.3371	3092.43	-63.1462	0.399495	4.39124	48.9144	78.263	39.4647	-0.934981	-0.806846	67.5374	15.7659	0.934981	402	133	19	18	37	0.0361074	0.0218277	0.604521	0.108636	0.200924	179.707	106.292	109.494	59.9917	36.3892	31.5226	4365.92	15.9875
29	WAT-117	WATDE0253	ear 3	ear 3	55.1259	10.1535	5.61998	0.964219	964.628	45.4675	0.276138	58.081	4.61525	22.1532	43.2157	3.60469	2.05241	12.6134	11.9335	1998.43	-53.3513	0.410538	4.72966	31.3837	59.0752	33.7913	-0.918568	-0.903108	58.081	13.8726	0.918568	375	120	15	14	29	0.0333905	0.0191855	0.574577	0.087	0.220522	151.416	87.2854	90.6937	54.5908	32.8255	28.6145	3317.45	14.0631
30	WAT-117	WATDE0253	ear 4	ear 4	37.8442	7.39019	5.24668	0.870398	779.895	51.3248	0.293881	60.7942	3.6951	17.5517	43.969	5.4201	2.92421	9.46935	12.9217	2502.87	-56.0919	0.343883	4.70226	43.4174	66.5117	37.5637	-0.922653	-0.843339	60.7942	12.9175	0.922653	450	143	18	17	35	0.0353074	0.0212537	0.601962	0.105263	0.20191	174.867	90.4828	94.1012	54.7267	36.0257	20.323	3836.59	9.66119
31	WAT-117	WATDE0253	ear 5	ear 5	33.6663	6.17672	5.59017	1.20085	244.32	58.7876	0.715313	69.064	5.29433	7.94149	31.6555	5.72066	7.40259	10.2764	22.6436	3079.61	-63.9805	0.385602	5.08348	45.8842	73.2382	41.99	-0.926395	-0.873595	69.064	16.1914	0.926395	326	120	16	15	31	0.036601	0.0195148	0.533176	0.0895	0.218042	167.862	85.492	91.7253	61.3063	37.6479	15.883	3725.45	10.5322
32	WAT-117	WATDE0253	ear 6	ear 6	46.4201	7.78066	6.51527	1.99085	755.312	46.1374	0.264669	65.3404	6.91615	16.4258	45.7976	2.40261	2.80883	19.203	12.1212	2178.39	-59.4736	0.382568	5.86675	35.4452	61.3808	35.4913	-0.910212	-0.968929	65.3404	13.5779	0.910212	510	141	19	18	37	0.0332523	0.0188921	0.568144	0.085	0.22226	149.61	83.4857	89.9848	55.1195	34.5867	20.7484	3324.94	9.91549
33	WAT-117	WATDE0253	ear 7	ear 7	35.365	7.54673	4.74348	0.906947	336.095	46.82	0.455032	55.5018	7.54673	10.9008	30.9221	5.39287	4.29508	8.68182	14.0705	2367.08	-48.8683	0.364572	6.63349	51.1501	64.5665	36.5895	-0.880481	-0.756868	55.5018	13.3395	0.880481	306	126	16	15	31	0.0307522	0.0178392	0.580095	0.0836842	0.213172	144.259	82.0797	89.1297	52.6325	32.82	25.9943	3076.23	12.639
34	WAT-149	WATDE0020	ear 1	ear 1	96.7084	16.836	5.9187	0.721623	2037.12	69.5404	0.278874	84.6754	8.41798	31.8013	63.6535	4.59468	2.18672	15.135	17.7513	2567.95	-78.2763	0.322952	6.3991	36.4779	43.9606	58.1465	-0.924428	-1.7806	84.6754	18.7785	0.924428	487	157	18	17	35	0.0500549	0.0227945	0.45539	0.0792593	0.287594	174.047	91.5251	93.8823	81.9395	50.4629	42.0899	5627.37	23.5673
35	WAT-149	WATDE0020	ear 2	ear 2	55.6998	12.513	4.58744	0.800658	2069.14	75.9308	0.321464	87.5691	8.34202	31.6997	64.8715	6.52422	2.39532	11.6383	20.8539	2671.04	-80.3823	0.297312	7.1868	34.2023	38.3733	69.1337	-0.91793	-2.09475	87.5691	20.5542	0.91793	600	175	17	17	34	0.0574612	0.0238024	0.414234	0.0796	0.299025	192.162	81.356	83.605	89.8738	58.0717	41.7101	5950.94	22.3688
36	WAT-149	WATDE0020	ear 3	ear 3	59.2125	16.6776	3.70959	0.60981	1271.45	62.6452	0.33199	74.4641	7.89992	23.6997	53.2731	5.30042	2.64329	11.8189	17.6861	2685.71	-69.1207	0.296781	5.34344	41.2551	46.5217	57.4001	-0.928241	-1.48577	74.4641	17.0352	0.928241	376	134	18	18	36	0.0462516	0.0196772	0.425439	0.0657692	0.299185	154.592	85.8924	86.9026	75.1423	45.99	40.3773	4955.44	23.7435
37	WAT-149	WATDE0020	ear 4	ear 4	67.7319	19.2551	3.71144	0.808045	999.765	80.9826	0.318901	98.0948	3.98382	14.6073	67.9714	4.73247	5.54397	17.1121	21.6761	2138.93	-92.3043	0.338962	5.79047	25.8948	31.8705	66.8036	-0.940971	-2.89623	98.0948	22.6439	0.940971	583	231	14	14	28	0.0473006	0.0246065	0.520216	0.0759091	0.324158	145.918	65.0144	67.8682	93.0569	48.3824	33.8624	3750.44	23.259
38	WAT-149	WATDE0020	ear 5	ear 5	58.945	13.0742	4.69658	1.11027	1960.9	95.4894	0.326684	110.829	6.53709	24.6957	78.9365	6.22489	3.86664	15.3399	25.7873	2925.82	-103.607	0.288935	7.22227	31.2328	34.1381	85.1494	-0.934834	-3.03494	110.829	24.6026	0.934834	724	254	18	17	35	0.0652978	0.0323147	0.494883	0.102083	0.316553	206.278	71.0987	75.8168	108.954	68.5888	35.5908	6302.96	19.9494
39	WAT-149	WATDE0020	ear 6	ear 6	54.443	18.3846	3.03673	0.426928	655.362	64.6229	0.442067	73.6197	7.49003	14.98	43.6429	7.18285	4.31393	8.99684	19.2931	1920.19	-68.7468	0.297201	4.8729	30.641	34.0456	56.0641	-0.93381	-2.01926	73.6197	16.6623	0.93381	580	162	13	12	25	0.0386199	0.0148047	0.383343	0.0459091	0.322478	119.76	66.6515	68.2217	74.3091	38.7397	38.8119	3028.62	26.3094
40	WAT-149	WATDE0020	ear 7	ear 7	69.7599	18.0728	3.92149	0.469067	1076.11	68.2989	0.375324	78.1826	5.16365	18.7182	57.0414	6.91029	3.64879	9.88366	21.409	1448.33	-71.8482	0.337714	6.33438	21.9455	27.1092	53.1661	-0.91898	-2.65033	78.1826	17.9549	0.91898	590	196	13	12	25	0.0397032	0.0189541	0.477396	0.0590476	0.320997	123.687	63.2219	65.4211	78.6936	39.9439	33.5637	2960.16	23.3119
41	WAT-156	WATDE0296	ear 1	ear 2	77.2735	8.20457	9.82015	2.25303	1601.97	100.351	0.29159	123.432	4.10229	18.0501	88.0779	4.34783	5.55959	23.0807	25.6826	4091.54	-119.11	0.479325	4.32116	35.2797	54.9706	74.2761	-0.964991	-2.1668	123.432	35.6024	0.964991	505	179	16	15	31	0.0709657	0.0368816	0.51971	0.142857	0.258171	274.879	79.3474	81.3415	122.219	71.177	27.8955	6225.08	13.6798
42	WAT-156	WATDE0296	ear 2	ear 3	64.6138	15.2514	4.39429	0.669526	1298.47	58.3122	0.271237	70.4931	4.4857	23.3256	55.1362	4.78719	2.49992	12.1809	14.955	2108.33	-63.1742	0.391089	7.31887	35.8856	50.2398	41.9116	-0.896176	-1.25745	70.4931	16.3911	0.896176	486	146	17	16	33	0.0387797	0.0223593	0.576572	0.105789	0.211356	183.48	87.5985	89.8956	67.3269	38.6131	28.7085	3897.54	18.2413
43	WAT-156	WATDE0296	ear 3	ear 4	60.3722	11.9436	5.2816	1.01012	1686.64	84.3613	0.309525	99.0778	3.18497	22.2948	75.0052	5.73246	3.7839	14.7164	23.216	2758.68	-93.5371	0.409658	5.54073	29.461	44.5896	61.7006	-0.944077	-2.09773	99.0778	25.2761	0.944077	554	219	17	16	33	0.0566453	0.0313687	0.553774	0.119048	0.263497	214.975	77.6216	79.6973	99.2749	56.9582	30.2572	4976.14	17.2241
44	WAT-156	WATDE0296	ear 4	ear 5	49.2824	9.65763	5.29849	1.11358	1358.46	79.0236	0.285658	92.2413	3.71447	19.3152	69.6789	5.97863	4.09126	13.2177	19.9043	2661.22	-86.8877	0.36231	5.35365	36.4018	44.5736	59.525	-0.94196	-1.94931	92.2413	21.5665	0.94196	453	171	17	16	33	0.0552599	0.0317023	0.573694	0.117	0.27096	203.941	72.5652	73.8117	88.8915	54.9862	23.7726	4697.15	12.9849
45	WAT-156	WATDE0296	ear 5	ear 6	42.258	4.75967	9.17153	2.72484	1767.11	91.5605	0.375655	108.976	11.8992	24.5917	71.5876	5.25748	3.72323	17.4153	26.8922	3435.26	-103.817	0.392411	5.15837	37.2841	49.1833	69.6432	-0.952665	-2.11083	108.976	27.3287	0.952665	508	184	17	16	33	0.0655294	0.0345648	0.52747	0.131905	0.262043	250.071	77.5984	80.1394	105.292	66.5641	30.9379	5829.59	14.0969
46	WAT-156	WATDE0296	ear 6	ear 7	73.8791	8.87556	8.76582	1.9928	315.078	77.6584	0.458046	99.2452	2.95852	4.93087	63.3186	3.59748	15.7494	21.5869	29.0029	5192.14	-94.0071	0.370732	5.23818	60.1566	83.8248	61.8277	-0.94722	-1.12147	99.2452	22.9215	0.94722	490	141	18	17	35	0.0561438	0.0334328	0.595486	0.158571	0.210838	266.289	96.5324	99.6027	87.9067	56.3383	14.7926	6354.32	10.1997
47	WAT-156	WATDE0296	ear 7	ear 8	61.2014	8.42415	7.84225	2.51339	1035.48	78.991	0.36546	103.192	10.9514	16.8483	61.5654	3.2639	4.68836	24.2014	22.4997	4108.47	-96.4476	0.348471	6.74484	48.8601	58.1267	70.4568	-0.934638	-1.65927	103.192	24.5521	0.934638	555	211	15	14	29	0.0613791	0.0305208	0.497251	0.1295	0.235682	260.432	82.3469	84.8601	97.7504	62.1051	31.1694	5970.8	15.4065
48	WAT-156	WATDE0296	ear 8	ear 9	46.0152	9.96082	4.85301	0.972131	1604.79	78.7596	0.375192	91.2549	4.9804	24.072	66.1734	6.30314	3.27184	12.4953	24.8277	2561.28	-86.4309	0.441774	4.82396	34.0328	48.1439	53.1131	-0.947138	-1.79526	91.2549	23.464	0.947138	519	195	16	15	31	0.0506329	0.0275435	0.543984	0.109524	0.251484	201.336	80.1589	83.5044	86.3115	50.6264	21.5818	4726.5	14.1408
49	WAT-176	WATDE0323	ear 1	ear 1	39.9523	4.36806	9.40022	3.12689	1870.55	117.702	0.304695	135.962	3.27605	18.0183	103.029	6.44613	6.5324	18.2594	31.3924	2899.47	-132.264	0.404613	3.698	25.1164	31.6684	91.1887	-0.972801	-4.17652	135.962	36.8961	0.972801	1213	424	13	12	25	0.0863929	0.0538066	0.622813	0.125	0.430453	200.702	53.1084	55.7552	139.479	89.0445	20.7483	5421.15	9.34273
51	WAT-176	WATDE0323	ear 2	ear 3	39.2588	3.38341	11.6746	3.65582	2861.46	106.219	0.335329	124.578	7.25016	30.934	92.1786	5.78586	3.43373	18.3584	30.9101	877.197	-120.586	0.58684	3.9917	7.7335	13.5336	64.7978	-0.967958	-8.91009	124.578	38.0259	0.967958	1233	444	7	6	13	0.0767737	0.0479188	0.624156	0.107273	0.4467	171.868	46.7667	49.25	126.72	79.171	25.6172	4081.11	30.5271
52	WAT-176	WATDE0323	ear 3	ear 4	41.4106	3.14595	13.1739	5.31178	1750.13	146.416	0.402662	168.02	7.19074	16.1792	107.811	6.77709	9.04964	21.6045	43.4114	2632.47	-163.807	0.504053	4.21359	17.9769	25.1676	104.273	-0.974922	-6.50863	168.02	52.5593	0.974922	1716	613	8	7	15	0.0938899	0.0626967	0.667768	0.140952	0.444807	211.08	42.8736	47.2114	167.653	99.8282	21.5722	4705.98	14.7698
53	WAT-176	WATDE0323	ear 4	ear 5	23.74	1.45174	16.0553	11.751	2869.03	145.488	0.346743	169.18	5.32304	23.2278	122.964	6.1407	6.26351	23.6924	42.6369	2432.77	-164.072	0.447494	5.10802	16.4531	23.2278	104.376	-0.969807	-7.0636	169.18	46.7077	0.969807	1430	620	11	10	21	0.104738	0.0713345	0.681073	0.157826	0.451982	231.732	47.2682	50.887	170.202	111.016	22.7439	5827.99	14.7443
54	WAT-176	WATDE0323	ear 5	ear 6	38.9258	2.81268	14.421	7.1795	2342.19	135.157	0.278455	163.164	3.75024	19.6887	118.417	4.82581	6.8647	28.0072	32.9738	2453.37	-159.157	0.470415	4.00708	17.3448	23.9078	102.252	-0.975441	-6.65714	163.164	48.1011	0.975441	1536	581	10	9	19	0.0995159	0.0665616	0.668854	0.135	0.493049	201.838	45.1737	48.6767	160.033	104.341	22.5014	5294.47	20.5785
55	WAT-176	WATDE0323	ear 6	ear 7	20.3907	1.74963	11.605	9.29025	1728.66	130.094	0.402456	149.629	6.12372	17.4963	98.4547	6.65948	7.4355	19.5351	39.6237	2346.69	-145.56	0.444993	4.06915	18.3711	24.0575	97.1758	-0.972805	-6.05051	149.629	43.2425	0.972805	1751	649	9	8	17	0.0922078	0.0620703	0.673157	0.125455	0.494763	186.368	42.1738	44.4657	150.279	94.6301	20.9956	4430.42	13.1108
56	WAT-176	WATDE0323	ear 7	ear 8	32.5057	3.32486	9.99596	4.3164	1352.65	112.642	0.381971	131.569	3.74046	14.1306	95.1393	5.95145	7.97151	18.9269	36.3405	2046.04	-127.427	0.475523	4.14276	17.0399	23.6896	86.0495	-0.968513	-5.37901	131.569	40.9185	0.968513	1674	609	8	7	15	0.083151	0.0555252	0.667763	0.115	0.482828	172.217	39.3882	41.4226	139.485	83.8051	17.8711	3721.72	9.41617
57	WAT-176	WATDE0323	ear 8	ear 9	23.5487	3.06373	8.15163	4.49915	1498.26	121.097	0.432825	139.398	5.68977	16.194	92.1598	6.61689	7.47792	18.3012	39.8891	2294.29	-133.795	0.417799	5.6035	18.82	24.0721	94.9019	-0.959802	-5.55808	139.398	39.6499	0.959802	1861	565	12	11	23	0.0814956	0.0524386	0.643453	0.1025	0.511596	159.297	42.3281	46.912	143.767	88.2736	20.5707	4182.41	11.3004
58	WAT-196	WATDE0347	ear 1	ear 1	65.9575	7.84741	8.46592	1.51335	3089.95	106.597	0.287472	121.732	5.23161	32.0436	95.8696	7.04317	3.32663	15.1348	27.5599	1627.59	-115.575	0.499756	6.15682	15.6948	24.8502	65.4565	-0.949423	-4.65089	121.732	32.7123	0.949423	800	296	13	12	25	0.0720896	0.0337186	0.467732	0.0772414	0.436535	165.14	64.0334	66.4322	124.203	73.9273	26.1581	5313.02	14.1039
59	WAT-196	WATDE0347	ear 2	ear 2	87.9533	10.9212	8.25461	1.42664	3205.01	117.996	0.267993	137.058	3.64039	28.3951	112.002	6.19008	4.1555	19.062	30.0157	2798.63	-132.531	0.501016	4.52669	21.8424	32.7635	85.1011	-0.966972	-4.04507	137.058	42.637	0.966972	780	302	16	15	31	0.0831047	0.0429315	0.516595	0.105	0.408871	203.254	71.2448	73.3727	146.15	85.1343	32.7635	6668.93	18.5286
60	WAT-196	WATDE0347	ear 3	ear 3	121.902	12.2806	10.4288	2.19934	3066.57	119.72	0.256199	152.194	4.33433	26.006	117.226	3.68673	4.60357	32.4733	30.0333	3206.18	-148.12	0.488258	4.07395	22.394	33.2298	96.0945	-0.973232	-4.45743	152.194	46.9189	0.973232	812	311	12	11	23	0.0887975	0.0434111	0.488877	0.107931	0.402211	220.773	70.0201	72.1014	157.563	90.1174	37.5641	6809.54	26.2709
61	WAT-196	WATDE0347	ear 4	ear 4	92.3565	12.8812	7.38823	1.37519	1662.6	123.035	0.325029	143.429	4.06775	16.271	101.371	6.0328	7.5616	20.3943	32.9485	3675.36	-137.598	0.460403	5.83088	27.7963	37.9657	96.4183	-0.959347	-3.62428	143.429	44.3913	0.959347	848	292	12	11	23	0.0805793	0.0394368	0.489415	0.0917241	0.42995	187.416	66.2947	67.4497	149.851	81.634	33.8979	5825.25	21.3553
62	WAT-196	WATDE0347	ear 5	ear 5	63.9335	8.45746	7.74492	1.67843	1817.38	114.224	0.386679	131.293	4.93351	19.7341	91.4757	6.69213	5.78819	17.0685	35.3717	3567.57	-125.256	0.459647	6.03723	28.8963	41.5825	85.5094	-0.954017	-3.01222	131.293	39.3041	0.954017	804	286	14	13	27	0.0763774	0.0372701	0.487973	0.0917241	0.406328	187.97	68.9657	71.3709	135.64	78.4621	29.6011	5938.35	16.0574
63	WAT-196	WATDE0347	ear 6	ear 6	52.1718	10.1498	5.27043	1.3719	935.728	105.609	0.47208	120.447	4.56742	12.6873	73.5183	7.11762	8.32403	14.8377	34.7065	2405.48	-113.693	0.342404	6.75408	22.8371	27.4045	87.3374	-0.943925	-4.14869	120.447	29.9047	0.943925	1190	404	12	11	23	0.0626789	0.0310008	0.494597	0.0730435	0.424415	147.683	49.7083	54.1922	120.507	67.2496	25.3745	3905.19	15.8433
64	WAT-196	WATDE0347	ear 7	ear 7	96.7376	13.4343	7.41079	1.15246	2806.19	109.492	0.263006	128.844	4.702	28.212	98.878	5.65791	3.88104	19.352	26.0055	1947.15	-123.172	0.474171	5.6718	16.7929	24.8534	78.0537	-0.955979	-4.95594	128.844	37.0108	0.955979	643	273	11	10	21	0.0723986	0.0338345	0.467337	0.0840741	0.402437	179.9	65.7513	67.0912	129.162	73.5288	35.6009	5294.68	23.2495
65	WAT-196	WATDE0347	ear 8	ear 8	38.2227	10.5101	3.93714	1.49318	1436.49	93.1451	0.384979	110.937	5.25505	17.3417	82.2913	5.23536	5.37117	17.7915	31.6804	1964.12	-106.585	0.412774	4.35116	19.4437	24.1732	80.7498	-0.960778	-4.40924	110.937	33.3315	0.960778	976	348	11	11	22	0.065057	0.0330745	0.508393	0.0833333	0.396895	163.915	50.9365	52.9108	119.925	66.2931	26.8007	3885.42	16.8878
66	WAT-196	WATDE0347	ear 9	ear 9	49.5786	10.2094	4.99288	1.19798	897.061	103.868	0.464436	117.573	4.29867	11.8214	75.4393	7.57862	8.78645	13.7054	35.0367	2737.85	-113.265	0.351335	4.30775	26.3294	31.1654	87.3929	-0.963361	-3.63433	117.573	30.7042	0.963361	1076	330	12	11	23	0.0670888	0.0323531	0.482242	0.0741667	0.436221	153.795	52.6146	55.018	122.377	68.8426	23.6427	4249.65	15.0021
67	WAT-202	WATDE0354	ear 1	ear 1	34.1768	7.50003	4.51792	0.60841	309.772	32.939	0.587539	39.4268	12.1876	16.8751	18.5989	5.07709	1.95193	6.48777	10.9276	1799.24	-33.7112	0.327973	5.7156	48.7502	68.4378	26.2399	-0.855033	-0.492581	39.4268	8.60597	0.855033	386	90	18	17	35	0.0225422	0.012793	0.567516	0.0530435	0.24118	93.4661	90.8711	95.3644	36.7839	22.7876	32.8126	2417.03	16.8322
68	WAT-202	WATDE0354	ear 2	ear 2	35.4594	12.72	2.81796	0.233922	271.804	23.6344	0.588876	28.485	14.84	20.4934	13.3765	4.87246	1.15327	4.85061	7.87712	697.622	-23.6847	0.362249	4.80033	24.7334	36.7467	18.9404	-0.831479	-0.644539	28.485	6.86114	0.831479	165	64	15	15	30	0.0148818	0.00917942	0.61682	0.0331579	0.27684	53.7562	67.5424	68.6318	26.8651	14.0405	39.5734	1059.57	27.3039
69	WAT-202	WATDE0354	ear 3	ear 3	50.5341	11.4666	4.4727	0.434838	473.45	40.5448	0.468588	48.2325	7.29693	16.6787	28.3614	5.27404	2.43094	7.68763	13.2898	2201.57	-42.6293	0.379938	5.60317	45.8664	75.0541	29.3	-0.88383	-0.567981	48.2325	11.1322	0.88383	345	81	18	17	35	0.0265676	0.0158414	0.596266	0.0652	0.242966	109.347	98.9132	102.895	43.7465	26.0511	30.2301	3008.38	16.8833
70	WAT-202	WATDE0354	ear 4	ear 4	47.2037	11.6412	4.0586	0.385325	512.037	36.3953	0.389295	42.7413	6.79069	19.402	26.303	5.73518	1.87586	6.34598	10.2396	1684.49	-34.1462	0.30314	8.59509	47.5348	64.9966	25.9129	-0.798904	-0.525354	42.7413	7.85524	0.798904	289	107	19	18	37	0.0230511	0.0117863	0.511311	0.05	0.235726	97.7878	93.0406	97.5711	35.5651	23.0518	30.073	2662.45	15.9325
71	WAT-202	WATDE0354	ear 5	ear 5	57.5599	11.358	5.09302	0.446001	527.754	40.936	0.407242	48.8393	8.26034	17.5532	29.9718	5.17959	2.3321	7.90332	12.2058	2088.75	-43.711	0.402617	5.12825	45.4319	73.3106	28.4708	-0.894997	-0.596245	48.8393	11.4628	0.894997	316	84	19	18	37	0.0262436	0.0151782	0.578359	0.062	0.24481	107.2	97.9761	102.12	43.3935	25.9265	32.0088	2934.3	16.4279
72	WAT-202	WATDE0354	ear 6	ear 6	41.1264	7.71102	5.37008	0.572403	721.082	34.2849	0.390706	42.1915	5.99745	23.9898	29.8851	4.33624	1.42914	7.9066	11.6763	1383.67	-37.946	0.334722	4.24549	41.9822	53.1203	26.003	-0.899376	-0.71434	42.1915	8.70378	0.899376	268	90	15	14	29	0.0246887	0.014592	0.591039	0.0604762	0.241285	102.322	82.2162	87.0341	38.9897	25.0588	26.5602	2459.95	12.575
73	WAT-202	WATDE0354	ear 7	ear 7	50.5586	12.5365	4.06247	0.330096	309.332	31.3032	0.581382	37.8192	7.71478	15.4296	20.1727	4.80407	2.02878	6.51598	11.728	1513.69	-32.9928	0.413369	4.82635	41.4669	67.5043	22.408	-0.872384	-0.488751	37.8192	9.26278	0.872384	223	66	17	16	33	0.0204825	0.0121206	0.591756	0.0482609	0.251149	81.5553	89.5373	91.5793	35.1719	19.0724	30.8591	1990.43	19.3974
74	WAT-325	WATDE0045	ear 1	ear 1	64.2053	12.3852	5.54118	1.02285	1435.26	33.1297	0.164387	48.9338	3.3778	37.1557	38.4441	2.09628	0.891644	15.8041	6.31972	2000.51	-39.5172	0.323314	9.41661	46.1632	61.9262	32.2488	-0.807564	-0.638133	48.9338	10.4265	0.807564	410	122	21	21	42	0.0306665	0.0200856	0.654971	0.0958333	0.209589	146.317	111.385	114.51	45.9452	31.3314	38.2817	4208.48	16.1276
75	WAT-325	WATDE0045	ear 2	ear 2	47.1501	12.582	3.91615	0.290706	617.927	25.5933	0.231443	33.3631	3.1455	24.1155	25.4129	3.29398	1.06128	7.76973	5.88164	1573.4	-29.1636	0.248372	4.19948	57.6675	67.104	23.3755	-0.874128	-0.434603	33.3631	5.80581	0.874128	413	89	17	17	34	0.0214648	0.0124242	0.578817	0.0565217	0.219813	97.6504	102.633	104.634	30.216	21.3903	32.5035	2886.29	14.7224
76	WAT-325	WATDE0045	ear 3	ear 3	66.6957	17.2775	3.9088	0.319629	345.909	37.4213	0.375232	44.9163	5.0816	13.2122	26.1828	4.99282	2.83234	7.49503	9.82465	1832.59	-37.2549	0.297544	7.66144	16.2611	70.1261	26.1349	-0.829429	-0.531256	44.9163	7.77629	0.829429	385	96	18	17	35	0.0269081	0.0156875	0.583004	0.0545833	0.287405	93.6243	81.6848	83.5058	34.6846	21.8497	32.5223	2706.78	19.8082
77	WAT-325	WATDE0045	ear 4	ear 4	47.102	12.2614	3.9142	0.510807	773.052	40.3931	0.286019	48.2388	3.34402	24.5229	31.3724	5.14844	1.64716	7.8457	8.97308	2259.94	-43.492	0.312298	4.74681	62.4218	73.5686	30.6558	-0.901598	-0.591176	48.2388	9.57374	0.901598	301	56	18	17	35	0.028832	0.0203785	0.706801	0.0947826	0.215002	134.101	104.712	106.976	40.2268	27.8573	39.0136	3798.01	16.5204
78	WAT-325	WATDE0045	ear 5	ear 5	19.6272	3.23956	6.14611	2.72197	466.353	54.7086	0.589439	65.5263	5.39926	14.0381	33.5742	5.05736	3.89716	10.8176	19.79	3554.69	-58.1258	0.302364	7.40046	3.23956	89.6277	39.6226	-0.887061	-0.648525	65.5263	11.9805	0.887061	557	144	16	15	31	0.0338205	0.0200507	0.592856	0.096	0.208861	161.928	105.737	119.697	49.5002	37.15	11.8784	5281.68	7.6547
79	WAT-325	WATDE0045	ear 6	ear 6	55.232	15.9277	3.58847	0.4798	534.336	34.3645	0.304209	43.8278	7.49541	17.8016	29.8477	3.63135	1.93042	9.46329	9.07994	1437.51	-39.2627	0.373506	4.56507	36.5401	59.0264	24.3513	-0.895841	-0.665173	43.8278	9.09535	0.895841	332	108	23	22	45	0.0218981	0.0152914	0.698297	0.0621739	0.245945	89.0364	90.5678	93.5168	37.7142	21.4946	31.8555	2234.65	19.2009
80	WAT-325	WATDE0045	ear 7	ear 7	41.0135	9.81145	4.35158	0.822864	629.961	43.2726	0.327143	53.2036	7.63113	18.5327	33.8571	4.35733	2.33493	9.93098	11.0761	2298.26	-48.4926	0.324731	4.71092	4.36064	79.5817	28.8803	-0.911455	-0.609344	53.2036	9.37833	0.911455	216	56	15	14	29	0.0262504	0.0191643	0.730056	0.0908333	0.210983	124.42	106.711	113.753	39.6428	27.2421	22.8934	3586.72	11.4864
81	WAT-325	WATDE0045	ear 8	ear 8	47.7068	13.999	3.44031	0.254013	996.113	29.0937	0.24743	34.8309	3.49975	37.6223	26.3359	5.07101	0.773309	5.73725	6.5163	715.973	-30.7034	0.472259	4.1275	21.8734	34.9975	20.434	-0.881499	-0.877304	34.8309	9.65012	0.881499	424	101	14	14	28	0.021351	0.0149705	0.701162	0.0543478	0.275457	77.511	80.4324	83.4975	33.4802	20.3969	45.4967	1900.5	30.2681
82	WAT-548	WATDE0748	ear 1	ear 1	57.3257	9.99371	6.09335	1.5918	446.706	49.7489	0.322678	68.4394	8.45622	10.7625	41.6432	2.66172	4.62245	18.6905	13.4373	2282.49	-63.8014	0.380826	4.63802	41.5123	55.3498	41.1731	-0.932232	-1.15269	68.4394	15.6798	0.932232	591	174	15	15	30	0.0355567	0.0230299	0.647695	0.113125	0.203579	174.658	74.6625	78.5935	59.6574	36.3496	36.0298	3129.02	12.9444
83	WAT-548	WATDE0748	ear 2	ear 2	48.4869	10.2277	4.8169	0.741948	1236.74	54.2344	0.331982	63.7598	6.81849	28.1263	43.7553	5.69371	1.92825	9.52532	14.526	1764.32	-59.9082	0.374997	3.85153	35.7971	46.0248	38.2518	-0.939593	-1.30165	63.7598	14.3443	0.939593	506	164	15	14	29	0.0357965	0.0223078	0.623183	0.12	0.185898	192.56	82.0865	86.0687	58.4956	36.0162	41.94	3438.34	17.7502
84	WAT-548	WATDE0748	ear 3	ear 3	52.7468	11.0184	5.24214	1.4748	632.89	54.1082	0.288416	73.39	4.23784	12.7135	49.5655	2.80618	4.25596	19.2818	14.2955	2877.98	-67.8506	0.336985	5.53937	43.226	60.1774	47.7089	-0.924521	-1.12751	73.39	16.0772	0.924521	741	197	16	16	32	0.0412346	0.025137	0.609609	0.121111	0.207553	198.67	82.8506	86.7247	67.6915	42.1305	30.4896	4093.4	13.9505
85	WAT-548	WATDE0748	ear 4	ear 4	54.413	12.5344	4.4346	0.570084	453.802	58.2396	0.50505	67.65	6.68504	12.5344	36.3498	6.18889	4.64637	9.41035	18.3585	2534.88	-63.907	0.313277	3.74295	49.3021	57.6584	43.8456	-0.944672	-1.10837	67.65	13.7358	0.944672	238	65	13	13	26	0.0358917	0.0214693	0.598171	0.108824	0.197286	181.927	80.2878	86.1694	59.9466	36.1807	37.899	3552.63	17.5545
86	WAT-548	WATDE0748	ear 5	ear 5	50.8319	11.2084	4.71604	0.772781	618.364	47.0952	0.266169	58.4932	3.44873	15.5193	39.587	4.13187	3.03462	11.398	10.5368	2477.74	-54.8805	0.294909	3.6127	50.8687	58.6284	42.0993	-0.938237	-0.936075	58.4932	12.4155	0.938237	332	68	14	14	28	0.0370842	0.0229021	0.617569	0.114706	0.199659	185.738	82.7325	85.1452	54.8085	36.7258	38.8747	3871.15	15.0716
87	WAT-720	WATDE0930	ear 1	ear 1	27.6767	6.65936	4.33464	0.928747	526.838	52.3869	0.526111	61.0641	5.70802	14.2701	36.7911	6.03733	3.67111	8.67717	19.3562	2178.08	-56.961	0.412088	4.10314	35.1995	73.253	29.7703	-0.932806	-0.777593	61.0641	12.268	0.932806	366	97	21	20	41	0.0283825	0.0140972	0.496685	0.0523077	0.269505	105.314	89.2306	96.4733	48.5209	28.384	16.1727	2937.82	10.8923
88	WAT-720	WATDE0930	ear 2	ear 2	46.1197	12.083	4.02076	0.772872	314.528	54.5113	0.454854	66.055	6.04147	8.63068	36.6572	4.72217	6.31599	11.5437	16.6737	2019.8	-61.5613	0.442335	4.49374	26.7551	64.7301	31.257	-0.93197	-0.951046	66.055	13.8261	0.93197	313	104	16	16	32	0.0268705	0.0118252	0.440082	0.042	0.281553	95.4368	82.7305	88.7933	50.057	27.3701	22.4398	2537.41	14.3699
89	WAT-720	WATDE0930	ear 3	ear 3	35.4372	13.4524	2.67761	0.36544	160.618	40.9429	0.702514	46.7288	6.27779	8.07145	20.5353	7.07637	5.07256	5.78586	14.4264	1799.47	-42.4103	0.421239	4.31843	43.0477	67.2621	26.7369	-0.907585	-0.630524	46.7288	11.2626	0.907585	315	72	17	16	33	0.0242834	0.0140613	0.57905	0.0446154	0.315167	77.0493	81.152	82.496	41.2361	21.9556	24.2143	2141.56	17.9229
90	WAT-720	WATDE0930	ear 4	ear 4	37.3173	12.8703	2.98609	0.442235	299.029	47.3273	0.443157	54.4582	5.1481	9.43819	31.6088	6.6369	5.01444	7.13093	14.0077	1964.61	-49.1384	0.371178	5.31987	30.8886	62.6353	31.3458	-0.902313	-0.784515	54.4582	11.6349	0.902313	315	104	18	18	36	0.0276397	0.0134072	0.485069	0.0466667	0.287296	96.2063	81.3621	83.5375	46.431	26.6753	24.8825	2549.39	15.7588
91	WAT-720	WATDE0930	ear 5	ear 5	32.1598	14.9354	2.19971	0.315915	381.014	36.9049	0.51835	42.2997	6.63794	14.9354	25.4233	6.8408	2.47097	5.39482	13.1782	1175.25	-38.1246	0.414503	4.17509	22.403	52.2737	22.4944	-0.901297	-0.729326	42.2997	9.32399	0.901297	244	80	13	12	25	0.02141	0.0115548	0.53969	0.0344	0.335895	63.7403	72.4624	74.4281	35.8771	18.8207	26.5517	1722.72	19.5799
92	WAT-720	WATDE0930	ear 6	ear 6	42.5634	13.8357	3.16558	0.412697	425.071	47.3502	0.415547	54.7986	3.45894	11.2415	37.3347	6.35704	4.21207	7.44846	15.5143	1836.71	-49.8996	0.418594	4.89898	34.5894	60.5314	30.3361	-0.9106	-0.82436	54.7986	12.6985	0.9106	358	107	15	15	30	0.0272759	0.0158094	0.579611	0.0536	0.294952	92.4758	82.8442	84.7595	49.122	26.3737	23.3478	2471.73	16.36
93	WAT-720	WATDE0930	ear 7	ear 7	46.4757	10.9693	4.47002	0.836628	1027.51	44.0383	0.258383	55.6616	3.98885	23.9331	42.5611	3.78881	1.84006	11.6233	10.9971	2074.04	-49.5504	0.376561	6.11116	42.8801	63.8215	32.4727	-0.890209	-0.776391	55.6616	12.228	0.890209	280	93	19	19	38	0.031393	0.013908	0.443028	0.0583333	0.238422	131.67	97.6447	100.662	50.9957	31.4773	22.9359	3547.54	13.3234
[truncated: 33 more columns]

## Sheet: S7 Length traits
order	Variety ID	GRU code	spike ID	original_ears_ID	z-length	SL
1	paragon	paragon	ear 1	ear 1	87.274	90.558
2	paragon	paragon	ear 2	ear 2	111.079	113.539
3	paragon	paragon	ear 3	ear 3	106.375	108.642
4	paragon	paragon	ear 4	ear 4	97.8589	104.478			SL : is the Skeleton-length of the spike in mm
5	paragon	paragon	ear 5	ear 5	93.3334	101.659			z-length : the length of the highest variance of the spike in mm
6	paragon	paragon	ear 6	ear 6	80.2356	93.0091
7	paragon	paragon	ear 7	ear 7	94.0403	108.6
8	paragon	paragon	ear 8	ear 8	103.372	105.618
9	WAT-93	WATDE0227	ear 1	ear 1	86.2945	88.7282
10	WAT-93	WATDE0227	ear 2	ear 2	84.4138	85.6903
11	WAT-93	WATDE0227	ear 3	ear 3	86.346	89.1072
12	WAT-93	WATDE0227	ear 4	ear 4	88.0687	90.002
13	WAT-93	WATDE0227	ear 5	ear 5	94.8249	97.5994
14	WAT-93	WATDE0227	ear 6	ear 6	95.8998	97.9644
15	WAT-93	WATDE0227	ear 7	ear 7	85.9632	88.5274
16	WAT-93	WATDE0227	ear 8	ear 8	98.0888	102.056
17	WAT-93	WATDE0227	ear 9	ear 9	95.1726	102.415
18	WAT-94	WATDE0228	ear 1	ear 1	82.8203	84.7907
19	WAT-94	WATDE0228	ear 2	ear 2	85.0759	86.0468
20	WAT-94	WATDE0228	ear 3	ear 3	107.302	108.384
21	WAT-94	WATDE0228	ear 4	ear 4	78.4834	79.5278
22	WAT-94	WATDE0228	ear 5	ear 5	95.3432	96.2897
23	WAT-94	WATDE0228	ear 6	ear 6	91.0287	91.7725
24	WAT-94	WATDE0228	ear 7	ear 7	84.1804	85.284
25	WAT-94	WATDE0228	ear 8	ear 8	81.8579	83.9534
26	WAT-94	WATDE0228	ear 9	ear 9	103.046	105.956
27	WAT-117	WATDE0253	ear 1	ear 1	89.6912	97.745
28	WAT-117	WATDE0253	ear 2	ear 2	106.292	109.494
29	WAT-117	WATDE0253	ear 3	ear 3	87.2854	90.6937
30	WAT-117	WATDE0253	ear 4	ear 4	90.4828	94.1012
31	WAT-117	WATDE0253	ear 5	ear 5	85.492	91.7253
32	WAT-117	WATDE0253	ear 6	ear 6	83.4857	89.9848
33	WAT-117	WATDE0253	ear 7	ear 7	82.0797	89.1297
34	WAT-149	WATDE0020	ear 1	ear 1	91.5251	93.8823
35	WAT-149	WATDE0020	ear 2	ear 2	81.356	83.605
36	WAT-149	WATDE0020	ear 3	ear 3	85.8924	86.9026
37	WAT-149	WATDE0020	ear 4	ear 4	65.0144	67.8682
38	WAT-149	WATDE0020	ear 5	ear 5	71.0987	75.8168
39	WAT-149	WATDE0020	ear 6	ear 6	66.6515	68.2217
40	WAT-149	WATDE0020	ear 7	ear 7	63.2219	65.4211
41	WAT-156	WATDE0296	ear 1	ear 2	79.3474	81.3415
42	WAT-156	WATDE0296	ear 2	ear 3	87.5985	89.8956
43	WAT-156	WATDE0296	ear 3	ear 4	77.6216	79.6973
44	WAT-156	WATDE0296	ear 4	ear 5	72.5652	73.8117
45	WAT-156	WATDE0296	ear 5	ear 6	77.5984	80.1394
46	WAT-156	WATDE0296	ear 6	ear 7	96.5324	99.6027
47	WAT-156	WATDE0296	ear 7	ear 8	82.3469	84.8601
48	WAT-156	WATDE0296	ear 8	ear 9	80.1589	83.5044
49	WAT-176	WATDE0323	ear 1	ear 1	53.1084	55.7552
51	WAT-176	WATDE0323	ear 2	ear 3	46.7667	49.25
52	WAT-176	WATDE0323	ear 3	ear 4	42.8736	47.2114
53	WAT-176	WATDE0323	ear 4	ear 5	47.2682	50.887
54	WAT-176	WATDE0323	ear 5	ear 6	45.1737	48.6767
55	WAT-176	WATDE0323	ear 6	ear 7	42.1738	44.4657
56	WAT-176	WATDE0323	ear 7	ear 8	39.3882	41.4226
57	WAT-176	WATDE0323	ear 8	ear 9	42.3281	46.912
58	WAT-196	WATDE0347	ear 1	ear 1	64.0334	66.4322
59	WAT-196	WATDE0347	ear 2	ear 2	71.2448	73.3727
60	WAT-196	WATDE0347	ear 3	ear 3	70.0201	72.1014
61	WAT-196	WATDE0347	ear 4	ear 4	66.2947	67.4497
62	WAT-196	WATDE0347	ear 5	ear 5	68.9657	71.3709
63	WAT-196	WATDE0347	ear 6	ear 6	49.7083	54.1922
64	WAT-196	WATDE0347	ear 7	ear 7	65.7513	67.0912
65	WAT-196	WATDE0347	ear 8	ear 8	50.9365	52.9108
66	WAT-196	WATDE0347	ear 9	ear 9	52.6146	55.018
67	WAT-202	WATDE0354	ear 1	ear 1	90.8711	95.3644
68	WAT-202	WATDE0354	ear 2	ear 2	67.5424	68.6318
69	WAT-202	WATDE0354	ear 3	ear 3	98.9132	102.895
70	WAT-202	WATDE0354	ear 4	ear 4	93.0406	97.5711
71	WAT-202	WATDE0354	ear 5	ear 5	97.9761	102.12
72	WAT-202	WATDE0354	ear 6	ear 6	82.2162	87.0341
73	WAT-202	WATDE0354	ear 7	ear 7	89.5373	91.5793
74	WAT-325	WATDE0045	ear 1	ear 1	111.385	114.51
75	WAT-325	WATDE0045	ear 2	ear 2	102.633	104.634
76	WAT-325	WATDE0045	ear 3	ear 3	81.6848	83.5058
77	WAT-325	WATDE0045	ear 4	ear 4	104.712	106.976
78	WAT-325	WATDE0045	ear 5	ear 5	105.737	119.697
79	WAT-325	WATDE0045	ear 6	ear 6	90.5678	93.5168
80	WAT-325	WATDE0045	ear 7	ear 7	106.711	113.753
81	WAT-325	WATDE0045	ear 8	ear 8	80.4324	83.4975
82	WAT-548	WATDE0748	ear 1	ear 1	74.6625	78.5935
83	WAT-548	WATDE0748	ear 2	ear 2	82.0865	86.0687
84	WAT-548	WATDE0748	ear 3	ear 3	82.8506	86.7247
85	WAT-548	WATDE0748	ear 4	ear 4	80.2878	86.1694
86	WAT-548	WATDE0748	ear 5	ear 5	82.7325	85.1452
87	WAT-720	WATDE0930	ear 1	ear 1	89.2306	96.4733
88	WAT-720	WATDE0930	ear 2	ear 2	82.7305	88.7933
89	WAT-720	WATDE0930	ear 3	ear 3	81.152	82.496
90	WAT-720	WATDE0930	ear 4	ear 4	81.3621	83.5375
91	WAT-720	WATDE0930	ear 5	ear 5	72.4624	74.4281
92	WAT-720	WATDE0930	ear 6	ear 6	82.8442	84.7595
93	WAT-720	WATDE0930	ear 7	ear 7	97.6447	100.662

## Sheet: S8 Segments Traits
order	Variety ID	GRU code	spike ID	original_ears_ID	ZAS_AUC	ZAS_ΔZ	ZAS_MT	ZAS_Slope		Base AUC	Base_Amplitude	Base_CV	Base_ET	Base_HalfChange_Length	Base_ΔZ	Base_MT	Base_RC (by the Start)	Base_Slope	Base_ST	Base_SD		Apex AUC	Apex_Amplitude	Apex_CV	Apex_ET	Apex_HalfChange_Length	Apex_ΔZ	Apex_MT	Apex_RC (by the Start)	Apex_Slope	Apex_ST	Apex_SD	Apex_Tapering_Index
1	paragon	paragon	ear 1	ear 1	65.2878	16.065	4.34837	0.885998		1242.95	63.0604	0.352131	79.6448	6.24751	20.5275	60.0324	3.80239	3.07199	16.5844	21.1393		2582.63	-73.5785	0.369193	6.06628	33.0226	51.7651	49.7721	-0.923833	-1.42139	79.6448	18.3755	0.923833
2	paragon	paragon	ear 2	ear 2	69.8184	14.9042	5.03619	0.783574		1471.9	75.2686	0.320854	90.7164	4.58591	22.9296	63.6631	4.87244	3.2826	15.4478	20.4266		4333.42	-86.5938	0.397421	4.12261	48.1521	75.6676	57.1222	-0.954555	-1.1444	90.7164	22.7016	0.954555
3	paragon	paragon	ear 3	ear 3	118.599	16.4761	7.64534	1.25005		2231.08	80.2277	0.228604	104.878	3.29523	25.2634	87.3314	3.25464	3.17565	24.6502	19.9643		4348.09	-100.649	0.40644	4.22849	48.33	67.003	64.7271	-0.959682	-1.50216	104.878	26.3077	0.959682
4	paragon	paragon	ear 4	ear 4	54.9501	9.0036	6.84578	1.98121		631.6	77.638	0.47846	100.087	7.0028	11.0044	57.7179	3.45847	7.05518	22.4487	27.6157		5035.31	-93.1943	0.342024	6.89238	60.024	79.0316	63.5849	-0.931136	-1.1792	100.087	21.7476	0.931136
5	paragon	paragon	ear 5	ear 5	77.6918	12.3914	6.59699	1.18959		1929.7	83.5643	0.248468	101.785	1.90637	24.7827	77.2033	4.58631	3.37187	18.2204	19.1826		3396.42	-94.1385	0.387682	7.6461	40.0336	57.1909	59.3108	-0.92488	-1.64604	101.785	22.9937	0.92488
6	paragon	paragon	ear 6	ear 6	66.879	7.45322	9.87629	3.18239		466.376	66.2121	0.359647	96.0761	6.62509	8.28136	56.9212	2.21712	7.99531	29.8639	20.4716		3702.4	-91.9555	0.372334	4.12057	46.3756	66.2509	55.8131	-0.957111	-1.38799	96.0761	20.7811	0.957111
7	paragon	paragon	ear 7	ear 7	66.4678	3.84286	19.304	8.20814		537.864	73.1147	0.461266	116.22	6.72501	8.64643	63.9522	1.69617	8.45605	43.1057	29.499		5624.34	-109.955	0.353766	6.26573	57.6429	82.6215	67.9951	-0.946088	-1.33082	116.22	24.0544	0.946088
8	paragon	paragon	ear 8	ear 8	68.6512	14.7987	5.17033	1.14275		2766.53	84.4137	0.251977	104.947	5.69183	34.151	80.4194	4.11103	2.47178	20.5335	20.2639		3684.58	-100.575	0.488147	4.3719	39.8428	63.7485	57.7437	-0.958342	-1.57769	104.947	28.1874	0.958342
9	WAT-93	WATDE0227	ear 1	ear 1	19.63	6.18414	3.07116	0.756755		1208.75	38.9858	0.395945	43.6753	9.71794	38.8717	30.9422	8.31348	1.00293	4.68947	12.2514		1176.72	-38.5478	0.32184	5.12748	30.9207	42.4056	27.6808	-0.8826	-0.909027	43.6753	8.9088	0.8826
10	WAT-93	WATDE0227	ear 2	ear 2	46.3595	11.347	4.1387	0.466593		838.386	43.5462	0.346064	51.0221	10.4741	25.3125	32.9924	5.82485	1.72034	7.47593	11.4175		1548.92	-46.3161	0.357037	4.70598	36.6594	49.7521	31.0764	-0.907766	-0.930938	51.0221	11.0954	0.907766
11	WAT-93	WATDE0227	ear 3	ear 3	69.2275	14.9959	4.65527	0.305538		923.082	38.1527	0.326324	45.7591	11.4674	31.756	29.0035	5.01594	1.20144	7.6063	9.46454		1231.55	-40.1905	0.333066	5.56852	30.8738	40.5771	30.2511	-0.878308	-0.990474	45.7591	10.0756	0.878308
12	WAT-93	WATDE0227	ear 4	ear 4	30.5673	8.12075	3.7836	0.524512		870.995	34.6344	0.319279	40.7232	8.12076	29.7761	29.0796	5.68826	1.16316	6.08876	9.28449		1468.87	-35.266	0.293708	5.45721	43.3107	51.4315	28.4654	-0.865993	-0.685689	40.7232	8.36054	0.865993
13	WAT-93	WATDE0227	ear 5	ear 5	37.0565	5.83628	6.56106	1.04598		659.296	52.8967	0.354673	63.7805	3.89086	15.5634	42.066	4.86014	3.39878	10.8838	14.9197		3097.06	-58.5876	0.37368	5.19286	51.5539	74.899	41.2618	-0.918582	-0.782222	63.7805	15.4187	0.918582
14	WAT-93	WATDE0227	ear 6	ear 6	49.4162	9.81063	5.18924	0.652537		970.414	44.9187	0.311323	54.8312	8.82956	26.4887	36.4828	4.53152	1.69577	9.91249	11.3579		2149.47	-50.3249	0.30815	4.50623	52.9774	60.8259	35.2481	-0.917816	-0.82736	54.8312	10.8617	0.917816
15	WAT-93	WATDE0227	ear 7	ear 7	45.4736	9.77752	4.79713	0.68988		759.227	35.5865	0.310204	45.3656	7.11092	22.2216	33.9125	3.63904	1.60143	9.77908	10.5198		1696.99	-40.8378	0.312775	4.52774	47.9987	55.9985	30.2205	-0.900194	-0.729266	45.3656	9.45221	0.900194
16	WAT-93	WATDE0227	ear 8	ear 8	45.4219	10.2444	4.83747	1.05836		518.064	41.0677	0.306435	55.3627	3.07332	13.3177	38.6096	2.87286	3.08369	14.295	11.8313		2768.79	-49.6128	0.32723	5.74989	59.4175	77.8574	35.4974	-0.896141	-0.637226	55.3627	11.6158	0.896141
17	WAT-93	WATDE0227	ear 9	ear 9	72.3158	7.77323	9.37839	1.50335		1436.81	66.9665	0.38778	82.7893	5.82992	24.2913	58.7704	4.23225	2.7568	15.8229	22.79		3001.5	-78.2443	0.401267	4.54507	37.8945	64.1291	46.7571	-0.945101	-1.2201	82.7893	18.7621	0.945101
18	WAT-94	WATDE0228	ear 1	ear 1	42.2884	9.31653	4.6077	0.426786		730.898	34.3651	0.334793	41.7158	6.77566	25.4087	28.6291	4.6751	1.35249	7.35066	9.58481		1441.84	-34.4943	0.279573	7.22145	40.6539	49.1235	29.2685	-0.826889	-0.702196	41.7158	8.18268	0.826889
19	WAT-94	WATDE0228	ear 2	ear 2	42.6119	9.56367	4.46153	0.486078		1070.42	34.9639	0.304757	41.815	6.95539	33.9076	31.3879	5.10344	1.03115	6.85105	9.56567		1251.52	-37.5241	0.304578	4.29088	36.5158	42.6018	29.2508	-0.897384	-0.88081	41.815	8.90913	0.897384
20	WAT-94	WATDE0228	ear 3	ear 3	50.8166	6.57716	7.82677	1.15711		1748.15	36.6327	0.241857	48.8681	8.76955	44.9439	38.6975	2.994	0.815075	12.2354	9.35927		2074.51	-41.6546	0.292977	7.21352	44.9439	57.0021	36.2359	-0.852388	-0.730755	48.8681	10.6163	0.852388
21	WAT-94	WATDE0228	ear 4	ear 4	31.9129	8.84862	3.64966	0.485177		970.612	34.0571	0.334652	40.3276	8.0442	32.1768	29.9975	5.43135	1.05844	6.27047	10.0387		996.027	-34.8823	0.323485	5.4453	32.1768	38.6122	25.7363	-0.864973	-0.903401	40.3276	8.3253	0.864973
22	WAT-94	WATDE0228	ear 5	ear 5	42.9925	5.8461	7.51877	1.52733		978.286	42.7986	0.327437	55.7702	9.74351	26.3075	37.0861	3.29941	1.62686	12.9716	12.1433		2501.35	-48.8065	0.324771	6.96368	45.7945	64.3071	38.7846	-0.875136	-0.75896	55.7702	12.5961	0.875136
23	WAT-94	WATDE0228	ear 6	ear 6	36.3404	7.45255	4.92413	0.580119		1247.31	38.5918	0.312172	46.0608	9.31569	37.2628	33.3099	5.16695	1.03567	7.46897	10.3984		1345.96	-40.1443	0.362935	5.9165	33.5365	47.51	28.2849	-0.87155	-0.844965	46.0608	10.2656	0.87155
24	WAT-94	WATDE0228	ear 7	ear 7	40.3884	8.60273	4.76139	0.561635		764.541	33.7311	0.336236	41.5739	8.60274	26.6685	28.5446	4.30092	1.26483	7.84277	9.59771		1447.02	-35.8051	0.313409	5.76877	41.2931	49.8959	28.9105	-0.861241	-0.717597	41.5739	9.0608	0.861241
25	WAT-94	WATDE0228	ear 8	ear 8	48.2283	8.54439	5.67865	0.630117		571.032	42.2003	0.324622	50.913	4.27219	15.3799	36.7434	4.84353	2.74386	8.71271	11.9277		2197.16	-46.3729	0.306859	4.54013	43.5764	60.6652	36.0999	-0.910826	-0.764407	50.913	11.0776	0.910826
26	WAT-94	WATDE0228	ear 9	ear 9	39.8126	5.26185	7.65355	1.27384		1630.09	42.9829	0.273405	54.4243	9.47134	39.9901	40.5616	3.75679	1.07484	11.4414	11.0898		2223.3	-47.3282	0.297512	7.09611	41.0425	58.9328	37.6038	-0.869615	-0.803088	54.4243	11.1876	0.869615
27	WAT-117	WATDE0253	ear 1	ear 1	40.9227	6.42284	6.35437	1.33613		1012.18	55.1302	0.301605	65.656	2.75264	21.1036	47.551	5.23763	2.61236	10.5258	14.3416		2504.23	-59.2964	0.375116	6.3596	40.3721	63.3108	39.5039	-0.903138	-0.936593	65.656	14.8185	0.903138
28	WAT-117	WATDE0253	ear 2	ear 2	51.6905	10.8699	4.94764	0.871024		792.952	55.9333	0.358964	67.5374	7.6089	18.4788	42.7259	4.82015	3.0269	11.6041	15.3371		3092.43	-63.1462	0.399495	4.39124	48.9144	78.263	39.4647	-0.934981	-0.806846	67.5374	15.7659	0.934981
29	WAT-117	WATDE0253	ear 3	ear 3	55.1259	10.1535	5.61998	0.964219		964.628	45.4675	0.276138	58.081	4.61525	22.1532	43.2157	3.60469	2.05241	12.6134	11.9335		1998.43	-53.3513	0.410538	4.72966	31.3837	59.0752	33.7913	-0.918568	-0.903108	58.081	13.8726	0.918568
30	WAT-117	WATDE0253	ear 4	ear 4	37.8442	7.39019	5.24668	0.870398		779.895	51.3248	0.293881	60.7942	3.6951	17.5517	43.969	5.4201	2.92421	9.46935	12.9217		2502.87	-56.0919	0.343883	4.70226	43.4174	66.5117	37.5637	-0.922653	-0.843339	60.7942	12.9175	0.922653
31	WAT-117	WATDE0253	ear 5	ear 5	33.6663	6.17672	5.59017	1.20085		244.32	58.7876	0.715313	69.064	5.29433	7.94149	31.6555	5.72066	7.40259	10.2764	22.6436		3079.61	-63.9805	0.385602	5.08348	45.8842	73.2382	41.99	-0.926395	-0.873595	69.064	16.1914	0.926395
32	WAT-117	WATDE0253	ear 6	ear 6	46.4201	7.78066	6.51527	1.99085		755.312	46.1374	0.264669	65.3404	6.91615	16.4258	45.7976	2.40261	2.80883	19.203	12.1212		2178.39	-59.4736	0.382568	5.86675	35.4452	61.3808	35.4913	-0.910212	-0.968929	65.3404	13.5779	0.910212
33	WAT-117	WATDE0253	ear 7	ear 7	35.365	7.54673	4.74348	0.906947		336.095	46.82	0.455032	55.5018	7.54673	10.9008	30.9221	5.39287	4.29508	8.68182	14.0705		2367.08	-48.8683	0.364572	6.63349	51.1501	64.5665	36.5895	-0.880481	-0.756868	55.5018	13.3395	0.880481
34	WAT-149	WATDE0020	ear 1	ear 1	96.7084	16.836	5.9187	0.721623		2037.12	69.5404	0.278874	84.6754	8.41798	31.8013	63.6535	4.59468	2.18672	15.135	17.7513		2567.95	-78.2763	0.322952	6.3991	36.4779	43.9606	58.1465	-0.924428	-1.7806	84.6754	18.7785	0.924428
35	WAT-149	WATDE0020	ear 2	ear 2	55.6998	12.513	4.58744	0.800658		2069.14	75.9308	0.321464	87.5691	8.34202	31.6997	64.8715	6.52422	2.39532	11.6383	20.8539		2671.04	-80.3823	0.297312	7.1868	34.2023	38.3733	69.1337	-0.91793	-2.09475	87.5691	20.5542	0.91793
36	WAT-149	WATDE0020	ear 3	ear 3	59.2125	16.6776	3.70959	0.60981		1271.45	62.6452	0.33199	74.4641	7.89992	23.6997	53.2731	5.30042	2.64329	11.8189	17.6861		2685.71	-69.1207	0.296781	5.34344	41.2551	46.5217	57.4001	-0.928241	-1.48577	74.4641	17.0352	0.928241
37	WAT-149	WATDE0020	ear 4	ear 4	67.7319	19.2551	3.71144	0.808045		999.765	80.9826	0.318901	98.0948	3.98382	14.6073	67.9714	4.73247	5.54397	17.1121	21.6761		2138.93	-92.3043	0.338962	5.79047	25.8948	31.8705	66.8036	-0.940971	-2.89623	98.0948	22.6439	0.940971
38	WAT-149	WATDE0020	ear 5	ear 5	58.945	13.0742	4.69658	1.11027		1960.9	95.4894	0.326684	110.829	6.53709	24.6957	78.9365	6.22489	3.86664	15.3399	25.7873		2925.82	-103.607	0.288935	7.22227	31.2328	34.1381	85.1494	-0.934834	-3.03494	110.829	24.6026	0.934834
39	WAT-149	WATDE0020	ear 6	ear 6	54.443	18.3846	3.03673	0.426928		655.362	64.6229	0.442067	73.6197	7.49003	14.98	43.6429	7.18285	4.31393	8.99684	19.2931		1920.19	-68.7468	0.297201	4.8729	30.641	34.0456	56.0641	-0.93381	-2.01926	73.6197	16.6623	0.93381
40	WAT-149	WATDE0020	ear 7	ear 7	69.7599	18.0728	3.92149	0.469067		1076.11	68.2989	0.375324	78.1826	5.16365	18.7182	57.0414	6.91029	3.64879	9.88366	21.409		1448.33	-71.8482	0.337714	6.33438	21.9455	27.1092	53.1661	-0.91898	-2.65033	78.1826	17.9549	0.91898
41	WAT-156	WATDE0296	ear 1	ear 2	77.2735	8.20457	9.82015	2.25303		1601.97	100.351	0.29159	123.432	4.10229	18.0501	88.0779	4.34783	5.55959	23.0807	25.6826		4091.54	-119.11	0.479325	4.32116	35.2797	54.9706	74.2761	-0.964991	-2.1668	123.432	35.6024	0.964991
42	WAT-156	WATDE0296	ear 2	ear 3	64.6138	15.2514	4.39429	0.669526		1298.47	58.3122	0.271237	70.4931	4.4857	23.3256	55.1362	4.78719	2.49992	12.1809	14.955		2108.33	-63.1742	0.391089	7.31887	35.8856	50.2398	41.9116	-0.896176	-1.25745	70.4931	16.3911	0.896176
43	WAT-156	WATDE0296	ear 3	ear 4	60.3722	11.9436	5.2816	1.01012		1686.64	84.3613	0.309525	99.0778	3.18497	22.2948	75.0052	5.73246	3.7839	14.7164	23.216		2758.68	-93.5371	0.409658	5.54073	29.461	44.5896	61.7006	-0.944077	-2.09773	99.0778	25.2761	0.944077
44	WAT-156	WATDE0296	ear 4	ear 5	49.2824	9.65763	5.29849	1.11358		1358.46	79.0236	0.285658	92.2413	3.71447	19.3152	69.6789	5.97863	4.09126	13.2177	19.9043		2661.22	-86.8877	0.36231	5.35365	36.4018	44.5736	59.525	-0.94196	-1.94931	92.2413	21.5665	0.94196
45	WAT-156	WATDE0296	ear 5	ear 6	42.258	4.75967	9.17153	2.72484		1767.11	91.5605	0.375655	108.976	11.8992	24.5917	71.5876	5.25748	3.72323	17.4153	26.8922		3435.26	-103.817	0.392411	5.15837	37.2841	49.1833	69.6432	-0.952665	-2.11083	108.976	27.3287	0.952665
46	WAT-156	WATDE0296	ear 6	ear 7	73.8791	8.87556	8.76582	1.9928		315.078	77.6584	0.458046	99.2452	2.95852	4.93087	63.3186	3.59748	15.7494	21.5869	29.0029		5192.14	-94.0071	0.370732	5.23818	60.1566	83.8248	61.8277	-0.94722	-1.12147	99.2452	22.9215	0.94722
47	WAT-156	WATDE0296	ear 7	ear 8	61.2014	8.42415	7.84225	2.51339		1035.48	78.991	0.36546	103.192	10.9514	16.8483	61.5654	3.2639	4.68836	24.2014	22.4997		4108.47	-96.4476	0.348471	6.74484	48.8601	58.1267	70.4568	-0.934638	-1.65927	103.192	24.5521	0.934638
48	WAT-156	WATDE0296	ear 8	ear 9	46.0152	9.96082	4.85301	0.972131		1604.79	78.7596	0.375192	91.2549	4.9804	24.072	66.1734	6.30314	3.27184	12.4953	24.8277		2561.28	-86.4309	0.441774	4.82396	34.0328	48.1439	53.1131	-0.947138	-1.79526	91.2549	23.464	0.947138
49	WAT-176	WATDE0323	ear 1	ear 1	39.9523	4.36806	9.40022	3.12689		1870.55	117.702	0.304695	135.962	3.27605	18.0183	103.029	6.44613	6.5324	18.2594	31.3924		2899.47	-132.264	0.404613	3.698	25.1164	31.6684	91.1887	-0.972801	-4.17652	135.962	36.8961	0.972801
51	WAT-176	WATDE0323	ear 2	ear 3	39.2588	3.38341	11.6746	3.65582		2861.46	106.219	0.335329	124.578	7.25016	30.934	92.1786	5.78586	3.43373	18.3584	30.9101		877.197	-120.586	0.58684	3.9917	7.7335	13.5336	64.7978	-0.967958	-8.91009	124.578	38.0259	0.967958
52	WAT-176	WATDE0323	ear 3	ear 4	41.4106	3.14595	13.1739	5.31178		1750.13	146.416	0.402662	168.02	7.19074	16.1792	107.811	6.77709	9.04964	21.6045	43.4114		2632.47	-163.807	0.504053	4.21359	17.9769	25.1676	104.273	-0.974922	-6.50863	168.02	52.5593	0.974922
53	WAT-176	WATDE0323	ear 4	ear 5	23.74	1.45174	16.0553	11.751		2869.03	145.488	0.346743	169.18	5.32304	23.2278	122.964	6.1407	6.26351	23.6924	42.6369		2432.77	-164.072	0.447494	5.10802	16.4531	23.2278	104.376	-0.969807	-7.0636	169.18	46.7077	0.969807
54	WAT-176	WATDE0323	ear 5	ear 6	38.9258	2.81268	14.421	7.1795		2342.19	135.157	0.278455	163.164	3.75024	19.6887	118.417	4.82581	6.8647	28.0072	32.9738		2453.37	-159.157	0.470415	4.00708	17.3448	23.9078	102.252	-0.975441	-6.65714	163.164	48.1011	0.975441
55	WAT-176	WATDE0323	ear 6	ear 7	20.3907	1.74963	11.605	9.29025		1728.66	130.094	0.402456	149.629	6.12372	17.4963	98.4547	6.65948	7.4355	19.5351	39.6237		2346.69	-145.56	0.444993	4.06915	18.3711	24.0575	97.1758	-0.972805	-6.05051	149.629	43.2425	0.972805
56	WAT-176	WATDE0323	ear 7	ear 8	32.5057	3.32486	9.99596	4.3164		1352.65	112.642	0.381971	131.569	3.74046	14.1306	95.1393	5.95145	7.97151	18.9269	36.3405		2046.04	-127.427	0.475523	4.14276	17.0399	23.6896	86.0495	-0.968513	-5.37901	131.569	40.9185	0.968513
57	WAT-176	WATDE0323	ear 8	ear 9	23.5487	3.06373	8.15163	4.49915		1498.26	121.097	0.432825	139.398	5.68977	16.194	92.1598	6.61689	7.47792	18.3012	39.8891		2294.29	-133.795	0.417799	5.6035	18.82	24.0721	94.9019	-0.959802	-5.55808	139.398	39.6499	0.959802
58	WAT-196	WATDE0347	ear 1	ear 1	65.9575	7.84741	8.46592	1.51335		3089.95	106.597	0.287472	121.732	5.23161	32.0436	95.8696	7.04317	3.32663	15.1348	27.5599		1627.59	-115.575	0.499756	6.15682	15.6948	24.8502	65.4565	-0.949423	-4.65089	121.732	32.7123	0.949423
59	WAT-196	WATDE0347	ear 2	ear 2	87.9533	10.9212	8.25461	1.42664		3205.01	117.996	0.267993	137.058	3.64039	28.3951	112.002	6.19008	4.1555	19.062	30.0157		2798.63	-132.531	0.501016	4.52669	21.8424	32.7635	85.1011	-0.966972	-4.04507	137.058	42.637	0.966972
60	WAT-196	WATDE0347	ear 3	ear 3	121.902	12.2806	10.4288	2.19934		3066.57	119.72	0.256199	152.194	4.33433	26.006	117.226	3.68673	4.60357	32.4733	30.0333		3206.18	-148.12	0.488258	4.07395	22.394	33.2298	96.0945	-0.973232	-4.45743	152.194	46.9189	0.973232
61	WAT-196	WATDE0347	ear 4	ear 4	92.3565	12.8812	7.38823	1.37519		1662.6	123.035	0.325029	143.429	4.06775	16.271	101.371	6.0328	7.5616	20.3943	32.9485		3675.36	-137.598	0.460403	5.83088	27.7963	37.9657	96.4183	-0.959347	-3.62428	143.429	44.3913	0.959347
62	WAT-196	WATDE0347	ear 5	ear 5	63.9335	8.45746	7.74492	1.67843		1817.38	114.224	0.386679	131.293	4.93351	19.7341	91.4757	6.69213	5.78819	17.0685	35.3717		3567.57	-125.256	0.459647	6.03723	28.8963	41.5825	85.5094	-0.954017	-3.01222	131.293	39.3041	0.954017
63	WAT-196	WATDE0347	ear 6	ear 6	52.1718	10.1498	5.27043	1.3719		935.728	105.609	0.47208	120.447	4.56742	12.6873	73.5183	7.11762	8.32403	14.8377	34.7065		2405.48	-113.693	0.342404	6.75408	22.8371	27.4045	87.3374	-0.943925	-4.14869	120.447	29.9047	0.943925
64	WAT-196	WATDE0347	ear 7	ear 7	96.7376	13.4343	7.41079	1.15246		2806.19	109.492	0.263006	128.844	4.702	28.212	98.878	5.65791	3.88104	19.352	26.0055		1947.15	-123.172	0.474171	5.6718	16.7929	24.8534	78.0537	-0.955979	-4.95594	128.844	37.0108	0.955979
65	WAT-196	WATDE0347	ear 8	ear 8	38.2227	10.5101	3.93714	1.49318		1436.49	93.1451	0.384979	110.937	5.25505	17.3417	82.2913	5.23536	5.37117	17.7915	31.6804		1964.12	-106.585	0.412774	4.35116	19.4437	24.1732	80.7498	-0.960778	-4.40924	110.937	33.3315	0.960778
66	WAT-196	WATDE0347	ear 9	ear 9	49.5786	10.2094	4.99288	1.19798		897.061	103.868	0.464436	117.573	4.29867	11.8214	75.4393	7.57862	8.78645	13.7054	35.0367		2737.85	-113.265	0.351335	4.30775	26.3294	31.1654	87.3929	-0.963361	-3.63433	117.573	30.7042	0.963361
67	WAT-202	WATDE0354	ear 1	ear 1	34.1768	7.50003	4.51792	0.60841		309.772	32.939	0.587539	39.4268	12.1876	16.8751	18.5989	5.07709	1.95193	6.48777	10.9276		1799.24	-33.7112	0.327973	5.7156	48.7502	68.4378	26.2399	-0.855033	-0.492581	39.4268	8.60597	0.855033
68	WAT-202	WATDE0354	ear 2	ear 2	35.4594	12.72	2.81796	0.233922		271.804	23.6344	0.588876	28.485	14.84	20.4934	13.3765	4.87246	1.15327	4.85061	7.87712		697.622	-23.6847	0.362249	4.80033	24.7334	36.7467	18.9404	-0.831479	-0.644539	28.485	6.86114	0.831479
69	WAT-202	WATDE0354	ear 3	ear 3	50.5341	11.4666	4.4727	0.434838		473.45	40.5448	0.468588	48.2325	7.29693	16.6787	28.3614	5.27404	2.43094	7.68763	13.2898		2201.57	-42.6293	0.379938	5.60317	45.8664	75.0541	29.3	-0.88383	-0.567981	48.2325	11.1322	0.88383
70	WAT-202	WATDE0354	ear 4	ear 4	47.2037	11.6412	4.0586	0.385325		512.037	36.3953	0.389295	42.7413	6.79069	19.402	26.303	5.73518	1.87586	6.34598	10.2396		1684.49	-34.1462	0.30314	8.59509	47.5348	64.9966	25.9129	-0.798904	-0.525354	42.7413	7.85524	0.798904
71	WAT-202	WATDE0354	ear 5	ear 5	57.5599	11.358	5.09302	0.446001		527.754	40.936	0.407242	48.8393	8.26034	17.5532	29.9718	5.17959	2.3321	7.90332	12.2058		2088.75	-43.711	0.402617	5.12825	45.4319	73.3106	28.4708	-0.894997	-0.596245	48.8393	11.4628	0.894997
72	WAT-202	WATDE0354	ear 6	ear 6	41.1264	7.71102	5.37008	0.572403		721.082	34.2849	0.390706	42.1915	5.99745	23.9898	29.8851	4.33624	1.42914	7.9066	11.6763		1383.67	-37.946	0.334722	4.24549	41.9822	53.1203	26.003	-0.899376	-0.71434	42.1915	8.70378	0.899376
73	WAT-202	WATDE0354	ear 7	ear 7	50.5586	12.5365	4.06247	0.330096		309.332	31.3032	0.581382	37.8192	7.71478	15.4296	20.1727	4.80407	2.02878	6.51598	11.728		1513.69	-32.9928	0.413369	4.82635	41.4669	67.5043	22.408	-0.872384	-0.488751	37.8192	9.26278	0.872384
74	WAT-325	WATDE0045	ear 1	ear 1	64.2053	12.3852	5.54118	1.02285		1435.26	33.1297	0.164387	48.9338	3.3778	37.1557	38.4441	2.09628	0.891644	15.8041	6.31972		2000.51	-39.5172	0.323314	9.41661	46.1632	61.9262	32.2488	-0.807564	-0.638133	48.9338	10.4265	0.807564
75	WAT-325	WATDE0045	ear 2	ear 2	47.1501	12.582	3.91615	0.290706		617.927	25.5933	0.231443	33.3631	3.1455	24.1155	25.4129	3.29398	1.06128	7.76973	5.88164		1573.4	-29.1636	0.248372	4.19948	57.6675	67.104	23.3755	-0.874128	-0.434603	33.3631	5.80581	0.874128
76	WAT-325	WATDE0045	ear 3	ear 3	66.6957	17.2775	3.9088	0.319629		345.909	37.4213	0.375232	44.9163	5.0816	13.2122	26.1828	4.99282	2.83234	7.49503	9.82465		1832.59	-37.2549	0.297544	7.66144	16.2611	70.1261	26.1349	-0.829429	-0.531256	44.9163	7.77629	0.829429
77	WAT-325	WATDE0045	ear 4	ear 4	47.102	12.2614	3.9142	0.510807		773.052	40.3931	0.286019	48.2388	3.34402	24.5229	31.3724	5.14844	1.64716	7.8457	8.97308		2259.94	-43.492	0.312298	4.74681	62.4218	73.5686	30.6558	-0.901598	-0.591176	48.2388	9.57374	0.901598
78	WAT-325	WATDE0045	ear 5	ear 5	19.6272	3.23956	6.14611	2.72197		466.353	54.7086	0.589439	65.5263	5.39926	14.0381	33.5742	5.05736	3.89716	10.8176	19.79		3554.69	-58.1258	0.302364	7.40046	3.23956	89.6277	39.6226	-0.887061	-0.648525	65.5263	11.9805	0.887061
79	WAT-325	WATDE0045	ear 6	ear 6	55.232	15.9277	3.58847	0.4798		534.336	34.3645	0.304209	43.8278	7.49541	17.8016	29.8477	3.63135	1.93042	9.46329	9.07994		1437.51	-39.2627	0.373506	4.56507	36.5401	59.0264	24.3513	-0.895841	-0.665173	43.8278	9.09535	0.895841
80	WAT-325	WATDE0045	ear 7	ear 7	41.0135	9.81145	4.35158	0.822864		629.961	43.2726	0.327143	53.2036	7.63113	18.5327	33.8571	4.35733	2.33493	9.93098	11.0761		2298.26	-48.4926	0.324731	4.71092	4.36064	79.5817	28.8803	-0.911455	-0.609344	53.2036	9.37833	0.911455
81	WAT-325	WATDE0045	ear 8	ear 8	47.7068	13.999	3.44031	0.254013		996.113	29.0937	0.24743	34.8309	3.49975	37.6223	26.3359	5.07101	0.773309	5.73725	6.5163		715.973	-30.7034	0.472259	4.1275	21.8734	34.9975	20.434	-0.881499	-0.877304	34.8309	9.65012	0.881499
82	WAT-548	WATDE0748	ear 1	ear 1	57.3257	9.99371	6.09335	1.5918		446.706	49.7489	0.322678	68.4394	8.45622	10.7625	41.6432	2.66172	4.62245	18.6905	13.4373		2282.49	-63.8014	0.380826	4.63802	41.5123	55.3498	41.1731	-0.932232	-1.15269	68.4394	15.6798	0.932232
83	WAT-548	WATDE0748	ear 2	ear 2	48.4869	10.2277	4.8169	0.741948		1236.74	54.2344	0.331982	63.7598	6.81849	28.1263	43.7553	5.69371	1.92825	9.52532	14.526		1764.32	-59.9082	0.374997	3.85153	35.7971	46.0248	38.2518	-0.939593	-1.30165	63.7598	14.3443	0.939593
84	WAT-548	WATDE0748	ear 3	ear 3	52.7468	11.0184	5.24214	1.4748		632.89	54.1082	0.288416	73.39	4.23784	12.7135	49.5655	2.80618	4.25596	19.2818	14.2955		2877.98	-67.8506	0.336985	5.53937	43.226	60.1774	47.7089	-0.924521	-1.12751	73.39	16.0772	0.924521
85	WAT-548	WATDE0748	ear 4	ear 4	54.413	12.5344	4.4346	0.570084		453.802	58.2396	0.50505	67.65	6.68504	12.5344	36.3498	6.18889	4.64637	9.41035	18.3585		2534.88	-63.907	0.313277	3.74295	49.3021	57.6584	43.8456	-0.944672	-1.10837	67.65	13.7358	0.944672
86	WAT-548	WATDE0748	ear 5	ear 5	50.8319	11.2084	4.71604	0.772781		618.364	47.0952	0.266169	58.4932	3.44873	15.5193	39.587	4.13187	3.03462	11.398	10.5368		2477.74	-54.8805	0.294909	3.6127	50.8687	58.6284	42.0993	-0.938237	-0.936075	58.4932	12.4155	0.938237
87	WAT-720	WATDE0930	ear 1	ear 1	27.6767	6.65936	4.33464	0.928747		526.838	52.3869	0.526111	61.0641	5.70802	14.2701	36.7911	6.03733	3.67111	8.67717	19.3562		2178.08	-56.961	0.412088	4.10314	35.1995	73.253	29.7703	-0.932806	-0.777593	61.0641	12.268	0.932806
88	WAT-720	WATDE0930	ear 2	ear 2	46.1197	12.083	4.02076	0.772872		314.528	54.5113	0.454854	66.055	6.04147	8.63068	36.6572	4.72217	6.31599	11.5437	16.6737		2019.8	-61.5613	0.442335	4.49374	26.7551	64.7301	31.257	-0.93197	-0.951046	66.055	13.8261	0.93197
89	WAT-720	WATDE0930	ear 3	ear 3	35.4372	13.4524	2.67761	0.36544		160.618	40.9429	0.702514	46.7288	6.27779	8.07145	20.5353	7.07637	5.07256	5.78586	14.4264		1799.47	-42.4103	0.421239	4.31843	43.0477	67.2621	26.7369	-0.907585	-0.630524	46.7288	11.2626	0.907585
90	WAT-720	WATDE0930	ear 4	ear 4	37.3173	12.8703	2.98609	0.442235		299.029	47.3273	0.443157	54.4582	5.1481	9.43819	31.6088	6.6369	5.01444	7.13093	14.0077		1964.61	-49.1384	0.371178	5.31987	30.8886	62.6353	31.3458	-0.902313	-0.784515	54.4582	11.6349	0.902313
91	WAT-720	WATDE0930	ear 5	ear 5	32.1598	14.9354	2.19971	0.315915		381.014	36.9049	0.51835	42.2997	6.63794	14.9354	25.4233	6.8408	2.47097	5.39482	13.1782		1175.25	-38.1246	0.414503	4.17509	22.403	52.2737	22.4944	-0.901297	-0.729326	42.2997	9.32399	0.901297
92	WAT-720	WATDE0930	ear 6	ear 6	42.5634	13.8357	3.16558	0.412697		425.071	47.3502	0.415547	54.7986	3.45894	11.2415	37.3347	6.35704	4.21207	7.44846	15.5143		1836.71	-49.8996	0.418594	4.89898	34.5894	60.5314	30.3361	-0.9106	-0.82436	54.7986	12.6985	0.9106
93	WAT-720	WATDE0930	ear 7	ear 7	46.4757	10.9693	4.47002	0.836628		1027.51	44.0383	0.258383	55.6616	3.98885	23.9331	42.5611	3.78881	1.84006	11.6233	10.9971		2074.04	-49.5504	0.376561	6.11116	42.8801	63.8215	32.4727	-0.890209	-0.776391	55.6616	12.228	0.890209

## Sheet: S9 Thickness Local Extrema
order	Variety ID	GRU code	spike ID	original_ears_ID	NumLocalMaxima	NumLocalMinima	NLE (number of local extremes)	Maxima_Z	Maxima_Thickness	Minima_Z	Minima_Thickness
1	paragon	paragon	ear 1	ear 1	17	16	33	0.892506;5.355015;12.495033;24.097557;27.667564;32.130081;36.592590;40.162598;45.517609;49.087616;54.442635;58.012642;63.367653;67.830162;72.292679;74.077682;80.325195	2.389640;2.556610;4.955600;74.673540;77.893760;76.341770;79.644810;79.547100;77.813210;63.448520;61.658280;57.076170;57.456910;48.966270;45.832370;44.948060;35.943500	2.677509;7.140018;13.387535;24.990059;29.452576;33.915085;38.377594;42.840103;47.302612;51.765129;57.120140;60.690147;66.045158;69.615166;73.185181;78.540192	2.066150;2.124960;4.868100;73.174230;64.760830;70.978960;73.126020;65.618430;63.334960;54.703170;55.020670;46.248100;45.092980;38.845160;44.644890;32.575270
2	paragon	paragon	ear 2	ear 2	15	14	29	1.146481;4.585915;20.636620;24.076054;32.101406;37.833797;45.859150;57.323940;61.909855;65.349285;69.935200;74.521122;82.546467;91.718304;99.743649	3.882380;3.661740;62.277830;58.463150;86.228080;90.716410;84.575060;83.448530;76.127290;74.603750;70.916800;63.872180;56.851940;48.363390;42.273090	3.439438;6.878872;22.929577;25.222534;34.394360;42.419712;51.591541;60.763371;64.202808;68.788723;73.374638;77.960552;88.278866;97.450695	3.228720;1.984070;55.798100;54.431260;79.900810;77.210410;71.424330;73.538530;72.789210;65.144710;61.034630;49.993940;34.847990;37.041200
3	paragon	paragon	ear 3	ear 3	21	20	41	2.196819;5.492046;9.885685;13.180916;23.066605;29.657063;32.952290;37.345928;41.739567;46.133213;50.526852;53.822079;58.215717;61.510944;65.904583;70.298222;74.691860;76.888683;81.282322;83.479145;86.774372	5.127300;5.966830;8.350950;8.943760;101.185210;98.841000;103.485300;91.650260;104.877950;95.347720;99.494610;101.764470;92.993080;86.780010;88.792860;70.558690;65.317580;62.176960;57.432930;57.523330;54.554640	3.295227;7.688866;10.984097;14.279327;25.263424;30.755474;36.247524;38.444340;43.936390;47.231617;51.625256;56.018894;60.412533;63.707767;69.199818;72.495045;75.790272;80.183910;82.380733;85.675961	4.057600;4.239920;8.132130;8.836490;82.133970;96.948080;88.657830;90.962240;90.876250;92.592360;95.003860;87.895490;83.856460;78.522150;67.535400;59.288080;60.780160;55.257970;56.827610;53.509070
4	paragon	paragon	ear 4	ear 4	21	20	41	1.000401;4.001598;11.004398;20.007992;23.009197;26.010395;37.014790;44.017590;47.018787;51.020390;55.021984;61.024387;63.025181;66.026386;71.028385;74.029583;79.031582;82.032772;84.033581;87.034771;94.037579	4.665660;5.237710;34.278240;100.086670;80.401740;99.556690;93.689910;83.452610;86.478020;76.242190;76.208070;65.865980;66.930270;65.788980;60.531260;59.653590;52.472070;46.780860;45.085980;48.419640;22.425040	2.000797;5.001999;12.004795;22.008793;24.009594;31.012394;40.015987;45.017986;49.019588;53.021183;59.023586;62.024784;65.025982;70.027981;73.029179;78.031178;81.032375;83.033184;85.033978;93.037182	4.568350;3.683570;33.354100;78.317430;80.311650;68.747390;63.925790;82.908820;71.956850;71.503100;65.485540;63.009110;63.162400;56.469610;56.980820;50.815580;44.660080;44.896880;44.893560;22.354680
5	paragon	paragon	ear 5	ear 5	16	15	31	1.906361;9.531818;18.110451;23.829544;32.408180;37.174088;40.986816;45.752731;48.612274;52.425003;57.190910;60.050453;65.769547;74.348183;78.160904;85.786362	4.848350;10.602220;93.318390;74.218810;96.797120;101.784620;91.162520;81.303440;80.745410;73.862770;74.892790;72.549470;69.977400;62.165430;53.824120;31.675820	3.812725;11.438179;20.970001;26.689095;34.314545;40.033638;43.846367;47.659088;51.471817;53.378181;59.097275;62.910004;69.582275;77.207733;83.880005	2.123750;8.152640;61.520630;63.034000;93.109570;90.229720;76.838950;79.297980;69.923970;68.653270;69.167420;64.547220;52.009890;49.182270;26.180070
6	paragon	paragon	ear 6	ear 6	16	15	31	0.828136;4.140678;9.937630;15.734589;24.015945;31.469170;33.953583;36.437988;39.750534;43.063080;45.547485;51.344437;53.828850;58.797661;66.250885;73.704109	10.943670;11.386040;48.220540;96.076060;93.568710;72.812240;70.120140;69.956710;65.478190;66.940200;64.990610;55.559180;59.748200;57.457390;47.560190;34.990820	1.656273;5.796951;12.422043;19.875267;28.984764;33.125443;35.609856;38.922394;41.406807;44.719353;48.860031;52.172577;57.141388;64.594612;72.047844	3.588140;5.317200;41.674350;58.700890;60.761560;68.148710;68.136460;64.136050;62.202250;63.443310;50.094990;54.531150;51.507180;40.100140;28.581850
7	paragon	paragon	ear 7	ear 7	19	18	37	0.960716;5.764290;12.489292;20.175014;27.860729;30.742870;37.467876;40.350018;46.114307;49.957172;53.800030;58.603603;62.446461;67.250034;71.092892;74.935757;79.739330;82.621471;89.346478	19.408410;70.960590;116.220390;107.503020;97.024670;95.994020;90.308710;88.313590;78.705600;83.720220;73.687410;76.256650;76.662870;64.924010;58.037300;55.112010;44.850630;49.680330;26.254930	1.921432;8.646435;16.332149;24.978588;29.782162;33.625019;38.428593;43.232166;48.035740;52.839314;56.682171;61.485744;65.328602;70.132175;73.014324;78.778606;80.700039;88.385754	11.202710;22.442070;72.938530;70.044340;91.776800;78.622520;84.545250;69.447070;72.661760;68.082870;62.027220;71.954020;59.211870;57.708930;45.897160;43.478740;41.668820;25.662520
8	paragon	paragon	ear 8	ear 8	19	18	37	3.415096;9.106922;23.905674;27.320770;30.735863;35.289330;40.981155;44.396248;48.949715;53.503174;60.333366;62.610100;70.578659;73.993752;76.270485;79.685577;91.069229;94.484329;109.283081	4.632660;3.877410;87.125740;89.292110;92.767310;92.853240;89.980080;100.398410;104.947220;98.218790;86.199110;86.287890;62.662120;72.679670;71.680680;74.420100;61.387240;47.577000;11.967280	5.691826;10.245289;25.044037;28.459137;33.012596;37.566055;42.119522;46.672981;51.226440;58.056641;61.471733;68.301926;71.717026;75.132118;77.408852;88.792503;93.345963;104.729614	2.057110;3.734350;86.774350;85.462090;84.307050;81.111260;87.417360;91.656520;95.075050;82.346740;84.950880;61.299680;60.184910;71.544180;68.954900;52.351060;46.687460;6.318980
9	WAT-93	WATDE0227	ear 1	ear 1	17	16	33	1.766899;3.533794;10.601387;18.552425;20.319324;25.620014;33.571056;36.221401;41.522099;45.055889;50.356586;54.773830;59.191074;62.724873;68.909008;71.559361;73.326252	3.318450;3.272950;10.584790;34.573140;34.320250;43.139780;37.198980;39.509700;41.431690;43.675280;40.495400;36.335860;33.217330;29.933180;26.792110;28.050300;27.278380	2.650345;4.417244;11.484837;19.435871;22.086224;31.804157;34.454502;37.988300;42.405544;48.589687;53.006931;58.307629;61.841419;66.258663;69.792461;72.442806	3.207290;3.030350;10.215140;32.514080;28.695390;32.269830;36.861830;38.179580;40.424710;36.973160;35.053280;32.950670;28.702400;24.894540;26.729110;27.270380
10	WAT-93	WATDE0227	ear 2	ear 2	17	16	33	1.745686;6.982750;17.456875;25.312473;28.803844;32.295223;36.659443;41.023663;43.642193;46.260723;49.752102;58.480541;61.971912;66.336132;71.573200;75.064571;76.810261	2.923590;4.515400;26.799620;41.487660;40.074860;43.080610;51.022110;45.246300;44.787600;44.544860;41.081110;33.289250;37.161100;31.661760;28.194720;21.023650;22.025140	3.491375;7.855595;19.202564;26.185314;29.676693;34.040913;39.277973;41.896503;44.515034;48.006413;55.862003;59.353382;65.463291;69.827511;74.191731;75.937412	2.705330;4.194450;26.029890;38.224430;39.809850;42.128500;43.263480;44.168740;44.025210;39.615110;27.588000;32.239370;30.164800;25.563150;20.794640;20.728610
11	WAT-93	WATDE0227	ear 3	ear 3	16	15	31	1.764221;9.703213;21.170639;26.463303;29.109634;36.166512;38.812843;43.223389;46.751831;51.162384;55.572929;60.865593;66.158249;70.568802;74.097237;80.272003	3.372220;6.301280;22.004540;27.239580;27.784010;36.735090;38.067800;40.903580;45.759050;42.196530;40.498300;39.740130;36.798440;32.717350;29.436740;20.528260	4.410553;12.349541;22.934860;27.345413;30.873848;37.048622;39.694954;44.987610;49.398163;53.808708;59.101372;63.511917;67.922470;72.333023;79.389908	2.752370;4.465560;19.663360;25.138750;26.849740;36.510360;36.698060;39.384480;38.967690;34.844890;33.842010;34.078800;29.435420;28.109870;20.461720
12	WAT-93	WATDE0227	ear 4	ear 4	18	17	35	2.706917;18.948429;22.557659;27.069187;28.873798;34.287640;37.896862;45.115314;47.822231;51.431454;53.236073;55.942989;60.454517;62.259129;64.966053;69.477581;73.989117;83.012173	3.312720;31.767440;31.390810;37.479930;37.731100;38.763540;40.723200;36.182480;38.639370;38.338100;37.259420;37.446050;29.324150;28.966810;30.241520;26.574750;27.905910;17.599190	3.609222;20.753040;23.459965;27.971493;32.483028;35.189945;41.506084;46.017620;49.626843;52.333759;55.040684;59.552212;61.356823;63.161442;68.575275;72.184498;82.109875	2.976450;29.176150;30.462780;36.813480;31.149270;37.098820;33.356110;36.149770;34.561100;36.901020;35.984560;28.791820;28.252730;27.390410;25.761340;25.125510;17.573600
13	WAT-93	WATDE0227	ear 5	ear 5	17	16	33	2.918144;11.672573;21.399712;29.181427;39.881287;41.826714;44.744858;49.608429;54.472000;59.335571;64.199142;66.144569;69.062714;78.789856;83.653419;88.516991;91.435143	6.645250;52.170300;63.780470;63.541400;61.181100;60.274520;56.828490;55.452160;50.817250;44.669600;39.718200;38.404360;37.895060;27.564700;23.831250;19.024090;19.601340	3.890858;16.536144;25.290573;34.044998;40.853996;43.772140;48.635712;53.499283;58.362854;63.226425;65.171852;68.089996;77.817139;82.680717;87.544289;89.489708	6.113910;35.830690;44.229420;49.130370;60.040100;53.504040;51.058220;49.418240;43.505470;37.658030;38.265580;37.464710;26.459340;23.347030;18.993080;18.825100
14	WAT-93	WATDE0227	ear 6	ear 6	18	17	35	2.943188;16.678070;19.621258;23.545513;28.450825;30.412952;36.299328;45.128895;47.091022;53.958462;57.882717;62.788029;66.712284;72.598660;77.503971;80.447163;82.409290;86.333546	4.500060;30.877090;39.194090;37.063830;46.533460;47.692820;54.831160;50.800310;49.819250;47.012870;43.164880;41.407950;37.651490;30.260090;35.259820;35.461870;35.639070;35.836370	4.905315;17.659134;22.564449;24.526577;29.431889;32.375080;42.185711;46.109959;51.996334;56.901653;60.825901;65.731220;70.636532;73.579723;79.466099;81.428226;84.371418	3.652120;30.226060;36.564850;36.744520;44.824070;45.532140;33.387270;48.569670;40.346370;40.005480;38.072890;36.343470;29.076640;28.506380;33.215960;35.379080;31.231110
15	WAT-93	WATDE0227	ear 7	ear 7	16	15	31	2.666599;6.222061;14.221851;22.221638;29.332561;31.999165;36.443485;39.110088;47.109875;48.887608;54.220798;60.442860;62.220593;68.442646;73.775845;76.442440	3.925950;5.125130;25.660500;44.600990;43.164380;45.365580;39.757040;40.863130;41.284840;41.111210;32.401320;32.570760;32.556990;27.323330;26.553020;26.731070	4.444328;7.110928;15.110714;25.777103;30.221432;34.665760;37.332355;42.665546;47.998737;53.331936;56.887394;61.331722;66.664921;71.998112;75.553570	3.644900;4.992420;24.457770;35.731490;43.102950;37.627060;39.581960;35.861310;40.698870;31.741710;30.751740;31.796470;26.616580;24.620810;25.500960
16	WAT-93	WATDE0227	ear 8	ear 8	16	16	32	5.122200;14.342155;23.562111;28.684311;30.733192;38.928711;45.075348;49.173111;53.270866;57.368629;66.588585;71.710785;74.784103;76.832985;78.881859;93.224022	4.288240;40.692770;55.362680;47.832280;48.381360;49.834900;42.448760;46.741430;49.466910;46.041650;36.848940;35.886080;31.725460;30.707740;30.567210;28.946260	2.048882;6.146637;16.391037;26.635437;29.708755;35.855392;43.026466;46.099792;52.246429;56.344185;62.490822;70.686340;73.759666;75.808540;77.857422;87.077385	2.835940;2.256420;33.619160;43.778580;47.428090;44.542100;37.800490;41.628360;43.416020;45.325320;32.052120;34.345960;30.358670;29.889680;30.419460;20.533000
17	WAT-93	WATDE0227	ear 9	ear 9	15	14	29	1.943306;8.744881;16.518112;24.291336;32.064560;39.837791;44.696060;48.582672;52.469284;56.355896;64.129128;67.044083;72.874008;80.647240;87.448799	11.019800;18.547420;78.112290;77.621490;82.789330;74.634000;59.534560;64.639860;67.605820;64.790630;47.331670;44.593450;40.206480;30.568410;29.329010	4.858269;10.688187;19.433067;28.177948;34.979523;43.724403;45.667709;50.525978;54.412590;63.157471;66.072433;69.959045;77.732277;82.590538	6.238310;14.883500;53.595960;67.630250;61.433080;58.956570;59.100510;59.643810;59.803970;45.546080;44.105490;38.431140;28.390530;25.966400
18	WAT-94	WATDE0228	ear 1	ear 1	15	15	30	3.387829;6.775658;13.551315;20.326973;34.725243;37.266113;41.500893;45.735680;49.123505;53.358292;57.593079;60.980904;69.450478;71.144394;76.226135	4.103560;6.035300;17.406950;36.659950;41.715760;40.865140;35.551020;37.087320;35.914820;32.451070;32.663220;35.491330;31.927260;28.844220;21.124710	0.846958;4.234787;7.622616;14.398270;23.714798;35.572197;39.806984;43.194809;48.276550;51.664383;55.052208;58.440033;66.062653;70.297432;75.379181	2.391350;3.612860;5.640190;16.960970;28.290060;40.084720;34.034350;32.742290;35.252980;31.402780;28.969250;29.793650;26.423340;28.836480;20.539900
19	WAT-94	WATDE0228	ear 2	ear 2	17	16	33	3.477699;6.955399;20.866196;24.343895;28.691017;31.299286;36.515839;39.124107;43.471237;46.948936;51.296059;54.773758;63.468002;66.076279;69.553978;73.901093;78.248215	3.820410;5.927290;35.144580;32.434940;39.518550;38.851330;39.066340;39.163810;41.814960;41.258490;39.529330;36.535530;33.133110;32.314460;28.864950;27.474450;26.077940	4.347122;7.824821;22.605042;25.213318;30.429863;33.907562;37.385262;40.862961;45.210083;49.557205;53.034904;60.859726;64.337425;68.684547;73.031670;77.378799	3.664580;5.368330;32.126050;32.231730;38.468200;35.184310;37.914800;37.282880;39.036150;36.893930;34.292060;28.499500;30.954790;28.094800;25.301460;25.656950
20	WAT-94	WATDE0228	ear 3	ear 3	18	17	35	3.288582;12.058132;16.442905;20.827683;25.212460;29.597233;33.982006;38.366779;42.751560;47.136333;51.521107;55.905880;64.675434;67.964016;72.348789;77.829762;81.118343;98.657436	8.084750;28.772770;36.811590;40.680510;39.774550;46.206240;46.888640;46.717530;44.724370;47.343770;48.868070;48.304920;45.461820;43.745010;41.487040;47.273570;45.281250;26.639900	4.384773;13.154324;18.635296;23.020069;26.308651;31.789623;36.174397;40.559170;44.943943;48.232525;53.713497;61.386852;66.867825;71.252598;74.541180;80.022144;96.465054	7.288970;28.452120;35.630100;36.924020;39.273680;43.899000;44.830240;43.050190;42.109170;45.348890;45.662870;41.764650;42.198220;40.823390;39.123070;45.194250;24.285700
21	WAT-94	WATDE0228	ear 4	ear 4	15	14	29	2.413258;20.110504;22.523766;25.741440;29.763542;32.981224;36.198906;41.025421;48.265205;52.287308;56.309410;60.331505;63.549187;67.571289;71.593391	2.923950;32.800130;34.005760;32.866160;37.807300;40.137250;39.576070;40.327590;33.493930;32.017330;31.350580;28.613830;25.732570;23.360220;22.465990	3.217678;20.914925;24.132599;26.545860;30.567963;35.394485;39.416588;46.656364;50.678467;53.896149;58.722664;62.744766;66.766869;69.984550	2.341220;32.583730;31.178370;32.095470;37.057530;37.120850;37.355190;30.976680;29.791140;28.659100;27.177320;24.977690;22.727550;21.661570
22	WAT-94	WATDE0228	ear 5	ear 5	17	16	33	2.923054;16.563961;19.487011;24.358768;27.281818;32.153568;38.974026;43.845776;47.743175;52.614933;55.537983;60.409733;64.307133;68.204540;79.896748;83.794147;87.691547	7.421400;39.089050;43.129630;48.370120;48.734330;55.770220;48.720270;50.956780;49.749360;48.053790;47.566320;44.860270;50.769220;52.074350;27.196500;25.210110;26.110940	3.897404;17.538311;21.435711;26.307468;29.230518;37.999676;41.897076;45.794476;49.691875;53.589283;57.486683;61.384083;65.281483;78.922390;81.845448;85.742847	7.198620;38.026290;41.418550;47.018500;46.415190;48.270390;44.349780;48.171090;44.312570;45.077240;43.164150;43.760430;48.076940;26.507350;23.952040;23.171460
23	WAT-94	WATDE0228	ear 6	ear 6	18	17	35	1.863140;13.973534;17.699810;20.494518;24.220791;28.878635;32.604916;37.262760;40.057468;44.715313;48.441586;53.099430;56.825703;64.278255;68.936100;73.593945;77.320225;81.978062	4.570960;21.567680;31.340850;36.865730;39.665910;38.691710;39.832940;43.589240;44.389860;46.060780;44.527250;39.364630;40.114320;29.830200;29.590560;28.479800;23.718750;20.272920	3.726276;14.905102;18.631382;22.357655;27.015499;29.810207;34.468052;38.194324;42.852169;46.578449;51.236294;54.962566;63.346691;67.072964;71.730808;76.388653;80.114933	3.727740;20.770150;31.268070;36.388140;36.570810;36.494860;37.888800;41.624040;40.545140;43.569250;36.833600;36.978190;29.618790;27.959020;26.698980;23.320300;20.034940
24	WAT-94	WATDE0228	ear 7	ear 7	19	18	37	2.580818;6.882187;18.065739;21.506832;24.947926;28.389019;32.690388;35.271214;38.712307;43.013668;47.315037;50.756130;58.498592;61.939686;64.520504;66.241055;70.542423;73.123241;80.865696	3.909260;6.590070;27.828000;30.756520;35.040040;35.759040;40.350330;41.573890;40.130260;38.926430;39.855700;38.258200;29.419070;28.918620;27.333790;27.542160;30.376410;29.174130;14.653280	4.301365;7.742458;18.926014;22.367107;26.668476;29.249294;33.550663;37.852032;41.293125;44.734219;49.035587;56.778049;60.219143;63.660236;65.380779;67.961597;72.262966;80.005436	3.770100;6.482990;27.709420;30.198870;33.754720;34.653500;39.879540;39.763510;35.884320;37.032390;35.903210;27.633630;27.483200;27.106110;27.019500;25.096190;29.170410;14.506590
25	WAT-94	WATDE0228	ear 8	ear 8	17	17	34	3.417755;14.525463;17.088779;23.924290;28.196484;31.614239;35.032001;40.158634;42.721951;46.994144;50.411900;53.829655;62.374043;65.791805;69.209560;73.481747;77.753948	5.240810;41.542120;42.760200;50.913020;48.593570;47.461730;44.320340;47.968210;46.129410;44.990650;44.701290;43.106170;32.739220;29.358150;25.430270;30.398020;33.192480	0.854439;4.272194;15.379902;18.797657;26.487606;29.905361;34.177555;37.595318;41.867512;45.285267;49.557461;52.120777;60.665165;64.937366;68.355122;70.918438;74.336193	3.066270;5.012570;39.925180;40.701170;45.676900;45.332120;44.010300;42.010340;45.561450;40.777710;41.994290;41.042240;30.761510;29.009580;25.067480;24.278290;29.376160
26	WAT-94	WATDE0228	ear 9	ear 9	18	17	35	3.157112;16.837933;25.256901;28.414013;33.675869;36.832981;41.042461;45.251949;49.461430;52.618542;54.723286;63.142254;67.351734;70.508854;77.875446;82.084934;91.556271;94.713375	8.435420;47.195290;48.745550;46.171500;47.184600;51.109590;50.199290;54.424290;50.036210;47.183700;47.663490;45.329980;49.929850;51.373980;38.120650;36.307820;28.817100;29.652130	4.209484;22.099789;27.361645;30.518757;34.728237;38.937725;42.094837;48.409061;51.566174;53.670918;59.985142;64.194622;68.404110;76.823078;81.032558;89.451534;92.608639	7.954880;40.460510;45.868150;40.028550;45.976610;48.378520;48.617380;49.412940;46.640040;46.855390;41.322440;42.392680;48.724480;37.383750;36.225420;24.170620;27.593880
27	WAT-117	WATDE0253	ear 1	ear 1	19	18	37	2.752644;10.093029;18.350956;22.021152;27.526440;31.196629;36.701916;41.289654;45.877399;50.465137;55.970425;59.640614;61.475712;65.145901;70.651188;75.238934;77.074032;80.744213;88.084606	7.758910;53.378030;63.493010;59.623260;65.656030;60.757070;63.038810;57.435470;50.461850;48.851070;50.010050;46.052280;45.193220;39.501710;40.970130;30.005620;26.958100;25.201740;12.819730	4.587738;13.763218;20.186054;23.856243;29.361538;33.949276;38.537014;44.042301;48.630039;53.217777;58.723064;60.558163;64.228359;67.898548;73.403835;76.156475;79.826672;86.249508	6.116230;34.568170;53.068580;49.192790;54.377410;50.286040;49.371480;44.226710;41.146020;39.794530;41.710930;44.920860;35.341650;32.536300;26.085950;26.738050;24.522200;11.186040
28	WAT-117	WATDE0253	ear 2	ear 2	19	18	37	2.173973;5.434929;20.652733;23.913692;29.348621;32.609577;36.957516;42.392452;46.740391;51.088337;56.523266;60.871204;66.306133;70.654079;76.089008;80.436954;85.871876;92.393803;97.828724	2.769730;4.672650;46.479680;53.666310;67.537400;66.029860;54.820000;57.044800;62.009560;55.245830;59.556590;58.327060;45.071000;48.570050;40.708030;33.607610;27.752190;27.671420;22.979450	3.260960;6.521915;21.739719;26.087658;30.435604;34.783550;39.131489;44.566418;48.914364;53.262310;58.697239;65.219151;68.480106;73.915035;79.349964;84.784893;88.045856;95.654758	2.489750;4.202140;44.162090;51.102590;59.717380;49.041550;47.347410;44.420990;50.523060;44.338890;48.382520;42.585780;38.853080;37.302210;30.354120;26.479300;24.053210;21.510640
29	WAT-117	WATDE0253	ear 3	ear 3	15	14	29	1.846100;14.768795;20.307095;23.999294;28.614544;32.306744;37.845043;42.460293;47.075535;51.690784;56.306034;67.382633;71.997883;73.843983;77.536182	3.386530;39.749580;48.453410;57.655390;54.347090;58.080950;56.898560;51.687760;49.100000;46.643320;40.719480;31.947380;30.070140;29.397350;29.170990	2.769150;17.537945;21.230145;26.768444;30.460644;35.075893;40.614193;45.229443;49.844685;55.382984;65.536533;70.151783;72.920933;76.613132	3.021520;31.592760;46.549440;48.178370;46.147030;47.517110;43.923000;41.530940;38.697000;36.978820;24.820410;28.287020;29.191910;26.854470
30	WAT-117	WATDE0253	ear 4	ear 4	18	17	35	2.771320;5.542641;12.009056;15.704147;21.246788;24.941887;30.484528;35.103394;39.722260;44.341125;48.959999;53.578865;59.121506;63.740372;69.283012;74.825653;80.368301;82.215851	4.566830;6.061440;50.370100;46.228500;59.988730;60.794200;60.068490;55.506430;52.671210;52.350530;49.831600;45.703920;41.876910;37.782050;33.744020;32.446100;27.744740;26.307370	3.695091;6.466415;14.780373;18.475471;23.094337;27.713203;32.332069;36.950943;42.493584;47.112450;51.731316;57.273956;62.816597;68.359238;72.978111;78.520752;81.292068	4.387800;5.810550;45.671730;40.016350;52.617260;46.626830;46.995580;43.448390;41.979570;40.795800;42.136000;34.993890;35.288950;29.975520;28.265140;26.693500;25.384060
31	WAT-117	WATDE0253	ear 5	ear 5	16	15	31	0.882389;2.647163;7.059105;14.118210;22.059700;30.883583;34.413132;38.825073;45.001785;49.413727;54.708054;57.355217;63.531937;74.120590;80.297302;82.944473	4.908290;4.229760;10.900830;69.064010;68.813750;67.405170;59.610920;50.713480;51.615510;46.006820;48.858920;39.457130;43.486480;44.670640;14.780950;14.060220	1.764774;3.529552;8.823883;18.530151;27.354027;33.530746;37.060295;42.354622;46.766563;51.178505;56.472832;60.884773;68.826263;79.414917;82.062088	4.153270;4.197970;10.372990;42.711540;52.447720;57.233730;43.742330;41.274330;42.426780;40.417440;38.488480;31.280410;26.158030;14.155300;14.002140
32	WAT-117	WATDE0253	ear 6	ear 6	19	18	37	1.729034;3.458069;10.374210;12.967770;17.290356;19.019390;24.206501;28.529087;31.987164;33.716198;37.174267;41.496861;47.548489;56.193661;61.380772;65.703358;72.619503;76.077572;82.993725	4.908880;5.520930;37.299700;35.847990;60.862640;54.360570;65.340370;55.522610;51.408570;51.396010;50.315540;46.085250;46.622080;41.763370;33.829330;32.592600;24.879230;23.534120;8.782620	2.593552;5.187107;12.103252;13.832287;18.154873;21.612949;26.800053;30.258129;32.851681;35.445232;39.767826;44.954929;54.464626;59.651737;64.838840;71.754986;75.213055;81.264690	4.847480;4.021300;33.264520;34.486830;53.847190;44.047880;48.479090;46.627010;51.358020;45.881010;39.819690;37.570980;35.031600;31.896060;31.536050;24.455140;21.599370;8.604250
33	WAT-117	WATDE0253	ear 7	ear 7	16	15	31	3.354103;10.062313;12.577885;18.447567;26.832821;29.348400;33.541027;35.218082;39.410709;44.441860;48.634495;53.665646;58.696796;62.889431;68.759106;79.659939	4.627220;24.361820;27.058000;55.501780;54.055450;54.109280;52.428670;52.520220;53.570620;46.901540;43.480820;40.768250;40.332350;33.798690;29.402890;10.238560	5.031155;10.900837;13.416416;23.478718;28.509876;31.863979;34.379551;36.895130;41.926289;46.118916;51.988590;56.181225;62.050899;67.920582;78.821423	3.949360;24.242770;22.916760;36.183880;50.075780;44.452580;52.238360;43.688300;40.203710;36.472450;36.297220;32.457510;30.112590;28.558390;9.850460
34	WAT-149	WATDE0020	ear 1	ear 1	18	17	35	0.935333;3.741329;6.547321;12.159309;21.512627;29.930611;33.671936;35.542595;42.089920;44.895912;48.637238;57.055222;59.861214;63.602539;68.279198;73.891190;75.761848;81.373840	3.103430;3.690980;4.343040;8.268090;45.842390;71.829800;83.157330;80.133110;79.922520;77.046460;84.675440;73.809650;69.770410;73.789100;65.652550;64.359210;64.877610;53.015670	1.870667;4.676659;9.353317;13.094643;23.383286;31.801270;34.607269;39.283920;43.960579;45.831245;54.249229;58.925888;60.796547;67.343872;70.149864;74.826523;80.438507	2.492590;3.178660;3.862770;7.422690;38.568970;69.535660;79.786980;67.831010;71.801040;76.871440;62.256660;69.101400;66.905320;64.762230;62.237840;63.744030;51.423680
35	WAT-149	WATDE0020	ear 2	ear 2	17	17	34	6.673615;22.523453;25.026062;30.031273;34.202286;37.539093;39.207497;40.875900;44.212708;47.549515;49.217918;53.388931;55.891541;58.394142;60.896751;64.233559;67.570366	6.593090;68.148400;70.067070;79.101260;80.072820;82.586860;83.193120;85.520190;87.569140;82.181930;81.064700;81.391600;83.135230;83.451710;82.066950;81.861970;77.355520	0.834202;9.176220;24.191856;27.528664;31.699677;35.870689;38.373291;40.041695;41.710106;46.715317;48.383720;50.886322;54.223137;56.725739;60.062546;62.565155;66.736168	1.480940;3.625700;66.729160;66.013550;73.790160;78.315870;82.078490;82.839050;82.813920;81.917670;80.992190;78.216060;80.064100;79.679290;79.648600;80.066660;77.330600
36	WAT-149	WATDE0020	ear 3	ear 3	18	18	36	3.511070;7.022144;10.533218;21.944206;28.966354;33.355194;36.866272;40.377342;43.888412;47.399490;51.788330;54.421638;58.810478;60.566017;64.077087;66.710396;69.343697;71.977005	2.516900;2.976390;4.732600;41.686390;62.040810;70.253630;71.473510;74.464120;71.603570;67.937850;69.524340;68.327580;66.970220;68.293340;68.024630;67.690620;63.826650;62.371400	0.877766;5.266609;8.777683;13.166523;22.821976;30.721893;34.232964;37.744034;42.132881;45.643951;49.155029;52.666100;56.177170;59.688248;62.321548;64.954857;68.465927;71.099236	1.322760;1.941150;2.936430;3.462610;41.386260;58.942260;67.086040;66.700940;69.165150;64.698250;64.112440;66.326210;65.368840;66.765620;66.531030;63.556870;62.895890;62.253730
37	WAT-149	WATDE0020	ear 4	ear 4	14	14	28	3.983810;9.295563;11.951439;24.566849;28.550667;30.542572;33.862419;36.518295;39.838135;41.166077;45.813858;47.805763;50.461639;57.101334	1.984110;2.661670;3.514990;67.882000;80.966670;84.451610;98.094760;81.208430;88.220730;88.825510;80.023260;74.012520;87.322250;64.492710	1.327938;5.975719;9.959534;12.615410;25.230820;29.214630;31.206543;35.854324;38.510201;40.502106;44.485916;47.141792;48.469734;54.445457	1.106100;1.074350;2.189380;2.242340;67.273690;78.779500;81.912540;77.260740;76.940720;86.892540;76.058160;72.874170;73.910950;61.344320
38	WAT-149	WATDE0020	ear 5	ear 5	18	17	35	0.726345;3.631718;5.084404;8.716122;23.969334;27.601048;29.780079;31.959110;36.317173;37.769855;41.401577;45.033291;47.938663;49.391354;51.570377;54.475758;58.833813;65.370907	3.071850;3.495580;3.280880;6.423460;94.694110;99.896100;92.747440;91.415100;108.138510;110.829320;100.605610;103.097720;95.919900;94.988200;99.554050;97.748900;102.695000;73.465040	1.452690;4.358063;6.537090;10.895153;24.695675;28.327396;31.232769;32.685452;37.043514;40.675228;43.580601;47.212322;48.665005;50.117695;53.749409;55.928440;63.191875	2.493720;3.074910;3.077910;4.466730;88.656340;87.326780;90.558240;90.472790;107.578420;100.183920;95.913330;95.082500;94.696110;93.282900;95.058280;95.689130;66.448160
39	WAT-149	WATDE0020	ear 6	ear 6	13	12	25	3.404556;6.809113;11.575489;15.660961;23.831890;29.960094;33.364651;36.769207;40.173763;42.216496;48.344700;56.515636;63.324749	2.066040;2.103940;4.324870;5.608270;33.941470;64.207860;73.619750;71.053950;69.878290;69.478960;71.239940;56.573800;38.575620	4.085468;8.170933;12.937313;16.341869;24.512806;31.321918;34.726475;38.131031;41.535587;44.259228;54.472897;62.643833	1.099550;1.198790;2.678660;4.896470;31.417590;61.767380;67.739230;61.839020;68.675130;65.608030;49.087050;38.233590
40	WAT-149	WATDE0020	ear 7	ear 7	13	12	25	2.581829;7.100025;14.845509;23.881901;27.109180;30.336468;32.918293;36.791035;40.018314;41.954685;43.245602;48.409252;54.218365	2.401760;2.846310;7.759100;49.579940;70.164120;77.254200;76.992630;78.182570;69.555680;68.778320;69.433960;59.125420;57.022060	3.227283;8.390934;16.781872;24.527355;27.754642;31.627377;34.854664;39.372860;40.663776;42.600140;47.763798;51.636539	1.310440;1.245460;6.704260;46.713070;69.633160;74.343490;67.798090;69.430780;65.148550;68.561050;58.769980;53.254800
41	WAT-156	WATDE0296	ear 1	ear 2	16	15	31	6.563656;13.947773;16.409145;22.972805;26.254635;29.536465;32.818295;37.741039;41.022869;43.484241;48.406986;54.150188;55.791103;58.252476;62.354763;66.457050	13.375760;89.511630;86.933750;115.575980;123.431610;122.655320;112.046780;113.877630;112.018830;97.677310;88.076630;90.380910;91.055870;81.425620;59.929100;49.626350	7.384113;14.768230;17.229603;24.613720;27.895550;31.177380;34.459209;39.381954;42.663784;47.586529;50.047901;54.970646;57.432018;61.534306;64.816135	13.268180;83.797960;81.615540;111.657200;116.928760;104.619650;107.617770;105.412620;93.661960;87.931340;82.950490;89.821220;80.367660;59.389350;43.783730
42	WAT-156	WATDE0296	ear 2	ear 3	17	16	33	0.897141;5.382839;10.765678;20.634220;25.119923;28.708485;34.988461;38.577023;43.959866;48.445568;53.828403;58.314106;62.799809;68.182644;72.668346;78.051189;84.331165	2.029290;3.274130;5.595930;55.227410;67.768220;70.475290;69.100150;70.493090;66.932590;66.700660;53.216760;54.873670;52.763830;44.674250;41.183110;32.352870;13.321580	1.794277;8.074261;11.662819;22.428501;26.914204;32.297039;36.782742;41.268444;45.754147;52.034122;56.519825;61.005528;66.388363;70.874065;76.256908;83.434025	1.431100;2.916350;5.291330;54.608320;62.536260;53.858610;59.429580;52.116190;56.572710;47.911590;40.628230;46.673550;39.377140;36.426230;31.086650;12.782330
43	WAT-156	WATDE0296	ear 3	ear 4	17	16	33	1.592484;3.981213;10.351151;15.924850;19.109818;23.091034;27.072243;29.460968;34.238426;36.627151;41.404610;44.589577;47.774544;53.348244;58.125702;59.718185;69.273094	3.046350;3.711060;8.509940;66.867160;67.724480;95.385180;93.874460;98.440160;99.077790;90.607480;97.463680;90.558300;80.390340;69.824100;71.574080;70.574780;41.419280	2.388729;5.573696;11.147392;17.517334;19.906059;24.683517;27.868485;32.645943;35.830910;37.423393;43.793335;46.978302;50.959518;54.940727;58.921944;66.884369	2.620490;3.235580;8.313820;61.370820;65.791080;89.527790;89.536680;88.662910;89.949470;88.994090;89.575610;77.810930;62.802110;63.185990;67.015500;36.083040
44	WAT-156	WATDE0296	ear 4	ear 5	17	16	33	2.228683;5.200260;18.572353;21.543934;26.001293;28.972874;31.944447;34.916027;38.630497;42.344967;43.830753;46.059437;49.773907;52.745487;57.202847;60.174427;63.888897	3.622160;4.841520;85.888980;80.392350;86.028440;92.241320;89.782300;82.450920;76.758550;73.060630;72.762050;77.096780;69.918360;64.611460;61.337210;56.667560;51.537770	2.971577;5.943157;20.058140;23.029720;26.744190;30.458660;33.430233;37.144711;40.116283;43.087856;44.573650;47.545223;51.259693;54.974163;58.688633;62.403111	3.063720;4.632240;74.395190;71.618370;85.850640;86.643530;78.812600;70.049780;69.594740;72.193910;71.440110;68.664930;60.010930;55.788710;50.566210;47.385600
45	WAT-156	WATDE0296	ear 5	ear 6	17	16	33	2.379837;11.899185;21.418533;25.384933;29.351326;31.731163;34.904282;38.870674;42.837067;46.803467;49.183304;53.942978;57.116089;61.082489;65.048882;69.015274;73.774948	8.427580;57.210060;94.523200;101.033480;108.975760;104.761910;102.627810;96.135090;88.530180;92.637620;82.363220;78.426580;75.070380;68.769070;57.849130;50.205910;21.908580	3.173119;12.692467;22.211815;26.178207;30.937881;33.317719;38.077393;41.250511;44.423630;48.390022;53.149696;55.529533;59.495926;63.462326;68.222000;72.981674	8.051440;53.235060;93.595260;98.106320;102.289160;95.266780;95.017690;81.973710;82.750900;80.529910;76.920950;71.210240;67.324610;56.799610;47.314350;21.600810
46	WAT-156	WATDE0296	ear 6	ear 7	18	17	35	4.930870;13.806435;23.668175;30.571388;34.516083;38.460777;43.391647;48.322517;53.253387;57.198082;60.156601;62.128952;66.073647;71.004517;75.935379;80.866257;84.810944;86.783295	9.694230;99.245230;86.964090;88.682950;90.375730;91.023920;81.466010;75.465670;84.407730;79.552260;74.761950;76.339620;60.368100;59.372620;47.474390;43.811790;36.162830;36.070620	6.903217;17.751129;27.612869;32.543739;36.488434;41.419296;46.350166;50.294861;55.225731;59.170425;61.142776;64.101295;68.045990;73.963036;78.893906;83.824768;85.797119	8.053050;52.630590;65.786270;84.886880;77.403520;75.531890;63.859190;71.411360;71.458640;71.315390;74.595200;57.203030;50.971760;46.419880;37.671850;35.077840;36.005510
47	WAT-156	WATDE0296	ear 7	ear 8	15	14	29	12.636230;16.848305;25.272461;27.799713;32.011787;36.223862;39.593529;41.278358;44.648018;49.702515;53.914589;58.126671;62.338745;66.550827;71.605316	52.853670;53.752780;103.192410;99.747710;94.395750;98.189440;94.632780;95.439750;85.729340;78.422500;81.285460;73.155710;73.934930;72.297080;77.786020	15.163475;17.690727;26.957298;30.326958;34.539032;37.908699;40.435944;43.805603;48.017685;51.387344;56.441834;59.811501;64.023575;68.235657	43.055970;52.250890;96.142180;89.672350;86.642560;89.734160;93.849610;84.846170;73.078600;67.304710;66.597350;65.633540;67.555960;59.695220
48	WAT-156	WATDE0296	ear 8	ear 9	16	15	31	1.660133;10.790882;17.431423;24.902035;26.562176;34.032787;39.013195;43.993603;46.483807;51.464214;59.764889;63.085163;66.405437;71.385845;73.045979;78.026386	3.539730;12.704460;84.065380;88.932520;87.721520;91.254900;74.399100;78.958970;72.098690;79.136960;67.646250;60.682720;50.591120;26.989730;26.762410;15.813200	3.320271;11.620953;21.581768;25.732105;29.052380;37.353054;40.673328;45.653736;48.974010;57.274685;62.255093;65.575367;70.555775;72.215908;77.196323	1.917620;11.119900;61.221190;86.243600;67.202710;68.418070;65.590790;70.521530;62.552100;54.219800;58.139430;50.577590;25.936290;26.189490;14.924450
49	WAT-176	WATDE0323	ear 1	ear 1	13	12	25	9.282127;11.466164;13.650192;15.288216;20.202286;22.386322;25.116356;28.392403;33.306473;34.398491;36.036514;38.766556;42.588608	103.391430;108.901630;118.813000;115.461380;135.363800;135.961850;135.244420;134.357300;104.607760;103.689480;101.496350;104.463310;90.940710	10.374146;12.012169;14.742210;16.380234;20.748299;24.024345;27.300392;32.760468;33.852486;35.490509;37.128532;42.042603	102.365850;108.453440;115.200540;111.567030;131.098710;130.837390;130.822300;104.243750;102.475440;100.748870;99.955070;90.548210
51	WAT-176	WATDE0323	ear 2	ear 3	7	6	13	14.016975;19.333763;22.233826;23.683861;26.100578;29.967331;34.317429	89.857050;118.956540;120.162990;119.692160;116.944210;111.260150;124.577510	14.500320;20.783791;23.200516;25.133888;28.517296;30.934021	88.743610;114.646490;117.860500;113.550900;104.244420;105.609290
52	WAT-176	WATDE0323	ear 3	ear 4	8	7	15	8.089584;15.280327;16.628593;19.325119;22.920494;23.819336;27.414711;31.459503	94.096680;149.965730;156.250750;168.020160;156.550460;156.918430;132.338080;133.381400	9.437851;15.729752;17.527435;22.021652;23.369911;26.965286;28.313553	87.658660;147.919260;149.348600;151.412140;155.377880;131.759970;124.853770
53	WAT-176	WATDE0323	ear 4	ear 5	11	10	21	10.646088;13.549568;14.517395;16.453049;18.388702;20.808266;22.260010;24.679573;27.583054;29.034798;32.906097	122.241290;144.496300;144.022220;153.216610;163.650060;166.416000;164.419890;169.180260;150.243510;145.580070;144.143100	11.130005;14.033485;15.001312;16.936966;19.840439;21.292183;23.227837;27.099144;28.550880;30.486534	121.596700;142.483900;142.131000;149.357630;156.996380;160.965190;163.524280;148.072470;145.248520;134.834270
54	WAT-176	WATDE0323	ear 5	ear 6	10	9	19	11.719490;15.000946;15.938499;20.157516;22.501419;24.845314;25.782875;30.001892;33.752129;37.033585	136.352310;137.619270;140.862390;144.121320;163.164400;156.629360;156.741730;135.882310;122.156640;109.468380	14.063385;15.469727;17.344841;20.626297;23.907753;25.314095;29.064331;32.814568;36.564804	126.855760;136.540690;134.730500;143.684190;150.633660;153.799790;131.596200;121.890920;107.746990
55	WAT-176	WATDE0323	ear 6	ear 7	9	8	17	12.247429;13.559654;18.371147;19.245964;24.057457;26.244499;27.119316;29.306358;33.243027	126.888280;128.637180;149.325780;149.629100;141.310000;134.106190;130.795040;122.253950;95.118070	13.122246;14.871880;18.808556;21.870415;25.369682;26.681908;28.431541;32.805618	125.494590;125.331980;147.555740;134.265270;129.047160;129.945670;120.442480;94.411940
56	WAT-176	WATDE0323	ear 7	ear 8	8	7	15	11.636993;14.130638;16.624275;17.455490;20.364738;22.858376;24.520805;29.923691	123.509600;123.815410;130.782360;131.569280;128.039480;119.694990;131.277160;99.284190	12.883812;14.546242;17.039879;19.117920;22.027161;23.273987;29.092484	119.731390;122.748630;129.570100;124.553640;118.014790;119.433740;96.129550
57	WAT-176	WATDE0323	ear 8	ear 9	12	11	23	0.437675;17.069328;17.944679;19.257698;20.133049;22.759102;26.260498;28.448875;29.761902;32.825623;35.451675;36.327026	4.961820;139.248410;137.756980;139.398360;136.587200;130.555970;130.713630;121.935700;125.839790;105.550730;88.131380;88.830020	0.875351;17.507004;18.382355;19.695374;21.883751;24.947472;28.011200;28.886551;31.950272;34.576324;35.889351	4.842370;137.508310;135.395630;136.358120;127.648590;117.395040;118.248500;121.326220;103.887730;87.054860;87.507070
58	WAT-196	WATDE0347	ear 1	ear 1	13	12	25	1.307903;17.002731;20.272491;23.542244;26.158051;28.119904;30.735710;32.697563;34.005470;39.891029;43.814735;45.776588;52.316101	6.971110;104.494320;107.885770;117.235660;116.772450;113.388880;113.230460;109.660850;107.159750;121.732030;104.306900;96.617430;68.008610	3.269752;18.310638;20.926437;24.850151;26.812004;29.427811;32.043610;33.351517;36.621269;43.160782;45.122643;51.662155	4.431380;102.962910;107.328070;114.204040;110.776880;111.910040;107.391950;106.842920;98.625270;100.357330;95.395470;67.621170
59	WAT-196	WATDE0347	ear 2	ear 2	16	15	31	1.456158;5.824631;20.386200;21.842361;23.298515;26.210831;29.123146;31.307381;32.763542;34.947777;36.403931;39.316246;42.956642;45.140877;49.509346;53.877815	5.306520;8.196740;126.780840;122.086660;127.317820;123.610990;132.791190;133.135080;132.021490;131.101650;129.248500;137.057600;133.341480;130.744020;126.099330;115.001710	2.912315;6.552708;21.114281;22.570435;24.754677;26.938911;29.851227;32.035461;34.219696;35.675850;37.132011;42.228561;44.412796;48.053192;51.693581	4.848860;7.280750;121.164250;121.881940;121.420340;123.049450;131.602000;129.592970;129.949020;128.143120;125.746210;129.610260;130.194000;117.804500;104.053190
60	WAT-196	WATDE0347	ear 3	ear 3	12	11	23	2.889549;5.056713;24.561169;26.728336;31.785046;36.119373;38.286533;40.453693;46.232792;49.122341;52.011890;58.513378	6.589700;9.015050;128.029130;135.514990;142.892680;151.282440;152.193520;150.242880;141.535110;135.606750;134.865090;92.232070	3.611938;6.501484;25.283558;28.895496;32.507435;37.564144;39.008923;44.788021;47.677570;51.289509;57.790997	6.492270;7.862110;127.526500;131.854990;138.213120;148.933880;144.982140;134.713300;129.070600;127.363650;90.533530
61	WAT-196	WATDE0347	ear 4	ear 4	12	11	23	2.033878;7.457546;10.847340;22.372631;24.406513;29.152218;31.186092;34.575886;36.609760;38.643642;43.389347;50.168934	4.084560;8.229210;13.813540;126.378380;119.031750;143.429070;138.991860;137.031830;140.163320;139.065550;134.009710;104.919460	3.389793;8.135502;11.525295;23.728550;25.084469;30.508137;33.219975;35.253849;37.965679;41.355473;49.490978	2.483320;7.496280;13.451620;116.047270;116.774350;134.485660;135.944850;135.753100;136.844330;126.137250;104.322800
62	WAT-196	WATDE0347	ear 5	ear 5	14	13	27	2.114365;3.523941;15.505333;19.734062;21.848427;23.962784;28.191513;31.715454;34.534607;37.353760;43.696846;45.811211;52.154305;59.906967	7.427820;6.515430;99.216290;117.413210;117.149020;112.869630;131.292820;124.313150;125.334280;122.618450;115.466660;118.154200;93.644240;51.235770	2.819153;4.933517;16.210121;20.438850;22.553215;24.667572;30.305878;32.420242;36.648972;41.582481;44.401634;50.744728;59.202179	6.458190;4.863080;97.080190;113.531750;109.194980;112.302980;123.576890;123.272250;121.273690;107.268740;115.190350;91.211590;51.017470
63	WAT-196	WATDE0347	ear 6	ear 6	12	11	23	1.522469;4.567413;7.612358;17.762177;22.837082;27.404495;28.926971;32.479401;33.494385;37.046822;40.091766;42.629219	2.848030;3.242040;9.188700;95.354690;120.446950;114.227640;110.964050;107.336980;106.351920;98.733720;98.125760;87.496130	2.537453;5.074905;8.627342;18.777153;25.374535;28.419479;30.956932;32.986893;36.539330;38.061806;41.614235	1.855980;2.775420;7.557220;90.223160;107.129160;110.884360;102.087250;105.075120;95.830250;91.842100;85.107840
64	WAT-196	WATDE0347	ear 7	ear 7	11	10	21	1.343430;26.868580;28.883724;30.227154;32.914013;34.929150;37.616009;39.631153;41.646297;43.661442;50.378590	4.961300;115.103870;113.854040;114.891490;114.128890;117.226090;119.010970;116.604650;128.843980;118.250070;113.428930	3.358570;28.212009;29.555439;32.242298;33.585720;35.600864;38.287724;40.302868;42.989727;47.691730	2.122240;112.101560;112.479240;112.433470;112.374800;115.857500;111.397650;112.663120;117.276100;99.627170
65	WAT-196	WATDE0347	ear 8	ear 8	11	11	22	2.627525;5.255043;19.969177;22.596703;24.173218;27.851753;31.004784;32.581299;37.310837;39.412857;40.989372	2.589630;2.641940;100.215210;108.685950;110.405580;110.936580;105.303880;104.904480;103.795490;106.353940;104.965740	1.051010;3.678535;6.306053;20.494682;23.122208;25.224228;30.479279;32.055794;35.208817;37.836342;40.463867	1.350570;1.925240;1.567090;99.805340;107.630700;108.295500;104.950710;104.674470;98.143890;101.043610;102.643460
66	WAT-196	WATDE0347	ear 9	ear 9	12	11	23	1.612007;19.344040;22.030708;24.717384;26.329384;27.941391;29.553390;32.777397;37.076073;38.688080;41.912086;46.748093	2.315420;109.849980;117.573060;116.713790;113.486030;114.064330;115.691260;102.639090;103.425710;102.391690;99.718010;69.839980	2.686676;20.418709;23.642715;25.792053;26.866722;29.016060;32.240067;35.464073;38.150742;40.300079;45.673424	1.353720;104.542770;113.560710;108.921120;112.848460;112.941480;102.164970;96.045600;101.658380;97.682430;64.004070
67	WAT-202	WATDE0354	ear 1	ear 1	18	17	35	1.875008;4.687519;9.375038;15.937569;24.375099;31.875137;34.687645;39.375168;45.000191;48.750206;53.437729;58.125244;61.875259;66.562782;71.250305;77.812836;79.687836;86.250366	4.877690;4.774200;8.266510;20.337630;39.426790;38.065330;37.124940;37.354730;34.653450;35.131480;33.374480;28.457940;28.443480;24.746660;23.124330;20.392610;21.684580;15.523330	3.750015;5.625023;12.187550;17.812576;29.062622;33.750145;37.500160;43.125183;46.875198;51.562721;56.250237;60.000252;65.625275;70.312798;74.062813;78.750336;85.312866	4.590300;4.597500;7.349990;19.172100;29.601830;34.798190;32.815000;30.997460;31.520770;30.341490;27.069650;25.437930;23.431680;22.251300;16.197540;20.276630;14.426050
68	WAT-202	WATDE0354	ear 2	ear 2	15	15	30	2.120003;4.946674;7.066673;9.893349;16.960022;21.906693;33.213371;36.746712;42.400055;46.640060;50.173393;54.413399;59.360077;64.306747;65.720085	1.888510;2.216360;3.207280;3.731020;6.454760;9.551520;28.485010;26.877450;26.486590;24.851820;23.585510;20.060260;13.131000;10.882610;10.268330	0.706669;2.826672;5.653339;7.773346;10.600014;17.666687;22.613358;35.333374;39.573380;44.520058;48.053390;53.706734;58.653404;62.893410;65.013412	1.705490;1.845270;2.215110;3.078800;3.591830;5.870440;8.733720;24.970190;22.819290;23.826670;21.677840;19.729770;12.678400;10.479120;10.237960
69	WAT-202	WATDE0354	ear 3	ear 3	18	17	35	2.084839;5.212093;7.296928;20.848370;28.145298;31.272549;36.484646;39.611897;44.823994;48.993664;53.163342;59.417850;62.545101;67.757198;71.926868;76.096546;85.478306;101.114582	3.554120;5.302590;4.593390;45.436020;48.232480;45.693810;45.294220;41.510860;46.417320;42.262940;35.779890;34.111090;31.031360;31.480830;26.779480;28.075620;23.046900;7.958990	3.127254;6.254509;9.381767;25.018040;30.230137;34.399807;38.569477;42.739155;47.951244;52.120922;56.290592;61.502682;64.629940;70.884449;74.011707;83.393467;100.072163	3.298990;4.203260;4.422220;29.407740;45.441740;36.256180;40.851810;36.396130;41.344200;33.974910;30.660130;30.701790;27.567860;26.265040;24.100330;19.436150;7.647060
70	WAT-202	WATDE0354	ear 4	ear 4	19	18	37	1.940197;5.820587;7.760784;18.431866;23.282352;31.043133;40.744114;43.654407;49.474995;54.325489;58.205875;63.056370;66.936756;68.876957;72.757351;77.607838;82.458324;90.219112;95.069607	3.299840;4.579030;4.875790;25.141770;41.727920;42.741310;37.148410;35.443370;31.486790;29.922120;29.583150;27.720280;25.248730;25.559550;27.266280;22.667830;25.508520;16.732190;8.989630	2.910294;6.790688;10.671078;19.401958;28.132839;37.833820;42.684315;47.534801;52.385288;56.265682;61.116169;65.966663;67.906857;69.847057;76.637737;78.577938;88.278912;94.099499	3.076000;4.267980;4.579460;21.916260;26.934640;25.423050;35.235920;28.585420;28.185530;26.293900;25.798590;23.814610;24.625860;23.183580;22.207390;20.355020;13.384140;8.044870
71	WAT-202	WATDE0354	ear 5	ear 5	19	18	37	2.065086;7.227798;14.455601;21.683399;28.911198;37.171543;46.464428;49.562061;53.692234;55.757320;58.854946;68.147831;72.278004;76.408176;78.473263;82.603436;85.701061;94.993954;97.059032	3.760160;6.658820;20.135350;45.989780;48.839280;45.468020;43.976970;39.775220;34.459640;34.820650;36.964880;31.442470;26.880850;25.540600;25.305230;21.162380;20.839820;10.739920;11.091890	3.097630;10.325428;15.488144;25.813572;34.073917;43.366802;48.529514;52.659687;54.724773;56.789860;66.082745;71.245464;75.375629;77.440716;81.570889;84.668514;93.961407;96.026485	3.319720;5.661890;18.806560;29.774630;31.653680;33.570880;39.403830;31.794010;34.455510;33.282850;26.308980;26.407270;22.922920;25.239870;20.623060;18.866660;10.053350;10.490210
72	WAT-202	WATDE0354	ear 6	ear 6	15	14	29	1.713562;8.567802;15.422035;23.133057;25.703392;29.987289;31.700851;34.271187;39.411865;44.552544;53.120346;57.404243;62.544922;67.685600;71.112717	5.186460;8.274800;39.800690;41.677720;38.229450;41.785360;42.191490;38.622030;38.153320;33.915430;30.329400;27.383730;28.087780;24.361630;23.368250	5.140678;9.424576;18.849152;24.846611;28.273735;30.844070;33.414413;37.698311;41.982208;50.550003;56.547462;59.974579;65.115257;69.399155	4.626370;7.433330;24.219830;37.668220;32.910460;41.683330;38.052230;33.270400;32.603730;26.601410;26.782580;24.829340;23.532130;21.982460
73	WAT-202	WATDE0354	ear 7	ear 7	17	16	33	0.964348;8.679127;16.393909;24.108685;27.966076;31.823467;35.680851;40.502590;45.324329;49.181713;54.003452;58.825192;64.611271;75.219097;81.969524;83.898220;88.719952	2.597060;4.961500;8.074640;33.841860;37.819180;37.450750;35.789580;34.074580;31.196050;31.792770;28.151060;25.807600;24.943200;20.363680;11.774630;11.899920;9.681960	1.928696;9.643475;17.358257;26.037380;29.894772;34.716503;38.573895;43.395634;47.253025;52.074757;56.896496;61.718235;71.361706;81.005184;82.933880;87.755611	2.526250;4.433760;7.613070;29.397540;34.606600;31.011210;30.721100;26.269190;27.436700;26.317860;23.924070;21.508690;14.619130;11.557400;11.274320;9.217050
74	WAT-325	WATDE0045	ear 1	ear 1	21	21	42	3.377796;6.755589;18.014908;21.392700;30.400154;36.029816;39.407608;46.163200;49.540993;55.170647;59.674377;65.304031;69.807762;72.059624;75.437416;79.941147;83.318939;91.200462;99.081978;104.711647;109.215370	4.233970;4.913560;34.072380;44.439790;42.551960;44.888880;43.317540;43.940520;48.933790;45.498560;47.197960;40.477920;41.351850;40.657950;40.970400;37.058900;32.771980;27.990220;24.544200;17.311140;15.761060	1.125931;4.503727;7.881523;19.140839;25.896431;32.652016;38.281677;42.785400;47.289131;52.918785;57.422516;64.178101;68.681831;70.933693;74.311485;78.815216;82.193008;90.074532;96.830116;102.459785;106.963509	2.535350;4.190270;4.606590;33.296990;32.213700;37.338260;42.418660;37.274640;43.565840;40.801420;41.342860;38.331270;37.551850;40.174140;40.519380;35.850320;32.233200;25.566200;23.904040;16.692050;13.518980
75	WAT-325	WATDE0045	ear 2	ear 2	17	17	34	3.145500;7.339504;9.436504;17.824509;27.261013;34.600513;36.697521;42.988522;46.134022;52.425030;56.619030;61.861530;72.346539;77.589039;81.783039;91.219547;97.510548	3.191850;4.188200;4.570050;28.385760;26.886940;32.823000;33.363060;30.900220;31.266450;27.954460;27.689420;30.550370;22.316970;24.517320;23.808220;25.249360;17.531940	1.048500;4.194000;8.388004;10.485004;22.018509;29.358013;35.649021;39.843021;45.085522;50.328022;54.522030;57.667530;70.249538;75.492039;79.686039;84.928539;95.413548	2.273770;2.021340;3.970080;3.592570;21.628990;24.172810;32.447160;27.142230;30.388780;26.004630;26.398650;27.072680;19.662770;20.723240;21.982960;17.871890;16.111080
76	WAT-325	WATDE0045	ear 3	ear 3	18	17	35	2.032642;5.081604;7.114246;15.244812;24.391701;26.424339;30.489624;39.636513;53.864998;60.979248;63.011887;66.060852;73.175095;80.289345;84.354622;89.436226;94.517830;98.583122	3.010380;3.091930;3.327740;6.139000;29.875290;28.919640;44.916340;34.490440;35.199050;30.015470;30.335460;29.584160;29.687970;20.428580;26.119070;21.411360;13.595900;13.814270	3.048962;6.097923;9.146889;16.261131;25.408020;27.440659;37.603867;46.750755;59.962929;61.995567;65.044533;69.109810;78.256699;81.305664;87.403587;92.485191;96.550468	2.111540;2.518390;3.211930;5.799800;28.332510;27.392320;32.319270;21.101660;29.096000;29.693260;29.353750;25.887720;18.681430;20.406240;19.595570;12.988660;10.720390
77	WAT-325	WATDE0045	ear 4	ear 4	18	17	35	2.229351;17.834801;26.752205;36.784279;41.242981;43.472328;50.160378;56.848427;60.192451;65.765831;70.224533;79.141930;83.600632;86.944656;93.632706;96.976730;101.435425;108.123489	2.935890;41.830460;32.724620;48.238780;40.972320;40.486920;35.145270;38.067850;39.171740;38.734950;36.653890;32.399730;34.200240;33.830590;27.716200;28.117140;17.345340;7.294980	3.344025;22.293503;30.096230;39.013626;42.357651;46.816353;52.389732;57.963104;63.536476;69.109856;76.912582;80.256607;85.829979;91.403351;95.862061;100.320755;107.008804	2.853500;28.536520;26.960770;39.566890;39.718440;31.524420;32.506690;37.097960;36.706980;35.196230;31.268170;31.704740;32.046530;25.968830;25.990760;16.603470;7.035880
78	WAT-325	WATDE0045	ear 5	ear 5	16	15	31	3.239555;10.798515;17.277626;25.916443;35.635109;39.954514;45.353767;52.912735;55.072433;60.471695;71.270210;73.429916;79.909027;89.627686;99.346359;105.825470	10.817620;54.240780;65.526260;65.363410;60.150660;45.160690;51.563320;43.813920;44.234550;47.119380;43.686110;42.511150;45.319580;43.060260;27.006020;9.839440	5.399258;14.038071;20.517181;30.235847;38.874657;41.034363;48.593323;53.992584;58.311989;65.870949;72.350060;75.589615;84.228424;95.026947;104.745605	6.460440;25.399750;24.462530;34.355750;43.920820;44.760020;39.152660;42.301350;40.484450;35.340130;42.459810;40.099670;33.204910;21.493900;9.376460
79	WAT-325	WATDE0045	ear 6	ear 6	23	22	45	1.873852;4.684631;7.495407;9.369263;12.180038;25.297005;27.170860;29.044708;33.729340;38.413971;43.098602;45.909386;47.783234;52.467865;57.152496;59.026352;60.900200;63.710983;68.395615;73.080246;77.764870;86.197205;89.944916	2.937800;2.734870;3.092090;3.670190;4.546650;37.022360;36.612090;38.086550;43.827800;35.303630;33.717060;31.257210;31.340770;32.550680;30.282190;29.163310;28.547110;26.698000;24.840870;18.507490;24.333140;15.023700;10.241450	2.810780;5.621555;8.432335;10.306187;14.053890;26.233933;28.107788;29.981636;37.477043;41.224754;44.972458;46.846306;48.720161;55.278648;58.089424;59.963272;62.774055;67.458687;72.143318;74.017166;83.386429;88.071060	2.163830;1.834780;2.733740;3.583360;4.450920;36.352320;35.475480;35.644690;35.058850;32.374230;30.928590;30.645610;29.402370;28.759550;28.560870;28.424160;25.705870;24.013170;18.030280;17.340250;10.107120;9.746440
80	WAT-325	WATDE0045	ear 7	ear 7	15	14	29	2.180321;4.360645;11.991768;19.622894;28.344181;38.155628;47.967075;53.417873;64.319485;71.950603;77.401409;83.942371;92.663654;95.934147;105.745594	5.294580;3.730130;31.340850;50.967110;53.203570;44.215420;35.626930;39.765360;37.707750;30.520780;23.936190;29.597300;25.240380;23.976750;11.452620	3.270481;5.450806;16.352413;22.893375;32.704823;42.516270;51.237553;59.958836;70.860447;76.311253;78.491573;89.393177;94.843983;103.565266	3.468360;3.225290;24.510710;26.624410;25.895660;30.664130;33.759040;31.929260;29.762870;23.867620;22.276360;20.137350;23.430890;8.737440
81	WAT-325	WATDE0045	ear 8	ear 8	14	14	28	2.624809;11.374180;19.248615;26.248112;30.622791;34.997478;38.497227;42.871914;51.621281;55.995968;63.870403;70.869900;75.244579;85.743824	3.481710;5.100170;28.461110;27.934010;24.097630;33.699910;33.951790;31.664560;34.830920;34.216830;28.352650;18.171070;18.759100;4.525560	0.874935;6.124557;12.249119;22.748363;28.872921;31.497730;36.747356;39.372166;45.496723;53.371159;62.120525;69.994961;73.494709;84.868885	1.501500;2.059940;4.406950;20.771060;23.389310;23.093400;32.781330;28.215940;24.776710;30.223260;26.184510;17.895650;16.632400;4.180680
82	WAT-548	WATDE0748	ear 1	ear 1	15	15	30	4.612484;13.068699;15.374943;20.756176;23.062412;29.212391;34.593624;39.206104;44.587337;49.968571;55.349796;59.962284;65.343510;67.649754;72.262234	5.466260;37.527650;43.535690;68.439420;66.292400;58.523450;58.788640;57.329620;55.765160;50.848380;45.088630;39.973840;24.634880;21.775290;14.972110	0.768745;5.381229;13.837452;16.912441;22.293667;27.674900;32.287380;37.668613;42.281094;48.431072;53.812305;59.193531;64.574764;66.881008;70.724743	2.775650;5.040160;36.408460;33.015300;65.696680;44.942610;47.963000;45.851750;42.985850;40.844080;38.220540;34.954330;24.131500;21.265910;14.066360
83	WAT-548	WATDE0748	ear 2	ear 2	15	14	29	2.556938;6.818497;17.898548;23.012424;27.273983;32.387852;38.354038;44.320217;48.581776;54.547962;59.661831;65.628017;71.594196;78.412693;80.117313	3.236910;5.862830;41.400850;49.732860;59.142900;62.279870;63.759760;53.311950;59.383850;51.950020;39.763950;39.904040;37.066760;18.714810;19.625890	3.409248;7.670807;19.603176;24.717045;30.683231;35.797100;41.763287;46.877155;52.843342;58.809521;63.923389;69.889576;77.560383;79.265003	3.204940;5.784430;35.698240;46.338410;49.469410;49.721360;49.490770;47.026630;43.810270;35.397590;32.546370;33.182850;18.603860;18.572010
84	WAT-548	WATDE0748	ear 3	ear 3	16	16	32	5.932980;16.103802;20.341640;23.731915;28.817326;33.055172;38.140583;43.225986;48.311398;53.396809;59.329792;63.567631;68.653042;70.348179;73.738453;75.433590	5.069020;53.115590;66.091170;73.389980;71.503750;70.795220;69.978660;63.774560;58.823910;47.343260;49.782070;45.931290;43.294720;41.992880;37.844040;36.837800	1.695137;6.780548;17.798939;22.036777;26.274624;31.360035;36.445446;41.530857;46.616261;52.549244;56.787083;61.872494;66.957905;69.500614;72.043316;74.586025	1.850990;4.034750;45.183220;58.891370;58.895670;59.027110;59.882750;56.259700;50.054420;42.688380;36.877460;39.627370;35.817100;41.344240;36.139860;36.381090
85	WAT-548	WATDE0748	ear 4	ear 4	13	13	26	9.191925;20.055103;25.068882;28.411396;34.260807;40.110210;43.452724;50.137760;54.315907;59.329685;65.179089;67.685978;72.699749	6.345310;45.731670;67.649990;61.926170;59.728470;58.869750;60.008830;55.560360;49.425910;46.073640;43.211110;41.122820;36.016770	0.835632;10.863182;20.890736;27.575771;32.589542;36.767689;40.945835;48.466503;52.644650;57.658428;63.507832;66.850346;71.864124	1.459580;5.609040;45.125130;56.772790;49.314900;49.454920;51.609380;45.473310;44.086210;42.761490;36.621320;40.459320;34.550340
86	WAT-548	WATDE0748	ear 5	ear 5	14	14	28	3.448727;17.243641;21.554546;26.727642;31.038548;37.073818;42.246914;47.420002;52.593098;54.317455;57.766186;62.939274;68.112370;73.285458	3.143390;46.352920;47.267830;58.493220;56.211650;55.756470;54.709160;58.037530;50.899710;47.430490;53.488690;47.916380;42.820650;39.030150	0.862183;4.310909;19.830181;24.141094;29.314182;35.349461;39.660366;44.833462;50.868732;53.455280;56.041821;61.214916;66.388004;71.561100	1.533720;2.919110;37.745730;40.620370;47.964320;44.075480;46.281240;45.924390;44.396630;47.352700;45.804810;39.994270;37.378200;32.447980
87	WAT-720	WATDE0930	ear 1	ear 1	21	20	41	1.902676;7.610699;14.270058;20.929420;27.588783;30.442795;35.199478;38.053490;42.810173;46.615524;49.469536;54.226227;57.080238;58.982910;61.836922;66.593605;69.447617;75.155640;78.009659;83.717682;86.571686	4.138300;10.084630;57.048540;61.064110;43.244680;38.174540;44.852630;42.893990;41.047400;42.201050;37.725740;36.477090;28.526060;28.514720;29.871960;28.583590;28.059480;24.609920;23.584710;15.056250;13.991730	3.805351;8.562035;18.075409;23.783432;29.491455;32.345467;37.102150;40.907501;43.761513;48.518204;52.323547;56.128899;58.031570;59.934250;64.690933;68.496284;72.301628;77.058319;82.766342;85.620346	2.459180;9.270520;40.414830;37.421070;36.913950;37.145560;40.981150;36.655980;38.466510;35.700770;32.994620;27.683540;28.478080;26.673480;24.567030;25.685010;19.602970;23.170620;14.381130;13.642400
88	WAT-720	WATDE0930	ear 2	ear 2	16	16	32	2.589203;7.767612;20.713634;27.618176;34.522717;36.248859;42.290333;48.331806;50.921017;55.236355;56.962490;60.414761;63.003963;67.319309;72.497707;75.086910	2.996690;5.449300;66.055050;52.466630;51.769140;51.036230;38.817670;32.116930;27.984410;30.250340;31.335630;31.674630;29.077710;25.905070;18.372400;18.824380	1.726135;4.315338;10.356815;25.028973;31.070446;35.385792;39.701130;47.468739;50.057941;51.784084;56.099422;57.825558;62.140896;65.593166;70.771580;73.360775	1.881280;1.390990;4.356760;37.564080;42.264860;49.878730;36.423330;31.295920;27.792930;27.862360;30.101770;29.307360;28.271840;23.116640;17.106070;18.080090
89	WAT-720	WATDE0930	ear 3	ear 3	17	16	33	2.690483;10.761932;21.523865;26.008003;28.698486;32.285797;35.873108;38.563591;43.047729;45.738213;50.222351;53.809662;58.293800;61.881111;65.468422;69.055733;77.127182	1.936460;4.103900;46.728760;35.986470;38.549560;39.079450;40.912460;39.289060;39.892110;37.038350;30.375430;30.039450;26.833110;27.782420;24.126820;24.287480;16.216020	3.587311;11.658760;24.214348;26.904831;30.492142;34.079453;37.666763;41.254074;44.841385;49.325523;52.016006;56.500145;60.087456;64.571594;67.262077;75.333527	1.445540;3.976350;35.704430;33.799760;36.717960;35.186230;37.524020;34.218400;36.039780;29.355620;27.027310;24.426990;25.142240;23.337830;21.902710;14.893490
90	WAT-720	WATDE0930	ear 4	ear 4	18	18	36	3.432072;18.018372;22.308464;25.740532;29.172607;31.746658;36.036743;39.468819;43.758904;47.190979;51.481064;54.913139;59.203224;62.635300;66.925385;71.215477;73.789528;78.079620	1.985830;35.559380;54.458220;43.089580;46.274450;47.424650;48.942100;40.881320;41.744810;39.615860;30.482980;29.726190;31.364950;30.167010;22.719600;26.160300;24.115090;20.512200	0.858021;4.290089;18.876389;24.882515;27.456566;30.030624;33.462692;38.610802;41.184853;46.332962;50.623047;53.197105;56.629173;61.777283;66.067368;68.641418;72.931511;77.221603	0.987960;1.869200;34.614080;40.753070;37.930540;46.079680;44.382560;39.509160;36.841960;37.860200;29.997540;25.893260;28.785240;28.515620;21.118840;20.274300;23.760480;19.732460
91	WAT-720	WATDE0930	ear 5	ear 5	13	12	25	3.318970;6.637936;10.786644;13.275871;23.232780;26.551743;29.870712;37.338394;46.465553;58.081940;61.400909;64.719879;77.166000	1.593960;1.703740;3.128330;4.096990;39.024860;34.263950;42.299690;34.478650;31.683070;25.401100;29.316450;24.409170;10.052290	4.978455;7.467678;11.616386;14.105614;25.722000;27.381485;34.849167;41.487099;52.273743;58.911682;63.060394;73.847038	0.994870;1.511310;2.816640;4.088210;33.398770;33.518290;26.731010;22.741180;20.615200;24.460650;23.474590;7.173450
92	WAT-720	WATDE0930	ear 6	ear 6	15	15	30	3.458935;7.782608;20.753620;25.077290;35.454098;39.777767;46.695637;49.289837;54.478245;57.937183;60.531384;65.719784;72.637661;76.961323;79.555531	2.231720;3.080960;49.014470;54.798620;48.332760;51.821770;35.933700;35.708410;33.339580;32.290690;27.370960;27.006110;20.673070;14.498450;14.608990	1.729469;4.323669;8.647339;22.483082;31.130428;37.183567;44.966167;48.425106;51.884045;56.207714;59.666645;63.125584;70.908192;76.096592;78.690800	1.156370;1.962210;2.658060;46.567630;38.055250;40.795520;33.593840;35.202000;30.441800;29.659980;26.800430;21.992480;18.321140;14.277920;13.790480
93	WAT-720	WATDE0930	ear 7	ear 7	19	19	38	4.986057;18.947018;23.933071;27.921917;30.913555;34.902401;37.894032;39.888454;41.882877;51.854992;54.846622;58.835468;63.821529;67.810375;72.796429;75.788067;80.774128;84.762959;89.749027	3.805900;52.478120;44.885380;48.482110;51.320160;55.661590;53.629400;54.637750;50.833160;40.525640;42.895690;39.756320;36.640690;32.857660;36.023700;31.856700;28.910690;21.262370;20.677280	1.994423;6.980480;21.938648;24.930286;28.919132;31.910763;36.896824;38.891247;40.885670;48.863361;52.852200;57.838261;60.829891;65.815952;69.804798;74.790852;77.782490;83.765751;87.754597	1.918200;3.545670;42.690030;39.741310;47.781650;44.016180;52.685000;53.241530;49.738250;36.182860;38.403170;38.055960;34.299090;29.712900;30.325740;31.325990;25.980010;21.260810;16.885780

## Sheet: S10 Fit thickness traits
order	Variety ID	GRU code	spike ID	original_ears_ID	SG-max	SG-mean	SG-mode	SG-Amplitude	SG-loc	SG-scale	SG-Skewness α	Skewed MSE	Skewed R2		LogN-max	LogN-mean	LogN-mode	LogN-amplitude	LogN-shape	LogN-loc	LogN-scale	LogN-mse	LogN-r2		gamma-max	gamma-mean	gamma-mode	gamma-amplitude	gamma-loc	gamma-scale	gamma-mse	gamma-r2		Chi2-amplitude	Chi2-df	Chi2-loc	Chi2-scale	Chi2-mse	Chi2-r2		G-max	G-mean	G-mode	G-Amplitude	G-Mean	G-Std Dev	G-MSE	G-R2
1	paragon	paragon	ear 1	ear 1	78.0785	43.359	30.3451	4342.05	20.1892	42.7838	10.1049	26.056	0.96102		78.4312	43.3333	33.9151	5037.8	0.779395	10.0561	44.5361	34.4962	0.948394		77.4052	42.7101	33.9151	4482.45	14.7706	22.0355	33.1375	0.950426		4463.17	4.01797	14.2168	10.623	33.4163	0.950009		74.9958	44.2056	45.5176	74.9969	45.3949	21.9058	135.738	0.796936
2	paragon	paragon	ear 2	ear 2	88.0228	51.5515	38.9803	6475.21	21.336	54.1743	5.92897	40.5366	0.946701		87.7388	51.4186	42.4197	6974.72	0.591349	-2.40857	63.874	42.1476	0.944583		86.6056	51.1696	42.4197	6623.35	9.7168	24.902	36.3827	0.952163		6623.35	4.65296	9.7168	12.451	36.3827	0.952163		85.3909	51.6097	53.8845	85.3945	54.145	29.0861	130.179	0.828835
3	paragon	paragon	ear 3	ear 3	104.354	60.5554	26.3618	7441.97	18.4667	56.2251	20.4012	60.7814	0.946041		105.698	60.9055	37.3459	8648.95	0.796563	6.99558	56.2688	88.584	0.92136		104.092	60.4214	36.2475	7853.93	15.2174	33.6743	67.628	0.939963		7853.93	3.24084	15.2174	16.8372	67.628	0.939963		101.148	61.4021	51.6253	101.156	51.2742	28.0457	247.513	0.78027
4	paragon	paragon	ear 4	ear 4	90.5741	57.1315	24.0096	6521.89	13.1645	56.1013	13.2884	60.3209	0.917194		91.0746	57.1685	30.012	8223.26	0.919513	3.875	59.774	83.9572	0.884746		89.124	56.9401	31.0124	6883.09	8.19248	32.8456	78.951	0.891619		6883.08	3.40383	8.19239	16.4227	78.951	0.891619		85.795	57.5818	45.018	85.796	45.1586	29.5729	223.4	0.693325
5	paragon	paragon	ear 5	ear 5	92.4529	57.2687	31.455	6252.77	13.6995	55.0128	32.1976	110.735	0.870985		92.307	57.0504	34.3145	6696.59	0.633983	-3.00052	55.8123	116.023	0.864823		91.1985	56.7072	34.3145	6302.64	7.44456	24.5242	104.162	0.878642		6302.65	4.17653	7.44453	12.2621	104.162	0.878642		90.239	57.2545	44.7995	90.2413	44.9725	25.8311	204.514	0.761724
6	paragon	paragon	ear 6	ear 6	80.9431	51.1605	19.8753	4757.35	9.59048	45.4654	11.281	67.8567	0.880539		81.7649	51.0267	23.1878	5929.55	0.916595	2.06422	48.0322	83.7821	0.852503		79.8303	50.7692	23.1878	5067.13	6.31515	28.7749	78.8155	0.861247		5067.13	3.19107	6.31515	14.3875	78.8155	0.861247		75.3846	51.4	35.6099	75.3855	35.4642	25.3098	193.436	0.659459
7	paragon	paragon	ear 7	ear 7	96.0772	65.0723	19.2143	7126.32	6.42874	57.2645	10.7954	136.465	0.799101		96.3031	65.1665	24.0179	8599.83	0.842142	-5.24945	60.3001	157.951	0.76747		94.6303	64.8051	24.9786	7454.24	0.420686	31.8749	150.93	0.777806		7454.29	3.5927	0.420983	15.9379	150.93	0.777806		89.651	65.0108	36.5072	89.6592	36.9639	33.6107	230.327	0.66092
8	paragon	paragon	ear 8	ear 8	100.301	57.6688	33.0126	7188.83	19.4806	54.7651	9.05228	98.6412	0.909746		100.346	57.7969	40.9812	7651.74	0.582026	-2.78506	61.9082	110.375	0.89901		99.1573	57.4321	40.9812	7356.51	11.1177	25.8119	93.4145	0.914528		7356.51	4.27842	11.1177	12.9059	93.4145	0.914528		97.3864	58.1096	53.5032	97.4008	53.0074	28.4212	201.317	0.815801
9	WAT-93	WATDE0227	ear 1	ear 1	42.0652	27.3277	31.8042	2832.94	15.7598	49.7065	6.04591	10.7628	0.929086		41.9253	27.3011	36.2214	3019.64	0.558325	-8.08977	60.1401	10.4939	0.930857		41.636	27.175	36.2214	2840.72	2.89652	20.021	9.84775	0.935115		2840.72	5.34975	2.89688	10.0106	9.84775	0.935115		41.8264	27.4478	44.1724	41.8298	44.4924	25.0974	24.625	0.83775
10	WAT-93	WATDE0227	ear 2	ear 2	45.8489	27.9945	35.7866	2740.9	19.0473	42.0681	4.25069	10.6634	0.945046		45.4835	27.9086	37.5323	2856.07	0.463956	-10.9952	60.1296	11.0124	0.943248		45.1616	27.8124	37.5323	2751.7	1.75546	15.2587	10.8547	0.944061		2751.7	6.73122	1.75547	7.62934	10.8547	0.944061		45.0376	28.1607	44.515	45.038	44.4107	23.1581	26.9746	0.860987
11	WAT-93	WATDE0227	ear 3	ear 3	41.816	25.3905	49.3982	2444.12	32.9234	30.9323	1.35251	6.68387	0.960021		41.6895	25.361	49.3982	2443.15	0.106897	-168.056	219.964	6.47075	0.961296		41.6541	25.352	49.3982	2441.56	-90.256	3.89899	6.42692	0.961558		2441.56	73.6108	-90.2617	1.94941	6.42692	0.961558		41.927	25.4436	51.1624	41.9287	50.9555	22.8626	7.10681	0.957491
12	WAT-93	WATDE0227	ear 4	ear 4	39.1943	26.423	35.1899	2848.08	15.6907	52.6709	5.19987	8.50134	0.929092		38.9644	26.3846	36.9946	3045.15	0.547817	-11.603	66.1207	7.92863	0.933869		38.7283	26.3077	37.8969	2860.57	0.145267	20.949	7.26939	0.939368		2860.57	5.6112	0.145647	10.4746	7.26939	0.939368		39.0625	26.4954	46.0176	39.0625	45.9615	26.9716	18.2857	0.847484
13	WAT-93	WATDE0227	ear 5	ear 5	60.7927	39.2644	27.236	4250.58	10.7376	51.7547	6.20663	30.5416	0.894217		60.7023	39.267	31.1269	4564.77	0.586819	-11.7422	60.7276	29.8831	0.896498		60.0378	39.1208	31.1269	4333.99	0.353479	23.6699	26.4278	0.908465		4333.99	4.6115	0.353478	11.8349	26.4278	0.908465		58.6913	39.0166	40.854	58.6918	40.9704	28.6523	56.8875	0.802966
14	WAT-93	WATDE0227	ear 6	ear 6	47.9803	32.4387	35.3183	3834.47	15.9432	59.2555	6.3006	25.6548	0.866338		47.7233	32.3743	38.2615	4241.58	0.635739	-6.9611	68.2592	26.0691	0.86418		47.3478	32.2119	39.2425	3894.49	3.74098	26.7601	25.2402	0.868498		3894.49	4.65841	3.74098	13.3801	25.2402	0.868498		47.4326	32.5913	49.0532	47.4366	49.4437	29.9193	46.7367	0.756501
15	WAT-93	WATDE0227	ear 7	ear 7	43.4731	28.1709	28.4437	2924.6	14.0454	50.8374	7.74438	10.8508	0.930807		43.3505	28.1076	31.9992	3316.1	0.704684	-1.52119	55.5076	12.7905	0.918437		42.8678	27.9579	32.888	2993.91	5.90864	24.6214	12.3257	0.921401		2993.92	4.21004	5.90876	12.3109	12.3257	0.921401		42.2706	28.3733	42.6655	42.2759	43.0813	26.1279	35.0541	0.776467
16	WAT-93	WATDE0227	ear 8	ear 8	49.9691	32.6178	25.611	3870.27	12.6286	59.9779	11.4845	22.3883	0.894653		50.3322	32.5187	30.7332	4955.92	0.93632	3.20961	65.0226	26.0703	0.877327		49.3746	32.3471	30.7332	4155.98	8.82482	38.8493	22.6506	0.893419		4155.98	3.1362	8.82482	19.4246	22.6506	0.893419		47.943	32.7024	46.0998	47.9454	46.4141	31.0501	65.8069	0.690349
17	WAT-93	WATDE0227	ear 9	ear 9	76.1828	46.2307	23.3197	4959.52	12.4548	50.3277	11.1077	46.1336	0.909971		76.4628	46.3785	30.1213	5542.97	0.70633	-1.772	52.5448	56.2951	0.890142		75.344	46.0647	31.0929	5115.01	7.10811	26.3825	53.6738	0.895257		5115.01	3.74623	7.10812	13.1913	53.6738	0.895257		72.3444	46.4595	41.7811	72.3454	41.6401	27.0883	126.493	0.753153
18	WAT-94	WATDE0228	ear 1	ear 1	38.729	26.2889	33.8783	2729.51	15.5684	51.4643	5.50865	13.5251	0.892332		38.5133	26.2415	36.4192	2929.42	0.562608	-9.56711	63.1839	13.4113	0.893238		38.3344	26.1566	37.2661	2723.32	0.865532	20.1671	12.9239	0.897118		2723.32	5.6041	0.865503	10.0835	12.9239	0.897118		38.7901	26.4455	44.8887	38.7912	44.7052	25.5936	23.0888	0.816199
19	WAT-94	WATDE0228	ear 2	ear 2	41.0308	27.3342	35.6464	2855.66	16.911	50.1557	4.97568	10.9529	0.922537		40.813	27.29	38.2547	3002.46	0.507149	-12.6769	65.8117	10.4197	0.926308		40.6277	27.2163	39.1241	2839.68	-0.473746	18.3231	9.83231	0.930463		2839.68	6.28694	-0.473741	9.16156	9.83231	0.930463		41.1205	27.4782	46.0795	41.1224	45.8371	25.4583	20.0827	0.857969
20	WAT-94	WATDE0228	ear 3	ear 3	49.0646	35.5509	42.7516	4808.89	15.3305	69.0364	4.27511	20.093	0.8641		48.7986	35.5437	46.0401	5038.77	0.484131	-30.1699	95.6565	18.4862	0.874968		48.4393	35.4992	44.9439	4881.55	-5.2342	29.3238	16.6879	0.887131		4881.55	5.41313	-5.23415	14.6619	16.6879	0.887131		49.0642	35.5654	54.8097	49.0645	54.7024	36.6296	23.8333	0.838802
21	WAT-94	WATDE0228	ear 4	ear 4	39.3931	24.9838	32.9812	2305.97	16.6985	41.4286	4.40305	6.233	0.953778		39.1188	24.9146	34.5901	2412.66	0.478838	-11.1167	57.6254	5.95581	0.955834		38.8779	24.83	35.3945	2311.71	0.729804	15.2233	5.6363	0.958203		2311.71	6.51138	0.730134	7.61175	5.6363	0.958203		39.0334	25.0937	41.0254	39.0374	41.3419	22.1966	16.6441	0.876574
22	WAT-94	WATDE0228	ear 5	ear 5	53.2414	36.3727	36.051	4143.42	14.3932	55.3658	4.55289	22.3217	0.889028		52.9041	36.3886	38.974	4277.76	0.446709	-26.2211	79.7879	21.6163	0.892535		52.5839	36.342	38.974	4151.67	-5.86056	20.5234	19.9174	0.900981		4151.67	6.36673	-5.86058	10.2617	19.9174	0.900981		52.6914	36.4049	46.7688	52.6919	46.8795	29.9961	30.3673	0.849029
23	WAT-94	WATDE0228	ear 6	ear 6	44.0525	28.4278	37.2628	2973.65	17.1977	46.1795	3.62325	7.52096	0.950283		43.7621	28.389	38.1943	3061.34	0.411914	-23.7989	73.7465	6.6338	0.956148		43.5037	28.3401	38.1943	2983.49	-5.40976	16.0412	5.96097	0.960596		2983.49	7.47502	-5.40978	8.02061	5.96097	0.960596		43.5209	28.4071	44.7153	43.5272	45.1613	26.2562	15.7229	0.896065
24	WAT-94	WATDE0228	ear 7	ear 7	40.1999	26.3053	36.1315	2623.45	16.9766	45.6891	4.12304	7.73659	0.940073		39.8926	26.2606	36.9918	2730.17	0.455785	-16.7914	66.4572	7.61667	0.941002		39.6786	26.2199	37.852	2621.23	-3.31439	15.8863	7.39384	0.942728		2621.23	7.1615	-3.31445	7.94313	7.39384	0.942728		39.8085	26.4016	43.8739	39.8089	43.9826	24.8452	17.3032	0.865971
25	WAT-94	WATDE0228	ear 8	ear 8	49.5521	32.993	23.9243	3345.6	11.715	51.8038	9.67694	18.5147	0.906644		49.6419	32.9393	29.0509	3937.26	0.782626	-0.607523	54.9162	21.055	0.893836		49.0884	32.7848	30.7598	3450.3	5.71055	27.0143	19.8455	0.899934		3450.3	3.80306	5.71056	13.5072	19.8455	0.899934		48.3983	33.1573	41.0131	48.4042	40.6066	25.9596	51.5329	0.740159
26	WAT-94	WATDE0228	ear 9	ear 9	51.4883	37.1925	34.7282	4843.08	12.2198	69.5742	6.15858	25.3348	0.84814		51.3491	37.1889	39.9901	5274.24	0.607224	-16.5134	81.1383	23.9367	0.85652		50.9836	37.135	39.9901	4896.93	-2.08085	30.9497	21.6447	0.870258		4896.93	4.71702	-2.08085	15.4749	21.6447	0.870258		51.264	37.1851	50.5138	51.2641	50.5602	35.2342	34.878	0.790936
27	WAT-117	WATDE0253	ear 1	ear 1	60.0484	39.0194	24.7738	4023.51	10.052	50.4788	7.4614	36.6911	0.874029		60.0344	38.9916	28.444	4531.65	0.70349	-5.32061	54.8186	39.017	0.866043		59.2074	38.8028	28.444	4143.79	2.41553	25.3139	36.0662	0.876174		4143.8	4.08126	2.41554	12.657	36.0662	0.876174		57.2319	38.9182	39.4546	57.2352	39.1511	27.9386	76.6844	0.73672
28	WAT-117	WATDE0253	ear 2	ear 2	59.9917	36.3892	31.5226	4365.92	15.9875	54.9844	7.72657	24.7647	0.925331		59.7865	36.3961	36.9575	4797.37	0.649456	-3.40716	60.8536	29.7468	0.91031		59.0273	36.1728	36.9575	4484.01	7.02266	26.6697	26.4937	0.920118		4484.01	4.23162	7.02266	13.3348	26.4937	0.920118		57.673	36.4327	48.9144	57.6735	48.7888	29.4065	68.4803	0.793524
29	WAT-117	WATDE0253	ear 3	ear 3	54.5908	32.8255	28.6145	3317.45	14.0631	45.3058	6.66502	16.2037	0.939436		54.5704	32.755	31.3837	3608.9	0.630017	-3.1619	51.0676	17.9862	0.932773		53.8273	32.5733	31.3837	3389.99	5.88734	21.5164	17.1122	0.93604		3389.99	4.37536	5.88734	10.7582	17.1122	0.93604		52.1042	32.811	40.6142	52.1121	41.0467	24.8834	55.9798	0.790764
30	WAT-117	WATDE0253	ear 4	ear 4	54.7267	36.0257	20.323	3836.59	9.66119	54.6759	13.7108	23.4912	0.902891		55.4404	36.0034	26.7894	4693.27	0.877635	0.316195	56.5544	27.1119	0.887923		54.4848	35.7045	25.8657	4108.69	7.04343	35.679	23.144	0.904326		4108.69	3.06328	7.04343	17.8395	23.144	0.904326		52.4097	36.0708	39.7223	52.4154	40.1387	28.5855	71.3729	0.704955
31	WAT-117	WATDE0253	ear 5	ear 5	61.3063	37.6479	15.883	3725.45	10.5322	48.1138	26.6594	49.1921	0.861816		62.6026	37.9018	23.8245	4745.34	0.964852	3.89858	49.916	60.9193	0.828874		61.6361	37.445	22.0597	3964.11	7.83894	30.3201	58.7682	0.834916		4088.39	2.70143	9.5663	18.1484	57.0202	0.839826		56.9275	38.1911	37.0603	56.9348	37.4798	26.3163	134.832	0.621247
32	WAT-117	WATDE0253	ear 6	ear 6	55.1195	34.5867	20.7484	3324.94	9.91549	46.3111	9.77505	22.3476	0.912944		55.5718	34.4952	24.2065	3953.3	0.834901	0.461343	48.1629	27.6307	0.892363		54.4043	34.336	25.071	3500.11	5.8855	27.5493	24.7747	0.903489		3523.54	3.24485	6.44467	14.4191	24.9106	0.90296		51.5841	34.621	36.3097	51.5865	36.5595	25.826	74.1311	0.711219
33	WAT-117	WATDE0253	ear 7	ear 7	52.6325	32.82	25.9943	3076.23	12.639	43.6033	6.69914	23.3082	0.90535		52.3998	32.8181	30.1869	3309.9	0.589125	-6.13191	50.8732	25.3954	0.896875		51.8597	32.6402	30.1869	3129.07	3.57781	19.4291	23.8496	0.903151		3129.07	4.7219	3.57781	9.71456	23.8496	0.903151		50.8614	32.9104	38.5722	50.8617	38.5151	23.4196	51.2686	0.791808
34	WAT-149	WATDE0020	ear 1	ear 1	81.9395	50.4629	42.0899	5627.37	23.5673	49.5726	5.03663	56.4869	0.92194		81.4138	50.3746	44.8959	5872.44	0.486199	-7.63395	66.611	56.3176	0.922174		80.9415	50.1479	44.8959	5623.51	6.78955	18.4873	53.0327	0.926714		5623.52	6.15043	6.79012	9.24385	53.0327	0.926714		82.4669	51.1549	52.3786	82.4703	52.6082	24.8312	92.8167	0.871736
35	WAT-149	WATDE0020	ear 2	ear 2	89.8738	58.0717	41.7101	5950.94	22.3688	45.6295	3.76774	88.6402	0.89836		89.3188	57.9251	43.3785	6109.1	0.406608	-18.3504	72.8905	80.6422	0.907531		88.8049	57.6936	43.3785	5962.09	0.640184	15.8108	75.9031	0.912965		5962.09	7.39709	0.640056	7.90538	75.9031	0.912965		91.8196	58.4692	49.2179	91.8231	49.0233	23.254	102.697	0.882241
36	WAT-149	WATDE0020	ear 3	ear 3	75.1423	45.99	40.3773	4955.44	23.7435	48.0041	5.37566	56.2943	0.915758		74.8438	45.9253	43.8884	5162.71	0.495446	-4.84087	62.7885	54.0633	0.919097		74.347	45.6695	43.8884	4958.34	9.5907	18.7145	49.8484	0.925404		4957.85	5.70135	9.57457	9.35052	49.8484	0.925404		76.6642	46.7027	51.7883	76.6747	51.4144	22.9519	78.8998	0.881931
37	WAT-149	WATDE0020	ear 4	ear 4	93.0569	48.3824	33.8624	3750.44	23.259	29.2583	5.25682	69.968	0.940779		92.5149	48.3128	35.8543	3909.13	0.485741	5.08615	39.0484	69.0783	0.941532		91.8934	48.0617	35.8543	3765.9	14.1531	11.2827	63.4584	0.946288		3765.94	5.85353	14.1547	5.64193	63.4584	0.946288		93.7029	49.4998	40.5021	93.7149	40.7342	14.6394	109.758	0.9071
38	WAT-149	WATDE0020	ear 5	ear 5	108.954	68.5888	35.5908	6302.96	19.9494	41.6693	4.95855	140.765	0.9011		108.474	68.3425	37.7699	6621.3	0.506977	-4.57938	54.6197	130.378	0.908398		107.765	67.9941	37.7699	6321.88	7.31331	16.4991	121.784	0.914436		6321.91	5.67823	7.31392	8.24983	121.784	0.914436		112.09	69.4124	43.5806	112.092	43.4848	19.572	181.216	0.87268
39	WAT-149	WATDE0020	ear 6	ear 6	74.3091	38.7397	38.8119	3028.62	26.3094	27.3002	3.2607	27.1354	0.962461		73.8476	38.5952	39.4929	3058.28	0.332451	-7.38114	52.5174	25.2376	0.965087		73.5798	38.4741	39.4929	3006.37	7.00064	7.818	24.12	0.966633		3006.37	10.3537	7.00075	3.90901	24.12	0.966633		74.9688	39.3515	42.8974	74.9688	42.8916	15.025	40.111	0.944511
40	WAT-149	WATDE0020	ear 7	ear 7	78.6936	39.9439	33.5637	2960.16	23.3119	26.9526	4.77681	26.3219	0.96683		78.0707	39.8646	35.5001	3065.42	0.458205	4.41879	37.9611	28.4719	0.964121		77.6764	39.6873	35.5001	2950.91	12.7983	9.49001	27.4408	0.96542		2950.91	6.75737	12.7981	4.74495	27.4408	0.96542		78.2796	40.9879	39.3729	78.2812	39.4604	14.0663	60.2071	0.92413
41	WAT-156	WATDE0296	ear 1	ear 2	122.219	71.177	27.8955	6225.08	13.6798	35.9842	4.35475	94.6686	0.934796		121.258	71.1691	30.3569	6393.48	0.423346	-15.3541	54.3389	97.2622	0.933009		120.305	70.9097	29.5365	6273.2	-0.430696	13.3113	85.4652	0.941135		6273.21	6.53983	-0.430147	6.6558	85.4652	0.941135		118.306	70.9896	36.1001	118.308	36.2212	20.7375	180.066	0.875977
42	WAT-156	WATDE0296	ear 2	ear 3	67.3269	38.6131	28.7085	3897.54	18.2413	44.5907	10.3329	29.9128	0.938764		67.4456	38.6269	33.1942	4467.78	0.749904	6.88568	46.6777	38.2798	0.921635		66.4502	38.441	34.0913	4013	12.4574	22.4162	34.343	0.929695		4038.14	3.76522	13.179	11.774	34.0101	0.930376		65.139	39.2705	44.857	65.141	44.6782	22.6582	99.4898	0.796329
43	WAT-156	WATDE0296	ear 3	ear 4	99.2749	56.9582	30.2572	4976.14	17.2241	36.3859	5.2534	50.0143	0.95101		98.737	56.8095	32.6459	5246.65	0.522235	-2.9722	46.5204	50.5113	0.950523		97.7469	56.5134	32.6459	5049.41	7.30255	15.2956	44.2021	0.956703		5049.41	5.28358	7.30253	7.64777	44.2021	0.956703		97.2041	57.2421	39.8121	97.2173	39.4903	19.5087	139.273	0.86358
44	WAT-156	WATDE0296	ear 4	ear 5	88.8915	54.9862	23.7726	4697.15	12.9849	40.2756	8.70836	56.5346	0.927243		88.9051	54.9109	27.4871	5307.59	0.707631	1.23555	43.2321	63.799	0.917894		87.7927	54.6437	28.23	4833.91	7.34832	20.0537	54.4091	0.929978		4858.65	3.90875	7.79237	10.3855	54.2491	0.930184		87.0729	55.5021	36.4018	87.0779	36.6189	20.2333	155.318	0.800113
45	WAT-156	WATDE0296	ear 5	ear 6	105.292	66.5641	30.9379	5829.59	14.0969	37.8664	3.61984	58.6774	0.935191		104.37	66.5707	31.7312	5942.83	0.372498	-24.8449	65.3561	59.387	0.934408		103.77	66.5002	31.7312	5836.65	-6.98405	12.2596	55.3503	0.938866		5836.65	8.35813	-6.98406	6.12979	55.3503	0.938866		102.977	66.6497	37.2841	102.977	37.3241	22.1213	103.453	0.885737
46	WAT-156	WATDE0296	ear 6	ear 7	87.9067	56.3383	14.7926	6354.32	10.1997	57.4113	37.4126	103.857	0.85754		88.8972	57.0872	30.5714	7008.61	0.67605	-6.02435	58.4601	134.368	0.815688		87.9249	56.6543	30.5714	6547.12	4.74801	28.6843	119.191	0.836507		6547.12	3.79177	4.74801	14.3422	119.191	0.836507		86.1323	56.8886	42.4055	86.1367	42.6938	28.6156	195.398	0.731975
47	WAT-156	WATDE0296	ear 7	ear 8	97.7504	62.1051	31.1694	5970.8	15.4065	44.2397	5.16809	100.651	0.884768		96.8018	62.0827	33.6966	6328.81	0.521429	-9.77272	57.303	107.103	0.877382		95.9704	61.9217	34.539	6027.48	0.994498	17.2619	103.551	0.881448		6027.48	5.86851	0.9945	8.63094	103.551	0.881448		95.3964	62.5146	42.1208	95.4083	41.7431	23.8755	182.16	0.791453
48	WAT-156	WATDE0296	ear 8	ear 9	86.3115	50.6264	21.5818	4726.5	14.1408	42.9393	16.2883	94.4141	0.886051		86.5404	51.0821	29.8824	5180.6	0.654021	0.617909	45.2205	113.157	0.863429		85.5878	50.7932	30.7125	4824.3	8.1586	19.6762	101.569	0.877415		4824.3	4.26101	8.15861	9.83817	101.569	0.877415		84.3871	51.5592	39.8433	84.3881	39.7386	21.3504	180.819	0.781768
49	WAT-176	WATDE0323	ear 1	ear 1	139.479	89.0445	20.7483	5421.15	9.34273	27.1129	4.03442	173.721	0.898226		138.525	88.9716	21.8403	5611.5	0.43945	-11.809	40.4966	164.016	0.903912		137.407	88.7019	21.2943	5496.33	-0.674797	10.7078	145.592	0.914705		5496.33	6.09742	-0.674808	5.3539	145.592	0.914705		137.289	89.0135	26.2084	137.309	25.9482	-15.2523	249.646	0.853746
51	WAT-176	WATDE0323	ear 2	ear 3	126.72	79.171	25.6172	4081.11	30.5271	13.7558	-0.497928	138.321	0.908856		126.689	79.1616	25.6172	4081.42	0.000202709	-63374.5	63400.2	138.419	0.908791		126.662	79.1545	25.6172	4082.96	-1183.16	0.136806	138.723	0.908591		4082.97	16571.6	-1144.86	0.070642	138.734	0.908584		126.69	79.1615	25.6172	126.693	25.7161	12.8518	138.41	0.908797
52	WAT-176	WATDE0323	ear 3	ear 4	167.653	99.8282	21.5722	4705.98	14.7698	13.6124	0.984435	185.609	0.933722		167.565	99.7793	21.1228	4703.05	0.0837674	-111.858	134.118	181.167	0.935308		167.534	99.7565	21.1228	4701.35	-54.9927	1.63877	179.92	0.935753		4701.34	95.0032	-54.9947	0.819361	179.92	0.935753		167.329	99.8409	22.0217	167.329	22.0062	-11.2004	187.871	0.932914
53	WAT-176	WATDE0323	ear 4	ear 5	170.202	111.016	22.7439	5827.99	14.7443	16.3731	0.930213	153.713	0.933247		170.202	111.01	22.26	5823.56	0.0880013	-132.094	155.704	150.03	0.934846		170.166	111.005	22.26	5820.66	-62.2618	2.19421	148.846	0.935361		5820.66	79.0246	-62.2639	1.09708	148.846	0.935361		169.964	111.001	23.2278	169.965	23.1834	13.659	155.2	0.932601
54	WAT-176	WATDE0323	ear 5	ear 6	160.033	104.341	22.5014	5294.47	20.5785	13.3391	0.184422	257.22	0.88482		160.052	104.351	22.5014	5293.01	0.025995	-485.008	507.627	256.913	0.884957		160.076	104.355	22.0326	5292.35	-199.315	0.784973	256.753	0.885029		5292.36	562.748	-198.623	0.393719	256.753	0.885029		160.032	104.341	22.5014	160.032	22.5038	13.1986	257.223	0.884818
55	WAT-176	WATDE0323	ear 6	ear 7	150.279	94.6301	20.9956	4430.42	13.1108	14.7961	1.12161	116.359	0.94061		150.159	94.6025	20.5582	4429.79	0.107813	-88.0404	109.797	111.941	0.942865		150.039	94.5843	20.1208	4428.31	-40.3208	2.27145	110.428	0.943637		4428.31	55.3878	-40.3186	1.13577	110.428	0.943637		149.984	94.6203	21.433	149.987	21.3491	11.7441	119.006	0.939259
56	WAT-176	WATDE0323	ear 7	ear 8	139.485	83.8051	17.8711	3721.72	9.41617	16.6244	2.39819	145.268	0.923831		138.689	83.7539	18.2867	3732.72	0.243067	-24.7842	45.4908	134.561	0.929445		138.223	83.6186	17.8711	3725.94	-6.75104	4.57513	126.143	0.933859		3725.94	12.7102	-6.75106	2.28757	126.143	0.933859		138.078	83.8043	19.9491	138.078	19.9658	10.595	164.516	0.913739
57	WAT-176	WATDE0323	ear 8	ear 9	143.767	88.2736	20.5707	4182.41	11.3004	17.5932	2.14502	138.595	0.929087		143.022	88.2009	20.5707	4190.25	0.216439	-32.1632	55.2818	129.061	0.933965		142.572	88.097	20.5707	4181.54	-11.3781	4.21657	123.671	0.936723		4181.54	17.0592	-11.3782	2.10828	123.671	0.936723		143.085	88.4184	22.3214	143.085	22.3209	-11.4286	155.653	0.920359
58	WAT-196	WATDE0347	ear 1	ear 1	124.203	73.9273	26.1581	5313.02	14.1039	29.9296	4.10802	121.141	0.922688		123.311	73.9844	28.7739	5372.08	0.355735	-17.2735	52.0442	115.868	0.926053		122.65	73.6746	28.1199	5306.64	-1.12386	9.60211	105.64	0.93258		5306.64	8.121	-1.12384	4.80106	105.64	0.93258		123.07	74.3044	32.6976	123.073	32.8113	16.5495	165.722	0.894236
59	WAT-196	WATDE0347	ear 2	ear 2	146.15	85.1343	32.7635	6668.93	18.5286	29.4708	2.77087	224.157	0.905063		145.258	84.9965	33.4916	6717.94	0.284845	-28.6621	67.455	206.713	0.912451		144.446	84.5816	32.7635	6717.97	-2.12085	9.44977	192.525	0.91846		6717.97	9.37005	-2.12074	4.72491	192.525	0.91846		145.566	85.3115	37.132	145.576	37.3366	17.7445	248.936	0.894568
60	WAT-196	WATDE0347	ear 3	ear 3	157.563	90.1174	37.5641	6809.54	26.2709	21.7412	1.13097	177.438	0.93507		157.08	89.9736	36.8418	6841.63	0.12382	-102.379	141.412	169.503	0.937974		156.722	89.8723	36.8418	6852.87	-39.0157	3.99291	166.425	0.9391		6852.87	39.8245	-39.0167	1.99642	166.425	0.9391		157.56	90.153	38.2865	157.57	38.4829	-17.1266	181.167	0.933706
61	WAT-196	WATDE0347	ear 4	ear 4	149.851	81.634	33.8979	5825.25	21.3553	23.2928	2.07555	167.958	0.936522		149.023	81.4002	33.22	5854.17	0.222386	-35.2234	72.2226	154.151	0.94174		148.475	81.1244	33.22	5852.2	-6.50689	6.09158	146.216	0.944739		5852.21	14.9868	-6.50561	3.0459	146.216	0.944739		149.415	81.8276	35.9318	149.428	36.1329	-15.2419	190.225	0.928106
62	WAT-196	WATDE0347	ear 5	ear 5	135.64	78.4621	29.6011	5938.35	16.0574	29.456	3.33232	152.924	0.921736		134.67	78.4021	31.0107	5991.66	0.318558	-22.2144	58.611	142.638	0.927		133.973	78.0624	30.3059	5956.14	-1.66964	9.40347	130.438	0.933244		5956.14	8.77393	-1.66972	4.70172	130.438	0.933244		134.216	78.6088	34.5346	134.233	34.8079	17.1497	195.179	0.900111
63	WAT-196	WATDE0347	ear 6	ear 6	120.507	67.2496	25.3745	3905.19	15.8433	22.6476	4.07962	122.983	0.931331		119.702	67.1684	26.3895	3966.64	0.381283	-5.73037	37.2848	119.771	0.933124		119.135	66.8824	26.3895	3884.72	4.33265	7.23955	113.359	0.936704		3884.73	8.1156	4.33317	3.61988	113.359	0.936704		120.9	68.3724	29.4345	120.921	29.6597	12.0246	171.42	0.904285
64	WAT-196	WATDE0347	ear 7	ear 7	129.162	73.5288	35.6009	5294.68	23.2495	23.5316	1.78587	154.482	0.921051		128.38	73.2379	35.6009	5350.97	0.215254	-40.1414	79.0482	143.483	0.926672		127.814	72.9611	34.9291	5362.01	-7.79026	6.41165	137.956	0.929497		5362.02	15.2884	-7.78902	3.20594	137.956	0.929497		129.448	73.7415	37.616	129.463	37.8499	-15.9475	162.437	0.916985
65	WAT-196	WATDE0347	ear 8	ear 8	119.925	66.2931	26.8007	3885.42	16.8878	21.7199	3.27398	156.633	0.91414		119.197	66.2538	27.8518	3892.96	0.294224	-14.5135	46.2427	147.605	0.919089		118.547	65.94	27.3262	3876.77	1.64445	6.30133	140.285	0.923101		3876.77	10.2303	1.64454	3.15068	140.285	0.923101		120.397	67.1052	30.4793	120.398	30.5145	12.2117	176.131	0.903452
66	WAT-196	WATDE0347	ear 9	ear 9	122.377	68.8426	23.6427	4249.65	15.0021	25.3723	5.53997	123.445	0.931999		121.567	68.8273	25.7921	4427.73	0.486502	-0.558571	33.6159	127.454	0.929791		120.757	68.4463	25.7921	4268.24	7.30576	9.77849	116.989	0.935556		4268.28	5.81219	7.30753	4.88985	116.989	0.935556		122.138	70.1731	30.0907	122.157	30.3164	12.8969	210.761	0.883901
67	WAT-202	WATDE0354	ear 1	ear 1	36.7839	22.7876	32.8126	2417.03	16.8322	48.574	6.12255	7.41207	0.935189		36.5556	22.7732	36.5627	2575.17	0.557927	-6.74237	58.8527	8.78515	0.923183		36.2414	22.6758	37.5002	2422.32	2.98442	18.9355	9.26427	0.918994		2422.32	5.61986	2.98467	9.4678	9.26427	0.918994		35.6096	22.9904	45.0002	35.6114	45.254	26.0141	21.8438	0.809
68	WAT-202	WATDE0354	ear 2	ear 2	26.8651	14.0405	39.5734	1059.57	27.3039	23.1323	1.92286	3.16825	0.95914		26.7361	14.0405	40.2801	1051.57	0.134326	-75.5953	117.868	3.32163	0.957162		26.7171	14.0458	40.2801	1048.2	-44.275	2.88103	3.35028	0.956793		1048.2	60.687	-44.2701	1.4406	3.35028	0.956793		26.7289	14.1942	41.6934	26.7305	41.5236	15.5171	3.83712	0.950514
69	WAT-202	WATDE0354	ear 3	ear 3	43.7465	26.0511	30.2301	3008.38	16.8833	52.367	8.61053	13.4801	0.923788		43.983	25.9791	35.4422	3401.83	0.732779	2.73496	55.0631	15.5387	0.912149		43.2572	25.8171	35.4422	3089.59	9.95259	26.5931	15.4336	0.912743		3089.59	3.94338	9.95259	13.2965	15.4336	0.912743		41.5776	26.2487	47.9512	41.5822	47.5327	28.125	44.2374	0.749896
70	WAT-202	WATDE0354	ear 4	ear 4	35.5651	23.0518	30.073	2662.45	15.9325	57.3575	9.42116	12.5785	0.887825		35.6727	22.9192	33.9534	3293.75	0.868465	4.80376	61.8431	14.4007	0.871574		35.1238	22.7404	34.9235	2811.43	11.2481	34.5628	14.4547	0.871094		2811.45	3.3506	11.2483	17.2818	14.4547	0.871094		34.3776	23.3427	47.5348	34.381	47.9335	29.0234	34.0213	0.696599
71	WAT-202	WATDE0354	ear 5	ear 5	43.3935	25.9265	32.0088	2934.3	16.4279	50.4685	6.72517	14.6403	0.915317		43.2351	25.9206	36.139	3136.79	0.579616	-5.84681	59.0676	16.4523	0.904835		42.7729	25.7691	37.1715	2964.6	4.72753	21.2545	16.1777	0.906424		2964.6	5.03731	4.7275	10.6272	16.1777	0.906424		41.5854	26.02	46.4644	41.5857	46.5793	27.5482	35.8304	0.792748
72	WAT-202	WATDE0354	ear 6	ear 6	38.9897	25.0588	26.5602	2459.95	12.575	47.5602	7.5222	14.6187	0.885449		39.0053	24.9703	29.9873	2762.43	0.69683	-2.13125	51.683	16.0743	0.874043		38.5524	24.8159	30.8441	2506.64	4.95317	22.7511	16.1523	0.873432		2506.64	4.24861	4.95318	11.3756	16.1523	0.873432		37.4611	25.1986	40.2686	37.4651	39.8955	25.3285	34.4921	0.729723
73	WAT-202	WATDE0354	ear 7	ear 7	35.1719	19.0724	30.8591	1990.43	19.3974	43.1388	8.71456	5.8052	0.951185		35.2448	19.0636	34.7165	2215.33	0.704793	6.64831	45.6035	8.4411	0.92902		34.5898	18.9533	35.6809	2029.62	12.2144	20.3425	8.98002	0.924488		2029.63	4.29763	12.2148	10.1717	8.98002	0.924488		33.0044	19.5049	45.3243	33.0074	45.0031	23.779	23.8274	0.799638
74	WAT-325	WATDE0045	ear 1	ear 1	45.9452	31.3314	38.2817	4208.48	16.1276	68.0781	6.45427	20.9395	0.875157		45.8946	31.3109	42.7854	4541.67	0.592301	-12.7039	79.4262	19.3845	0.884428		45.5127	31.1383	42.7854	4273.97	2.88263	30.7614	17.1606	0.897687		4273.97	4.61711	2.88265	15.3807	17.1606	0.897687		45.9665	31.3306	55.1706	45.9674	54.9663	33.8978	31.6715	0.811172
75	WAT-325	WATDE0045	ear 2	ear 2	30.216	21.3903	32.5035	2886.29	14.7224	73.4389	9.99368	10.5979	0.855446		30.3315	21.2503	36.6975	3791.05	0.936797	2.73274	82.5411	10.6069	0.855323		29.866	21.0286	36.6975	3187.54	11.3345	52.6907	9.97802	0.863901		3187.54	2.94622	11.3345	26.3454	9.97802	0.863901		30.0137	21.5191	53.4735	30.0146	53.2138	34.3696	23.8152	0.675164
76	WAT-325	WATDE0045	ear 3	ear 3	34.6846	21.8497	32.5223	2706.78	19.8082	60.595	12.2142	14.6863	0.879834		34.8606	21.6899	35.5712	3937.76	1.0895	12.9092	74.8757	18.0459	0.852345		34.2065	21.5443	36.5875	2968.79	17.0906	43.2215	17.862	0.853849		2871.27	3.29525	15.0699	18.4496	18.3229	0.850078		33.727	22.3889	52.8487	33.73	53.2422	29.4407	37.3534	0.694367
77	WAT-325	WATDE0045	ear 4	ear 4	40.2268	27.8573	39.0136	3798.01	16.5204	70.3743	6.64381	34.4601	0.768616		40.0771	27.8249	43.4723	4208.76	0.640016	-9.70632	80.338	33.7623	0.773302		39.708	27.6394	43.4723	3918.49	5.15298	34.9846	31.4469	0.788849		3918.49	4.18157	5.15298	17.4923	31.4469	0.788849		40.4212	27.9298	56.8484	40.4256	56.3411	34.3061	42.11	0.717251
78	WAT-325	WATDE0045	ear 5	ear 5	49.5002	37.15	11.8784	5281.68	7.6547	85.013	71.4383	76.7943	0.62746		50.4489	37.5294	29.156	7777.51	1.09788	-1.0024	102.337	83.9832	0.592585		49.8893	37.4082	32.3956	5547.95	2.94968	50.4941	81.3291	0.605461		5548.1	3.18585	2.95048	25.2494	81.3291	0.605461		49.0737	37.612	48.5933	49.0751	48.8971	40.5503	107.681	0.477622
79	WAT-325	WATDE0045	ear 6	ear 6	37.7142	21.4946	31.8555	2234.65	19.2009	44.8424	7.89367	5.80971	0.958626		37.7806	21.4137	34.6663	2545.42	0.738974	6.89565	47.7912	7.77362	0.94464		37.1477	21.2934	35.6032	2302.83	12.8948	23.0065	7.59564	0.945907		2302.84	3.9586	12.895	11.5035	7.59564	0.945907		36.0281	21.8268	45.9094	36.0286	45.789	23.8172	28.2056	0.799132
80	WAT-325	WATDE0045	ear 7	ear 7	39.6428	27.2421	22.8934	3586.72	11.4864	71.0038	16.7004	31.7885	0.77314		39.9668	27.1927	30.5245	5114.63	1.07012	3.61022	84.5784	36.3119	0.740858		39.2963	27.1061	32.7048	3853.4	7.54064	45.6229	33.4166	0.76152		3853.43	3.11221	7.54078	22.812	33.4166	0.76152		38.5357	27.408	50.1474	38.5363	49.9495	35.3856	56.2405	0.598636
81	WAT-325	WATDE0045	ear 8	ear 8	33.4802	20.3969	45.4967	1900.5	30.2681	28.6246	1.14099	15.7824	0.865341		33.3494	20.3752	44.6218	1913.57	0.134618	-124.293	171.562	15.4373	0.868285		33.2658	20.357	43.7469	1918.53	-46.2366	5.82755	15.2935	0.869512		1918.53	32.8396	-46.2361	2.91379	15.2935	0.869512		33.5057	20.3976	46.3717	33.5058	46.3142	22.4479	15.9405	0.863992
82	WAT-548	WATDE0748	ear 1	ear 1	59.6574	36.3496	36.0298	3129.02	12.9444	39.3919	7.19818	37.0537	0.892507		59.2621	36.3259	40.5335	3446.69	0.643501	-1.57517	44.351	43.109	0.87494		58.5604	36.1104	41.6595	3220.53	6.33164	19.3168	40.5841	0.882265		3210.38	4.36395	5.87778	9.38557	40.5674	0.882313		57.4997	36.6477	52.9188	57.5065	36.4543	20.9574	79.1589	0.770359
83	WAT-548	WATDE0748	ear 2	ear 2	58.4956	36.0162	41.94	3438.34	17.7502	41.4023	4.27695	23.4918	0.926678		58.0521	35.9454	44.037	3566.74	0.450424	-13.0007	60.2197	23.1241	0.927826		57.6594	35.8122	45.0855	3454.28	0.887734	15.0247	21.8759	0.931722		3454.28	6.71637	0.887732	7.51233	21.8759	0.931722		57.6894	36.1617	52.425	57.6932	42.8736	22.6816	45.1052	0.859219
84	WAT-548	WATDE0748	ear 3	ear 3	67.6915	42.1305	30.4896	4093.4	13.9505	46.1938	9.01048	29.1725	0.931865		68.0271	41.9738	34.5549	4869.3	0.813959	3.75276	48.8597	31.7261	0.925901		66.8342	41.7665	35.5712	4308.4	9.59828	27.0324	29.5068	0.931085		4308.39	3.45505	9.59816	13.5161	29.5068	0.931085		65.1833	42.3846	48.7834	65.1843	40.5689	23.7716	112.611	0.736988
85	WAT-548	WATDE0748	ear 4	ear 4	59.9466	36.1807	37.899	3552.63	17.5545	45.45	9.58886	26.2227	0.929516		59.7892	36.1414	43.4723	4177.2	0.776913	6.32159	48.5103	33.4457	0.910101		59.0464	35.9811	45.7017	3657.76	11.406	22.9362	32.2751	0.913248		3657.76	3.96944	11.406	11.4681	32.2751	0.913248		58.5619	36.9639	57.9631	58.5636	43.6289	22.4938	79.2476	0.78699
86	WAT-548	WATDE0748	ear 5	ear 5	54.8085	36.7258	38.8747	3871.15	15.0716	52.8929	6.96999	37.9571	0.865466		54.6564	36.696	44.2739	4221.09	0.614702	-5.77993	60.5393	37.4496	0.867265		54.2369	36.4892	45.3538	3925.24	5.03148	23.8085	34.1084	0.879107		3925.23	4.59176	5.03119	11.9041	34.1084	0.879107		55.2986	36.9632	56.1523	55.3006	45.0516	25.236	56.4854	0.799796
87	WAT-720	WATDE0930	ear 1	ear 1	48.5209	28.384	16.1727	2937.82	10.8923	47.9837	28.9547	20.1364	0.9093		51.1573	28.4288	19.9781	4445.89	1.27056	7.92837	61.1642	31.6107	0.857616		47.8224	28.5007	23.7834	3141.93	7.50037	30.8577	32.8701	0.851943		3224.56	2.66139	9.48629	18.4725	28.9544	0.869581		43.6838	28.7581	38.0535	43.684	37.9794	27.9321	83.4887	0.623942
88	WAT-720	WATDE0930	ear 2	ear 2	50.057	27.3701	22.4398	2537.41	14.3699	39.3294	12.0007	21.6927	0.917198		51.2921	27.344	25.029	3086.23	0.924406	8.32996	39.8046	26.2859	0.899666		49.8115	27.0668	25.892	2680.64	12.1825	25.5433	27.2605	0.895946		2680.62	3.05404	12.1823	12.7713	27.2605	0.895946		45.8916	27.6033	37.975	45.8987	37.5912	21.9156	83.9632	0.679509
89	WAT-720	WATDE0930	ear 3	ear 3	41.2361	21.9556	24.2143	2141.56	17.9229	40.8095	17.5703	10.0467	0.945902		41.4228	22.158	31.389	2438.65	0.752926	7.92386	41.4159	15.6148	0.91592		40.8715	21.9094	30.4921	2245.05	14.9478	23.7417	13.8666	0.925333		2245.05	3.34664	14.9478	11.8709	13.8666	0.925333		39.0295	22.4802	42.1509	39.0297	42.2207	21.4012	39.8168	0.785601
90	WAT-720	WATDE0930	ear 4	ear 4	46.431	26.6753	24.8825	2549.39	15.7588	42.5997	12.0085	12.9635	0.941458		47.1919	26.6268	28.3146	3136	0.907149	8.79895	44.0981	15.6221	0.929452		45.9694	26.5206	29.1726	2664.49	11.9255	24.366	15.4803	0.930092		2704.94	3.12722	13.1972	13.5789	15.4629	0.93017		43.7815	26.9996	40.3268	43.7835	40.5405	22.3581	63.266	0.714295
91	WAT-720	WATDE0930	ear 5	ear 5	35.8771	18.8207	26.5517	1722.72	19.5799	37.5517	14.9135	13.32	0.911748		36.6296	18.7893	29.8707	2210.66	0.994186	14.7099	39.6836	17.6176	0.883274		35.2267	18.8059	31.5302	1799.49	15.6453	20.8634	18.149	0.879753		1828.24	3.1066	17.3072	11.9933	17.3339	0.885154		33.4061	19.4868	41.4871	33.4122	41.8706	20.0906	40.9243	0.728855
92	WAT-720	WATDE0930	ear 6	ear 6	49.122	26.3737	23.3478	2471.73	16.36	39.4474	16.3232	9.79517	0.96181		50.2717	26.4335	26.8068	3065.8	0.948214	10.8111	40.2104	16.143	0.937061		48.7955	26.2874	28.5362	2604.4	13.7225	24.0817	14.5158	0.943405		2604.4	3.2058	13.7225	12.0408	14.5158	0.943405		45.9182	26.733	39.7778	45.9193	39.6348	20.9478	66.8831	0.739234
93	WAT-720	WATDE0930	ear 7	ear 7	50.9957	31.4773	22.9359	3547.54	13.3234	54.5274	16.1295	15.9746	0.932693		51.7984	31.5347	29.9163	4340.16	0.889404	4.3553	55.8142	20.6115	0.913156		50.819	31.2731	29.9163	3770.61	10.5059	34.5319	18.3681	0.922608		3770.61	3.1112	10.5059	17.266	18.3681	0.922608		48.4927	31.7144	44.8745	48.4988	44.4236	28.3855	68.5888	0.71101

## Sheet: S11 Volume traits
order	Variety ID	GRU code	spike ID	original_ears_ID	V (mm3) (by Artec studio software)	AUC-V (mm3)	Voxel-V (mm3)
1	paragon	paragon	ear 1	ear 1	3900.93	3901.19	3900.93
2	paragon	paragon	ear 2	ear 2	5877.01	5879.32	5877.01
3	paragon	paragon	ear 3	ear 3	6703.99	6705.22	6703.99
4	paragon	paragon	ear 4	ear 4	5729.82	5726.65	5729.82
5	paragon	paragon	ear 5	ear 5	5413.6	5412.03	5413.6
6	paragon	paragon	ear 6	ear 6	4243.8	4243.19	4243.8
7	paragon	paragon	ear 7	ear 7	6240.2	6235.21	6240.2
8	paragon	paragon	ear 8	ear 8	6515.28	6509.8	6515.28
9	WAT-93	WATDE0227	ear 1	ear 1	2495.42	2413.73	2412.64
10	WAT-93	WATDE0227	ear 2	ear 2	2442.53	2444.57	2442.53
11	WAT-93	WATDE0227	ear 3	ear 3	2233.2	2234.34	2233.2
12	WAT-93	WATDE0227	ear 4	ear 4	2397.79	2399.38	2397.79
13	WAT-93	WATDE0227	ear 5	ear 5	3802.73	3807.22	3802.73
14	WAT-93	WATDE0227	ear 6	ear 6	3180.27	3175.98	3180.27
15	WAT-93	WATDE0227	ear 7	ear 7	2507.84	2510.99	2507.84
16	WAT-93	WATDE0227	ear 8	ear 8	3340.49	3342.71	3340.49
17	WAT-93	WATDE0227	ear 9	ear 9	4513.9	4512.59	4513.9
18	WAT-94	WATDE0228	ear 1	ear 1	2225.69	2223.92	2225.69
19	WAT-94	WATDE0228	ear 2	ear 2	2334.42	2369.08	2334.42
20	WAT-94	WATDE0228	ear 3	ear 3	3883.84	3880.76	3883.84
21	WAT-94	WATDE0228	ear 4	ear 4	2012.88	2011.5	2012.88
22	WAT-94	WATDE0228	ear 5	ear 5	3533.85	3531.8	3533.85
23	WAT-94	WATDE0228	ear 6	ear 6	2626.22	2646.48	2626.22
24	WAT-94	WATDE0228	ear 7	ear 7	2259.42	2257.81	2259.42
25	WAT-94	WATDE0228	ear 8	ear 8	2825.67	2824.29	2825.67
26	WAT-94	WATDE0228	ear 9	ear 9	3902.84	3903.5	3902.84
27	WAT-117	WATDE0253	ear 1	ear 1	3565.02	3568.34	3565.02
28	WAT-117	WATDE0253	ear 2	ear 2	3954.74	3953.55	3954.74
29	WAT-117	WATDE0253	ear 3	ear 3	3027.52	3028.31	3027.52
30	WAT-117	WATDE0253	ear 4	ear 4	3324.37	3322.47	3324.37
31	WAT-117	WATDE0253	ear 5	ear 5	3359.62	3357.24	3359.62
32	WAT-117	WATDE0253	ear 6	ear 6	2994.3	2992.2	2994.3
33	WAT-117	WATDE0253	ear 7	ear 7	2744.23	2740.93	2744.23
34	WAT-149	WATDE0020	ear 1	ear 1	4704.11	4699.27	4704.11
35	WAT-149	WATDE0020	ear 2	ear 2	4803.75	4804.05	4803.75
36	WAT-149	WATDE0020	ear 3	ear 3	4021.58	4019.38	4021.58
37	WAT-149	WATDE0020	ear 4	ear 4	3212.55	3210.2	3212.55
38	WAT-149	WATDE0020	ear 5	ear 5	5038.66	4950.67	4950.09
39	WAT-149	WATDE0020	ear 6	ear 6	2628.46	2634.72	2628.46
40	WAT-149	WATDE0020	ear 7	ear 7	2595.55	2597.43	2595.55
41	WAT-156	WATDE0296	ear 1	ear 2	5775.84	5772.46	5775.84
42	WAT-156	WATDE0296	ear 2	ear 3	3485.64	3486.12	3485.64
43	WAT-156	WATDE0296	ear 3	ear 4	4518.86	4514.48	4518.86
44	WAT-156	WATDE0296	ear 4	ear 5	4075.05	4078.83	4075.05
45	WAT-156	WATDE0296	ear 5	ear 6	5249.78	5251.48	5249.78
46	WAT-156	WATDE0296	ear 6	ear 7	5590.16	5592.07	5590.16
47	WAT-156	WATDE0296	ear 7	ear 8	5207.43	5208.64	5207.43
48	WAT-156	WATDE0296	ear 8	ear 9	4224.94	4228.07	4224.94
49	WAT-176	WATDE0323	ear 1	ear 1	4817.4	4816.86	4817.4
51	WAT-176	WATDE0323	ear 2	ear 3	3780.38	3781.1	3780.38
52	WAT-176	WATDE0323	ear 3	ear 4	4430.82	4432.68	4430.82
53	WAT-176	WATDE0323	ear 4	ear 5	5330.68	5329.83	5330.68
54	WAT-176	WATDE0323	ear 5	ear 6	4842.54	4844.11	4842.54
55	WAT-176	WATDE0323	ear 6	ear 7	4099.65	4100.09	4099.65
56	WAT-176	WATDE0323	ear 7	ear 8	3441.88	3444.33	3441.89
57	WAT-176	WATDE0323	ear 8	ear 9	3819.64	3823.12	3819.64
58	WAT-196	WATDE0347	ear 1	ear 1	4785.15	4789.07	4785.15
59	WAT-196	WATDE0347	ear 2	ear 2	6096.21	6097.62	6096.21
60	WAT-196	WATDE0347	ear 3	ear 3	6399.58	6402.42	6399.58
61	WAT-196	WATDE0347	ear 4	ear 4	5432.85	5435.06	5432.85
62	WAT-196	WATDE0347	ear 5	ear 5	5447.44	5451.12	5447.44
63	WAT-196	WATDE0347	ear 6	ear 6	3394.01	3396.71	3394.01
64	WAT-196	WATDE0347	ear 7	ear 7	4859.12	4857.31	4859.12
65	WAT-196	WATDE0347	ear 8	ear 8	3440.65	3442.22	3440.65
66	WAT-196	WATDE0347	ear 9	ear 9	3686.84	3691.09	3686.84
67	WAT-202	WATDE0354	ear 1	ear 1	2147.93	2149.72	2147.93
68	WAT-202	WATDE0354	ear 2	ear 2	1022.44	1021.37	1022.44
69	WAT-202	WATDE0354	ear 3	ear 3	2734.33	2733.68	2734.33
70	WAT-202	WATDE0354	ear 4	ear 4	2251.31	2249.12	2251.31
71	WAT-202	WATDE0354	ear 5	ear 5	2682.46	2680	2682.46
72	WAT-202	WATDE0354	ear 6	ear 6	2149.43	2148.76	2149.43
73	WAT-202	WATDE0354	ear 7	ear 7	1879.68	1875.77	1879.68
74	WAT-325	WATDE0045	ear 1	ear 1	3512.4	3511.61	3512.4
75	WAT-325	WATDE0045	ear 2	ear 2	2248.18	2245.96	2248.18
76	WAT-325	WATDE0045	ear 3	ear 3	2203.36	2246.98	2272.88
77	WAT-325	WATDE0045	ear 4	ear 4	3088.2	3084.32	3088.2
78	WAT-325	WATDE0045	ear 5	ear 5	4049.54	4048.2	4049.54
79	WAT-325	WATDE0045	ear 6	ear 6	2049.08	2047.84	2049.08
80	WAT-325	WATDE0045	ear 7	ear 7	2986.48	2986.07	2986.48
81	WAT-325	WATDE0045	ear 8	ear 8	1782.15	1782.75	1782.15
82	WAT-548	WATDE0748	ear 1	ear 1	2796.57	2794.53	2796.57
83	WAT-548	WATDE0748	ear 2	ear 2	3080.63	3080.96	3080.63
84	WAT-548	WATDE0748	ear 3	ear 3	3570.95	3576.06	3570.95
85	WAT-548	WATDE0748	ear 4	ear 4	3089.97	3092.76	3089.97
86	WAT-548	WATDE0748	ear 5	ear 5	3159.04	3157.54	3159.04
87	WAT-720	WATDE0930	ear 1	ear 1	2737.61	2738.15	2737.61
88	WAT-720	WATDE0930	ear 2	ear 2	2386.63	2385.92	2386.63
89	WAT-720	WATDE0930	ear 3	ear 3	2002.51	2003.28	2002.51
90	WAT-720	WATDE0930	ear 4	ear 4	2309.35	2308.95	2309.35
91	WAT-720	WATDE0930	ear 5	ear 5	1592.3	1593.51	1592.3
92	WAT-720	WATDE0930	ear 6	ear 6	2311.75	2311.89	2311.75
93	WAT-720	WATDE0930	ear 7	ear 7	3159.5	3160.07	3159.5

## Sheet: S12 between Trait Ratios
order	Variety ID	GRU code	spike ID	original_ears_ID	AUC_V/SL	W/SL	W/AUC_V	W/NSPS	NSPS/SL	AUC_V/NSPS
1	paragon	paragon	ear 1	ear 1	0.0430794	0.0241834	0.561368	0.0995455	0.242938	177.327
2	paragon	paragon	ear 2	ear 2	0.0517824	0.0214904	0.415014	0.0938462	0.228996	226.128
3	paragon	paragon	ear 3	ear 3	0.0617186	0.0275216	0.445921	0.106786	0.257727	239.472
4	paragon	paragon	ear 4	ear 4	0.0548118	0.024407	0.445287	0.102	0.239284	229.066
5	paragon	paragon	ear 5	ear 5	0.0532373	0.0253791	0.476716	0.0992308	0.255758	208.155
6	paragon	paragon	ear 6	ear 6	0.0456212	0.0202131	0.443063	0.0783333	0.258039	176.799
7	paragon	paragon	ear 7	ear 7	0.0574147	0.0302948	0.527649	0.1316	0.230204	249.408
8	paragon	paragon	ear 8	ear 8	0.0616354	0.0300139	0.486958	0.121923	0.246171	250.377
9	WAT-93	WATDE0227	ear 1	ear 1	0.0272037	0.00946711	0.348008	0.042	0.225407	120.687
10	WAT-93	WATDE0227	ear 2	ear 2	0.028528	0.0105029	0.368163	0.045	0.233399	122.229
11	WAT-93	WATDE0227	ear 3	ear 3	0.0250747	0.00886572	0.353572	0.0395	0.224449	111.717
12	WAT-93	WATDE0227	ear 4	ear 4	0.0266592	0.00811093	0.304245	0.0365	0.222217	119.969
13	WAT-93	WATDE0227	ear 5	ear 5	0.0390087	0.0150616	0.386108	0.0735	0.204919	190.361
14	WAT-93	WATDE0227	ear 6	ear 6	0.0324197	0.0123514	0.380985	0.057619	0.214363	151.237
15	WAT-93	WATDE0227	ear 7	ear 7	0.028364	0.0105052	0.370371	0.0465	0.225919	125.55
16	WAT-93	WATDE0227	ear 8	ear 8	0.0327537	0.0162656	0.496603	0.0691667	0.235165	139.28
17	WAT-93	WATDE0227	ear 9	ear 9	0.0440617	0.0161109	0.365643	0.0634615	0.253869	173.561
18	WAT-94	WATDE0228	ear 1	ear 1	0.0262284	0.00825562	0.314759	0.0318182	0.259462	101.087
19	WAT-94	WATDE0228	ear 2	ear 2	0.0275325	0.00871619	0.316578	0.0340909	0.255675	107.686
20	WAT-94	WATDE0228	ear 3	ear 3	0.0358057	0.0108872	0.304064	0.0491667	0.221435	161.698
21	WAT-94	WATDE0228	ear 4	ear 4	0.0252931	0.00729304	0.288341	0.027619	0.264058	95.786
22	WAT-94	WATDE0228	ear 5	ear 5	0.0366788	0.0095545	0.260491	0.04	0.238863	153.556
23	WAT-94	WATDE0228	ear 6	ear 6	0.0288373	0.00806342	0.279617	0.0321739	0.25062	115.064
24	WAT-94	WATDE0228	ear 7	ear 7	0.026474	0.00773885	0.292319	0.03	0.257962	102.628
25	WAT-94	WATDE0228	ear 8	ear 8	0.0336411	0.0101247	0.300961	0.0386364	0.26205	128.377
26	WAT-94	WATDE0228	ear 9	ear 9	0.0368409	0.0119861	0.325349	0.0529167	0.22651	162.646
27	WAT-117	WATDE0253	ear 1	ear 1	0.0365066	0.0210753	0.5773	0.103	0.204614	178.417
28	WAT-117	WATDE0253	ear 2	ear 2	0.0361074	0.0218277	0.604521	0.108636	0.200924	179.707
29	WAT-117	WATDE0253	ear 3	ear 3	0.0333905	0.0191855	0.574577	0.087	0.220522	151.416
30	WAT-117	WATDE0253	ear 4	ear 4	0.0353074	0.0212537	0.601962	0.105263	0.20191	174.867
31	WAT-117	WATDE0253	ear 5	ear 5	0.036601	0.0195148	0.533176	0.0895	0.218042	167.862
32	WAT-117	WATDE0253	ear 6	ear 6	0.0332523	0.0188921	0.568144	0.085	0.22226	149.61
33	WAT-117	WATDE0253	ear 7	ear 7	0.0307522	0.0178392	0.580095	0.0836842	0.213172	144.259
34	WAT-149	WATDE0020	ear 1	ear 1	0.0500549	0.0227945	0.45539	0.0792593	0.287594	174.047
35	WAT-149	WATDE0020	ear 2	ear 2	0.0574612	0.0238024	0.414234	0.0796	0.299025	192.162
36	WAT-149	WATDE0020	ear 3	ear 3	0.0462516	0.0196772	0.425439	0.0657692	0.299185	154.592
37	WAT-149	WATDE0020	ear 4	ear 4	0.0473006	0.0246065	0.520216	0.0759091	0.324158	145.918
38	WAT-149	WATDE0020	ear 5	ear 5	0.0652978	0.0323147	0.494883	0.102083	0.316553	206.278
39	WAT-149	WATDE0020	ear 6	ear 6	0.0386199	0.0148047	0.383343	0.0459091	0.322478	119.76
40	WAT-149	WATDE0020	ear 7	ear 7	0.0397032	0.0189541	0.477396	0.0590476	0.320997	123.687
41	WAT-156	WATDE0296	ear 1	ear 2	0.0709657	0.0368816	0.51971	0.142857	0.258171	274.879
42	WAT-156	WATDE0296	ear 2	ear 3	0.0387797	0.0223593	0.576572	0.105789	0.211356	183.48
43	WAT-156	WATDE0296	ear 3	ear 4	0.0566453	0.0313687	0.553774	0.119048	0.263497	214.975
44	WAT-156	WATDE0296	ear 4	ear 5	0.0552599	0.0317023	0.573694	0.117	0.27096	203.941
45	WAT-156	WATDE0296	ear 5	ear 6	0.0655294	0.0345648	0.52747	0.131905	0.262043	250.071
46	WAT-156	WATDE0296	ear 6	ear 7	0.0561438	0.0334328	0.595486	0.158571	0.210838	266.289
47	WAT-156	WATDE0296	ear 7	ear 8	0.0613791	0.0305208	0.497251	0.1295	0.235682	260.432
48	WAT-156	WATDE0296	ear 8	ear 9	0.0506329	0.0275435	0.543984	0.109524	0.251484	201.336
49	WAT-176	WATDE0323	ear 1	ear 1	0.0863929	0.0538066	0.622813	0.125	0.430453	200.702
51	WAT-176	WATDE0323	ear 2	ear 3	0.0767737	0.0479188	0.624156	0.107273	0.4467	171.868
52	WAT-176	WATDE0323	ear 3	ear 4	0.0938899	0.0626967	0.667768	0.140952	0.444807	211.08
53	WAT-176	WATDE0323	ear 4	ear 5	0.104738	0.0713345	0.681073	0.157826	0.451982	231.732
54	WAT-176	WATDE0323	ear 5	ear 6	0.0995159	0.0665616	0.668854	0.135	0.493049	201.838
55	WAT-176	WATDE0323	ear 6	ear 7	0.0922078	0.0620703	0.673157	0.125455	0.494763	186.368
56	WAT-176	WATDE0323	ear 7	ear 8	0.083151	0.0555252	0.667763	0.115	0.482828	172.217
57	WAT-176	WATDE0323	ear 8	ear 9	0.0814956	0.0524386	0.643453	0.1025	0.511596	159.297
58	WAT-196	WATDE0347	ear 1	ear 1	0.0720896	0.0337186	0.467732	0.0772414	0.436535	165.14
59	WAT-196	WATDE0347	ear 2	ear 2	0.0831047	0.0429315	0.516595	0.105	0.408871	203.254
60	WAT-196	WATDE0347	ear 3	ear 3	0.0887975	0.0434111	0.488877	0.107931	0.402211	220.773
61	WAT-196	WATDE0347	ear 4	ear 4	0.0805793	0.0394368	0.489415	0.0917241	0.42995	187.416
62	WAT-196	WATDE0347	ear 5	ear 5	0.0763774	0.0372701	0.487973	0.0917241	0.406328	187.97
63	WAT-196	WATDE0347	ear 6	ear 6	0.0626789	0.0310008	0.494597	0.0730435	0.424415	147.683
64	WAT-196	WATDE0347	ear 7	ear 7	0.0723986	0.0338345	0.467337	0.0840741	0.402437	179.9
65	WAT-196	WATDE0347	ear 8	ear 8	0.065057	0.0330745	0.508393	0.0833333	0.396895	163.915
66	WAT-196	WATDE0347	ear 9	ear 9	0.0670888	0.0323531	0.482242	0.0741667	0.436221	153.795
67	WAT-202	WATDE0354	ear 1	ear 1	0.0225422	0.012793	0.567516	0.0530435	0.24118	93.4661
68	WAT-202	WATDE0354	ear 2	ear 2	0.0148818	0.00917942	0.61682	0.0331579	0.27684	53.7562
69	WAT-202	WATDE0354	ear 3	ear 3	0.0265676	0.0158414	0.596266	0.0652	0.242966	109.347
70	WAT-202	WATDE0354	ear 4	ear 4	0.0230511	0.0117863	0.511311	0.05	0.235726	97.7878
71	WAT-202	WATDE0354	ear 5	ear 5	0.0262436	0.0151782	0.578359	0.062	0.24481	107.2
72	WAT-202	WATDE0354	ear 6	ear 6	0.0246887	0.014592	0.591039	0.0604762	0.241285	102.322
73	WAT-202	WATDE0354	ear 7	ear 7	0.0204825	0.0121206	0.591756	0.0482609	0.251149	81.5553
74	WAT-325	WATDE0045	ear 1	ear 1	0.0306665	0.0200856	0.654971	0.0958333	0.209589	146.317
75	WAT-325	WATDE0045	ear 2	ear 2	0.0214648	0.0124242	0.578817	0.0565217	0.219813	97.6504
76	WAT-325	WATDE0045	ear 3	ear 3	0.0269081	0.0156875	0.583004	0.0545833	0.287405	93.6243
77	WAT-325	WATDE0045	ear 4	ear 4	0.028832	0.0203785	0.706801	0.0947826	0.215002	134.101
78	WAT-325	WATDE0045	ear 5	ear 5	0.0338205	0.0200507	0.592856	0.096	0.208861	161.928
79	WAT-325	WATDE0045	ear 6	ear 6	0.0218981	0.0152914	0.698297	0.0621739	0.245945	89.0364
80	WAT-325	WATDE0045	ear 7	ear 7	0.0262504	0.0191643	0.730056	0.0908333	0.210983	124.42
81	WAT-325	WATDE0045	ear 8	ear 8	0.021351	0.0149705	0.701162	0.0543478	0.275457	77.511
82	WAT-548	WATDE0748	ear 1	ear 1	0.0355567	0.0230299	0.647695	0.113125	0.203579	174.658
83	WAT-548	WATDE0748	ear 2	ear 2	0.0357965	0.0223078	0.623183	0.12	0.185898	192.56
84	WAT-548	WATDE0748	ear 3	ear 3	0.0412346	0.025137	0.609609	0.121111	0.207553	198.67
85	WAT-548	WATDE0748	ear 4	ear 4	0.0358917	0.0214693	0.598171	0.108824	0.197286	181.927
86	WAT-548	WATDE0748	ear 5	ear 5	0.0370842	0.0229021	0.617569	0.114706	0.199659	185.738
87	WAT-720	WATDE0930	ear 1	ear 1	0.0283825	0.0140972	0.496685	0.0523077	0.269505	105.314
88	WAT-720	WATDE0930	ear 2	ear 2	0.0268705	0.0118252	0.440082	0.042	0.281553	95.4368
89	WAT-720	WATDE0930	ear 3	ear 3	0.0242834	0.0140613	0.57905	0.0446154	0.315167	77.0493
90	WAT-720	WATDE0930	ear 4	ear 4	0.0276397	0.0134072	0.485069	0.0466667	0.287296	96.2063
91	WAT-720	WATDE0930	ear 5	ear 5	0.02141	0.0115548	0.53969	0.0344	0.335895	63.7403
92	WAT-720	WATDE0930	ear 6	ear 6	0.0272759	0.0158094	0.579611	0.0536	0.294952	92.4758
93	WAT-720	WATDE0930	ear 7	ear 7	0.031393	0.013908	0.443028	0.0583333	0.238422	131.67

## Sheet: S13 Weigth & NSPS
order	Variety ID	GRU code	spike ID	original_ears_ID	W	NDSPS	NSPS	NBAS
1	paragon	paragon	ear 1	ear 1	2.19	17	22	5
2	paragon	paragon	ear 2	ear 2	2.44	23	26	3
3	paragon	paragon	ear 3	ear 3	2.99	24	28	4
4	paragon	paragon	ear 4	ear 4	2.55	22	25	3				W : Weight in mg
5	paragon	paragon	ear 5	ear 5	2.58	22	26	4				NDSP : Number of Develobbed Spikelets per Spike
6	paragon	paragon	ear 6	ear 6	1.88	19	24	5				NSPS : Number of Spikelets per Spike
7	paragon	paragon	ear 7	ear 7	3.29	22	25	3				NBAS : Number of Basal Aborted Spikelets per Spike
8	paragon	paragon	ear 8	ear 8	3.17	23	26	3
9	WAT-93	WATDE0227	ear 1	ear 1	0.84	17	20	3
10	WAT-93	WATDE0227	ear 2	ear 2	0.9	17	20	3
11	WAT-93	WATDE0227	ear 3	ear 3	0.79	16	20	4
12	WAT-93	WATDE0227	ear 4	ear 4	0.73	18	20	2
13	WAT-93	WATDE0227	ear 5	ear 5	1.47	19	20	1
14	WAT-93	WATDE0227	ear 6	ear 6	1.21	19	21	2
15	WAT-93	WATDE0227	ear 7	ear 7	0.93	18	20	2
16	WAT-93	WATDE0227	ear 8	ear 8	1.66	22	24	2
17	WAT-93	WATDE0227	ear 9	ear 9	1.65	22	26	4
18	WAT-94	WATDE0228	ear 1	ear 1	0.7	19	22	3
19	WAT-94	WATDE0228	ear 2	ear 2	0.75	19	22	3
20	WAT-94	WATDE0228	ear 3	ear 3	1.18	23	24	1
21	WAT-94	WATDE0228	ear 4	ear 4	0.58	18	21	3
22	WAT-94	WATDE0228	ear 5	ear 5	0.92	22	23	1
23	WAT-94	WATDE0228	ear 6	ear 6	0.74	21	23	2
24	WAT-94	WATDE0228	ear 7	ear 7	0.66	20	22	2
25	WAT-94	WATDE0228	ear 8	ear 8	0.85	20	22	2
26	WAT-94	WATDE0228	ear 9	ear 9	1.27	23	24	1
27	WAT-117	WATDE0253	ear 1	ear 1	2.06	18	20	2
28	WAT-117	WATDE0253	ear 2	ear 2	2.39	20	22	2
29	WAT-117	WATDE0253	ear 3	ear 3	1.74	17	20	3
30	WAT-117	WATDE0253	ear 4	ear 4	2	17	19	2
31	WAT-117	WATDE0253	ear 5	ear 5	1.79	17	20	3
32	WAT-117	WATDE0253	ear 6	ear 6	1.7	17	20	3
33	WAT-117	WATDE0253	ear 7	ear 7	1.59	16	19	3
34	WAT-149	WATDE0020	ear 1	ear 1	2.14	23	27	4
35	WAT-149	WATDE0020	ear 2	ear 2	1.99	22	25	3
36	WAT-149	WATDE0020	ear 3	ear 3	1.71	22	26	4
37	WAT-149	WATDE0020	ear 4	ear 4	1.67	16	22	6
38	WAT-149	WATDE0020	ear 5	ear 5	2.45	20	24	4
39	WAT-149	WATDE0020	ear 6	ear 6	1.01	16	22	6
40	WAT-149	WATDE0020	ear 7	ear 7	1.24	14	21	7
41	WAT-156	WATDE0296	ear 1	ear 2	3	19	21	2
42	WAT-156	WATDE0296	ear 2	ear 3	2.01	15	19	4
43	WAT-156	WATDE0296	ear 3	ear 4	2.5	17	21	4
44	WAT-156	WATDE0296	ear 4	ear 5	2.34	17	20	3
45	WAT-156	WATDE0296	ear 5	ear 6	2.77	20	21	1
46	WAT-156	WATDE0296	ear 6	ear 7	3.33	19	21	2
47	WAT-156	WATDE0296	ear 7	ear 8	2.59	18	20	2
48	WAT-156	WATDE0296	ear 8	ear 9	2.3	17	21	4
49	WAT-176	WATDE0323	ear 1	ear 1	3	22	24	2
51	WAT-176	WATDE0323	ear 2	ear 3	2.36	21	22	1
52	WAT-176	WATDE0323	ear 3	ear 4	2.96	20	21	1
53	WAT-176	WATDE0323	ear 4	ear 5	3.63	23	23	0
54	WAT-176	WATDE0323	ear 5	ear 6	3.24	23	24	1
55	WAT-176	WATDE0323	ear 6	ear 7	2.76	22	22	0
56	WAT-176	WATDE0323	ear 7	ear 8	2.3	19	20	1
57	WAT-176	WATDE0323	ear 8	ear 9	2.46	23	24	1
58	WAT-196	WATDE0347	ear 1	ear 1	2.24	25	29	4
59	WAT-196	WATDE0347	ear 2	ear 2	3.15	26	30	4
60	WAT-196	WATDE0347	ear 3	ear 3	3.13	25	29	4
61	WAT-196	WATDE0347	ear 4	ear 4	2.66	24	29	5
62	WAT-196	WATDE0347	ear 5	ear 5	2.66	25	29	4
63	WAT-196	WATDE0347	ear 6	ear 6	1.68	17	23	6
64	WAT-196	WATDE0347	ear 7	ear 7	2.27	22	27	5
65	WAT-196	WATDE0347	ear 8	ear 8	1.75	17	21	4
66	WAT-196	WATDE0347	ear 9	ear 9	1.78	18	24	6
67	WAT-202	WATDE0354	ear 1	ear 1	1.22	18	23	5
68	WAT-202	WATDE0354	ear 2	ear 2	0.63	11	19	8
69	WAT-202	WATDE0354	ear 3	ear 3	1.63	20	25	5
70	WAT-202	WATDE0354	ear 4	ear 4	1.15	19	23	4
71	WAT-202	WATDE0354	ear 5	ear 5	1.55	21	25	4
72	WAT-202	WATDE0354	ear 6	ear 6	1.27	17	21	4
73	WAT-202	WATDE0354	ear 7	ear 7	1.11	17	23	6
74	WAT-325	WATDE0045	ear 1	ear 1	2.3	20	24	4
75	WAT-325	WATDE0045	ear 2	ear 2	1.3	19	23	4
76	WAT-325	WATDE0045	ear 3	ear 3	1.31	18	24	6
77	WAT-325	WATDE0045	ear 4	ear 4	2.18	19	23	4
78	WAT-325	WATDE0045	ear 5	ear 5	2.4	22	25	3
79	WAT-325	WATDE0045	ear 6	ear 6	1.43	17	23	6
80	WAT-325	WATDE0045	ear 7	ear 7	2.18	20	24	4
81	WAT-325	WATDE0045	ear 8	ear 8	1.25	17	23	6
82	WAT-548	WATDE0748	ear 1	ear 1	1.81	13	16	3
83	WAT-548	WATDE0748	ear 2	ear 2	1.92	13	16	3
84	WAT-548	WATDE0748	ear 3	ear 3	2.18	15	18	3
85	WAT-548	WATDE0748	ear 4	ear 4	1.85	13	17	4
86	WAT-548	WATDE0748	ear 5	ear 5	1.95	14	17	3
87	WAT-720	WATDE0930	ear 1	ear 1	1.36	22	26	4
88	WAT-720	WATDE0930	ear 2	ear 2	1.05	20	25	5
89	WAT-720	WATDE0930	ear 3	ear 3	1.16	20	26	6
90	WAT-720	WATDE0930	ear 4	ear 4	1.12	19	24	5
91	WAT-720	WATDE0930	ear 5	ear 5	0.86	18	25	7
92	WAT-720	WATDE0930	ear 6	ear 6	1.34	20	25	5
93	WAT-720	WATDE0930	ear 7	ear 7	1.4	21	24	3

## Sheet: S14 Branching&endpoints
order	Variety ID	GRU code	spike ID	original_ears_ID	Num_branch	Num-endpoints
1	paragon	paragon	ear 1	ear 1	391	137
2	paragon	paragon	ear 2	ear 2	402	119
3	paragon	paragon	ear 3	ear 3	431	140
4	paragon	paragon	ear 4	ear 4	397	145
5	paragon	paragon	ear 5	ear 5	458	179
6	paragon	paragon	ear 6	ear 6	432	171
7	paragon	paragon	ear 7	ear 7	516	197
8	paragon	paragon	ear 8	ear 8	371	136
9	WAT-93	WATDE0227	ear 1	ear 1	397	108
10	WAT-93	WATDE0227	ear 2	ear 2	377	126
11	WAT-93	WATDE0227	ear 3	ear 3	344	106
12	WAT-93	WATDE0227	ear 4	ear 4	411	109
13	WAT-93	WATDE0227	ear 5	ear 5	503	126
14	WAT-93	WATDE0227	ear 6	ear 6	512	101
15	WAT-93	WATDE0227	ear 7	ear 7	364	110
16	WAT-93	WATDE0227	ear 8	ear 8	385	110
17	WAT-93	WATDE0227	ear 9	ear 9	393	129
18	WAT-94	WATDE0228	ear 1	ear 1	338	119
19	WAT-94	WATDE0228	ear 2	ear 2	377	94
20	WAT-94	WATDE0228	ear 3	ear 3	325	68
21	WAT-94	WATDE0228	ear 4	ear 4	353	90
22	WAT-94	WATDE0228	ear 5	ear 5	253	85
23	WAT-94	WATDE0228	ear 6	ear 6	382	63
24	WAT-94	WATDE0228	ear 7	ear 7	291	93
25	WAT-94	WATDE0228	ear 8	ear 8	355	96
26	WAT-94	WATDE0228	ear 9	ear 9	395	96
27	WAT-117	WATDE0253	ear 1	ear 1	442	150
28	WAT-117	WATDE0253	ear 2	ear 2	402	133
29	WAT-117	WATDE0253	ear 3	ear 3	375	120
30	WAT-117	WATDE0253	ear 4	ear 4	450	143
31	WAT-117	WATDE0253	ear 5	ear 5	326	120
32	WAT-117	WATDE0253	ear 6	ear 6	510	141
33	WAT-117	WATDE0253	ear 7	ear 7	306	126
34	WAT-149	WATDE0020	ear 1	ear 1	487	157
35	WAT-149	WATDE0020	ear 2	ear 2	600	175
36	WAT-149	WATDE0020	ear 3	ear 3	376	134
37	WAT-149	WATDE0020	ear 4	ear 4	583	231
38	WAT-149	WATDE0020	ear 5	ear 5	724	254
39	WAT-149	WATDE0020	ear 6	ear 6	580	162
40	WAT-149	WATDE0020	ear 7	ear 7	590	196
41	WAT-156	WATDE0296	ear 1	ear 2	505	179
42	WAT-156	WATDE0296	ear 2	ear 3	486	146
43	WAT-156	WATDE0296	ear 3	ear 4	554	219
44	WAT-156	WATDE0296	ear 4	ear 5	453	171
45	WAT-156	WATDE0296	ear 5	ear 6	508	184
46	WAT-156	WATDE0296	ear 6	ear 7	490	141
47	WAT-156	WATDE0296	ear 7	ear 8	555	211
48	WAT-156	WATDE0296	ear 8	ear 9	519	195
49	WAT-176	WATDE0323	ear 1	ear 1	1213	424
51	WAT-176	WATDE0323	ear 2	ear 3	1233	444
52	WAT-176	WATDE0323	ear 3	ear 4	1716	613
53	WAT-176	WATDE0323	ear 4	ear 5	1430	620
54	WAT-176	WATDE0323	ear 5	ear 6	1536	581
55	WAT-176	WATDE0323	ear 6	ear 7	1751	649
56	WAT-176	WATDE0323	ear 7	ear 8	1674	609
57	WAT-176	WATDE0323	ear 8	ear 9	1861	565
58	WAT-196	WATDE0347	ear 1	ear 1	800	296
59	WAT-196	WATDE0347	ear 2	ear 2	780	302
60	WAT-196	WATDE0347	ear 3	ear 3	812	311
61	WAT-196	WATDE0347	ear 4	ear 4	848	292
62	WAT-196	WATDE0347	ear 5	ear 5	804	286
63	WAT-196	WATDE0347	ear 6	ear 6	1190	404
64	WAT-196	WATDE0347	ear 7	ear 7	643	273
65	WAT-196	WATDE0347	ear 8	ear 8	976	348
66	WAT-196	WATDE0347	ear 9	ear 9	1076	330
67	WAT-202	WATDE0354	ear 1	ear 1	386	90
68	WAT-202	WATDE0354	ear 2	ear 2	165	64
69	WAT-202	WATDE0354	ear 3	ear 3	345	81
70	WAT-202	WATDE0354	ear 4	ear 4	289	107
71	WAT-202	WATDE0354	ear 5	ear 5	316	84
72	WAT-202	WATDE0354	ear 6	ear 6	268	90
73	WAT-202	WATDE0354	ear 7	ear 7	223	66
74	WAT-325	WATDE0045	ear 1	ear 1	410	122
75	WAT-325	WATDE0045	ear 2	ear 2	413	89
76	WAT-325	WATDE0045	ear 3	ear 3	385	96
77	WAT-325	WATDE0045	ear 4	ear 4	301	56
78	WAT-325	WATDE0045	ear 5	ear 5	557	144
79	WAT-325	WATDE0045	ear 6	ear 6	332	108
80	WAT-325	WATDE0045	ear 7	ear 7	216	56
81	WAT-325	WATDE0045	ear 8	ear 8	424	101
82	WAT-548	WATDE0748	ear 1	ear 1	591	174
83	WAT-548	WATDE0748	ear 2	ear 2	506	164
84	WAT-548	WATDE0748	ear 3	ear 3	741	197
85	WAT-548	WATDE0748	ear 4	ear 4	238	65
86	WAT-548	WATDE0748	ear 5	ear 5	332	68
87	WAT-720	WATDE0930	ear 1	ear 1	366	97
88	WAT-720	WATDE0930	ear 2	ear 2	313	104
89	WAT-720	WATDE0930	ear 3	ear 3	315	72
90	WAT-720	WATDE0930	ear 4	ear 4	315	104
91	WAT-720	WATDE0930	ear 5	ear 5	244	80
92	WAT-720	WATDE0930	ear 6	ear 6	358	107
93	WAT-720	WATDE0930	ear 7	ear 7	280	93
