# Supplementary material for: Quantifying wheat spike morphology by high resolution 3D surface scanning
Source: Research Square preprint supplement (doi:10.21203/rs.3.rs-8551193/v1), 2026-02-19
Supplement: Supplementary file 3 [file cd0692391309ec2b90756eab.xlsx]

## Sheet: paragon
spike_1							spike_2							spike_3							spike_4							spike_5							spike_6							spike_7							spike_8
Z-axis_1	Thickness-profile_1	skewed gaussian_1	gaussian_1	lognorm_1	gamma_1	chi2_1	Z-axis_2	Thickness-profile_2	skewed gaussian_2	gaussian_2	lognorm_2	gamma_2	chi2_2	Z-axis_3	Thickness-profile_3	skewed gaussian_3	gaussian_3	lognorm_3	gamma_3	chi2_3	Z-axis_4	Thickness-profile_4	skewed gaussian_4	gaussian_4	lognorm_4	gamma_4	chi2_4	Z-axis_5	Thickness-profile_5	skewed gaussian_5	gaussian_5	lognorm_5	gamma_5	chi2_5	Z-axis_6	Thickness-profile_6	skewed gaussian_6	gaussian_6	lognorm_6	gamma_6	chi2_6	Z-axis_7	Thickness-profile_7	skewed gaussian_7	gaussian_7	lognorm_7	gamma_7	chi2_7	Z-axis_8
0	2.3508	6.72802e-05	8.76069	0	0	0	0	3.76924	0.862194	15.0991	0.000415981	0	0	0	4.05427	1.03551e-09	19.0199	0	0	0	0	4.61061	0.0820745	26.7376	0	0	0	0	3.47971	2.37257	19.8246	0.0339091	0	0	0	6.14488	0.707629	28.2447	0	0	0	0	11.563	11.1271	48.9726	11.6204	0	0	0
0.892506	2.38964	0.000189275	9.52457	0	0	0	1.14648	3.88238	1.20701	16.236	0.00872401	0	0	1.09841	4.91132	1.47507e-08	20.4161	0	0	0	1.0004	4.66566	0.179398	28.139	0	0	0	0.953182	4.67264	3.13365	21.1256	0.174174	0	0	0.828136	10.9437	1.21691	29.554	0	0	0	0.960716	19.4084	14.9562	50.5159	17.1718	0	0	1.13836
1.78501	2.16901	0.000509968	10.3379	0	0	0	2.29296	3.6378	1.66527	17.4314	0.059361	0	0	2.19682	5.1273	1.79819e-07	21.8811	0	0	0	2.0008	4.56835	0.372151	29.5799	0	0	0	1.90636	4.84835	4.08622	22.4814	0.549457	0	0	1.65627	3.58814	2.01442	30.8909	0	0	0	1.92143	11.2027	19.5741	52.0653	23.2397	10.0963	0	2.27673
2.67751	2.06615	0.00131613	11.202	0	0	0	3.43944	3.22872	2.26452	18.6858	0.227093	0	0	3.29523	4.0576	1.87671e-06	23.4153	0	0	0	3.0012	5.05825	0.733036	31.0591	0	0	0	2.85954	2.12434	5.26119	23.8916	1.29496	0	0	2.48441	5.54089	3.21139	32.2537	0.00964347	0	0	2.88214	11.2402	24.9619	53.6184	29.5613	24.8847	0	3.4151
3.57001	2.26383	0.00325405	12.1183	0	0	0	4.58591	3.66174	3.03552	19.9994	0.61673	0	0	4.39364	5.16429	1.67775e-05	25.0186	0	0	0	4.0016	5.23771	1.37176	32.5749	5.09844e-06	0	0	3.81273	2.12375	6.68947	25.3558	2.52117	0	0	3.31255	7.98206	4.93328	33.6406	0.744705	0	0	3.84286	43.1057	31.043	55.1727	35.9266	35.3947	0	4.55346
4.46251	2.3693	0.00770888	13.0878	0	0	0	5.7324	2.58958	4.01156	21.3721	1.33906	0	0	5.49205	5.96683	0.000128551	26.6908	0	0	0	5.002	3.68357	2.44043	34.1257	0.282035	0	0	4.76591	3.2027	8.40048	26.873	4.29599	0	0	4.14068	11.386	7.30729	35.0496	3.50066	0	0	4.80357	62.3316	37.6825	56.7257	42.1767	43.8845	0	5.69183
5.35501	2.55661	0.0175017	14.1113	0	0	0	6.87887	1.98407	5.22725	22.8036	2.48814	0	0	6.59046	5.19291	0.000844809	28.4311	0	0	0	6.0024	4.10093	4.13064	35.7093	2.32714	0	0	5.71909	4.01808	10.4204	28.4423	6.6414	0	0	4.96882	5.83191	10.4444	36.4786	8.2082	0	0	5.76429	70.9606	44.6946	58.2748	48.1957	51.0341	0	6.83019
6.24752	2.39739	0.0380872	15.1897	0	0	0	8.02535	2.93212	6.71707	24.2931	4.12717	0	0	7.68887	4.23992	0.00476602	30.2384	0.00155982	0	0	7.0028	5.83688	6.65768	37.3238	6.63311	0	0	6.67227	4.82065	12.7704	30.0623	9.53896	0	0	5.79695	5.3172	14.4173	37.9251	14.2178	0	0	6.72501	54.645	51.857	59.8173	53.9036	57.1785	0	7.96856
7.14002	2.12496	0.0794679	16.3234	0	0	0	9.17183	3.40755	8.51338	25.8398	6.28363	0	0	8.78728	6.36758	0.0231066	32.1114	0.208972	0	0	8.0032	8.24718	10.2292	38.9666	12.6468	0	0	7.62545	7.37923	15.4647	31.7313	12.9393	1.17231	0	6.62509	12.1642	19.2393	39.3869	20.8952	13.1325	0	7.68572	25.1065	58.9317	61.3505	59.2481	62.5193	22.4666	9.10692
8.03252	2.64218	0.159013	17.5126	0	0	0	10.3183	4.27552	10.6443	27.4423	8.95112	1.56773	1.56744	9.88568	8.35095	0.0963993	34.0481	1.44738	0	0	9.0036	22.4487	15.0006	40.6352	19.6588	16.7411	0	8.57864	9.38275	18.5085	33.4474	16.772	8.31349	0	7.45322	29.8639	24.8479	40.8612	27.7617	27.6865	0	8.64643	22.4421	65.6879	62.8716	64.1984	67.192	54.1232	10.2453
8.92502	3.46857	0.305233	18.7572	0	0	0	11.4648	6.49565	13.1313	29.0989	12.0949	6.16601	6.16572	10.9841	8.13213	0.346656	36.0463	4.35653	0	0	10.004	31.794	21.026	42.3267	27.0892	28.5423	0	9.53182	10.6022	21.8971	35.2083	20.955	15.5319	0	8.28136	42.0489	31.0995	42.3454	34.4927	37.2551	0	9.60715	54.9263	71.9236	64.3778	68.7398	71.2949	66.125	11.3837
9.81752	3.90906	0.562257	20.0571	0	0	0	12.6113	7.55773	15.987	30.8076	15.6595	11.4969	11.4967	12.0825	8.44887	1.07678	38.1032	8.98736	0	0	11.0044	34.2782	28.2181	44.0383	34.5258	37.6961	26.3798	10.485	9.33043	25.6145	37.0115	25.4017	22.497	10.2534	9.1095	48.0851	37.7761	43.8364	40.8826	44.6267	0	10.5679	85.702	77.4833	65.8662	72.8698	74.903	73.8789	12.522
10.71	4.35178	0.994293	21.4114	0.00168471	0	0	13.7577	7.63671	19.2129	32.566	19.5754	17.0932	17.0931	13.1809	8.94376	2.89692	40.2158	15.0353	0	0	12.0048	33.3541	36.3317	45.7667	41.6972	45.2742	39.6773	11.4382	8.15264	29.6326	38.8541	30.0262	29.1157	22.4833	9.93763	48.2205	44.6076	45.3315	46.8116	50.6091	0	11.5286	104.082	82.2676	67.334	76.5942	78.0757	79.4795	13.6604
11.6025	4.86129	1.68874	22.8192	0.153284	0	0	14.9042	15.4478	22.7979	34.3714	23.7658	22.7361	22.736	14.2793	8.83649	6.77414	42.3805	22.0762	0	0	13.0052	37.2344	44.9819	47.5085	48.4365	51.7198	49.0723	12.3914	18.2204	33.9119	40.7329	34.7478	35.3517	32.1277	10.7658	47.0739	51.3032	46.8274	52.2184	55.5877	0	12.4893	116.22	86.2363	68.7783	79.9252	80.8614	83.7272	14.7987
12.495	4.9556	2.75613	24.2793	1.01866	0	0	16.0507	27.353	26.717	36.2205	28.1521	28.2981	28.298	15.3777	9.88103	13.8315	44.5932	29.6942	9.38824	9.38807	14.0056	43.0858	53.6959	49.2602	54.6501	57.2794	56.3907	13.3445	37.456	38.4022	42.6445	39.4925	41.1918	40.2576	11.5939	45.0666	57.5867	48.3208	57.0806	59.7882	42.2273	13.45	114.666	89.4028	70.1962	82.8793	83.3005	87.0284	15.9371
13.3875	4.8681	4.32495	25.7899	3.05809	0	0	17.1972	35.5031	30.9314	38.1098	32.6574	33.6981	33.698	16.4761	24.6502	24.8079	46.8495	37.5359	32.6351	32.6351	15.006	49.8021	61.9882	51.018	60.2943	62.112	62.3282	14.2977	60.2153	43.0438	44.5851	44.1952	46.6351	47.2791	12.422	41.6743	63.2305	49.8086	61.4012	63.3588	58.7833	14.4107	97.3847	91.824	71.5848	85.4752	85.4272	89.6233	17.0755
14.28	6.61942	6.52982	27.3491	6.34228	0	0	18.3437	43.3255	35.3891	40.0354	37.2097	38.8829	38.8829	17.5746	35.2328	39.3945	49.1446	45.3242	46.6182	46.6183	16.0064	66.0099	69.4386	52.7782	65.3584	66.33	67.2483	15.2509	75.9265	47.7701	46.5505	48.7996	51.687	53.415	13.2502	61.0075	68.0779	51.2872	65.199	66.4046	66.4766	15.3714	85.7189	93.5863	72.9413	87.7338	87.2712	91.6677	18.2138
15.1725	9.67095	9.49289	28.9545	10.6827	0	4.87091	19.4901	61.5356	40.0265	41.9931	41.7434	43.8174	43.8174	18.673	56.5376	55.9544	51.4731	52.8538	57.2087	57.2088	17.0068	83.4965	75.7541	54.5367	69.853	70.0174	71.3733	16.2041	83.7282	52.5102	48.5364	53.2587	56.3574	58.8104	14.0783	77.6185	72.0533	52.7532	68.5022	69.0041	71.3457	16.3321	72.9385	94.7916	74.2627	89.6763	88.8581	93.27	19.3522
16.065	16.5844	13.3004	30.6033	15.789	0	13.9461	20.6366	62.2778	44.7707	43.978	46.2009	48.4788	48.4789	19.7714	77.7283	72.0104	53.8293	59.9814	65.7155	65.7156	18.0072	93.1714	80.7974	56.2893	73.8022	73.2402	74.8527	17.1573	91.456	57.1918	50.5382	57.534	60.6583	63.5688	14.9064	89.3978	75.159	54.203	71.344	71.2183	74.7217	17.2929	78.8778	95.5449	75.5464	91.3242	90.2107	94.509	20.4906
16.9575	20.947	17.9784	32.2923	21.3634	0	21.8577	21.7831	58.8003	49.5429	45.9853	50.5326	52.8533	52.8533	20.8698	89.6925	85.2956	56.2071	66.6131	72.7316	72.7317	19.0076	97.8535	84.5812	58.0317	77.2373	76.0518	77.7941	18.1105	93.3184	61.7442	52.5509	61.5952	64.6034	67.7693	15.7346	96.0761	77.4595	55.6331	73.7601	73.096	77.1517	18.2536	92.15	95.9448	76.7895	92.6988	91.3489	95.4444	21.6289
17.85	21.0993	23.4735	34.018	27.1449	18.4355	28.8971	22.9296	55.7981	54.2622	48.0096	54.6969	56.9334	56.9335	21.9682	97.0464	94.659	58.5999	72.6935	78.597	78.5971	20.008	100.087	87.2339	59.7597	80.1943	78.4965	80.2783	19.0636	79.2988	66.1015	54.5695	65.4191	68.2074	71.4751	16.5627	95.3593	79.0613	57.0399	75.7862	74.6773	78.9216	19.2143	101.941	96.0772	77.9893	93.8208	92.291	96.1224	22.7673
18.7425	27.8395	29.6446	35.7764	32.923	29.7677	35.1974	24.0761	58.4631	58.8489	50.0452	58.6602	60.7167	60.7168	23.0666	101.185	100.251	61.001	78.1961	83.5333	83.5334	21.0084	94.9336	88.9522	61.4687	82.7101	80.6117	82.3688	20.0168	71.1475	70.2051	56.5885	68.989	71.4851	74.7378	17.3909	92.503	80.0907	58.4196	77.4574	75.9958	80.2024	20.175	107.503	96.0123	79.1431	94.71	93.0529	96.5803	23.9057
19.635	35.4384	36.2691	37.5634	38.5388	38.3256	40.8459	25.2225	54.4313	63.2288	52.0861	62.396	64.2045	64.2046	24.165	93.5648	103.036	63.4031	83.1155	87.6969	87.697	22.0088	78.3174	89.9531	63.1544	84.822	82.4294	84.1163	20.97	61.5206	74.0057	58.6023	72.2941	74.4518	77.6014	18.219	79.4091	80.6745	59.7687	78.8072	77.0797	81.1057	21.1357	106.91	95.8049	80.2484	95.3855	93.6494	96.848	25.044
20.5275	38.9278	43.0657	39.3742	43.8779	45.233	45.9088	26.369	56.064	67.3361	54.126	65.8845	67.4007	67.4008	25.2634	82.134	104.124	65.7988	87.4615	91.2048	91.2048	23.0092	80.4017	90.4385	64.812	86.566	83.9778	85.5623	21.9232	61.5619	77.4649	60.6052	75.3279	77.1226	80.1033	19.0471	66.3905	80.9271	61.0834	79.8671	77.9536	81.7091	22.0964	102.264	95.4954	81.3028	95.865	94.0938	96.9503	26.1824
21.4201	40.0267	49.7282	41.2039	48.8637	50.9631	50.4399	27.5155	64.2449	71.1163	56.1586	69.112	70.3114	70.3115	26.3618	89.3252	104.354	68.1804	91.2543	94.1478	94.1479	24.0096	80.3117	90.5741	66.437	87.9762	85.2813	86.7417	22.8764	63.6994	80.5563	62.5914	78.0886	79.5125	82.2763	19.8753	58.7009	80.9431	62.3604	80.6663	78.6385	82.069	23.0572	85.9015	95.1123	82.3037	96.1657	94.3982	96.9082	27.3208
22.3126	57.8216	55.9658	43.047	53.4487	55.7808	54.4851	28.662	70.2387	74.5278	58.177	72.0696	72.9445	72.9446	27.4602	93.6497	104.208	70.5399	94.5212	96.599	96.599	25.01	91.9124	90.4832	68.025	89.0849	86.3617	87.6839	23.8295	74.2188	83.2651	64.5546	80.5774	81.6361	84.1493	20.7034	67.8154	80.795	63.5958	81.232	79.1532	82.228	24.0179	76.0931	94.675	83.2488	96.3031	94.5736	96.7391	28.4591
23.2051	69.7343	61.5393	44.8981	57.6081	59.8577	58.0844	29.8084	73.4783	77.543	60.1743	74.7533	75.3087	75.3088	28.5587	95.9545	103.907	72.8692	97.2935	98.6182	98.6182	26.0104	99.5567	90.2496	69.5712	89.9221	87.2384	88.4143	24.7827	73.8032	85.5877	66.4888	82.7986	83.5079	85.7479	21.5315	77.1513	80.5348	64.7864	81.5889	79.5139	82.2191	24.9786	70.0443	94.196	84.1361	96.2922	94.6303	96.4581	29.5975
24.0976	74.6735	66.2867	46.751	61.3337	63.315	61.2737	30.9549	80.352	80.1481	62.1437	77.1627	77.414	77.4141	29.6571	98.841	103.534	75.16	99.6049	100.256	100.256	27.0108	95.7384	89.9263	71.0712	90.5154	87.929	88.9547	25.7359	67.274	87.5309	68.3877	84.7584	85.1416	87.0952	22.3597	85.1402	80.198	65.9286	81.7597	79.7352	82.0686	25.9393	75.5131	93.6833	84.9634	96.1467	94.5777	96.0783	30.7359
24.9901	73.1742	70.134	48.5997	64.6298	66.2436	64.085	32.1014	86.2281	82.3425	64.0778	79.3006	79.2706	79.2707	30.7555	96.9481	103.115	77.4041	101.49	101.554	101.554	28.0112	93.261	89.5441	72.5204	90.8901	88.4492	89.3243	26.6891	63.034	89.11	70.2453	86.4652	86.5507	88.2119	23.1878	91.6227	79.8071	67.0192	81.7649	79.8303	81.7975	26.9	87.8326	93.1419	85.7287	95.8794	94.4242	95.611	31.8742
25.8826	74.9346	73.0895	50.4377	67.5094	68.7146	66.5476	33.2479	85.9003	84.137	65.9696	81.1724	80.8895	80.8896	31.8539	101.406	102.656	79.5929	102.984	102.55	102.55	29.0116	84.39	89.1201	73.9147	91.0695	88.8132	89.54	27.6423	71.8748	90.347	72.055	87.9284	87.7483	89.1168	24.0159	93.5687	79.3762	68.0549	81.6232	79.8108	81.4233	27.8607	97.0247	92.5747	86.4303	95.502	94.178	95.066	33.0126
26.7751	77.1459	75.2275	52.2583	69.991	70.7854	68.6884	34.3944	79.9008	85.5518	67.8118	82.7858	82.2816	82.2816	32.9523	103.485	102.161	81.7182	104.119	103.275	103.275	30.012	75.1419	88.663	75.2495	91.0746	89.0342	89.6168	28.5955	82.2515	91.2691	73.8108	89.1588	88.7469	89.827	24.8441	91.9784	78.9132	69.0327	81.3515	79.6872	80.9605	28.8214	96.2203	91.9836	87.0664	95.0256	93.8465	94.4521	34.151
27.6676	77.8938	76.6639	54.0549	72.0971	72.5034	70.5319	35.5408	86.7455	86.6144	69.5972	84.1499	83.4581	83.4582	34.0507	92.2315	101.628	83.7717	104.928	103.758	103.758	31.0124	68.7474	88.1773	76.5209	90.9247	89.124	89.568	29.5486	87.9525	91.9065	75.5066	90.1677	89.5585	90.3584	25.6722	88.3053	78.4229	69.9496	80.9652	79.4691	80.4212	29.7822	91.7768	91.3699	87.6356	94.4602	93.4363	93.777	35.2893
28.5601	70.5966	77.5327	55.8206	73.8523	73.9086	72.1008	36.6873	90.1209	87.3571	71.3187	85.2752	84.4302	84.4302	35.1491	90.9787	101.06	85.7452	105.442	104.023	104.023	32.0128	70.7938	87.6653	77.7247	90.6373	89.0935	89.4056	30.5018	90.1686	92.2906	77.1362	90.9668	90.1947	90.7251	26.5004	77.7815	77.9078	70.8028	80.4779	79.1652	79.8158	30.7429	95.994	90.7344	88.1365	93.815	92.954	93.0475	36.4277
29.4526	64.7608	77.9655	57.5482	75.2822	75.0351	73.4162	37.8338	90.7164	87.8148	72.9694	86.1733	85.2089	85.209	36.2475	88.6578	100.457	87.6306	105.69	104.092	104.092	33.0132	78.6516	87.128	78.8572	90.228	88.9527	89.1404	31.455	94.8636	92.4529	78.6937	91.5682	90.6664	90.9406	27.3285	68.4346	77.3696	71.5898	79.9021	78.7834	79.1532	31.7036	92.3847	90.0778	88.5679	93.0988	92.4054	92.2699	37.5661
30.3451	69.5078	78.0785	59.231	76.4127	75.9126	74.4975	38.9803	87.8263	88.0228	74.5423	86.8561	85.8053	85.8053	37.3459	91.6503	99.8192	89.4202	105.698	103.985	103.985	34.0136	86.7602	86.5664	79.9146	89.7113	88.7109	88.7821	32.4082	96.7971	92.4236	80.1734	91.984	90.9843	91.0169	28.1566	64.9657	76.8093	72.308	79.249	78.3308	78.4411	32.6643	86.8328	89.4007	88.9286	92.3192	91.7961	91.4494	38.7044
31.2376	73.2586	77.9651	60.8618	77.2689	76.5668	75.3629	40.1268	87.4415	88.0158	76.031	87.3362	86.2299	86.2299	38.4443	90.9622	99.1477	91.1065	105.491	103.719	103.719	35.014	90.5471	85.981	80.8937	89.0998	88.3764	88.3394	33.3614	93.594	92.2307	81.5698	92.2263	91.1585	90.9653	28.9848	60.7616	76.2275	72.9553	78.5286	77.8142	77.6861	33.625	78.6225	88.7038	89.218	91.4836	91.131	90.5912	39.8428
32.1301	76.3418	77.6957	62.4339	77.8754	77.0206	76.029	41.2732	85.6013	87.8259	77.429	87.6262	86.4933	86.4933	39.5428	95.027	98.443	92.6824	105.093	103.31	103.31	36.0144	91.9455	85.3723	81.791	88.4054	87.9573	87.8204	34.3145	93.1096	91.8995	82.8776	92.307	91.1985	90.7963	29.8129	65.7613	75.625	73.5297	77.75	77.2396	76.894	34.5857	80.1591	87.9874	89.4351	90.5986	90.415	89.6996	40.9812
33.0226	75.6649	77.3192	63.9403	78.2555	77.294	76.5117	42.4197	77.2104	87.4823	78.7302	87.7388	86.6056	86.6056	40.6412	104.185	97.7061	94.141	104.525	102.772	102.772	37.0148	93.6899	84.7411	82.6038	87.6384	87.4606	87.2324	35.2677	95.4847	91.4523	84.0919	92.2378	91.1137	90.5194	30.641	70.5496	75.0024	74.0292	76.9212	76.6124	76.0701	35.5464	87.2362	87.2523	89.5796	89.6702	89.6526	88.7787	42.1195
33.9151	70.979	76.8683	65.3744	78.4312	77.4052	76.8254	43.5662	79.9032	87.0106	79.9291	87.6866	86.5767	86.5767	41.7396	104.878	96.9377	95.476	103.807	102.119	102.119	38.0152	89.7193	84.0877	83.3292	86.8084	86.8933	86.5821	36.2209	100.729	90.9081	85.2077	92.0298	90.9126	90.1437	31.4692	72.8122	74.3602	74.4524	76.0496	75.9379	75.2187	36.5072	89.2799	86.499	89.651	88.704	88.8479	87.832	43.2579
34.8076	75.3396	76.3631	66.7298	78.4233	77.3702	76.9838	44.7127	82.7874	86.4327	81.0203	87.4819	86.4161	86.4161	42.838	100.013	96.1386	96.6815	102.955	101.362	101.362	39.0156	75.7425	83.4129	83.9648	85.9238	86.2614	85.8756	37.1741	101.785	90.2832	86.221	91.6941	90.6037	89.6774	32.2973	69.8156	73.699	74.7979	75.1416	75.2207	74.344	37.4679	90.3087	85.728	89.6493	87.705	88.0048	86.8629	44.3962
35.7001	78.4416	75.8158	68.0004	78.2508	77.2035	76.9995	45.8591	84.5751	85.7672	81.9988	87.1366	86.1331	86.1331	43.9364	90.8762	95.3098	97.7522	101.987	100.511	100.511	40.016	63.9258	82.7171	84.5085	84.9923	85.5708	85.1183	38.1273	94.6949	89.5908	87.1275	91.241	90.1948	89.1282	33.1254	68.1487	73.0195	75.0646	74.2032	74.4652	73.4494	38.4286	84.5452	84.94	89.5743	86.6781	87.1269	85.8745	45.5346
36.5926	79.6448	75.2336	69.1802	77.9316	76.9184	76.8845	47.0056	82.3366	85.0291	82.8603	86.6625	85.7364	85.7364	45.0348	94.465	94.452	98.6832	100.918	99.5779	99.5779	41.0164	67.3725	82.0011	84.9585	84.0207	84.8268	84.3156	39.0805	93.0513	88.8418	87.9238	90.6806	89.6935	88.5035	33.9536	70.1201	72.3223	75.2516	73.2395	73.6754	72.5382	39.3893	86.5264	84.1356	89.4262	85.6272	86.2175	84.8693	46.673
37.4851	76.5415	74.6204	70.2638	77.4821	76.5266	76.6496	48.1521	82.2411	84.2305	83.6009	86.0706	85.2346	85.2346	46.1332	95.3477	93.5663	99.4705	99.7602	98.5699	98.5698	42.0168	75.3771	81.2655	85.3132	83.0153	84.0344	83.472	40.0336	90.2297	88.0448	88.6066	90.0223	89.1069	87.8098	34.7817	69.7472	71.6079	75.3584	72.2553	72.855	71.6131	40.35	88.3136	83.3153	89.2055	84.5565	85.28	83.85	47.8113
38.3776	73.126	73.9786	71.246	76.9174	76.0391	76.3052	49.2986	81.6634	83.3811	84.2172	85.3716	84.6357	84.6357	47.2316	92.5924	92.6534	100.11	98.5265	97.4956	97.4956	43.0172	82.6506	80.5108	85.5714	81.9816	83.1984	82.592	40.9868	91.1625	87.2069	89.1732	89.2752	88.4416	87.0534	35.6099	68.1365	70.8771	75.3846	71.2547	72.0074	70.6768	41.3107	86.3539	82.4798	88.9127	83.4693	84.3171	82.8188	48.9497
39.2701	77.0145	73.3099	72.122	76.2513	75.4655	75.861	50.4451	77.2854	82.4885	84.7063	84.5758	83.9475	83.9475	48.33	92.7105	91.7145	100.6	97.2279	96.3626	96.3626	44.0176	83.4526	79.7378	85.7322	80.9246	82.3229	81.6795	41.94	88.0715	86.3334	89.6213	88.4478	87.7042	86.24	36.438	69.9567	70.1305	75.33	70.2416	71.1358	69.7314	42.2715	77.5645	81.6297	88.5484	82.3689	83.3317	81.7778	50.0881
40.1626	79.5471	72.6154	72.8878	75.4963	74.8149	75.3259	51.5915	71.4243	81.5585	85.0659	83.6927	83.1774	83.1774	49.4284	98.8855	90.7505	100.937	95.8744	95.1778	95.1778	45.018	82.9088	78.9471	85.795	79.8488	81.4121	80.7382	42.8932	78.4292	85.4286	89.9492	87.5482	86.9007	85.3752	37.2661	67.8881	69.3687	75.195	69.2191	70.2432	68.7791	43.2322	69.4471	80.7657	88.1137	81.2582	82.3263	80.7289	51.2264
41.0551	70.3419	71.896	73.5395	74.664	74.0954	74.7082	52.738	77.0494	80.5959	85.2945	82.7315	82.3324	82.3324	50.5269	99.4946	89.7623	101.12	94.4751	93.9474	93.9473	46.0184	84.5892	78.1394	85.7598	78.7582	80.4696	79.7715	43.8464	76.8389	84.496	90.1553	86.5839	86.0368	84.4639	38.0943	65.4013	68.5924	74.9799	68.1904	69.3321	67.8217	44.1929	73.4417	79.8883	87.6094	80.1399	81.3035	79.6738	52.3648
41.9476	66.0998	71.1528	74.074	73.7648	73.3146	74.0157	53.8845	79.6317	79.6042	85.3909	81.7008	81.4193	81.4192	51.6253	95.0039	88.751	101.148	93.038	92.6772	92.6771	47.0188	86.478	77.3154	85.6265	77.6564	79.499	78.7826	44.7995	81.1479	83.5381	90.239	85.5621	85.118	83.5108	38.9224	64.136	67.8023	74.6854	67.158	68.4052	66.8609	45.1536	77.8132	78.9981	87.0369	79.0164	80.2654	78.6142	53.5032
42.8401	65.6184	70.3866	74.4886	72.8081	72.4792	73.2559	55.031	79.8833	78.5865	85.3547	80.6086	80.4443	80.4443	52.7237	99.6543	87.7176	101.021	91.5705	91.3725	91.3725	48.0192	78.7256	76.4757	85.3956	76.5466	78.5035	77.7744	45.7527	81.3034	82.5572	90.1999	84.4893	84.1492	82.5204	39.7505	65.4782	66.9991	74.3125	66.1244	67.4647	65.8981	46.1143	78.7056	78.096	86.3975	77.8898	79.2141	77.5514	54.6415
43.7326	69.7613	69.5984	74.7813	71.8026	71.5956	72.4353	56.1775	82.6088	77.5449	85.1861	79.4624	79.4135	79.4135	53.8221	101.764	86.6631	100.739	90.0791	90.0382	90.0382	49.0196	71.9569	75.6211	85.0679	75.4317	77.4861	76.7496	46.7059	79.5085	81.5552	90.0381	83.3718	83.1355	81.4967	40.5787	65.4425	66.1835	73.8623	65.0917	66.5129	64.9347	47.075	74.2555	77.1824	85.6928	76.7623	78.1517	76.487	55.7799
44.6251	74.6262	68.789	74.9507	70.7558	70.6695	71.5604	57.3239	83.4485	76.4816	84.8858	78.2694	78.3326	78.3326	54.9205	99.5612	85.5887	100.304	88.5699	88.6789	88.6789	50.02	72.8156	74.7523	84.6446	74.3142	76.4496	75.7106	47.6591	79.298	80.5336	89.7543	82.2153	82.0813	80.4435	41.4068	62.2022	65.3561	73.3363	64.0616	65.5517	63.972	48.0357	72.6618	76.258	84.9244	75.6355	77.08	75.422	56.9183
45.5176	77.8132	67.9595	74.9958	69.6749	69.7062	70.637	58.4704	80.4144	75.3983	84.4553	77.036	77.207	77.207	56.0189	87.8955	84.4953	99.7183	87.0479	87.2986	87.2986	51.0204	76.2422	73.8699	84.127	73.1964	75.3968	74.6598	48.6123	80.7454	79.4938	89.3496	81.0252	80.9909	79.3645	42.2349	65.8187	64.5176	72.7361	63.0359	64.5829	63.011	48.9965	82.0814	75.3234	84.0942	74.511	76.0008	74.3576	58.0566
46.4101	71.9368	67.1108	74.9165	68.5661	68.7106	69.6707	59.6169	73.8613	74.2966	83.8965	75.7683	76.0418	76.0417	57.1173	89.329	83.3841	98.9838	85.518	85.9012	85.9011	52.0208	75.1841	72.9748	83.517	72.0804	74.3299	73.5992	49.5655	80.5747	78.437	88.8258	79.8066	79.8683	78.2628	43.0631	66.9402	63.6687	72.0636	62.016	63.6083	62.0528	49.9572	83.7202	74.3794	83.204	73.3904	74.9155	73.2949	59.195
47.3026	63.335	66.2438	74.7131	67.4351	67.6871	68.6665	60.7634	73.5385	73.1779	83.212	74.472	74.8417	74.8416	58.2157	92.9931	82.2561	98.1042	83.9844	84.49	84.49	53.0212	71.5031	72.0676	82.8166	70.9679	73.2514	72.5309	50.5186	74.8905	77.3644	88.1848	78.5639	78.7175	77.1416	43.8912	64.4912	62.8102	71.321	61.0031	62.6295	61.0983	50.9179	80.5194	73.4266	82.2561	72.275	73.8258	72.2348	60.3334
48.1951	63.3355	65.3596	74.3867	66.2869	66.6397	67.6292	61.9099	76.1273	72.0435	82.4049	73.1523	73.6112	73.6112	59.3141	89.515	81.1124	97.0833	82.4508	83.0684	83.0684	54.0216	73.026	71.1491	82.0282	69.8607	72.1633	71.4566	51.4718	69.924	76.2773	87.4294	77.3016	77.5419	76.0038	44.7194	63.4433	61.9427	70.5105	59.9984	61.6479	60.1482	51.8786	73.1132	72.4656	81.2525	71.1659	72.7331	71.1781	61.4717
49.0876	63.4485	64.4591	73.9389	65.1261	65.5723	66.5633	63.0563	73.9216	70.8949	81.479	71.8139	72.3547	72.3546	60.4125	83.8565	79.954	95.9258	80.9205	81.6393	81.6393	55.022	76.2081	70.2199	81.1543	68.76	71.0675	70.3781	52.425	73.8628	75.1766	86.5625	76.0234	76.3448	74.852	45.5475	64.9906	61.0669	69.6346	59.0029	60.6648	59.2034	52.8393	68.0829	71.497	80.1957	70.0641	71.6386	70.1258	62.6101
49.9801	62.1083	63.5434	73.3719	63.9566	64.4883	65.4727	64.2028	72.7892	69.7333	80.4385	70.4614	71.076	71.0759	61.5109	86.78	78.7822	94.6368	79.3965	80.2054	80.2054	56.0224	72.8017	69.2808	80.1979	67.6671	69.966	69.2968	53.3782	68.6533	74.0634	85.5875	74.7332	75.1295	73.6888	46.3756	62.201	60.1835	68.6959	58.0174	59.6816	58.2645	53.8	73.6874	70.5215	79.0879	68.9707	70.5436	69.0785	63.7485
50.8726	59.8369	62.6135	72.6885	62.7823	63.3909	64.3613	65.3493	74.6038	68.56	79.2879	69.0987	69.7789	69.7788	62.6094	86.0675	77.5978	93.2221	77.8814	78.7691	78.7691	57.0228	70.8082	68.3326	79.1622	66.5832	68.8604	68.2143	54.3314	69.8798	72.9388	84.5084	73.434	73.8989	72.5164	47.2038	60.2843	59.2933	67.6975	57.0427	58.6994	57.3321	54.7607	70.9483	69.5397	77.9318	67.8864	69.4493	68.0368	64.8868
51.7651	54.7032	61.6703	71.892	61.6062	62.283	63.2327	66.4958	74.2457	67.3762	78.0325	67.7295	68.4669	68.4668	63.7078	78.5221	76.4022	91.6877	76.3775	77.3328	77.3327	58.0232	66.0457	67.3759	78.0504	65.5092	67.7523	67.1318	55.2845	71.6737	71.8038	83.3294	72.1292	72.6558	71.337	48.0319	58.0708	58.3968	66.6421	56.0794	57.7193	56.4068	55.7215	65.5323	68.5524	76.7298	66.8121	68.3566	67.0015	66.0252
52.6576	56.7615	60.7149	70.9863	60.4313	61.1672	62.0901	67.6422	72.0704	66.1833	76.6777	66.3573	67.1432	67.1432	64.8062	82.7144	75.1962	90.0404	74.8867	75.8984	75.8984	59.0236	65.4855	66.4115	76.8663	64.4459	66.6432	66.0507	56.2377	73.2114	70.6595	82.055	70.8213	71.4028	70.1527	48.86	50.095	57.4948	65.533	55.1279	56.7422	55.4889	56.6822	62.0272	67.56	75.4847	65.7483	67.2666	65.973	67.1636
53.5501	61.036	59.7482	69.9758	59.2601	60.0461	60.9365	68.7887	65.1447	64.9823	75.2295	64.9851	65.8109	65.8109	65.9046	88.7929	73.9811	88.2872	73.4109	74.4681	74.468	60.024	65.5313	65.4401	75.6135	63.394	65.5344	64.9719	57.1909	74.8928	69.5068	80.6901	69.5131	70.1422	68.9652	49.6882	50.3465	56.588	64.3734	54.1889	55.769	54.5791	57.6429	69.6079	66.5632	74.1991	64.6956	66.1803	64.9518	68.3019
54.4426	61.6583	58.7714	68.8652	58.0948	58.9217	59.7748	69.9352	70.9168	63.7745	73.694	63.6157	64.4729	64.4728	67.003	84.3001	72.7578	86.4354	71.9516	73.0433	73.0433	61.0244	65.866	64.4623	74.2961	62.3542	64.4272	63.8966	58.1441	71.7164	68.3468	79.24	68.2067	68.8763	67.7764	50.5163	54.1627	55.6769	63.1667	53.2626	54.8007	53.6776	58.6036	76.2566	65.5627	72.8758	63.6546	65.0983	63.9385	69.4403
55.3351	60.3433	57.7854	67.6599	56.9373	57.7963	58.6075	71.0817	69.492	62.5612	72.0778	62.2516	63.1316	63.1316	68.1014	77.1864	71.5274	84.4928	70.51	71.6258	71.6258	62.0248	63.0091	63.4791	72.9181	61.3271	63.3228	62.8257	59.0973	69.1674	67.1805	77.71	66.9044	67.6072	66.5877	51.3444	55.5592	54.7624	61.9162	52.3494	53.8379	52.7848	59.5643	76.1953	64.5591	71.5177	62.6257	64.0216	62.9335	70.5787
56.2276	56.5255	56.7913	66.3654	55.7896	56.6717	57.4371	72.2282	64.3502	61.3434	70.3876	60.8952	61.7897	61.7896	69.1998	67.5354	70.291	82.4672	69.0874	70.2171	70.2171	63.0252	66.9303	62.4909	71.4839	60.313	62.2222	61.76	60.0505	72.5495	66.0089	76.1059	65.6081	66.337	65.4008	52.1726	54.5311	53.845	60.6256	51.4495	52.8813	51.9011	60.525	73.643	63.5529	70.1276	61.6092	62.9509	61.9371	71.717
57.1201	55.0207	55.7899	64.9877	54.6529	55.5495	56.2656	73.3746	61.0346	60.1225	68.6304	59.5484	60.4492	60.4492	70.2982	70.5587	69.0496	80.3669	67.6846	68.8183	68.8183	64.0256	65.8184	61.4985	69.9977	59.3124	61.1264	60.7005	61.0036	70.0376	64.8329	74.4335	64.3195	65.0674	64.2168	53.0007	56.9763	52.9255	59.2984	50.5632	51.9317	51.0266	61.4857	71.954	62.5448	68.7084	60.6055	61.8868	60.9496	72.8554
58.0126	57.0762	54.7824	63.533	53.5287	54.4314	55.0951	74.5211	63.8722	58.8994	66.8131	58.2131	59.1125	59.1124	71.3966	66.3741	67.8043	78.2	66.3025	67.4308	67.4308	65.026	63.1624	60.5027	68.464	58.3256	60.0364	59.6478	61.9568	64.9778	63.6536	72.6988	63.0401	63.8	63.0372	53.8288	59.7482	52.0044	57.9381	49.6905	50.9896	50.1617	62.4465	76.6629	61.5354	67.2629	59.6148	60.83	59.9715	73.9938
58.9051	54.6106	53.7696	62.0079	52.4182	53.3187	53.9276	75.6676	59.7534	57.6754	64.9429	56.891	57.7812	57.7812	72.495	59.2881	66.556	75.9748	64.9418	66.0556	66.0556	66.0264	65.789	59.5041	66.8874	57.3527	58.9531	58.6027	62.91	64.5472	62.4718	70.9079	61.7714	62.5365	61.8631	54.657	55.2722	51.0823	56.5485	48.8317	50.0555	49.3065	63.4072	70.7651	60.5252	65.794	58.6374	59.781	59.0029	75.1321
59.7976	52.2934	52.7527	60.4191	51.3222	52.2128	52.7646	76.8141	52.3908	56.4516	63.0271	55.5835	56.4574	56.4574	73.5935	63.5158	65.3057	73.6999	63.603	64.6937	64.6937	67.0268	63.7566	58.5033	65.2723	56.3941	57.8771	57.5657	63.8632	67.0391	61.2886	69.067	60.5147	61.2784	60.6956	55.4851	53.0423	50.16	55.1331	47.9867	49.1299	48.4613	64.3679	59.78	59.5149	64.3046	57.6735	58.7404	58.0441	76.2705
60.6901	46.2481	51.7324	58.7733	50.2416	51.1149	51.6077	77.9606	49.9939	55.2289	61.0729	54.2919	55.1425	55.1425	74.6919	65.3176	64.0545	71.3835	62.2865	63.3459	63.3459	68.0272	60.5989	57.5011	63.6234	55.4499	56.8092	56.5374	64.8164	69.8342	60.1047	67.1823	59.2709	60.0269	59.5355	56.3133	51.8472	49.238	53.6957	47.1556	48.2133	47.6262	65.3286	59.2119	58.5049	62.7977	56.7232	57.7087	57.0954	77.4089
61.5826	48.6477	50.7098	57.0775	49.1771	50.026	50.4584	79.107	53.5084	54.0086	59.0874	53.0174	53.838	53.838	75.7903	60.7802	62.8033	69.034	60.9926	62.0131	62.0131	69.0276	59.5298	56.4981	61.9452	54.5202	55.7501	55.5183	65.7695	69.9774	58.9213	65.2602	58.0413	58.7833	58.384	57.1414	51.5072	48.3169	52.2397	46.3384	47.306	46.8013	66.2893	64.522	57.4959	61.2759	55.7866	56.6863	56.157	78.5472
62.4752	54.5079	49.6858	55.3386	48.1292	48.9471	49.318	80.2535	54.7528	52.7916	57.0777	51.7608	52.5454	52.5454	76.8887	62.177	61.5531	66.6594	59.7217	60.6959	60.6959	70.028	56.4696	55.4949	60.2422	53.605	54.7004	54.5089	66.7227	69.5032	57.739	63.3068	56.8266	57.5487	57.2417	57.9695	55.3566	47.3973	50.7689	45.5351	46.4085	45.9868	67.25	64.924	56.4884	59.7422	54.8638	55.6735	55.2289	79.6856
63.3677	57.4569	48.6612	53.5638	47.0986	47.879	48.1875	81.4	54.8709	51.5789	55.0507	50.5232	51.2659	51.2658	77.9871	59.7957	60.3047	64.2679	58.4739	59.395	59.395	71.0284	60.5313	54.4923	58.5191	52.7045	53.6605	53.5096	67.6759	65.9554	56.5589	61.3283	55.6276	56.3243	56.1094	58.7977	57.4574	46.4797	49.2867	44.7456	45.5211	45.1827	68.2108	64.4455	55.483	58.1993	53.9548	54.6709	54.3114	80.8239
64.2602	55.5412	47.6371	51.7599	46.0855	46.8225	47.0682	82.5465	56.8519	50.3714	53.0133	49.3051	50.0005	50.0005	79.0855	56.9913	59.0591	61.8672	57.2493	58.111	58.111	72.0288	59.8552	53.4907	56.7803	51.8186	52.6311	52.5209	68.6291	62.5591	55.3818	59.3308	54.4449	55.1108	54.9878	59.6258	56.9382	45.5649	47.7965	43.9699	44.644	44.3891	69.1715	60.6935	54.4801	56.65	53.0597	53.6786	53.4046	81.9623
65.1527	48.3989	46.6142	49.9338	45.0902	45.7783	45.9608	83.693	56.4558	49.1703	50.9721	48.1072	48.7503	48.7503	80.1839	55.258	57.8171	59.4649	56.0478	56.8443	56.8443	73.0292	56.9808	52.4908	55.0301	50.9472	51.6125	51.543	69.5823	52.0099	54.2084	57.3202	53.2793	53.9093	53.8776	60.4539	52.8019	44.6532	46.3019	43.2079	43.7775	43.6061	70.1322	57.7089	53.4803	55.0969	52.1785	52.6971	52.5087	83.1007
66.0452	45.093	45.5935	48.0923	44.113	44.747	44.8664	84.8394	52.4272	47.9762	48.9333	46.9301	47.5163	47.5163	81.2823	57.4329	56.5797	57.0683	54.8697	55.5953	55.5953	74.0296	59.6536	51.4933	53.2729	50.0904	50.6051	50.5763	70.5355	52.5587	53.0396	55.3024	52.131	52.7204	52.7794	61.2821	50.0344	43.7452	44.8059	42.4594	42.9218	42.8337	71.0929	58.0373	52.484	53.5426	51.3111	51.7266	51.6236	84.239
66.9377	48.2219	44.5757	46.2418	43.154	43.7293	43.7856	85.9859	43.5833	46.7903	46.9032	45.7741	46.2992	46.2992	82.3807	56.8276	55.3476	54.6843	53.7146	54.3645	54.3645	75.03	57.2234	50.4986	51.5128	49.2481	49.6094	49.6209	71.4886	56.4132	51.8762	53.2831	51.0007	51.5449	51.6935	62.1102	47.9083	42.8415	43.3119	41.7243	42.0772	42.072	72.0536	52.2541	51.4918	51.9896	50.4574	50.7673	50.7496	85.3774
67.8302	48.9663	43.5617	44.3888	42.2134	42.7254	42.7192	87.1324	37.3315	45.6131	44.8875	44.6396	45.0997	45.0997	83.4791	57.5233	54.1217	52.3196	52.5826	53.152	53.152	76.0304	54.3768	49.5074	49.7539	48.4201	48.6257	48.6773	72.4418	58.2144	50.7189	51.2676	49.8886	50.3836	50.6205	62.9383	45.6172	41.9425	41.8229	41.0026	41.2438	41.321	73.0143	45.8972	50.5042	50.4405	49.6176	49.8194	49.8865	86.5158
68.7227	45.8884	42.5522	42.5393	41.2911	41.736	41.6677	88.2789	34.848	44.4457	42.8917	43.5269	43.9185	43.9185	84.5775	56.7157	52.9027	49.9805	51.4734	51.9583	51.9583	77.0308	52.9125	48.5203	48.0001	47.6064	47.6541	47.7455	73.395	61.5351	49.5685	49.2613	48.7949	49.2368	49.5608	63.7665	40.3282	41.0488	40.3419	40.2941	40.4217	40.5806	73.975	51.071	49.5215	48.8975	48.7914	48.8832	49.0346	87.6541
69.6152	38.8452	41.548	40.6993	40.3871	40.7612	40.6318	89.4253	37.5603	43.2888	40.9211	42.436	42.7562	42.7562	85.676	53.5091	51.6915	47.6727	50.3869	50.7835	50.7835	78.0312	50.8156	47.5377	46.2551	46.807	46.6951	46.8258	74.3482	62.1654	48.4257	47.269	47.72	48.1052	48.5148	64.5946	40.1001	40.1608	38.8717	39.5985	39.6112	39.8508	74.9358	55.112	48.5444	47.363	47.9788	47.9588	48.1938	88.7925
70.5077	40.6971	40.5498	38.8743	39.5014	39.8016	39.6118	90.5718	44.3824	42.1431	38.9804	41.3672	41.6133	41.6133	86.7744	54.5546	50.4887	45.4018	49.3229	49.6278	49.6277	79.0316	52.4721	46.5602	44.5226	46.0215	45.7487	45.9183	75.3014	52.6957	47.2911	45.2957	46.664	46.9892	47.4827	65.4228	44.0491	39.279	37.415	38.9158	38.8122	39.1318	75.8965	51.8647	47.5731	45.8393	47.1796	47.0463	47.3642	89.9309
71.4002	43.7298	39.5585	37.0696	38.634	38.8572	38.6081	91.7183	48.3634	41.0094	37.074	40.3205	40.49	40.49	87.8728	54.5027	49.2951	43.1729	48.2812	48.4912	48.4912	80.032	48.8006	45.5883	42.806	45.2499	44.8153	45.0232	76.2545	52.1418	46.1655	43.3456	45.627	45.8893	46.4649	66.2509	47.5602	38.4038	35.9743	38.2458	38.0249	38.4233	76.8572	47.4501	46.6081	44.3283	46.3938	46.1459	46.5457	91.0692
72.2927	45.8324	38.5745	35.29	37.7846	37.9284	37.6211	92.8648	43.3791	39.8883	35.2062	39.2959	39.3869	39.3869	88.9712	53.4808	48.1114	40.9904	47.2614	47.374	47.374	81.0324	44.6601	44.6225	41.1085	44.4921	43.8949	44.1405	77.2077	49.1823	45.0495	41.423	44.609	44.8058	45.4616	67.079	45.4765	37.5356	34.5522	37.5883	37.2493	37.7254	77.8179	46.5284	45.6498	42.8321	45.6213	45.2578	45.7384	92.2076
73.1852	44.6449	37.5987	33.5401	36.9532	37.0152	36.6512	94.0113	42.051	38.7805	33.3806	38.2934	38.3042	38.3042	90.0696	52.3462	46.9381	38.8586	46.2632	46.2761	46.2761	82.0328	46.7809	43.6633	39.4332	43.7478	42.9878	43.2704	78.1609	53.8241	43.9436	39.5319	43.6102	43.7389	44.4731	67.9072	45.0774	36.6749	33.1507	36.9431	36.4855	37.038	78.7786	43.4787	44.6987	41.3526	44.8619	44.3818	44.9422	93.346
74.0777	44.9481	36.6316	31.8241	36.1396	36.1179	35.6984	95.1577	41.3359	37.6866	31.6004	37.3128	37.2421	37.2421	91.168	51.3795	45.776	36.7812	45.2865	45.1977	45.1977	83.0332	44.8969	42.7111	37.7828	43.0169	42.0939	42.4129	79.1141	53.4665	42.8486	37.6758	42.6305	42.6891	43.4994	68.7353	41.7013	35.822	31.772	36.3101	35.7335	36.3612	79.7393	44.8506	43.755	39.8916	44.1155	43.5182	44.1572	94.4843
74.9702	39.5546	35.6739	30.1458	35.3436	35.2366	34.7631	96.3042	37.8394	36.6071	29.8688	36.3542	36.2008	36.2008	92.2664	48.698	44.6257	34.7615	44.3308	44.1387	44.1387	84.0336	45.086	41.7664	36.1602	42.2992	41.2135	41.5681	80.0673	48.846	41.7648	35.8579	41.6698	41.6564	42.5407	69.5634	37.0223	34.9774	30.4181	35.689	34.9933	35.6947	80.7	41.6688	42.8193	38.4508	43.3819	42.667	43.3833	95.6227
75.8627	38.352	34.7261	28.5087	34.5649	34.3713	33.8453	97.4507	37.0412	35.5426	28.1883	35.4171	35.1804	35.1804	93.3648	47.71	43.4876	32.8023	43.3959	43.099	43.099	85.034	44.8936	40.8296	34.5676	41.5946	40.3466	40.736	81.0205	42.566	40.6929	34.0813	40.728	40.641	41.5971	70.3916	34.8098	34.1414	29.0907	35.0796	34.265	35.0386	81.6608	44.5006	41.8917	37.0318	42.6609	41.8283	42.6205	96.7611
76.7552	35.4413	33.7888	26.9158	33.8033	33.522	32.9452	98.5972	38.2561	34.4936	26.561	34.5016	34.1811	34.1811	94.4632	46.0355	42.3624	30.9062	42.4813	42.0787	42.0787	86.0344	46.1508	39.9011	33.0074	40.9028	39.4932	39.9167	81.9736	35.7642	39.6334	32.3487	39.8052	39.6432	40.6688	71.2197	33.4722	33.3142	27.7915	34.4819	33.5485	34.3928	82.6215	49.6803	40.9727	35.636	41.9525	41.0019	41.8687	97.8994
77.6477	35.1205	32.8624	25.3697	33.0587	32.6888	32.0628	99.7436	42.2731	33.4606	24.9888	33.6074	33.2028	33.2028	95.5616	41.9036	41.2506	29.075	41.5868	41.0776	41.0776	87.0348	48.4196	38.9813	31.4816	40.2237	38.6533	39.1101	82.9268	29.9131	38.5867	30.6624	38.9011	38.663	39.7558	72.0478	28.5818	32.4964	26.5219	33.8954	32.8438	33.7572	83.5822	49.652	40.0626	34.2648	41.2564	40.1881	41.1279	99.0378
78.5402	32.5753	31.9476	23.8728	32.3306	31.8717	31.1981	100.89	37.9737	32.444	23.4731	32.7343	32.2456	32.2456	96.6601	40.8331	40.1526	27.3104	40.712	40.0957	40.0957	88.0352	44.5757	38.0707	29.9919	39.5571	37.8271	38.3162	83.88	26.1801	37.5533	29.0244	38.0156	37.7004	38.8582	72.876	32.2367	31.6881	25.2832	33.3202	32.1509	33.1317	84.5429	43.7612	39.1617	32.9194	40.5726	39.3866	40.3979	100.176
79.4327	34.3831	31.0447	22.4269	31.619	31.0706	30.3513	102.037	36.5993	31.4442	22.0152	31.8819	31.3094	31.3094	97.7585	37.1635	39.0689	25.6136	39.8566	39.1328	39.1328	89.0356	40.4066	37.1694	28.5401	38.9027	37.0144	37.535	84.8332	27.6185	36.5336	27.4366	37.1485	36.7556	37.9758	73.7041	34.9908	30.8896	24.0765	32.756	31.4696	32.5163	85.5036	39.3039	38.2702	31.6011	39.9007	38.5976	39.6789	101.315
80.3252	35.9435	30.1542	21.0337	30.9234	30.2855	29.5221	103.183	36.4451	30.4616	20.6157	31.05	30.3941	30.3941	98.8569	35.6821	38	23.9853	39.0201	38.1889	38.1889	90.036	35.7948	36.278	27.1275	38.2604	36.2153	36.7664	85.7864	31.6758	35.528	25.9003	36.2997	35.8286	37.1089	74.5322	34.0266	30.1013	22.903	32.2025	30.8001	31.9108	86.4643	37.917	37.3886	30.3108	39.2408	37.8211	38.9707	102.453
81.2177	33.1179	29.2765	19.6943	30.2436	29.5162	28.7107	104.33	30.8803	29.4964	19.2753	30.2383	29.4997	29.4998	99.9553	33.6714	36.9462	22.4262	38.2023	37.2637	37.2637	91.0364	32.7618	35.3967	25.7553	37.6299	35.4298	36.0106	86.7395	31.5272	34.537	24.4168	35.4688	34.9194	36.2572	75.3604	30.632	29.3234	21.7633	31.6596	30.1421	31.3152	87.425	27.7291	36.5169	29.0494	38.5925	37.0569	38.2731	103.591
82.1102	28.042	28.412	18.4096	29.5794	28.7628	27.9168	105.476	26.3144	28.5491	17.994	29.4465	28.6261	28.6261	101.054	32.7976	35.9079	20.9362	37.4027	36.3572	36.3572	92.0368	25.1245	34.5259	24.4246	37.0112	34.6577	35.2672	87.6927	29.0427	33.5607	22.9869	34.6558	34.0278	35.4209	76.1885	25.2162	28.5561	20.6582	31.1271	29.4957	30.7294	88.3858	25.6625	35.6556	27.8178	37.9557	36.305	37.5862	104.73
83.0027	24.7692	27.561	17.1801	28.9304	28.025	27.1405	106.623	22.1249	27.6198	16.7718	28.6742	27.7731	27.7731	102.152	29.5585	34.8855	19.5153	36.621	35.4691	35.4691	93.0372	22.3547	33.6657	23.1361	36.4039	33.8991	34.5364	88.6459	24.9532	32.5996	21.6113	33.8605	33.1539	34.5998	77.0167	19.8714	27.7996	19.5882	30.6048	28.8607	30.1533	89.3465	26.2549	34.8048	26.6166	37.3302	35.5654	36.9099	105.868
83.8952	18.5398	26.7239	16.0062	28.2963	27.3028	26.3815	107.769	19.0708	26.7088	15.6084	27.9212	26.9404	26.9405	103.251	29.0619	33.8793	18.163	35.8569	34.5993	34.5993	94.0376	22.425	32.8166	21.8905	35.8079	33.1538	33.818	89.5991	22.3276	31.6538	20.2904	33.0824	32.2977	33.7939	77.8448	17.4358	27.0543	18.5538	30.0926	28.2371	29.5867	90.3072	25.2427	33.9647	25.4465	36.7159	34.838	36.2441	107.006
84.7877	16.2203	25.9009	14.8878	27.6769	26.596	25.6397	108.915	18.607	25.8162	14.5031	27.1871	26.128	26.1281	104.349	22.4297	32.8895	16.8784	35.1099	33.7476	33.7476	95.038	21.2105	31.9787	20.6883	35.2229	32.4219	33.112	90.5523	19.8473	30.7238	19.0243	32.3214	31.4589	33.0031	78.6729	15.2085	26.3201	17.5551	29.5901	27.6247	29.0295	91.2679	22.5379	33.1355	24.308	36.1126	34.1227	35.5886	108.145
85.6802	14.5741	25.0923	13.8245	27.0719	25.9045	24.915	110.062	16.83	24.9423	13.4551	26.4715	25.3356	25.3357	105.447	16.356	31.9165	15.6607	34.3798	32.9137	32.9137	96.0384	18.9791	31.1522	19.5298	34.6488	31.7031	32.4182	91.5055	17.9838	29.8097	17.8129	31.5773	30.6375	32.2272	79.5011	13.4976	25.5974	16.5925	29.0973	27.0236	28.4818	92.2286	19.0237	32.3175	23.2014	35.5201	33.4195	34.9434	109.283
86.5727	12.2095	24.2985	12.8159	26.4809	25.2281	24.2072	111.208	11.2286	24.0873	12.4635	25.7742	24.563	24.5631	106.546	10.3724	30.9604	14.5086	33.6661	32.0975	32.0975	97.0388	16.3337	30.3375	18.415	34.0854	30.9975	31.7366	92.4586	14.776	28.9118	16.656	30.8498	29.8334	31.4663	80.3292	10.8159	24.8863	15.6659	28.6139	26.4335	27.9433	93.1893	15.9935	31.5109	22.1272	34.9382	32.7283	34.3085	110.421
87.4652	9.80983	23.5195	11.8611	25.9036	24.5667	23.5162	112.355	7.72488	23.2511	11.5271	25.0946	23.8099	23.81	107.644	7.51642	30.0215	13.4206	32.9686	31.2987	31.2987	98.0392	10.7545	29.5347	17.3441	33.5325	30.3048	31.067	93.4118	11.3924	28.0302	15.553	30.1385	29.0464	30.7201	81.1573	7.62852	24.1869	14.7752	28.1398	25.8543	27.4139	94.1501	10.3279	30.7157	21.0854	34.3668	32.049	33.6836	111.56
88.3577	6.06628	22.7555	10.9593	25.3399	23.92	22.8416	113.501	4.12261	22.4339	10.6445	24.4325	23.0761	23.0762	108.743	4.22849	29.1	12.3951	32.2868	30.5171	30.5171	99.0396	6.89238	28.744	16.3167	32.9899	29.6251	30.4094	94.365	7.6461	27.1651	14.5033	29.4433	28.2764	29.9886	81.9855	4.12057	23.4994	13.9202	27.6748	25.286	26.8936	95.1108	6.26573	29.9321	20.0763	33.8057	31.3814	33.0688	112.698
[truncated: 6 more columns]

## Sheet: WAT-93
spike_1							spike_2							spike_3							spike_4							spike_5							spike_6							spike_7							spike_8
Z-axis_1	Thickness-profile_1	skewed gaussian_1	gaussian_1	lognorm_1	gamma_1	chi2_1	Z-axis_2	Thickness-profile_2	skewed gaussian_2	gaussian_2	lognorm_2	gamma_2	chi2_2	Z-axis_3	Thickness-profile_3	skewed gaussian_3	gaussian_3	lognorm_3	gamma_3	chi2_3	Z-axis_4	Thickness-profile_4	skewed gaussian_4	gaussian_4	lognorm_4	gamma_4	chi2_4	Z-axis_5	Thickness-profile_5	skewed gaussian_5	gaussian_5	lognorm_5	gamma_5	chi2_5	Z-axis_6	Thickness-profile_6	skewed gaussian_6	gaussian_6	lognorm_6	gamma_6	chi2_6	Z-axis_7	Thickness-profile_7	skewed gaussian_7	gaussian_7	lognorm_7	gamma_7	chi2_7	Z-axis_8
0	0.00959	1.19472	8.69039	0.419674	0	0	0	2.18151	1.27344	7.16111	0.273456	0	0	0	3.02449	2.68333	3.49824	2.27862	2.16075	2.16073	0	1.82933	2.50456	9.14513	1.2307	0	0	0	4.77911	6.34459	21.1146	5.24166	0	0	0	3.51069	2.24163	12.1084	0.605667	0	0	0	3.03376	0.71542	10.8573	0.00273509	0	0	0
0.88345	2.9746	1.53027	9.24426	0.7245	0	0	0.872841	2.62874	1.56974	7.69242	0.456757	0	0	0.882111	3.19251	2.97183	3.80954	2.56113	2.44105	2.44102	0.902306	2.7897	2.99251	9.67621	1.74643	0.194575	0.194519	0.972713	5.14901	7.77576	22.1521	7.01176	1.30842	1.30758	0.981064	3.7442	2.79139	12.7758	1.09415	0	0	0.888866	3.23706	0.999794	11.4771	0.0389319	0	0	1.02444
1.7669	3.31845	1.93977	9.82124	1.15336	0	0	1.74569	2.92359	1.92103	8.25142	0.717986	0	0	1.76422	3.37222	3.28455	4.14237	2.87009	2.74848	2.74845	1.80461	3.16595	3.55052	10.2267	2.37832	0.768985	0.768902	1.94543	6.15782	9.42073	23.2139	9.03113	4.30863	4.30782	1.96213	4.29126	3.44273	13.4654	1.78002	0	0	1.77773	3.7612	1.37427	12.1182	0.186825	0	0	2.04888
2.65034	3.20729	2.43362	10.4213	1.72109	0	0	2.61853	2.83808	2.33408	8.83848	1.07239	0.0663535	0.0663381	2.64633	3.34768	3.6227	4.49758	3.20686	3.08445	3.08443	2.70692	3.31272	4.1834	10.7964	3.12825	1.61349	1.61339	2.91814	6.64525	11.285	24.2984	11.2706	7.70743	7.70676	2.94319	4.50006	4.20584	14.1771	2.67506	0	0	2.6666	3.92595	1.8583	12.7804	0.539002	0	0	3.07332
3.53379	3.27295	3.02214	11.0444	2.4368	0.282167	0.281745	3.49137	2.70533	2.81575	9.45386	1.53359	0.327348	0.327316	3.52844	3.0799	3.98746	4.87599	3.57275	3.45035	3.45032	3.60922	2.97645	4.89526	11.3851	3.99453	2.66509	2.66499	3.89086	6.11391	13.3684	25.4044	13.6958	11.2567	11.2561	3.92425	4.2706	5.08995	14.9103	3.7795	0.16147	0	3.55547	3.66798	2.47235	13.4631	1.16583	0	0	4.09776
4.41724	3.03035	3.71519	11.6902	3.30368	1.15837	1.15779	4.36422	2.78613	3.37283	10.0977	2.11277	0.810359	0.810315	4.41055	2.75237	4.37997	5.27837	3.96902	3.84744	3.84741	4.51153	3.15811	5.68934	11.9924	4.97233	3.87749	3.87739	4.86357	6.19855	15.664	26.5301	16.2695	14.8362	14.8358	4.90532	3.65212	6.10282	15.6645	5.08385	1.8187	1.04189	4.44433	3.6449	3.23697	14.1659	2.10168	0	0	5.1222
5.30069	4.06659	4.52167	12.3584	4.31942	2.38678	2.38616	5.23706	3.53777	4.0118	10.7702	2.81811	1.51482	1.51477	5.29266	3.64782	4.80128	5.70545	4.39683	4.27691	4.27688	5.41384	3.95139	6.56781	12.618	6.05415	5.21387	5.21378	5.83628	10.8838	18.1578	27.6738	18.9537	18.3749	18.3747	5.88638	4.47631	7.25025	16.4393	6.57119	3.95067	3.23355	5.33319	4.66548	4.17146	14.8882	3.34714	0	0	6.14664
6.18414	4.68947	5.44901	13.0487	5.47687	3.85729	3.85669	6.10991	4.16765	4.73865	11.471	3.65446	2.42858	2.42852	6.17477	4.64717	5.25241	6.15792	4.85723	4.73984	4.73981	6.31614	5.09438	7.53158	13.2614	7.23038	6.64389	6.64381	6.809	17.55	20.829	28.8335	21.7109	21.827	21.8268	6.86744	5.74614	8.5356	17.2338	8.21941	6.28261	5.67809	6.22206	5.12513	5.29243	15.6292	4.87767	0.921216	0	7.17108
7.06759	4.99813	6.50267	13.7604	6.76491	5.49843	5.49788	6.98275	4.5154	5.55863	12.2002	4.62318	3.53354	3.53348	7.05688	4.95795	5.73425	6.63638	5.35115	5.23717	5.23714	7.21845	5.46917	8.58015	13.9221	8.4898	8.1421	8.14203	7.78172	22.7242	23.6497	30.0073	24.5057	25.1615	25.1614	7.8485	6.3682	9.95936	18.0473	10.0032	8.705	8.21905	7.11093	4.99242	6.61218	16.3881	6.65291	3.92533	0	8.19552
7.95104	5.70792	7.68564	14.493	8.16938	7.25791	7.25743	7.85559	4.19445	6.47603	12.9573	5.72228	4.80854	4.80849	7.93899	5.00041	6.24763	7.14138	5.8794	5.76967	5.76964	8.12075	6.08876	9.71149	14.5992	9.82012	9.68686	9.6868	8.75443	28.189	26.586	31.1928	27.3049	28.3578	28.3578	8.82957	6.60962	11.5188	18.879	11.8957	11.1555	10.7811	7.99979	5.09784	8.13718	17.164	8.62457	6.97946	3.78475	9.21996
8.83449	7.65561	8.99799	15.2457	9.674	9.09534	9.09493	8.72844	4.84803	7.49389	13.7418	6.9466	6.23109	6.23103	8.8211	5.92248	6.79323	7.67338	6.4426	6.33798	6.33795	9.02306	8.86903	10.922	15.2923	11.2084	11.2597	11.2597	9.72714	41.6876	29.599	32.3878	30.0787	31.4017	31.4018	9.81063	9.91249	13.2076	19.7277	13.87	13.5938	13.3198	8.88866	6.63475	9.86665	17.9558	10.7421	9.95715	7.7437	10.2444
9.71794	9.58569	10.4365	16.0177	11.2612	10.9785	10.9782	9.60128	6.08071	8.61385	14.5532	8.2882	7.77838	7.77833	9.70321	6.30128	7.37161	8.23274	7.04124	6.94254	6.94251	9.92537	12.2008	12.2063	16.0002	12.6416	12.8448	12.8448	10.6999	49.1771	32.6465	33.5899	32.8006	34.2843	34.2844	10.7917	14.4943	15.016	20.5924	15.8998	15.9922	15.8062	9.77752	9.77908	11.7916	18.7624	12.9568	12.8154	11.3212	11.2688
10.6014	10.5848	11.9945	16.8079	12.9127	12.8815	12.8812	10.4741	7.05851	9.83589	15.3905	9.73675	9.428	9.42796	10.5853	6.03143	7.9832	8.81974	7.67561	7.58358	7.58356	10.8277	14.4772	13.5575	16.7223	14.1066	14.4287	14.4287	11.6726	52.1703	35.6841	34.7964	35.4477	37	37.0002	11.7728	18.1985	16.9306	21.4719	17.9605	18.3313	18.2208	10.6664	13.5546	13.8941	19.5825	15.2236	15.5347	14.586	12.2933
11.4848	10.2151	13.6617	17.6152	14.6104	14.783	14.7828	11.347	7.47593	11.1582	16.253	11.28	11.1584	11.1583	11.4674	4.89183	8.62824	9.43454	8.34578	8.26116	8.26113	11.73	15.6899	14.9672	17.4573	15.5907	15.9996	15.9996	12.6453	49.671	38.6676	36.0048	38.0004	39.5463	39.5465	12.7538	20.4872	18.9347	22.3649	20.0295	20.5967	20.5501	11.5553	17.4741	16.1478	20.4149	17.5029	18.1061	17.5759	13.3177
12.3683	12.3495	15.4243	18.4384	16.3366	16.6656	16.6654	12.2198	10.6828	12.5769	17.1394	12.9043	12.9491	12.9491	12.3495	4.46556	9.30684	10.0772	9.05165	8.97508	8.97505	12.6323	18.1016	16.4253	18.2043	17.082	17.5477	17.5477	13.618	44.9554	41.5544	37.2122	40.4425	41.9225	41.9227	13.7349	22.2701	21.0087	23.27	22.0862	22.7784	22.7849	12.4441	22.2119	18.5184	21.258	19.7606	20.526	20.317	14.3422
13.2517	15.5496	17.2654	19.2763	18.0745	18.5149	18.5149	13.0927	14.7975	14.0864	18.0484	14.5948	14.781	14.781	13.2317	5.38376	10.0189	10.7476	9.79288	9.72492	9.7249	13.5346	20.6145	17.9208	18.9621	18.569	19.0645	19.0645	14.5907	42.8989	44.3054	38.4159	42.7611	44.1297	44.1299	14.7159	27.1243	23.1306	24.1857	24.1126	24.8689	24.9189	13.333	25.2331	20.9651	22.1104	21.9686	22.7941	22.8302	15.3666
14.1352	18.461	19.1651	20.1272	19.8084	20.3194	20.3194	13.9655	16.8442	15.6788	18.9788	16.3365	16.6365	16.6364	14.1138	6.16966	10.7641	11.4455	10.5689	10.51	10.51	14.4369	21.7167	19.4415	19.7292	20.0415	20.5429	20.5429	15.5634	36.7276	46.8864	39.6127	44.946	46.1702	46.1704	15.697	30.5185	25.2765	25.1105	26.0931	26.8634	26.948	14.2219	25.6605	23.4426	22.9703	24.1038	24.9123	25.1327	16.391
15.0186	21.3551	21.1014	20.9897	21.524	22.0694	22.0694	14.8383	18.9798	17.3445	19.9287	18.1138	18.4993	18.4992	14.9959	7.6063	11.5419	12.1707	11.3789	11.3295	11.3295	15.3392	21.959	20.9745	20.5045	21.4898	21.9768	21.9769	16.5361	35.8307	49.2691	40.7998	46.9897	48.0472	48.0474	16.6781	30.8771	27.4216	26.0426	28.0144	28.7583	28.87	15.1107	24.4578	25.9037	23.8361	26.1481	26.8836	27.2393	17.4155
15.9021	26.0539	23.0508	21.862	23.2082	23.7573	23.7573	15.7112	22.4835	19.0719	20.8965	19.9114	20.3547	20.3547	15.878	11.2429	12.3517	12.9225	12.2218	12.1822	12.1822	16.2415	24.2668	22.5064	21.2863	22.9054	23.3614	23.3614	17.5089	42.5867	51.4322	41.9741	48.887	49.7647	49.7649	17.6591	30.2261	29.5409	26.9803	29.8654	30.5519	30.6838	15.9996	25.6341	28.3016	24.7059	28.0879	28.7118	29.1635	18.4399
16.7855	31.4579	24.9891	22.7424	24.8498	25.3769	25.377	16.584	25.8252	20.8479	21.8802	21.7147	22.1895	22.1895	16.7601	14.5978	13.1924	13.7004	13.0963	13.0668	13.0668	17.1438	27.8235	24.0237	22.0733	24.281	24.6924	24.6925	18.4816	53.3424	53.3613	43.1324	50.6348	51.3274	51.3276	18.6402	36.0128	31.61	27.9217	31.6369	32.243	32.3893	16.8884	27.6579	30.5925	25.5778	29.9132	30.4016	30.9173	19.4644
17.669	34.4811	26.8923	23.6289	26.4387	26.9235	26.9236	17.4569	26.7996	22.658	22.8777	23.5094	23.992	23.992	17.6422	16.349	14.0629	14.5035	14.0009	13.9815	13.9815	18.0461	30.2905	25.5132	22.8638	25.6098	25.9667	25.9667	19.4543	59.9246	55.0494	44.2717	52.2318	52.7402	52.7404	19.6213	39.1941	33.6059	28.8648	33.3219	33.8319	33.9873	17.7773	28.73	32.7381	26.4499	31.6173	31.9577	32.5114	20.4888
18.5524	34.5731	28.7372	24.5196	27.9665	28.3935	28.3936	18.3297	26.774	24.4868	23.8867	25.2822	25.7516	25.7516	18.5243	17.0956	14.9619	15.3308	14.9339	14.9245	14.9244	18.9484	31.7674	26.9622	23.6561	26.8864	27.1815	27.1816	20.427	63.0225	56.4957	45.3887	53.6784	54.0085	54.0087	20.6023	37.8882	35.5077	29.8078	34.9149	35.3191	35.4792	18.6662	32.0729	34.7072	27.32	33.1961	33.3854	33.9562	21.5132
19.4359	32.5141	30.5026	25.4124	29.426	29.7842	29.7843	19.2026	26.0299	26.3179	24.9047	27.021	27.4592	27.4592	19.4064	17.8569	15.8875	16.1812	15.893	15.8936	15.8936	19.8507	30.0949	28.3586	24.4484	28.106	28.335	28.3351	21.3997	63.7805	57.7056	46.4802	54.9762	55.1377	55.1379	21.5834	36.5673	37.2973	30.7485	36.412	36.7058	36.8669	19.555	39.3613	36.4765	28.1861	34.648	34.6898	35.2609	22.5377
20.3193	34.3203	32.1695	26.305	30.8117	31.0938	31.094	20.0754	26.8628	28.1349	25.9293	28.7146	29.1071	29.1071	20.2885	20.2923	16.838	17.0534	16.8763	16.8865	16.8864	20.753	29.1761	29.6917	25.2391	29.2648	29.4257	29.4258	22.3724	59.8038	58.6895	47.5432	56.1278	56.1336	56.1338	22.5644	36.5648	38.9596	31.6849	37.8105	37.9937	38.1527	20.4439	43.9217	38.0321	29.0461	35.973	35.8763	36.4342	23.5621
21.2028	32.7656	33.7219	27.1953	32.1188	32.3214	32.3215	20.9483	28.5991	29.9213	26.9578	30.353	30.6884	30.6884	21.1706	22.0045	17.8113	17.9458	17.881	17.9005	17.9005	21.6554	30.1226	30.9519	26.0261	30.3599	30.4528	30.4528	23.3451	54.6191	59.4617	48.5745	57.137	57.0019	57.0021	23.5455	37.0638	40.4831	32.6146	39.1092	39.1849	39.339	21.3328	44.4431	39.3682	29.8977	37.1727	36.95	37.4843	24.5866
22.0862	28.6954	35.1474	28.0809	33.3441	33.4664	33.4666	21.8211	30.1305	31.6612	27.9872	31.9275	32.1975	32.1975	22.0527	20.5406	18.805	18.8569	18.9045	18.9329	18.9329	22.5577	31.3908	32.1311	26.8077	31.3889	31.4155	31.4156	24.3179	48.9788	60.039	49.571	58.0081	57.7484	57.7486	24.5266	36.7445	41.8599	33.5355	40.3076	40.2816	40.4287	22.2216	44.601	40.4872	30.7386	38.2498	37.9162	38.4187	25.611
22.9697	30.2414	36.4368	28.9595	34.4851	34.5292	34.5293	22.6939	31.4279	33.3395	29.0147	33.4304	33.6298	33.6299	22.9349	19.6634	19.8165	19.7847	19.944	19.9807	19.9807	23.46	30.4628	33.2228	27.5819	32.3503	32.314	32.314	25.2906	44.2294	60.4404	50.5297	58.7461	58.3789	58.379	25.5076	37.6673	43.0854	34.4454	41.4061	41.2865	41.4248	23.1105	44.5567	41.3983	31.5667	39.208	38.78	39.2446	26.6354
23.8531	36.3111	37.5848	29.8285	35.5404	35.5101	35.5103	23.5668	37.3076	34.9421	30.0373	34.8554	34.9817	34.9817	23.817	22.77	20.8431	20.7274	20.9963	21.0407	21.0407	24.3623	32.4033	34.2221	28.3466	33.2431	33.1483	33.1483	26.2633	48.3013	60.6852	51.4476	59.3565	58.899	58.8991	26.4887	40.7672	44.1589	35.342	42.406	42.2023	42.3303	23.9994	41.5548	42.1156	32.3795	40.0516	39.5465	39.9687	27.6599
24.7366	41.8509	38.5892	30.6856	36.5094	36.4103	36.4105	24.4396	41.1106	36.4568	31.0517	36.1973	36.2501	36.2501	24.6991	26.0062	21.8818	21.6826	22.0581	22.1095	22.1095	25.2646	33.5677	35.126	29.1	34.0668	33.9189	33.9189	27.236	58.7051	60.7927	52.3218	59.845	59.3144	59.3145	27.4698	45.1692	45.0822	36.2229	43.3092	43.0317	43.1484	24.8882	38.2098	42.6573	33.1749	40.7855	40.2206	40.5974	28.6843
25.62	43.1398	39.4513	31.5282	37.3922	37.2311	37.2312	25.3125	41.4877	37.8727	32.0548	37.4518	37.4331	37.4332	25.5812	26.5939	22.9294	22.6481	23.1262	23.1836	23.1836	26.1669	37.0787	35.9327	29.8401	34.8215	34.6266	34.6266	28.2087	62.1653	60.7814	53.1496	60.2177	59.6306	59.6307	28.4508	46.5335	45.8603	37.0859	44.1179	43.7777	43.8823	25.7771	35.7315	43.0434	33.9505	41.4148	40.8071	41.1365	29.7088
26.5035	42.9854	40.1751	32.3538	38.1895	37.974	37.9741	26.1853	38.2244	39.181	33.0433	38.6158	38.5293	38.5294	26.4633	27.2396	23.9826	23.6214	24.1968	24.2596	24.2596	27.0692	37.4799	36.6423	30.5647	35.5077	35.2724	35.2724	29.1814	63.5414	60.6685	53.9283	60.4806	59.8531	59.8531	29.4319	44.8241	46.5	37.9287	44.8349	44.4434	44.5354	26.666	37.7918	43.2947	34.704	41.9449	41.3105	41.5916	30.7332
27.3869	42.8825	40.7669	33.16	38.9026	38.6409	38.641	27.0582	39.0085	40.3749	34.014	39.6872	39.538	39.538	27.3454	25.1388	25.038	24.5999	25.2664	25.3336	25.3336	27.9715	36.8135	37.2562	31.2718	36.1263	35.8574	35.8574	30.1541	62.1258	60.4695	54.6553	60.6401	59.9871	59.9872	30.413	47.6928	47.0101	38.7489	45.4633	45.0318	45.1108	27.5548	39.4329	43.4316	35.4333	42.3814	41.7354	41.9682	31.7576
28.2704	40.5648	41.2347	33.9441	39.5332	39.2339	39.234	27.931	39.8699	41.4496	34.9635	40.6645	40.4589	40.4589	28.2275	25.8565	26.0919	25.5808	26.3312	26.4019	26.4019	28.8738	37.7311	37.7768	31.9596	36.6785	36.3829	36.383	31.1269	59.7825	60.1979	55.3284	60.7023	60.0378	60.0378	31.394	47.5059	47.4005	39.5443	46.0064	45.546	45.6118	28.4437	42.7057	43.4731	36.136	42.7297	42.0862	42.2711	32.7821
29.1538	39.8305	41.5881	34.7038	40.0834	39.7551	39.7552	28.8038	40.0749	42.4022	35.8884	41.5474	41.2925	41.2925	29.1096	27.784	27.1406	26.5613	27.3875	27.4607	27.4607	29.7761	37.2625	38.2077	32.6259	37.1657	36.8504	36.8505	32.0996	56.0454	59.8656	55.9452	60.6734	60.0102	60.0102	32.3751	45.5321	47.6818	40.3126	46.4676	45.9889	46.0417	29.3326	43.1644	43.4362	36.81	42.9955	42.3669	42.5051	33.8065
30.0373	37.9749	41.8372	35.4365	40.5557	40.207	40.207	29.6767	39.8098	43.232	36.7856	42.336	42.0395	42.0395	29.9917	27.4803	28.1803	27.5383	28.4314	28.5062	28.5062	30.6784	35.6583	38.5534	33.2689	37.5897	37.2615	37.2615	33.0723	51.8945	59.4826	56.5038	60.5594	59.909	59.909	33.3561	45.6628	47.8651	41.0518	46.8507	46.3637	46.4037	30.2214	43.1029	43.3358	37.4532	43.184	42.5816	42.6747	34.831
30.9207	34.9955	41.9927	36.1399	40.9528	40.5918	40.5918	30.5495	40.4466	43.9398	37.6516	43.0311	42.7011	42.7011	30.8738	26.8497	29.2073	28.5088	29.4592	29.5346	29.5346	31.5807	35.1425	38.8191	33.8866	37.9524	37.6177	37.6177	34.045	49.1304	59.057	57.0022	60.3663	59.739	59.739	34.3372	48.0735	47.9611	41.7595	47.1592	46.6734	46.7008	31.1103	45.3159	43.1842	38.0636	43.3006	42.7342	42.7841	35.8554
31.8042	32.2698	42.0652	36.8116	41.2775	40.9121	40.9121	31.4224	42.4004	44.5281	38.4834	43.6341	43.2789	43.279	31.756	28.335	30.2176	29.4695	30.4669	30.542	30.542	32.483	31.1493	39.0101	34.4772	38.2559	37.9209	37.9209	35.0177	50.9642	58.5957	57.4387	60.0998	59.5047	59.5046	35.3183	53.1135	47.9803	42.4338	47.397	46.921	46.9362	31.9992	45.3656	42.9917	38.6391	43.3505	42.8284	42.8373	36.8798
32.6876	35.6962	42.0647	37.4494	41.5329	41.1704	41.1705	32.2952	43.0806	45.0008	39.2776	44.147	43.7748	43.7748	32.6381	30.5772	31.2073	30.4174	31.4509	31.5247	31.5247	33.3853	34.7908	39.1324	35.0388	38.5023	38.1728	38.1728	35.9904	53.3526	58.1041	57.812	59.7656	59.2103	59.2103	36.2993	54.8312	47.9327	43.0727	47.5678	47.1094	47.1129	32.888	44.0026	42.7663	39.1781	43.3384	42.8678	42.8381	37.9043
33.5711	37.199	42.0008	38.051	41.7221	41.3694	41.3694	33.1681	42.1364	45.363	40.0314	44.5721	44.1909	44.1909	33.5202	32.3661	32.1727	31.349	32.4075	32.479	32.479	34.2876	38.7635	39.1919	35.5698	38.694	38.3752	38.3752	36.9631	56.7611	57.5865	58.1206	59.369	58.8601	58.8601	37.2804	51.1542	47.8272	43.6742	47.6753	47.2414	47.2339	33.7769	40.8442	42.5144	39.6785	43.2692	42.8557	42.79	38.9287
34.4545	36.8618	41.8823	38.6144	41.8484	41.5116	41.5116	34.0409	42.1285	45.6205	40.7417	44.9121	44.5294	44.5294	34.4023	33.0417	33.1098	32.2611	33.3329	33.4015	33.4015	35.1899	37.0988	39.1943	36.0684	38.8333	38.5301	38.5301	37.9359	57.8778	57.0464	58.3636	58.9152	58.4581	58.458	38.2615	48.1815	47.6721	44.2365	47.7233	47.32	47.3019	34.6658	37.6271	42.2409	40.1389	43.1474	42.7955	42.6964	39.9531
35.338	38.2656	41.7172	39.1377	41.9151	41.5996	41.5996	34.9138	47.2625	45.7802	41.4057	45.1699	44.793	44.793	35.2844	34.2946	34.0151	33.1503	34.2238	34.2886	34.2886	36.0923	37.7159	39.1455	36.533	38.9226	38.6393	38.6393	38.9086	59.326	56.4864	58.54	58.4091	58.008	58.0079	39.2425	42.35	47.4746	44.7579	47.7152	47.3478	47.3199	35.5546	37.6795	41.9492	40.5577	42.9772	42.6903	42.5605	40.9776
36.2214	39.5097	41.5122	39.6189	41.9253	41.636	41.636	35.7866	50.6876	45.8489	42.0208	45.3488	44.9844	44.9844	36.1665	36.7351	34.8848	34.0134	35.0768	35.1371	35.1371	36.9946	40.213	39.0508	36.9623	38.9644	38.7047	38.7047	39.8813	61.1811	55.9087	58.6494	57.8554	57.5135	57.5134	40.2236	36.6456	47.2408	45.2368	47.6547	47.3275	47.2905	36.4435	39.757	41.6421	40.9334	42.7627	42.543	42.3853	42.002
37.1049	38.7477	41.2734	40.0563	41.8825	41.6235	41.6235	36.6594	51.0221	45.834	42.5845	45.4521	45.1063	45.1063	37.0486	36.5104	35.7156	34.8471	35.8888	35.9439	35.9439	37.8969	40.7232	38.9154	37.3548	38.9611	38.7283	38.7283	40.854	60.0401	55.3151	58.6913	57.2587	56.9781	56.9781	41.2046	34.6227	46.9763	45.6717	47.5451	47.2618	47.2163	37.3324	39.582	41.3215	41.2649	42.5079	42.3565	42.1738	43.0265
37.9883	38.1796	41.006	40.4485	41.7897	41.5644	41.5644	37.5323	47.9943	45.7429	43.0945	45.4835	45.1616	45.1616	37.9307	37.2445	36.5041	35.648	36.6567	36.7061	36.7061	38.7992	39.6118	38.744	37.7092	38.9151	38.712	38.712	41.8267	60.2745	54.7068	58.6656	56.6231	56.4053	56.4052	42.1857	33.3873	46.6855	46.0612	47.3898	47.1532	47.1	38.2212	39.8381	40.9889	41.5509	42.2162	42.1335	41.9285	44.0509
38.8717	38.3919	40.7142	40.7939	41.6503	41.4614	41.4614	38.4051	44.8514	45.5828	43.5487	45.4467	45.1534	45.1534	38.8128	38.0678	37.2471	36.4132	37.3777	37.421	37.421	39.7015	37.5139	38.5408	38.0245	38.8289	38.6576	38.6576	42.7994	56.9953	54.085	58.5724	55.9527	55.7981	55.798	43.1668	38.0792	46.3722	46.4041	47.192	47.0041	46.9439	39.1101	40.8631	40.6452	41.7904	41.8912	41.8767	41.6521	45.0753
39.7552	39.5002	40.4014	41.0913	41.4672	41.3169	41.3169	39.278	43.2635	45.3607	43.9453	45.3452	45.0846	45.0846	39.695	36.6981	37.9418	37.1394	38.0493	38.086	38.086	40.6038	33.5827	38.3097	38.2994	38.7048	38.567	38.567	43.7721	53.504	53.4507	58.4119	55.2512	55.1595	55.1594	44.1478	45.4911	46.0396	46.6993	46.9547	46.8169	46.7505	39.999	40.1065	40.2913	41.9828	41.5359	41.5885	41.3469	46.0998
40.6386	41.1787	40.0708	41.3396	41.2435	41.1333	41.1332	40.1508	45.146	45.0831	44.2824	45.1829	44.9583	44.9583	40.5771	38.1278	38.5855	37.8238	38.6691	38.6989	38.6989	41.5061	33.3561	38.0542	38.5332	38.5451	38.442	38.442	44.7449	56.8285	52.8048	58.1848	54.5223	54.4926	54.4925	45.1289	50.8003	45.6901	46.9459	46.6808	46.5939	46.5221	40.8878	39.6736	39.9279	42.1272	41.1536	41.2712	41.0153	47.1242
41.5221	41.4317	39.7246	41.5379	40.9821	40.9129	40.9128	41.0237	45.2463	44.7562	44.5589	44.9636	44.7776	44.7776	41.4592	39.3403	39.1758	38.4634	39.235	39.2578	39.2578	42.4084	35.6738	37.7773	38.7251	38.3522	38.2846	38.2846	45.7176	56.3486	52.1479	57.8918	53.7693	53.8	53.7998	46.11	48.5697	45.3259	47.1431	46.3734	46.3373	46.2608	41.7767	37.5658	39.5553	42.2233	40.7468	40.9272	40.6594	48.1487
42.4055	40.4247	39.3646	41.6855	40.6859	40.658	40.658	41.8965	44.1687	44.3859	44.7734	44.691	44.5455	44.5455	42.3413	40.7989	39.7103	39.0557	39.7452	39.7608	39.7608	43.3107	35.9975	37.4816	38.8744	38.1282	38.0964	38.0964	46.6903	56.2485	51.4809	57.5339	52.9953	53.0842	53.0841	47.091	49.8192	44.9485	47.2902	46.0349	46.0494	45.9688	42.6655	35.8613	39.174	42.2706	40.3184	40.5584	40.2813	49.1731
43.289	40.9051	38.9926	41.7818	40.3577	40.3709	40.3709	42.7694	44.3365	43.9771	44.925	44.3687	44.2651	44.2651	43.2234	40.9036	40.1873	39.5982	40.1981	40.2065	40.2065	44.213	36.066	37.1695	38.9806	37.8753	37.8792	37.8792	47.663	53.3047	50.8043	57.1124	52.2033	52.3479	52.3478	48.0721	49.568	44.5594	47.3868	45.668	45.732	45.6481	43.5544	35.9678	38.7845	42.269	39.8707	40.167	39.8828	50.1975
44.1724	43.3725	38.6097	41.8264	40	40.0537	40.0537	43.6422	44.7876	43.5347	45.0132	44.0004	43.9393	43.9393	44.1055	39.7642	40.6051	40.0884	40.5924	40.5937	40.5937	45.1153	36.1825	36.8429	39.0433	37.5956	37.6348	37.6348	48.6357	51.0582	50.1188	56.6286	51.3959	51.5933	51.5932	49.0532	47.5578	44.1597	47.4326	45.2751	45.3873	45.3008	44.4433	39.2564	38.3871	42.2186	39.4059	39.7549	39.4658	51.222
45.0559	43.6753	38.2169	41.8193	39.6153	39.7086	39.7085	44.515	44.0252	43.0629	45.0376	43.5896	43.5711	43.5711	44.9876	39.3845	40.9624	40.5243	40.927	40.9215	40.9215	46.0176	36.1498	36.5034	39.0625	37.2912	37.3648	37.3648	49.6084	55.4522	49.4251	56.0843	50.5758	50.8226	50.8225	50.0342	45.0352	43.7501	47.4274	44.8586	45.0171	44.9286	45.3321	40.5248	37.9821	42.1194	38.9263	39.3239	39.032	52.2464
45.9393	42.2434	37.815	41.7604	39.2061	39.3374	39.3373	45.3879	44.1568	42.5652	44.9979	43.1398	43.1634	43.1634	45.8697	42.2137	41.2582	40.9041	41.2013	41.189	41.189	46.9199	37.4721	36.1526	39.0379	36.9639	37.0708	37.0708	50.5811	54.9003	48.7238	55.4812	49.7454	50.0379	50.0378	51.0153	43.3943	43.3315	47.3712	44.4206	44.6233	44.5335	46.221	41.2215	37.5698	41.9718	38.4337	38.8757	38.583	53.2709
46.8228	40.1352	37.4048	41.6499	38.7746	38.9422	38.9422	46.2607	44.5449	42.045	44.8945	42.6542	42.7191	42.7191	46.7518	45.7591	41.4917	41.226	41.4148	41.3961	41.3961	47.8222	38.6394	35.7916	38.9697	36.6156	36.7544	36.7544	51.5539	52.9396	48.0154	54.8214	48.9068	49.2413	49.2412	51.9963	40.3464	42.9045	47.2643	43.9632	44.2076	44.117	47.1099	41.2848	37.1507	41.7764	37.9301	38.412	38.1204	54.2953
47.7062	37.338	36.9868	41.4883	38.3231	38.5249	38.5248	47.1336	42.8237	41.5051	44.7278	42.1362	42.2409	42.2409	47.6339	43.221	41.6625	41.4886	41.5672	41.5425	41.5425	48.7245	37.9863	35.4214	38.8581	36.2481	36.4171	36.4171	52.5266	50.3375	47.3006	54.1071	48.062	48.4344	48.4343	52.9774	44.4116	42.4696	47.1069	43.4885	43.7717	43.681	47.9987	40.6989	36.725	41.5338	37.417	37.9342	37.6456	55.3197
48.5897	36.9732	36.5616	41.2761	37.8536	38.0872	38.0872	48.0064	39.6151	40.9481	44.4984	41.5888	41.7315	41.7315	48.5161	39.5397	41.7706	41.6907	41.6586	41.6284	41.6284	49.6268	34.5611	35.043	38.7035	35.8631	36.0605	36.0605	53.4993	49.4182	46.58	53.3405	47.2131	47.6192	47.6191	53.9585	47.0129	42.0272	46.8996	42.9981	43.3173	43.227	48.8876	41.1112	36.2931	41.2449	36.8961	37.444	37.1598	56.3442
49.4731	39.4531	36.1297	41.0142	37.3681	37.631	37.6309	48.8793	40.9826	40.376	44.2073	41.0149	41.1935	41.1935	49.3982	38.9677	41.816	41.8316	41.6895	41.6541	41.6541	50.5291	36.5115	34.6572	38.5064	35.4623	35.6859	35.6859	54.472	50.8173	45.8541	52.5242	46.3616	46.7972	46.7971	54.9395	44.7494	41.5779	46.643	42.4939	42.8458	42.7565	49.7765	38.7904	35.8553	40.9106	36.3688	36.9426	36.6645	57.3686
50.3566	40.4954	35.6914	40.7034	36.8684	37.1578	37.1577	49.7521	41.0811	39.7908	43.8558	40.4175	40.6295	40.6294	50.2803	40.7364	41.7994	41.9105	41.6603	41.6204	41.6204	51.4315	38.3381	34.2645	38.2675	35.0472	35.2947	35.2947	55.4447	50.3184	45.1236	51.6609	45.5093	45.97	45.9699	55.9206	41.1471	41.122	46.338	41.9775	42.3588	42.2709	50.6653	37.8488	35.412	40.532	35.8364	36.4314	36.1608	58.3931
51.24	39.5705	35.2472	40.345	36.3562	36.6693	36.6692	50.6249	40.576	39.1941	43.4453	39.7992	40.0418	40.0418	51.1624	42.1965	41.7214	41.927	41.5719	41.5281	41.5281	52.3338	36.901	33.8656	37.9875	34.6192	34.8884	34.8884	56.4174	48.038	44.3891	50.7532	44.6575	45.1391	45.139	56.9017	40.0055	40.6598	45.9855	41.4505	41.8576	41.7717	51.5542	35.0608	34.9634	40.1105	35.3001	35.9116	35.6499	59.4175
52.1235	36.843	34.7974	39.9402	35.8333	36.1669	36.1668	51.4978	37.2047	38.5874	42.9776	39.1626	39.4329	39.4328	52.0445	41.771	41.5831	41.8812	41.4255	41.3783	41.3783	53.2361	37.2594	33.4609	37.6673	34.1799	34.4681	34.4681	57.3901	43.6333	43.6511	49.804	43.8077	44.3057	44.3056	57.8827	43.1649	40.1917	45.5867	40.9143	41.3436	41.2601	52.4431	32.4885	34.51	39.6475	34.761	35.3844	35.1327	60.4419
53.0069	35.0533	34.3426	39.4906	35.3011	35.6522	35.6521	52.3706	32.7005	37.9719	42.4546	38.5101	38.8049	38.8049	52.9266	38.4415	41.3858	41.7732	41.2223	41.1723	41.1723	54.1384	36.5938	33.051	37.3081	33.7304	34.0351	34.0351	58.3629	43.5055	42.9102	48.8163	42.9611	43.4712	43.4712	58.8638	41.7798	39.7181	45.1427	40.3701	40.8181	40.7374	53.3319	31.7417	34.052	39.1445	34.2203	34.8509	34.6103	61.4664
53.8904	35.6983	33.8829	38.9976	34.7612	35.1265	35.1264	53.2435	31.6606	37.3488	41.8784	37.844	38.1601	38.1601	53.8087	34.8449	41.131	41.6035	40.9638	40.9118	40.9118	55.0407	35.9846	32.6362	36.911	33.2721	33.5906	33.5906	59.3356	44.6696	42.167	47.793	42.1187	42.6368	42.6367	59.8448	38.3383	39.2393	44.6551	39.8194	40.2824	40.2048	54.2208	32.4013	33.5899	38.6032	33.6788	34.3121	34.0837	62.4908
54.7738	36.3359	33.4188	38.4631	34.2148	34.5912	34.5911	54.1163	30.9524	36.7191	41.2513	37.1666	37.5005	37.5005	54.6908	36.8833	40.8205	41.3728	40.6519	40.5983	40.5983	55.943	37.446	32.2169	36.4772	32.8062	33.1357	33.1357	60.3083	44.4976	41.4221	46.7374	41.2817	41.8036	41.8035	60.8259	38.0729	38.7556	44.1252	39.2633	39.7375	39.6634	55.1097	31.5807	33.1239	38.0253	33.1373	33.769	33.5537	63.5153
55.6573	35.9194	32.9507	37.8889	33.6633	34.0475	34.0474	54.9892	29.3043	36.0838	40.576	36.4797	36.828	36.828	55.5729	40.4983	40.4563	41.0822	40.2882	40.2339	40.2339	56.8453	35.2496	31.7936	36.0082	32.3337	32.6716	32.6716	61.281	43.2842	40.6759	45.6523	40.4509	40.9725	40.9724	61.807	38.8547	38.2674	43.5548	38.7028	39.1846	39.1143	55.9985	31.3852	32.6544	37.4127	32.5968	33.2225	33.0211	64.5397
56.5407	34.45	32.4788	37.2771	33.1078	33.4966	33.4965	55.862	27.588	35.4436	39.8551	35.7855	36.1447	36.1447	56.455	39.8698	40.0404	40.733	39.8751	39.8206	39.8206	57.7476	32.6828	31.3665	35.5055	31.8558	32.1992	32.1992	62.2537	39.0443	39.929	44.5411	39.6273	40.1446	40.1445	62.788	41.4079	37.775	42.9455	38.139	38.6247	38.5586	56.8874	30.7517	32.1817	36.7675	32.0579	32.6734	32.4867	65.5641
57.4242	33.3571	32.0036	36.6298	32.5494	32.9396	32.9395	56.7349	29.0843	34.7994	39.0914	35.0856	35.4521	35.4521	57.3372	37.223	39.5754	40.3267	39.4146	39.3605	39.3605	58.6499	29.8807	30.936	34.9707	31.3733	31.7197	31.7196	63.2264	37.658	39.1821	43.4069	38.8114	39.3207	39.3207	63.7691	40.0351	37.2786	42.2992	37.5729	38.0589	37.9971	57.7763	31.6294	31.7061	36.0915	31.5212	32.1227	31.9513	66.5886
58.3076	32.9507	31.5254	35.9491	31.9892	32.3777	32.3776	57.6077	31.9733	34.1519	38.2879	34.3817	34.7522	34.7522	58.2193	34.7323	39.0635	39.865	38.909	38.856	38.856	59.5522	28.7918	30.5024	34.4054	30.8874	31.2338	31.2338	64.1991	39.7182	38.4355	42.2529	38.0041	38.5017	38.5017	64.7502	37.3425	36.7788	41.618	37.0053	37.488	37.4309	58.6651	32.1303	31.228	35.3871	30.9873	31.571	31.4154	67.613
59.1911	33.2173	31.0445	35.2374	31.4282	31.8118	31.8117	58.4805	33.2893	33.5018	37.4476	33.6754	34.0463	34.0463	59.1014	33.842	38.5076	39.35	38.361	38.3096	38.3095	60.4545	29.3241	30.066	33.8113	30.3987	30.7426	30.7425	65.1719	38.2656	37.6898	41.0821	37.206	37.6884	37.6883	65.7312	36.3435	36.2756	40.9036	36.437	36.913	36.8608	59.554	32.415	30.7478	34.6562	30.4569	31.019	30.8798	68.6375
60.0745	30.3991	30.5613	34.497	30.8671	31.2429	31.2428	59.3534	32.2394	32.8498	36.5739	32.9681	33.3361	33.3361	59.9835	36.9914	37.9102	38.7839	37.7729	37.7236	37.7236	61.3568	28.2527	29.6271	33.1904	29.9082	30.2468	30.2468	66.1446	38.4044	36.9456	39.8978	36.4175	36.8814	36.8813	66.7123	37.6515	35.7696	40.1584	35.8689	36.3347	36.2876	60.4429	32.5708	30.2656	33.9012	29.9303	30.4674	30.345	69.6619
60.958	30.2997	30.0761	33.7304	30.3068	30.6719	30.6718	60.2262	33.0731	32.1965	35.6698	32.2612	32.623	32.623	60.8656	39.7401	37.2741	38.1691	37.1476	37.1009	37.1008	62.2591	28.9668	29.1861	32.5444	29.4166	29.7474	29.7474	67.1173	38.2383	36.2032	38.703	35.6391	36.0813	36.0813	67.6933	37.3244	35.2609	39.3843	35.3016	35.754	35.7121	61.3317	31.7965	29.7819	33.1242	29.408	29.9169	29.8116	70.6863
61.8414	28.7024	29.5892	32.9399	29.7482	30.0996	30.0996	61.0991	35.7452	31.5426	34.7387	31.5558	31.9084	31.9084	61.7477	38.9944	36.6024	37.5081	36.4875	36.4439	36.4439	63.1614	27.3904	28.7432	31.8753	28.9245	29.2451	29.2451	68.09	37.4647	35.4633	37.5007	34.8713	35.2889	35.2888	68.6744	36.4799	34.75	38.5837	34.7357	35.1715	35.135	62.2206	32.557	29.297	32.3277	28.8904	29.3679	29.28	71.7108
62.7249	29.9332	29.1011	32.1281	29.1917	29.527	29.5269	61.9719	37.1611	30.8886	33.7838	30.8533	31.1934	31.1934	62.6298	34.6646	35.8978	36.8037	35.7956	35.7554	35.7554	64.0637	28.1075	28.2986	31.185	28.4328	28.7406	28.7406	69.0627	37.8951	34.7261	36.294	34.1144	34.5045	34.5045	69.6555	33.2291	34.2371	37.7587	34.1719	34.588	34.557	63.1095	32.3086	28.8112	31.5138	28.3779	28.8211	28.7508	72.7352
63.6083	29.3306	28.612	31.2976	28.6382	28.9546	28.9546	62.8448	36.9544	30.2351	32.8086	30.1545	30.4793	30.4793	63.5119	34.0788	35.1633	36.0589	35.0745	35.0381	35.0381	64.9661	30.2415	27.8528	30.4756	27.9419	28.2347	28.2347	70.0354	37.3626	33.9924	35.0856	33.3687	33.7288	33.7287	70.6365	29.0766	33.7225	36.9116	33.6106	34.0042	33.9788	63.9983	31.8185	28.3248	30.6848	27.8708	28.277	28.2244	73.7597
64.4918	28.7931	28.1222	30.4507	28.0882	28.3833	28.3832	63.7176	36.708	29.5826	31.8162	29.4604	29.7671	29.7671	64.394	34.8116	34.402	35.2765	34.327	34.2948	34.2948	65.8684	29.1097	27.406	29.7489	27.4525	27.7279	27.7279	71.0081	35.5265	33.2623	33.8783	32.6346	32.9621	32.962	71.6176	29.953	33.2065	36.0448	33.0525	33.4207	33.401	64.8872	30.2603	27.8381	29.8431	27.3692	27.7359	27.7011	74.7841
65.3752	26.7416	27.632	29.5901	27.5422	27.8136	27.8136	64.5904	32.6374	28.9318	30.8101	28.772	29.058	29.058	65.2761	35.9798	33.6167	34.4599	33.556	33.5282	33.5282	66.7707	27.9843	26.9584	29.0071	26.965	27.221	27.221	71.9809	32.618	32.5365	32.675	31.9121	32.2048	32.2048	72.5987	30.2601	32.6894	35.1605	32.4979	32.838	32.8242	65.7761	28.5019	27.3513	28.991	26.8736	27.1983	27.1815	75.8085
66.2587	24.8945	27.1418	28.7182	27.0006	27.2463	27.2463	65.4633	30.1648	28.2831	29.7935	28.09	28.3527	28.3527	66.1582	36.7984	32.8104	33.612	32.7642	32.741	32.741	67.673	26.1394	26.5103	28.2522	26.48	26.7145	26.7145	72.9536	30.358	31.8152	31.478	31.2016	31.4574	31.4574	73.5797	28.5064	32.1716	34.261	31.9474	32.2569	32.2488	66.6649	26.6166	26.8649	28.1305	26.384	26.6647	26.6657	76.833
67.1421	26.3531	26.6519	27.8375	26.464	26.6818	26.6818	66.3361	31.6618	27.6371	28.7695	27.4151	27.6524	27.6524	67.0404	33.7517	31.986	32.7362	31.9544	31.9359	31.9359	68.5753	25.7613	26.0621	27.4862	25.9979	26.209	26.209	73.9263	29.697	31.0989	30.29	30.5031	30.7201	30.7201	74.5608	28.6189	31.6534	33.3487	31.4012	31.6777	31.6754	67.5538	27.0938	26.3791	27.2641	25.9007	26.1353	26.1542	77.8574
68.0256	26.7176	26.1626	26.9503	25.9328	26.1208	26.1208	67.209	31.386	26.9941	27.7412	26.7479	26.9576	26.9576	67.9225	29.4354	31.1463	31.8358	31.1291	31.1155	31.1155	69.4776	26.5748	25.6139	26.711	25.5191	25.705	25.705	74.899	28.6808	30.3881	29.1132	29.8167	29.9933	29.9933	75.5419	30.5027	31.1349	32.4258	30.8597	31.1009	31.1046	68.4426	27.3233	25.8941	26.3937	25.4239	25.6106	25.6472	78.8819
68.909	26.7921	25.6741	26.0592	25.4072	25.5637	25.5637	68.0818	31.2245	26.3548	26.7118	26.0892	26.2693	26.2693	68.8046	30.5155	30.2941	30.9142	30.2912	30.2825	30.2825	70.3799	25.414	25.166	25.9286	25.044	25.2029	25.2029	75.8717	27.7136	29.683	27.95	29.1426	29.2771	29.2771	76.5229	34.2874	30.6165	31.4945	30.3232	30.5271	30.5366	69.3315	27.0181	25.4102	25.5216	24.9536	25.0908	25.145	79.9063
69.7925	26.7291	25.1869	25.1663	24.8877	25.0109	25.0109	68.9547	28.2797	25.7195	25.684	25.4393	25.5881	25.5881	69.6867	31.8214	29.4321	29.9745	29.4431	29.4393	29.4393	71.2822	25.381	24.7187	25.141	24.5729	24.7033	24.7033	76.8444	26.6847	28.984	26.8023	28.4808	28.5719	28.5719	77.504	35.2598	30.0985	30.5571	29.792	29.9566	29.972	70.2204	25.9778	24.9278	24.6498	24.49	24.5762	24.6478	80.9307
70.6759	27.0533	24.701	24.2739	24.3744	24.463	24.463	69.8275	25.5632	25.0888	24.6607	24.7987	24.9146	24.9146	70.5688	32.7174	28.5629	29.0202	28.5873	28.5885	28.5885	72.1845	25.1255	24.2722	24.3501	24.1062	24.2066	24.2066	77.8171	26.4593	28.2914	25.6721	27.8313	27.8777	27.8777	78.485	34.6996	29.5812	29.6158	29.2664	29.3899	29.4111	71.1092	24.7555	24.4471	23.7802	24.0332	24.0671	24.1559	81.9552
71.5594	28.0503	24.2169	23.3841	23.8677	23.9203	23.9203	70.7004	27.3968	24.463	23.6446	24.1678	24.2493	24.2493	71.4509	31.2093	27.689	28.0545	27.7264	27.7324	27.7324	73.0868	26.2013	23.8268	23.5576	23.6441	23.7132	23.7132	78.7899	27.5647	27.6057	24.5612	27.1941	27.1948	27.1948	79.4661	33.216	29.0648	28.6726	28.7466	28.8273	28.8543	71.9981	24.6208	23.9683	22.9147	23.5833	23.5637	23.6695	82.9796
72.4428	27.2704	23.7347	22.4991	23.3678	23.3831	23.3831	71.5732	28.1947	23.8425	22.6381	23.547	23.5929	23.5929	72.333	28.1099	26.8128	27.0806	26.8625	26.8732	26.8732	73.9891	27.9059	23.3827	22.7655	23.1869	23.2233	23.2233	79.7626	26.3538	26.9271	23.4714	26.5693	26.5233	26.5234	80.4472	35.4619	28.5495	27.7296	28.2328	28.2692	28.3019	72.887	25.9646	23.4917	22.0553	23.1402	23.0663	23.1887	84.0041
73.3263	27.2784	23.2549	21.6207	22.8748	22.8518	22.8518	72.446	26.8632	23.2278	21.6438	22.9366	22.9458	22.9458	73.2151	28.7832	25.9366	26.1015	25.998	26.0133	26.0133	74.8914	27.7998	22.9401	21.9753	22.7348	22.7375	22.7375	80.7353	26.3436	26.2559	22.4041	25.9567	25.8634	25.8634	81.4282	35.3791	28.0357	26.7888	27.7251	27.7158	27.7542	73.7758	26.553	23.0176	21.2034	22.7041	22.5749	22.7137	85.0285
74.2097	25.0754	22.7775	20.7509	22.389	22.3267	22.3267	73.3189	24.3576	22.6192	20.6637	22.3369	22.3084	22.3084	74.0972	29.4367	25.0626	25.1205	25.1349	25.1546	25.1546	75.7937	27.371	22.4993	21.1889	22.2881	22.256	22.256	81.708	25.0601	25.5924	21.3607	25.3563	25.215	25.215	82.4093	35.6391	27.5237	25.8521	27.2238	27.1675	27.2115	74.6647	25.501	22.5461	20.361	22.275	22.0898	22.2447	86.0529
75.0932	22.135	22.3029	19.8915	21.9105	21.808	21.808	74.1917	20.7946	22.017	19.7	21.7479	21.681	21.681	74.9793	29.0851	24.1928	24.1404	24.2753	24.2992	24.2992	76.696	26.0431	22.0605	20.4078	21.8468	21.7791	21.7791	82.6807	23.347	24.9368	20.3424	24.768	24.5783	24.5783	83.3904	32.9409	27.0135	24.9214	26.729	26.6246	26.6741	75.5536	25.501	22.0775	19.5293	21.8529	21.6111	21.7818	87.0774
75.9766	21.2563	21.8312	19.044	21.4394	21.2961	21.2961	75.0646	21.0236	21.4216	18.7546	21.17	21.0641	21.0641	75.8615	28.6198	23.3291	23.164	23.4211	23.449	23.449	77.5983	24.4717	21.624	19.6335	21.4113	21.307	21.307	83.6534	23.8313	24.2894	19.3503	24.1918	23.9533	23.9533	84.3714	31.2311	26.5056	23.9983	26.2407	26.0872	26.1422	76.4424	26.7311	21.6121	18.71	21.4377	21.139	21.3251	88.1018
76.8601	21.0156	21.3628	18.21	20.9757	20.791	20.7911	75.9374	20.7286	20.8334	17.8292	20.6033	20.4578	20.4578	76.7436	23.1936	22.4734	22.194	22.5741	22.6056	22.6056	78.5006	24.1301	21.1898	18.8674	20.9815	20.8401	20.8401	84.6261	23.086	23.6505	18.3854	23.6275	23.34	23.3401	85.3525	33.4185	26.0001	23.0847	25.7591	25.5557	25.616	77.3313	26.1543	21.15	17.9043	21.0296	20.6736	20.8747	89.1263
77.7435	20.8833	20.8978	17.3911	20.5197	20.2931	20.2932	76.8103	22.0251	20.2526	16.9254	20.0478	19.8625	19.8625	77.6257	21.0668	21.6273	21.233	21.7359	21.7709	21.7709	79.403	22.8702	20.7583	18.1109	20.5577	20.3785	20.3785	85.5989	22.6209	23.0203	17.4486	23.0751	22.7385	22.7386	86.3335	35.8364	25.4972	22.1819	25.2843	25.0302	25.0957	78.2202	25.431	20.6915	17.1135	20.6284	20.215	20.4307	90.1507
78.6269	19.7078	20.4366	16.5883	20.0713	19.8026	19.8026	77.6831	21.5305	19.6795	16.0446	19.5037	19.2784	19.2784	78.5078	20.6575	20.7923	20.2834	20.9082	20.9462	20.9462	80.3053	22.2547	20.3295	17.3653	20.14	19.9225	19.9225	86.5716	21.4536	22.3989	16.5403	22.5344	22.1487	22.1488	87.3146	34.11	24.9972	21.2915	24.8163	24.5109	24.5815	79.109	23.7668	20.2367	16.3387	20.2342	19.7632	19.9932	91.1751
79.5104	18.9931	19.9791	15.8031	19.6306	19.3194	19.3195	78.5559	19.8236	19.1145	15.1881	18.9709	18.7055	18.7055	79.3899	20.4617	19.97	19.3475	20.0922	20.1331	20.1331	81.2076	20.1528	19.9039	16.6318	19.7284	19.4722	19.4722	87.5443	18.9931	21.7867	15.6613	22.0053	21.5706	21.5707	88.2957	30.6552	24.5003	20.4149	24.3551	23.9979	24.0735	79.9979	20.2596	19.7858	15.5809	19.8468	19.3184	19.5622	92.1996
80.3938	18.8079	19.5258	15.0363	19.1976	18.8439	18.8439	79.4288	18.6497	18.5576	14.3568	18.4495	18.1442	18.1442	80.272	20.5283	19.1615	18.4273	19.2894	19.3328	19.3329	82.1099	17.5736	19.4813	15.9115	19.323	19.0279	19.0279	88.517	19.0241	21.1836	14.812	21.4876	21.0043	21.0043	89.2767	25.276	24.0067	19.5534	23.9009	23.4915	23.572	80.8868	17.5958	19.3391	14.8411	19.4663	18.8806	19.1378	93.224
81.2773	18.5411	19.0767	14.2891	18.7723	18.376	18.3761	80.3016	17.8462	18.0092	13.5518	17.9396	17.5944	17.5944	81.1541	19.9598	18.368	17.5247	18.501	18.5466	18.5466	83.0122	17.5992	19.0622	15.2053	18.9238	18.5896	18.5896	89.4897	18.8251	20.59	13.9925	20.9812	20.4495	20.4496	90.2578	19.4622	23.5166	18.7081	23.4537	22.9918	23.077	81.7756	15.9343	18.8967	14.1201	19.0926	18.4499	18.72	94.2485
82.1607	18.033	18.632	13.5622	18.3548	17.916	17.9161	81.1745	16.6133	17.4695	12.7738	17.441	17.0563	17.0564	82.0362	17.1028	17.5906	16.6416	17.728	17.7755	17.7755	83.9145	16.0095	18.6466	14.5142	18.531	18.1575	18.1575	90.4624	19.2627	20.006	13.2032	20.486	19.9063	19.9063	91.2388	16.7776	23.0301	17.8801	23.0134	22.4989	22.5886	82.6645	15.0021	18.4588	13.4185	18.7257	18.0262	18.3088	95.2729
83.0442	16.9003	18.192	12.8563	17.9451	17.4638	17.4639	82.0473	15.5023	16.9387	12.0234	16.9538	16.53	16.53	82.9183	14.8874	16.8301	15.7795	16.9714	17.0204	17.0204	84.8168	15.1416	18.2348	13.8391	18.1446	17.7318	17.7318	91.4351	19.6013	19.4316	12.444	20.0017	19.3745	19.3746	92.2199	14.9664	22.5476	17.0704	22.5801	22.0128	22.107	83.5534	14.1602	18.0255	12.7371	18.3655	17.6097	17.9043	96.2973
83.9276	16.2867	17.7567	12.172	17.543	17.0196	17.0197	82.9202	14.0182	16.4169	11.3009	16.4778	16.0154	16.0154	83.8004	13.3487	16.0875	14.9397	16.232	16.2823	16.2823	85.7191	14.0935	17.8267	13.1806	17.7646	17.3125	17.3125	92.4079	18.7381	18.8671	11.715	19.5282	18.8542	18.8543	93.201	12.525	22.0691	16.2798	22.1537	21.5337	21.6323	84.4422	12.1629	17.597	12.0763	18.0119	17.2003	17.5066	97.3218
84.8111	14.4723	17.3264	11.5099	17.1486	16.5834	16.5835	83.793	10.8602	15.9044	10.6068	16.013	15.5126	15.5126	84.6826	12.3157	15.3634	14.1236	15.5106	15.5619	15.5619	86.6214	13.1289	17.4227	12.5393	17.3909	16.8997	16.8997	93.3806	16.6542	18.3125	11.016	19.0654	18.3452	18.3452	94.182	12.0132	21.5949	15.5092	21.7343	21.0617	21.1644	85.3311	11.2	17.1735	11.4365	17.6648	16.7981	17.1154	98.3462
85.6945	11.8534	16.9012	10.8704	16.7618	16.1552	16.1553	84.6659	9.0493	15.4012	9.94125	15.5593	15.0215	15.0215	85.5647	10.5842	14.6584	13.3323	14.8079	14.8598	14.8598	87.5237	11.2844	17.0229	11.916	17.0237	16.4935	16.4935	94.3533	13.0303	17.768	10.3467	18.6131	17.8473	17.8474	95.1631	10.8448	21.125	14.7591	21.3218	20.5968	20.7036	86.22	10.118	16.755	10.8181	17.3243	16.4029	16.731	99.3707
86.578	8.22247	16.4812	10.2536	16.3826	15.7351	15.7352	85.5387	7.26829	14.9076	9.30419	15.1166	14.5422	14.5422	86.4468	8.0572	13.973	12.5665	14.1243	14.1766	14.1767	88.426	8.57861	16.6274	11.3109	16.6628	16.094	16.094	95.326	8.66814	17.2335	9.70697	18.171	17.3605	17.3606	96.1442	8.02426	20.6597	14.0303	20.9163	20.1391	20.2497	87.1088	7.27435	16.3417	10.2213	16.9901	16.0149	16.3533	100.395
87.4614	5.12748	16.0665	9.65992	16.011	15.323	15.3231	86.4115	4.70598	14.4235	8.69559	14.6847	14.0746	14.0746	87.3289	5.56852	13.3076	11.8271	13.4604	13.5128	13.5128	89.3283	5.45721	16.2362	10.7246	16.3083	15.7012	15.7012	96.2987	5.19286	16.7092	9.09627	17.7391	16.8847	16.8848	97.1252	4.50623	20.1991	13.3231	20.5176	19.6886	19.803	87.9977	4.52774	15.9337	9.64624	16.6623	15.6341	15.9821	101.42
[truncated: 13 more columns]

## Sheet: WAT-325
spike_1							spike_2							spike_3							spike_4							spike_5							spike_6							spike_7							spike_8
Z-axis_1	Thickness-profile_1	skewed gaussian_1	gaussian_1	lognorm_1	gamma_1	chi2_1	Z-axis_2	Thickness-profile_2	skewed gaussian_2	gaussian_2	lognorm_2	gamma_2	chi2_2	Z-axis_3	Thickness-profile_3	skewed gaussian_3	gaussian_3	lognorm_3	gamma_3	chi2_3	Z-axis_4	Thickness-profile_4	skewed gaussian_4	gaussian_4	lognorm_4	gamma_4	chi2_4	Z-axis_5	Thickness-profile_5	skewed gaussian_5	gaussian_5	lognorm_5	gamma_5	chi2_5	Z-axis_6	Thickness-profile_6	skewed gaussian_6	gaussian_6	lognorm_6	gamma_6	chi2_6	Z-axis_7	Thickness-profile_7	skewed gaussian_7	gaussian_7	lognorm_7	gamma_7	chi2_7	Z-axis_8
0	3.13587	3.02775	12.345	2.00522	0	0	0	4.11207	0.693521	9.05302	0	0	0	0	1.97266	0.00110329	6.57402	0	0	0	0	1.58248	2.48925	10.4948	1.15858	0	0	0	1.99966	3.10035e-09	23.7203	0.393615	0	0	0	1.82116	0.0131499	5.67617	0	0	0	0	1.85749	0.137239	14.2296	0	0	0	0
1.12593	2.53535	3.72975	13.0209	2.8412	0	0	1.0485	2.27377	0.967391	9.48646	0	0	0	1.01632	2.35189	0.0025803	6.99335	0	0	0	1.11467	2.09292	3.06552	11.0642	1.79491	0	0	1.07985	4.15777	8.14268e-07	24.4856	2.51062	0	0	0.936924	2.23295	0.0238657	6.11737	0	0	0	1.09016	3.26173	0.288611	14.855	0	0	0	0.874935
2.25186	3.81992	4.54931	13.7188	3.84668	0	0	2.097	2.9715	1.32526	9.93141	0	0	0	2.03264	3.01038	0.00579735	7.43056	0	0	0	2.22935	2.93589	3.73905	11.6522	2.59872	0	0	2.1597	7.6094	9.60331e-05	25.2578	5.93186	0	0	1.87385	2.9378	0.0422068	6.58266	0	0	0	2.18032	5.29458	0.57162	15.4932	0	0	0	1.74987
3.3778	4.23397	5.49497	14.438	5.01576	0.524868	0.524843	3.1455	3.19185	1.78339	10.3876	0.000443208	0	0	3.04896	2.11154	0.0125153	7.88571	0	0	0	3.34402	2.8535	4.51733	12.2585	3.56657	0	0	3.23956	10.8176	0.00512723	26.0358	9.95661	5.73726	5.72994	2.81078	2.16383	0.0727452	7.07239	0	0	0	3.27048	3.46836	1.06712	16.1435	0	0	0	2.62481
4.50373	4.19027	6.5734	15.1783	6.33738	2.38858	2.38855	4.194	2.02134	2.35792	10.8545	0.103929	0	0	4.06528	2.48296	0.0259657	8.35877	0	0	0	4.4587	2.98297	5.4065	12.8827	4.6884	0	0	4.31941	8.9797	0.125501	26.8188	14.1406	14.1045	14.1029	3.7477	2.3854	0.122208	7.58681	0	0	0	4.36065	3.73013	1.87954	16.8051	0.148568	0	0	3.49975
5.62966	4.668	7.7889	15.9388	7.79654	4.59171	4.59169	5.2425	3.16823	3.06377	11.332	0.615492	0	0	5.0816	3.09193	0.0517848	8.84965	0	0	0	5.57338	3.51975	6.41084	13.5244	5.94928	0.854443	0.854443	5.39926	6.46044	1.43837	27.6057	18.2341	19.4887	19.4884	4.68463	2.73487	0.200144	8.12605	0	0	0	5.45081	3.22529	3.12693	17.4773	1.72696	0	0	4.37468
6.75559	4.91356	9.14288	16.7191	9.37544	6.93888	6.93886	6.291	4.02493	3.9133	11.8194	1.62521	0	0	6.09792	2.51839	0.0993026	9.35821	0	0	0	6.68805	3.89685	7.53243	14.1831	7.33097	3.39918	3.39918	6.47911	9.42486	8.01028	28.3956	22.1045	23.6894	23.6899	5.62156	1.83478	0.319598	8.69017	0	0	0	6.54097	3.32157	4.92044	18.1591	4.67166	0	0	5.24962
7.88152	4.60659	10.6335	17.5182	11.0546	9.34162	9.3416	7.3395	4.1882	4.91491	12.3163	3.04832	0	0	7.11425	3.32774	0.183149	9.8842	0	0	0	7.80273	4.19971	8.77075	14.8582	8.81335	5.97222	5.97222	7.55896	20.0127	23.1962	29.1873	25.6878	27.1653	27.1661	6.55848	2.90023	0.497707	9.27908	0	0	0	7.63113	4.46304	7.33525	18.8495	8.24965	2.97683	2.97451	6.12456
9.00745	5.26206	12.2552	18.3353	12.8136	11.7481	11.7481	8.388	3.97008	6.07176	12.8222	4.75822	0	0	8.13057	3.3254	0.324995	10.4273	0	0	0	8.9174	4.39743	10.1224	15.549	10.3755	8.48468	8.48468	8.63881	40.626	39.4496	29.9799	28.959	30.1256	30.1265	7.49541	3.09209	0.756037	9.89257	5.47262e-05	0	0	8.72129	4.9626	10.3798	19.5477	11.9806	12.127	12.1268	6.9995
10.1334	5.93109	13.999	19.1693	14.6322	14.1245	14.1245	9.4365	4.57005	7.38066	13.3365	6.63825	0	0	9.14689	3.21193	0.555067	10.9872	0	0	0	10.0321	5.26882	11.5809	16.2547	11.9968	10.906	10.906	9.71867	51.8838	47.5035	30.7722	31.9158	32.6895	32.6905	8.43233	2.73374	1.12052	10.5303	0.0179266	0	0	9.81145	9.93098	13.9741	20.2525	15.6022	17.0353	17.0354	7.87443
11.2593	7.39335	15.8518	20.0191	16.4905	16.4479	16.4479	10.485	3.59257	8.83135	13.8584	8.59538	0	0	10.1632	4.04253	0.912843	11.5633	0	0	0	11.1468	5.39437	13.1369	16.9745	13.6573	13.2221	13.2221	10.7985	54.2408	49.3328	31.563	34.5684	34.9333	34.9343	9.36926	3.67019	1.62077	11.1919	0.181119	0	0	10.9016	22.5395	17.9471	20.9628	18.9828	20.6857	20.6859	8.74937
12.3852	15.8041	17.7973	20.8836	18.3696	18.7019	18.7019	11.5335	5.05568	10.4063	14.3874	10.5603	4.85899	4.85898	11.1795	4.42401	1.44626	12.1552	0	0	0	12.2614	7.8457	14.7778	17.7076	15.3383	15.4263	15.4263	11.8784	40.9005	49.5002	32.3512	36.9333	36.9106	36.9116	10.3062	3.58336	2.28863	11.8765	0.682099	0	0	11.9918	31.3408	22.0586	21.6774	22.0639	23.6126	23.6128	9.62431
13.5112	26.5521	19.8159	21.7613	20.252	20.875	20.875	12.582	7.76973	12.0812	14.9227	12.4838	11.3513	11.3513	12.1959	4.55869	2.20872	12.7621	0	0	0	13.3761	13.9413	16.4884	18.4527	17.0227	17.5158	17.5158	12.9582	29.4227	49.4744	33.1356	39.0306	38.6604	38.6614	11.2431	3.74973	3.15597	12.5836	1.63914	0	0	13.0819	31.159	26.0413	22.3951	24.8279	26.0421	26.0423	10.4992
14.6371	32.3326	21.8854	22.651	22.1217	22.959	22.959	13.6305	12.555	13.8257	15.4635	14.332	14.8506	14.8506	13.2122	4.98659	3.2536	13.3834	0.0132939	0	0	14.4908	22.9263	18.2512	19.209	18.6951	19.49	19.49	14.0381	25.3998	49.4314	33.9149	40.8812	40.213	40.2139	12.18	4.54665	4.25164	13.3122	3.06756	0	0	14.1721	28.5856	29.6513	23.1147	27.2792	28.098	28.0982	11.3742
15.763	33.1334	23.9817	23.551	23.9641	24.9483	24.9483	14.679	19.6562	15.6054	16.009	16.083	17.3936	17.3936	14.2285	5.508	4.6264	14.0182	1.1341	0	0	15.6054	30.126	20.0467	19.9751	20.342	21.3499	21.3499	15.1179	45.456	49.3803	34.6879	42.506	41.5923	41.5931	13.117	4.51622	5.59796	14.0612	4.91095	1.06263	1.06188	15.2622	27.9158	32.7116	23.8347	29.4336	29.8577	29.858	12.2491
16.889	33.9101	26.0796	24.4598	25.7665	26.8392	26.8392	15.7275	24.2716	17.3834	16.5584	17.7235	19.3989	19.3989	15.2448	6.139	6.35554	14.6656	3.89868	0	2.68921	16.7201	37.7314	21.8542	20.7499	21.9516	23.0973	23.0973	16.1978	60.8884	49.3213	35.4534	43.9249	42.8177	42.8184	14.0539	4.45092	7.20707	14.8294	7.07755	5.14451	5.14414	16.3524	24.5107	35.1354	24.5538	31.3126	31.3745	31.3747	13.1241
18.0149	34.0724	28.1534	25.3757	27.5178	28.6295	28.6295	16.776	26.9046	19.1229	17.1106	19.2465	21.0433	21.0433	16.2611	5.7998	8.4435	15.3247	7.38714	0	9.06319	17.8348	41.8305	23.6525	21.532	23.5138	24.7346	24.7346	17.2776	65.5263	49.2544	36.2102	45.1569	43.9052	43.9058	14.9908	5.77519	9.07763	15.6153	9.46612	8.82312	8.82295	17.4426	31.6742	36.9252	25.2706	32.9394	32.6866	32.6868	13.999
19.1408	33.297	30.1783	26.2968	29.2086	30.3182	30.3182	17.8245	28.3858	20.789	17.6648	20.6496	22.4221	22.4221	17.2775	7.49503	10.8605	15.9943	11.0055	6.25497	13.1471	18.9495	37.4461	25.4204	22.3199	25.0202	26.265	26.265	18.3575	57.9838	49.1796	36.9568	46.2194	44.8685	44.8691	15.9277	9.46329	11.1925	16.4175	11.9809	12.1644	12.1644	18.5327	46.7109	38.1525	25.9837	34.3377	33.8235	33.8237	14.8739
20.2668	38.3261	32.1307	27.2213	30.8309	31.9051	31.9052	18.873	27.4907	22.3511	18.22	21.9332	23.5942	23.5942	18.2938	11.4687	13.5424	16.6733	14.4619	14.4358	16.3449	20.0642	31.6801	27.1377	23.1123	26.464	27.6915	27.6915	19.4373	39.4583	49.0971	37.6921	47.1286	45.7193	45.7198	16.8647	14.9312	13.518	17.2342	14.5387	15.202	15.202	19.6229	50.9671	38.9268	26.6916	35.53	34.8081	34.8082	15.7489
21.3927	44.4398	33.9895	28.1472	32.3782	33.391	33.391	19.9215	24.9461	23.7844	18.7752	23.1004	24.5992	24.5992	19.3101	15.4903	16.3949	17.3604	17.6272	18.7071	18.9886	21.1788	29.1176	28.7856	23.9076	27.8396	29.0175	29.0175	20.5172	24.4625	49.0068	38.4148	47.8992	46.4676	46.468	17.8016	18.8937	16.0046	18.0635	17.0716	17.9612	17.9613	20.7131	44.298	39.3665	27.3927	36.5376	35.6588	35.6589	16.6238
22.5186	41.2666	35.736	29.0726	33.8454	34.7769	34.7769	20.97	22.3685	25.0708	19.3293	24.1553	25.4653	25.4653	20.3264	19.6173	19.3025	18.0543	20.4556	21.7464	21.2307	22.2935	28.5365	30.3473	24.7042	29.143	30.2466	30.2466	21.597	25.3897	48.9088	39.1236	48.5446	47.1222	47.1225	18.7385	20.7794	18.5898	18.9035	19.5266	20.4631	20.4633	21.8032	35.4633	39.5776	28.0856	37.3799	36.391	36.3911	17.4987
23.6446	39.3625	37.3551	29.9952	35.2286	36.0646	36.0646	22.0185	21.629	26.1993	19.8813	25.1032	26.2138	26.2138	21.3427	24.0435	22.1426	18.7535	22.9431	24.0959	23.1589	23.4082	29.2377	31.8085	25.5003	30.3711	31.3824	31.3824	22.6769	33.3862	48.803	39.8172	49.077	47.691	47.6912	19.6754	21.5549	21.2028	19.7519	21.8642	22.7265	22.7267	22.8934	26.6244	39.6428	28.7687	38.0747	37.0174	37.0175	18.3737
24.7705	33.5707	38.8353	30.913	36.525	37.2562	37.2562	23.067	23.2606	27.1663	20.4299	25.9499	26.8611	26.8611	22.3591	27.8443	24.8	19.4567	25.1057	25.9839	24.8307	24.5229	31.22	33.1579	26.2944	31.5218	32.4284	32.4284	23.7567	46.8346	48.6897	40.4944	49.5075	48.1808	48.181	20.6124	23.4137	23.7698	20.6065	24.0564	24.7682	24.7684	23.9835	26.8359	39.62	29.4405	38.6379	37.5489	37.5489	19.2486
25.8964	32.2137	40.1689	31.8238	37.7329	38.3538	38.3538	24.1155	24.2801	27.9745	20.9742	26.7013	27.4201	27.4201	23.3754	29.4374	27.1809	20.1621	26.9686	27.5335	26.2869	25.6375	32.4987	34.3872	27.0845	32.5939	33.3882	33.3882	24.8366	61.4146	48.5688	41.154	49.846	48.5979	48.598	21.5493	24.8617	26.2198	21.4649	26.085	26.6036	26.6038	25.0737	29.3527	39.5459	30.0993	39.0841	37.9948	37.9948	20.1236
27.0224	32.4656	41.3517	32.7253	38.8512	39.3602	39.3602	25.164	25.5599	28.6319	21.513	27.3636	27.9014	27.9014	24.3917	29.8753	29.2218	20.8683	28.5599	28.8207	27.558	26.7522	32.7246	35.491	27.869	33.587	34.2655	34.2655	25.9164	65.3634	48.4403	41.7946	50.1016	48.9478	48.9478	22.4862	25.9682	28.4908	22.3244	27.9393	28.2471	28.2472	26.1639	38.6384	39.4418	30.7437	39.4261	38.3632	38.3632	20.9985
28.1483	35.2389	42.3832	33.6152	39.8798	40.2781	40.2781	26.2125	26.6697	29.1506	22.0451	27.9429	28.3139	28.3139	25.408	28.3325	30.8938	21.5735	29.9082	29.8968	28.6676	27.8669	29.6242	36.4672	28.6459	34.5015	35.0636	35.0636	26.9963	62.9426	48.3044	42.4151	50.2824	49.2355	49.2354	23.4232	28.0366	30.5335	23.1824	29.6147	29.7117	29.7119	27.254	49.677	39.319	31.3721	39.6756	38.6614	38.6614	21.8734
29.2742	39.3379	43.266	34.4912	40.8193	41.1102	41.1102	27.261	26.8869	29.5455	22.5693	28.4449	28.6649	28.6649	26.4243	28.9196	32.1998	22.2759	31.0402	30.7984	29.6349	28.9816	27.711	37.3162	29.4134	35.3382	35.7861	35.7861	28.0761	54.2445	48.1612	43.0143	50.396	49.4657	49.4656	24.3601	34.5073	32.3143	24.0362	31.111	31.0099	31.0101	28.3442	53.2036	39.1832	31.983	39.8429	38.8956	38.8955	22.7484
30.4002	42.552	44.0054	35.351	41.6707	41.8597	41.8597	28.3095	26.0321	29.8327	23.0845	28.8755	28.9607	28.9607	27.4407	27.3923	33.1688	22.9738	31.9808	31.553	30.4756	30.0962	26.9608	38.041	30.1697	36.0983	36.4363	36.4363	29.156	38.8849	48.0106	43.591	50.4489	49.6425	49.6423	25.297	37.0224	33.8166	24.8829	32.4317	32.1532	32.1533	29.4343	46.903	39.037	32.5748	39.9372	39.0713	39.0713	23.6233
31.5261	41.1602	44.6088	36.1923	42.4357	42.5295	42.5295	29.358	24.1728	30.0284	23.5894	29.2399	29.2066	29.2066	28.457	31.1393	33.8467	23.6654	32.7526	32.1818	31.2031	31.2109	29.2442	38.6467	30.9127	36.7835	37.0176	37.0176	30.2358	34.3558	47.8527	44.1441	50.4473	49.7697	49.7695	26.2339	36.3523	35.0392	25.7196	33.5828	33.1522	33.1523	30.5245	36.7894	38.8815	33.1462	39.9668	39.1938	39.1937	24.4982
32.652	37.3383	45.0856	37.0128	43.1162	43.1226	43.1226	30.4065	25.2732	30.1484	24.0831	29.5433	29.4074	29.4074	29.4733	40.5879	34.2868	24.3487	33.3756	32.7017	31.8286	32.3256	30.1305	39.1401	31.6405	37.3959	37.533	37.533	31.3157	36.4485	47.6877	44.6726	50.3965	49.8509	49.8507	27.1709	36.6121	35.9948	26.5433	34.5719	34.0171	34.0172	31.6147	28.17	38.7173	33.6955	39.9391	39.2674	39.2673	25.3732
33.7779	40.4981	45.4461	37.8102	43.7147	43.6422	43.6422	31.455	29.2298	30.2068	24.5641	29.7905	29.5673	29.5673	30.4896	44.9163	34.5427	25.022	33.8678	33.1264	32.3618	33.4403	32.8899	39.5292	32.3514	37.9377	37.9857	37.9857	32.3956	39.3802	47.5156	45.1754	50.3016	49.8893	49.8891	28.1078	35.4755	36.7058	27.3511	35.4077	34.7574	34.7574	32.7048	25.8957	38.5447	34.2215	39.8607	39.2963	39.2962	26.2481
34.9039	44.8661	45.7012	38.5821	44.2336	44.0913	44.0913	32.5035	31.577	30.216	25.0315	29.986	29.6898	29.6898	31.5059	44.6509	34.6621	25.6832	34.245	33.4674	32.8113	34.5549	42.0798	39.8228	33.0433	38.4114	38.3789	38.3789	33.4754	50.1136	47.3364	45.6514	50.1671	49.888	49.8876	29.0447	38.0866	37.2013	28.1398	36.0998	35.3818	35.3818	33.795	28.2601	38.3637	34.7227	39.7374	39.2841	39.284	27.123
36.0298	44.8889	45.8622	39.3264	44.6759	44.473	44.473	33.552	32.3574	30.1866	25.484	30.134	29.7781	29.7781	32.5223	38.9907	34.6846	26.3305	34.5212	33.7342	33.1846	35.6696	47.8228	40.0302	33.7144	38.8195	38.7153	38.7153	34.5553	57.5568	47.1503	46.0997	49.9969	49.8496	49.8492	29.9816	35.6447	37.5136	28.9065	36.658	35.8987	35.8987	34.8851	32.0714	38.1746	35.1978	39.5746	39.2343	39.2342	27.998
37.1557	43.3154	45.94	40.0408	45.0445	44.7902	44.7902	34.6005	32.823	30.1272	25.9206	30.2385	29.8353	29.8353	33.5386	35.9346	34.6402	26.962	34.7089	33.935	33.4884	36.7843	48.2388	40.1607	34.3628	39.1649	38.9978	38.9978	35.6351	60.1507	46.9574	46.5195	49.7948	49.7767	49.7763	30.9186	35.7544	37.6746	29.6482	37.0922	36.3159	36.3159	35.9753	35.9187	37.9774	35.6455	39.3768	39.1498	39.1497	28.8729
38.2817	42.4187	45.9452	40.7233	45.3427	45.046	45.046	35.649	32.4472	30.0445	26.3402	30.3032	29.8638	29.8638	34.5549	34.9002	34.5505	27.5757	34.8188	34.0767	33.7287	37.899	43.6114	40.2233	34.9868	39.4503	39.2291	39.2291	36.715	55.5294	46.7577	46.9098	49.5641	49.6718	49.6713	31.8555	37.0481	37.7142	30.3619	37.4122	36.6408	36.6408	37.0655	40.9314	37.7724	36.0647	39.1484	39.0336	39.0335	29.7479
39.4076	43.3175	45.8875	41.3717	45.5735	45.2433	45.2433	36.6975	33.3631	29.9437	26.7416	30.3315	29.866	29.866	35.5712	34.7173	34.4302	28.1699	34.8606	34.1654	33.9108	39.0136	39.5669	40.2268	35.5845	39.6785	39.412	39.412	37.7948	47.7767	46.5514	47.2698	49.3079	49.537	49.5365	32.7924	38.7196	37.6585	31.0447	37.6276	36.8801	36.8801	38.1556	44.2154	37.5596	36.4543	38.893	38.8883	38.8882	30.6228
40.5335	42.6817	45.7758	41.9841	45.7402	45.385	45.385	37.746	28.9815	29.8288	27.1239	30.3264	29.8441	29.8441	36.5875	32.554	34.2886	28.7425	34.8428	34.2065	34.0396	40.1283	40.8568	40.179	36.1542	39.8525	39.5489	39.5489	38.8747	43.9208	46.3385	47.5988	49.0289	49.3744	49.3739	33.7293	43.8278	37.5293	31.6938	37.7475	37.0404	37.0404	39.2458	40.3507	37.3393	36.813	38.6141	38.7161	38.716	31.4977
41.6595	38.9567	45.6181	42.5586	45.8461	45.4739	45.4739	38.7945	27.7459	29.7026	27.486	30.291	29.7999	29.7999	37.6039	32.3193	34.1315	29.2919	34.7729	34.2047	34.1195	41.243	40.9723	40.0873	36.6942	39.9751	39.6423	39.6423	39.9545	45.1607	46.1191	47.8961	48.7296	49.186	49.1855	34.6663	39.6022	37.3441	32.3064	37.7806	37.1277	37.1277	40.3359	36.7464	37.1114	37.1401	38.3146	38.5194	38.5193	32.3727
42.7854	37.2746	45.4212	43.0933	45.8946	45.5127	45.5127	39.843	27.1422	29.5671	27.8271	30.2279	29.7353	29.7353	38.6202	32.9318	33.9622	29.8162	34.6574	34.1641	34.1546	42.3577	39.7184	39.958	37.2031	40.049	39.6946	39.6946	41.0344	44.76	45.8934	48.1612	48.4123	48.9736	48.9731	35.6032	37.4415	37.1161	32.88	37.7351	37.1477	37.1477	41.4261	32.3861	36.8763	37.4345	37.9973	38.3001	38.3	33.2476
43.9113	38.902	45.1912	43.5867	45.8887	45.504	45.504	40.8915	29.8127	29.4239	28.1463	30.1396	29.6518	29.6518	39.6365	34.4904	33.7825	30.3137	34.5021	34.0884	34.1484	43.4723	40.4869	39.7968	37.6792	40.0771	39.708	39.708	42.1142	46.0288	45.6614	48.3933	48.079	48.7388	48.7383	36.5401	36.5461	36.8553	33.4119	37.6189	37.1058	37.1057	42.5163	30.6641	36.634	37.6954	37.6645	38.0601	38.06	34.1225
45.0373	42.3134	44.9331	44.0371	45.8318	45.4505	45.4505	41.94	30.4929	29.2739	28.4426	30.0284	29.551	29.551	40.6528	32.9134	33.5935	30.7829	34.3122	33.9809	34.1044	44.587	37.4764	39.6086	38.1211	40.062	39.6848	39.6848	43.1941	47.0903	45.4232	48.5921	47.7316	48.4833	48.4828	37.477	35.0588	36.5686	33.9	37.4391	37.0069	37.0069	43.6064	32.4757	36.3847	37.9221	37.3185	37.8012	37.8011	34.9975
46.1632	43.9405	44.6511	44.4432	45.7269	45.3548	45.3548	42.9885	30.9002	29.1178	28.7152	29.8966	29.4341	29.4341	41.6692	30.498	33.3958	31.222	34.0923	33.8447	34.0256	45.7017	33.3486	39.3975	38.5275	40.0065	39.6271	39.6271	44.2739	50.0936	45.179	48.7572	47.3718	48.2085	48.208	38.414	35.3036	36.2611	34.3421	37.2025	36.8558	36.8557	44.6966	33.7088	36.1286	38.1141	36.9612	37.525	37.5249	35.8724
47.2891	43.5658	44.3486	44.8035	45.5771	45.2191	45.2191	44.037	30.8952	28.9561	28.9636	29.7459	29.3025	29.3025	42.6855	29.4284	33.1898	31.6297	33.8463	33.6824	33.9149	46.8164	31.5244	39.1667	38.8972	39.9132	39.5368	39.5368	45.3538	51.5633	44.9289	48.8881	47.0012	47.9159	47.9154	39.3509	34.5481	35.936	34.7361	36.9153	36.6569	36.6568	45.7867	34.0949	35.8659	38.2706	36.5943	37.233	37.2329	36.7474
48.4151	44.8523	44.0286	45.1169	45.3854	45.0459	45.0459	45.0855	30.3888	28.789	29.1869	29.5784	29.1573	29.1573	43.7018	26.9954	32.9757	32.0046	33.5778	33.4964	33.7748	47.931	32.4205	38.9193	39.2289	39.7844	39.4159	39.4159	46.4336	46.8053	44.6729	48.9846	46.6212	47.6067	47.6062	40.2878	32.8038	35.5957	35.0802	36.5834	36.4142	36.4141	46.8769	34.5911	35.5967	38.3913	36.2194	36.9265	36.9264	37.6223
49.541	48.9338	43.6932	45.3824	45.1547	44.8375	44.8375	46.134	31.2664	28.6169	29.3845	29.3955	28.9995	28.9995	44.7181	24.7076	32.7537	32.3454	33.29	33.2891	33.6079	49.0457	33.7514	38.6575	39.5218	39.6226	39.2663	39.2663	47.5135	41.8496	44.4112	49.0465	46.2331	47.2823	47.2818	41.2248	32.3742	35.2417	35.3731	36.2119	36.1317	36.1316	47.9671	35.6269	35.3211	38.4759	35.8378	36.6069	36.6068	38.4972
50.6669	46.0094	43.3444	45.5991	44.8878	44.5961	44.5961	47.1825	29.109	28.4399	29.556	29.1989	28.8302	28.8302	45.7344	23.0363	32.5241	32.6508	32.9856	33.0623	33.4164	50.1604	35.1453	38.383	39.7748	39.4302	39.0897	39.0897	48.5933	39.1527	44.144	49.0737	45.8379	46.9436	46.9432	42.1617	32.4567	34.8753	35.6132	35.8058	35.813	35.8129	49.0572	35.5795	35.0395	38.5241	35.451	36.2754	36.2753	39.3722
51.7929	43.1168	42.9836	45.7664	44.5873	44.3237	44.3237	48.231	27.2555	28.2582	29.7008	28.99	28.6503	28.6503	46.7508	21.1017	32.287	32.9199	32.6672	32.818	33.2024	51.2751	33.6581	38.0975	39.9872	39.2093	38.8879	38.8879	49.6732	39.4242	43.8712	49.0661	45.4369	46.592	46.5915	43.0986	33.7171	34.4971	35.7995	35.3697	35.4615	35.4614	50.1474	34.1652	34.7519	38.5357	35.0599	35.9331	35.933	40.2471
52.9188	40.8014	42.612	45.8836	44.2558	44.0224	44.0224	49.2795	26.3378	28.0719	29.8186	28.77	28.4606	28.4606	47.7671	21.5484	32.0426	33.1517	32.3369	32.5579	32.9677	52.3897	32.5067	37.8021	40.1583	38.9622	38.6625	38.6625	50.753	41.1247	43.5931	49.0237	45.0309	46.2283	46.2278	44.0355	32.7653	34.1079	35.9311	34.9074	35.0803	35.0802	51.2376	33.759	34.4585	38.5108	34.6657	35.5811	35.581	41.122
54.0447	44.2068	42.2305	45.9504	43.8958	43.6942	43.6942	50.328	26.0046	27.8811	29.909	28.5402	28.262	28.262	48.7834	25.0337	31.7911	33.3453	31.9967	32.2834	32.7141	53.5044	32.5135	37.4977	40.2876	38.6907	38.415	38.415	51.8329	43.1084	43.3098	48.9467	44.6209	45.8536	45.8531	44.9725	30.9286	33.7082	36.0074	34.4229	34.6724	34.6723	52.3277	36.3481	34.1595	38.4494	34.2691	35.2204	35.2203	41.997
55.1706	45.4986	41.8398	45.9665	43.5097	43.341	43.341	51.3765	27.8583	27.686	29.9717	28.3018	28.0551	28.0551	49.7997	29.0454	31.5327	33.5002	31.6483	31.996	32.4435	54.6191	35.292	37.1851	40.3747	38.397	38.147	38.147	52.9127	43.8139	43.0214	48.8351	44.2076	45.4687	45.4683	45.9094	31.2572	33.2987	36.0281	33.9194	34.2407	34.2406	53.4179	39.7654	33.8552	38.3517	33.871	34.8518	34.8517	42.8719
56.2966	42.4722	41.4407	45.932	43.0998	42.9646	42.9646	52.425	27.9545	27.4866	30.0067	28.0556	27.8408	27.8408	50.816	31.4608	31.2676	33.6156	31.2933	31.6971	32.1572	55.7338	36.9702	36.865	40.4193	38.0827	37.8599	37.8599	53.9926	42.3013	42.728	48.6892	43.7918	45.0746	45.0742	46.8463	30.6456	32.8797	35.9931	33.4001	33.7877	33.7876	54.508	39.152	33.5457	38.2179	33.4722	34.4762	34.4761	43.7469
57.4225	41.3429	41.0337	45.8469	42.668	42.5666	42.5666	53.4735	27.7951	27.2831	30.0137	27.8027	27.6195	27.6195	51.8324	32.3526	30.9961	33.6913	30.933	31.3878	31.8567	56.8484	38.0678	36.5378	40.4212	37.7498	37.5551	37.5551	55.0724	44.2345	42.4298	48.5093	43.3741	44.6721	44.6717	47.7832	31.3408	32.4518	35.9025	32.8677	33.3158	33.3157	55.5982	36.7689	33.2311	38.0485	33.0733	34.0945	34.0944	44.6218
58.5484	43.5741	40.6192	45.7114	42.2166	42.1489	42.1488	54.522	26.3986	27.0755	29.9929	27.5439	27.392	27.392	52.8487	32.705	30.7182	33.727	30.5686	31.0692	31.5435	57.9631	37.098	36.204	40.3804	37.3998	37.2338	37.2338	56.1523	42.7909	42.1268	48.2959	42.9552	44.2619	44.2615	48.7202	29.4024	32.0155	35.7568	32.3249	32.8273	32.8272	56.6884	35.8466	32.9118	37.8438	32.6748	33.7073	33.7072	45.4967
59.6744	47.198	40.1977	45.5262	41.7475	41.7128	41.7128	55.5705	26.4397	26.8641	29.9441	27.2801	27.1588	27.1588	53.865	35.199	30.4343	33.7224	30.2013	30.7424	31.2187	59.0778	39.137	35.864	40.2972	37.0344	36.8973	36.8973	57.2321	40.7066	41.8193	48.0493	42.5356	43.8447	43.8443	49.6571	29.7751	31.5713	35.5566	31.7739	32.3243	32.3242	57.7785	34.6268	32.5878	37.6046	32.2773	33.3154	33.3153	46.3717
60.8003	44.8173	39.7695	45.2916	41.2624	41.2601	41.2601	56.619	27.6894	26.6489	29.8677	27.0118	26.9204	26.9204	54.8813	34.4899	30.1445	33.6777	29.8319	30.4083	30.8834	60.1925	39.1717	35.518	40.1717	36.655	36.5468	36.5468	58.312	40.4845	41.5073	47.77	42.1158	43.4213	43.4209	50.594	30.364	31.1197	35.3028	31.2168	31.8087	31.8087	58.8687	34.2528	32.2594	37.3314	31.8813	32.9195	32.9194	47.2466
61.9262	41.8473	39.335	45.0086	40.7631	40.7921	40.7921	57.6675	27.0727	26.43	29.7637	26.7399	26.6774	26.6774	55.8976	32.1773	29.849	33.5931	29.4613	30.0677	30.5389	61.3071	38.3856	35.1665	40.0043	36.263	36.1835	36.1835	59.3918	43.3217	41.191	47.4588	41.6962	42.9922	42.9919	51.5309	31.2017	30.6611	34.9966	30.6553	31.2825	31.2824	59.9588	31.9293	31.9268	37.0251	31.4871	32.5201	32.52	48.1215
63.0522	39.9821	38.8945	44.6781	40.2513	40.3102	40.3102	58.716	27.2778	26.2076	29.6324	26.4648	26.4301	26.4301	56.914	31.1004	29.5482	33.4687	29.0903	29.7216	30.1861	62.4218	36.7127	34.8095	39.7955	35.8599	35.8083	35.8083	60.4717	47.1194	40.8705	47.1161	41.2772	42.5582	42.5579	52.4679	32.5507	30.1961	34.6395	30.0913	30.7472	30.7471	61.049	32.0416	31.5902	36.6864	31.0951	32.1178	32.1177	48.9965
64.1781	38.3313	38.4485	44.301	39.7285	39.8158	39.8158	59.7645	27.9308	25.9818	29.4744	26.1873	26.1791	26.179	57.9303	31.0124	29.2422	33.305	28.7195	29.3706	29.826	63.5365	36.707	34.4475	39.5461	35.4467	35.4224	35.4224	61.5515	45.8857	40.546	46.7427	40.8593	42.1197	42.1194	53.4048	29.4949	29.7252	34.233	29.5262	30.2045	30.2044	62.1392	33.6912	31.2498	36.3164	30.7057	31.7131	31.7131	49.8714
65.304	40.4779	37.9971	43.8787	39.1961	39.31	39.31	60.813	29.5546	25.7526	29.2898	25.9077	25.9246	25.9246	58.9466	29.0983	28.9312	33.1027	28.3495	29.0155	29.4595	64.6512	37.7339	34.0807	39.2568	35.0249	35.0268	35.0268	62.6314	43.2495	40.2176	46.3394	40.4427	41.6774	41.6771	54.3417	29.2687	29.2488	33.7789	28.9614	29.6558	29.6558	63.2293	36.8037	30.9057	35.9159	30.3191	31.3066	31.3066	50.7463
66.43	38.3327	37.5408	43.4125	38.6556	38.7942	38.7942	61.8615	30.5504	25.5203	29.0794	25.6267	25.6672	25.6672	59.9629	29.096	28.6154	32.8625	27.9808	28.6568	29.0873	65.7658	38.7349	33.7093	38.9285	34.5953	34.6223	34.6223	63.7113	40.6503	39.8853	45.9071	40.0278	41.2316	41.2314	55.2786	28.7596	28.7675	33.2793	28.398	29.1026	29.1025	64.3195	37.7077	30.5583	35.4862	29.9356	30.8988	30.8987	51.6213
67.5559	37.7877	37.0797	42.904	38.1081	38.2694	38.2694	62.91	28.2825	25.2849	28.8436	25.3445	25.4072	25.4072	60.9792	30.0155	28.2951	32.5851	27.614	28.2953	28.7103	66.8805	37.6151	33.3336	38.5622	34.1592	34.2098	34.2098	64.7911	38.0783	39.5495	45.4465	39.6149	40.7831	40.7828	56.2156	29.9839	28.2818	32.7365	27.8371	28.546	28.5459	65.4096	36.6157	30.2076	35.0284	29.5553	30.49	30.4899	52.4962
68.6818	37.5519	36.6143	42.3546	37.5549	37.7367	37.7367	63.9585	27.2142	25.0466	28.5832	25.0616	25.1449	25.1449	61.9956	29.6933	27.9706	32.2716	27.2493	27.9314	28.3292	67.9952	36.3355	32.9538	38.159	33.7174	33.7903	33.7903	65.8709	35.3401	39.2101	44.9587	39.2041	40.3321	40.3319	57.1525	30.2822	27.7922	32.1526	27.2797	27.9872	27.9871	66.4998	35.8659	29.8539	34.5437	29.1786	30.0807	30.0806	53.3712
69.8078	41.3518	36.1449	41.7661	36.9972	37.1972	37.1972	65.007	24.5008	24.8055	28.2987	24.7784	24.8807	24.8806	63.0119	30.3355	27.642	31.923	26.8871	27.5656	27.9447	69.1099	35.1962	32.5701	37.7202	33.2709	33.3644	33.3644	66.9508	36.1921	38.8674	44.4445	38.7958	39.8791	39.8789	58.0894	28.5609	27.2991	31.5304	26.7265	27.4272	27.4272	67.59	34.307	29.4974	34.0333	28.8055	29.6712	29.6712	54.2461
70.9337	40.1741	35.6717	41.1404	36.4359	36.6518	36.6518	66.0555	24.1251	24.5617	27.991	24.4952	24.6147	24.6147	64.0282	30.0886	27.3095	31.5406	26.5277	27.1985	27.5574	70.2245	36.6539	32.1829	37.2471	32.8205	32.933	32.933	68.0307	38.95	38.5214	43.9051	38.39	39.4245	39.4244	59.0264	29.1633	26.803	30.8724	26.1784	26.8672	26.8672	68.6801	30.9597	29.1383	33.4987	28.4363	29.2619	29.2619	55.121
72.0596	40.6579	35.1951	40.4794	35.872	36.1015	36.1015	67.104	21.5648	24.3153	27.6609	24.2123	24.3474	24.3474	65.0445	29.3538	26.9735	31.1257	26.1715	26.8304	27.1678	71.3392	36.4376	31.7922	36.7412	32.3671	32.4967	32.4967	69.1105	42.224	38.1724	43.3415	37.9871	38.9688	38.9687	59.9633	28.4242	26.3045	30.1814	25.636	26.308	26.308	69.7703	30.0576	28.7767	32.9412	28.0709	28.8532	28.8532	55.996
73.1856	40.606	34.7154	39.7851	35.3065	35.5471	35.5471	68.1525	20.6378	24.0665	27.3092	23.93	24.0789	24.0789	66.0609	29.5842	26.6341	30.6796	25.8186	26.4619	26.7766	72.4539	34.1819	31.3984	36.2038	31.9114	32.0563	32.0563	70.1904	43.0947	37.8205	42.7549	37.5871	38.5123	38.5122	60.9002	28.5471	25.804	29.4602	25.0998	25.7505	25.7504	70.8604	29.7629	28.413	32.3623	27.7096	28.4453	28.4453	56.8709
74.3115	40.5194	34.2328	39.0596	34.7402	34.9895	34.9895	69.201	19.9145	23.8154	26.937	23.6485	23.8096	23.8096	67.0772	27.2261	26.2916	30.2039	25.4693	26.0932	26.3842	73.5686	32.1126	31.0018	35.6367	31.454	31.6125	31.6125	71.2702	43.6861	37.4657	42.1462	37.1901	38.0553	38.0552	61.8371	25.7868	25.302	28.7118	24.5703	25.1953	25.1953	71.9506	30.5208	28.0472	31.7634	27.3524	28.0386	28.0386	57.7458
75.4374	40.9704	33.7477	38.305	34.1739	34.4295	34.4295	70.2495	19.6628	23.5621	26.5451	23.3681	23.5396	23.5396	68.0935	26.7871	25.9462	29.7002	25.1236	25.7248	25.9912	74.6832	31.8834	30.6024	35.0415	30.9957	31.1657	31.1657	72.3501	42.4598	37.1083	41.5168	36.7965	37.5981	37.598	62.7741	25.7059	24.7989	27.9391	24.0479	24.6433	24.6432	73.0408	28.5299	27.6796	31.146	26.9994	27.6333	27.6333	58.6208
76.5634	37.7031	33.2604	37.5236	33.6082	33.8677	33.8677	71.298	21.2575	23.3067	26.1345	23.089	23.2692	23.2692	69.1098	25.8877	25.5982	29.1701	24.7818	25.3569	25.5979	75.7979	31.2962	30.2006	34.4198	30.537	30.7166	30.7166	73.4299	42.5112	36.7483	40.8677	36.4061	37.1411	37.1411	63.711	26.698	24.2952	27.1452	23.5331	24.095	24.095	74.1309	26.1447	27.3104	30.5116	26.6507	27.2296	27.2296	59.4957
77.6893	37.5265	32.7711	36.7176	33.044	33.3049	33.3049	72.3465	22.317	23.0494	25.7064	22.8113	22.9986	22.9986	70.1261	27.3253	25.2477	28.6153	24.444	24.9898	25.2048	76.9126	31.2682	29.7966	33.7735	30.0785	30.2658	30.2658	74.5098	40.2205	36.386	40.2003	36.0192	36.6845	36.6845	64.6479	26.1998	23.7913	26.333	23.026	23.5511	23.5511	75.2211	24.515	26.9398	29.8617	26.3063	26.8279	26.8279	60.3707
78.8152	35.8503	32.2802	35.8893	32.4817	32.7417	32.7417	73.395	21.972	22.7903	25.2618	22.5353	22.728	22.728	71.1425	28.2918	24.895	28.0377	24.1102	24.6239	24.8122	78.0273	31.9494	29.3907	33.1043	29.6208	29.8138	29.8138	75.5896	40.0997	36.0215	39.5158	35.6357	36.2287	36.2287	65.5848	25.9038	23.2877	25.5057	22.527	23.0121	23.0121	76.3113	23.8676	26.5679	29.198	25.9662	26.4282	26.4282	61.2456
79.9411	37.0589	31.788	35.041	31.9221	32.1789	32.1789	74.4435	20.7428	22.5295	24.8018	22.261	22.4575	22.4575	72.1588	28.9796	24.5403	27.439	23.7806	24.2594	24.4206	79.1419	32.3997	28.983	32.4142	29.1642	29.361	29.361	76.6695	42.3668	35.6548	38.8154	35.2559	35.7738	35.7739	66.5218	24.9698	22.7848	24.6662	22.0363	22.4784	22.4784	77.4014	23.9362	26.195	28.522	25.6305	26.0309	26.0309	62.1205
81.0671	34.5057	31.2947	34.175	31.3655	31.6168	31.6168	75.492	20.7232	22.2672	24.3275	21.9887	22.1873	22.1873	73.1751	29.688	24.1838	26.821	23.4553	23.8965	24.0302	80.2566	31.7047	28.5738	31.705	28.7093	28.9079	28.9079	77.7493	43.1057	35.2862	38.1003	34.8797	35.3202	35.3202	67.4587	24.0132	22.2831	23.8174	21.554	21.9506	21.9506	78.4916	22.2764	25.8213	27.8352	25.2991	25.6361	25.6361	62.9955
82.193	32.2332	30.8007	33.2937	30.8125	31.0562	31.0562	76.5405	23.3344	22.0034	23.84	21.7184	21.9176	21.9176	74.1914	27.5527	23.8259	26.1858	23.1342	23.5355	23.6414	81.3713	32.3064	28.1633	30.9786	28.2564	28.455	28.455	78.8292	44.0153	34.9157	37.372	34.5073	34.868	34.8681	68.3956	24.8409	21.7829	22.9622	21.0802	21.4289	21.429	79.5817	25.0856	25.4469	27.1391	24.9722	25.2439	25.2439	63.8704
83.3189	32.772	30.3061	32.3993	30.2636	30.4974	30.4974	77.589	24.5173	21.7384	23.3407	21.4503	21.6485	21.6485	75.2077	27.4717	23.4666	25.5352	22.8175	23.1766	23.2544	82.486	33.376	27.7517	30.2368	27.8059	28.0027	28.0027	79.909	45.3196	34.5436	36.6315	34.1386	34.4174	34.4175	69.3325	22.6567	21.2846	22.1035	20.6151	20.9139	20.9139	80.6719	27.4196	25.0719	26.4353	24.6496	24.8546	24.8546	64.7453
84.4449	31.2607	29.8114	31.4942	29.7191	29.941	29.941	78.6375	24.3188	21.4721	22.8305	21.1844	21.3803	21.3803	76.2241	24.9339	23.1063	24.8711	22.5051	22.8199	22.8695	83.6006	34.2002	27.3393	29.4817	27.3582	27.5512	27.5512	80.9889	44.078	34.1699	35.8803	33.7737	33.9687	33.9689	70.2695	20.3623	20.7887	21.2441	20.1587	20.4057	20.4057	81.7621	28.5338	24.6967	25.7254	24.3314	24.4683	24.4683	65.6203
85.5708	30.5816	29.3167	30.5807	29.1793	29.3875	29.3875	79.686	21.983	21.2048	22.3107	20.9209	21.1129	21.1129	77.2404	22.9817	22.745	24.1954	22.1971	22.4656	22.4869	84.7153	33.1538	26.9262	28.7152	26.9135	27.1011	27.1011	82.0687	40.8449	33.7948	35.1196	33.4126	33.5221	33.5222	71.2064	18.2224	20.2954	20.3864	19.711	19.9046	19.9046	82.8522	29.5481	24.3214	25.0108	24.0176	24.085	24.0851	66.4952
86.6967	30.0171	28.8223	29.6608	28.6447	28.8371	28.8371	80.7345	22.5753	20.9365	21.7824	20.6599	20.8465	20.8465	78.2567	18.6814	22.3832	23.5101	21.8934	22.1139	22.107	85.83	32.0465	26.5128	27.939	26.4722	26.6527	26.6527	83.1486	37.6294	33.4185	34.3506	33.0553	33.0776	33.0778	72.1433	18.0303	19.8052	19.5332	19.2721	19.4109	19.411	83.9424	29.5973	23.9462	24.293	23.7082	23.705	23.7051	67.3702
87.8227	29.4373	28.3285	28.737	28.1155	28.2904	28.2904	81.783	23.8082	20.6675	21.2469	20.4013	20.5813	20.5813	79.273	19.56	22.0209	22.8169	21.5942	21.765	21.7298	86.9447	33.8306	26.0991	27.1551	26.0346	26.2062	26.2062	84.2284	33.2049	33.041	33.5747	32.7019	32.6356	32.6358	73.0802	18.5075	19.3184	18.6867	18.8419	18.9249	18.9249	85.0325	29.2305	23.5711	23.5733	23.4031	23.3284	23.3285	68.2451
88.9486	27.0088	27.8355	27.8112	27.592	27.7477	27.7477	82.8315	22.8387	20.3977	20.7052	20.1454	20.3173	20.3173	80.2893	20.4286	21.6583	22.1178	21.2993	21.4189	21.3555	88.0593	33.4374	25.6855	26.3654	25.6008	25.762	25.762	85.3083	35.1295	32.6624	32.793	32.3524	32.196	32.1963	74.0172	17.3403	18.8354	17.8493	18.4205	18.4466	18.4467	86.1227	28.9436	23.1965	22.8533	23.1023	22.9552	22.9553	69.12
90.0745	25.5662	27.3437	26.8855	27.0745	27.2093	27.2093	83.88	20.9297	20.1273	20.1586	19.892	20.0546	20.0546	81.3057	20.4062	21.2958	21.4146	21.0087	21.0758	20.9845	89.174	27.472	25.272	25.5716	25.1711	25.3203	25.3203	86.3881	36.5509	32.2831	32.0068	32.0068	31.7592	31.7595	74.9541	19.1066	18.3564	17.023	18.0078	17.9763	17.9764	87.2129	27.9486	22.8224	22.1343	22.8058	22.5856	22.5857	69.995
91.2005	27.9902	26.8532	25.962	26.5631	26.6755	26.6755	84.9285	17.8719	19.8565	19.6082	19.6413	19.7934	19.7934	82.322	23.8916	20.9334	20.709	20.7225	20.7358	20.6167	90.2887	25.9757	24.859	24.7756	24.7456	24.8814	24.8814	87.468	38.9888	31.9029	31.2173	31.665	31.3252	31.3255	75.891	21.8803	17.8818	16.2099	17.6037	17.5141	17.5142	88.303	23.4172	22.4491	21.4176	22.5136	22.2196	22.2197	70.8699
92.3264	27.0833	26.3643	25.0426	26.058	26.1467	26.1467	85.977	19.6528	19.5853	19.055	19.3933	19.5337	19.5337	83.3383	25.8285	20.5714	20.0029	20.4406	20.3989	20.2524	91.4034	25.9688	24.4466	23.979	24.3246	24.4455	24.4455	88.5478	42.1575	31.5222	30.4257	31.3271	30.8941	30.8944	76.8279	23.223	17.4118	15.4117	17.2082	17.06	17.0601	89.3932	20.1374	22.0767	20.7044	22.2255	21.8574	21.8574	71.7448
93.4523	26.3428	25.8772	24.1291	25.5595	25.623	25.623	87.0255	20.8216	19.3139	18.5003	19.1481	19.2757	19.2757	84.3546	26.1191	20.21	19.2978	20.163	20.0654	19.8916	92.518	27.035	24.0351	23.1836	23.9082	24.0129	24.0129	89.6277	43.0603	31.141	29.6332	30.9932	30.4661	30.4664	77.7649	24.3331	16.9468	14.6302	16.8212	16.6143	16.6144	90.4833	22.3612	21.7054	19.9959	21.9417	21.4989	21.499	72.6198
94.5783	25.683	25.3921	23.2233	25.0676	25.1047	25.1047	88.074	21.5815	19.0424	17.945	18.9056	19.0193	19.0193	85.3709	23.7013	19.8493	18.5954	19.8896	19.7353	19.5346	93.6327	27.7162	23.6245	22.3908	23.4966	23.5838	23.5838	90.7075	40.0254	30.7594	28.8408	30.663	30.0412	30.0416	78.7018	20.5235	16.4871	13.8668	16.4425	16.1769	16.1769	91.5735	24.5652	21.3352	19.2934	21.6619	21.1442	21.1443	73.4947
95.7042	24.006	24.9094	22.3268	24.5824	24.592	24.592	89.1225	21.5827	18.7709	17.3901	18.6659	18.7646	18.7646	86.3873	21.615	19.4896	17.8972	19.6205	19.4086	19.1814	94.7474	26.5434	23.2151	21.6024	23.0898	23.1583	23.1583	91.7874	35.196	30.3776	28.0498	30.3367	29.6196	29.62	79.6387	15.1042	16.0328	13.123	16.0721	15.7478	15.7479	92.6637	25.2404	20.9665	18.5979	21.3863	20.7935	20.7936	74.3696
96.8301	23.904	24.4291	21.4413	24.1042	24.0852	24.0852	90.171	22.6013	18.4994	16.8367	18.429	18.5118	18.5118	87.4036	19.5956	19.1311	17.2047	19.3555	19.0854	18.832	95.8621	25.9908	22.807	20.8197	22.688	22.7366	22.7366	92.8672	28.6324	29.9957	27.261	30.0143	29.2014	29.2018	80.5757	11.3572	15.5842	12.3998	15.71	15.3272	15.3273	93.7538	24.9744	20.5992	17.9105	21.1148	20.4467	20.4468	75.2446
97.956	24.4623	23.9515	20.5682	23.6329	23.5844	23.5844	91.2195	25.2494	18.2282	16.2858	18.1949	18.2609	18.2609	88.4199	21.263	18.7738	16.5194	19.0946	18.7658	18.4867	96.9767	28.1171	22.4006	20.0442	22.2913	22.319	22.319	93.9471	23.7229	29.6138	26.4757	29.6957	28.7866	28.787	81.5126	11.3545	15.1415	11.6984	15.3558	14.915	14.9151	94.844	23.4309	20.2336	17.2321	20.8472	20.1039	20.104	76.1195
99.082	24.5442	23.4769	19.7089	23.1687	23.0897	23.0897	92.268	23.7525	17.9573	15.7383	17.9636	18.0119	18.0119	89.4362	21.4114	18.418	15.8424	18.8378	18.4498	18.1455	98.0914	26.591	21.9958	19.2773	21.8997	21.9055	21.9055	95.0269	21.4939	29.2321	25.6948	29.3808	28.3753	28.3758	82.4495	10.8474	14.705	11.0196	15.0097	14.5113	14.5114	95.9341	23.9767	19.8698	16.5637	20.5836	19.7652	19.7653	76.9945
100.208	20.6198	23.0053	18.8647	22.7116	22.6014	22.6014	93.3165	22.3859	17.6868	15.195	17.7351	17.7648	17.7648	90.4526	18.2104	18.0639	15.1751	18.585	18.1374	17.8084	99.2061	20.7483	21.593	18.5201	21.5133	21.4963	21.4963	96.1068	24.731	28.8507	24.9192	29.0697	27.9677	27.9681	83.3864	10.1071	14.2749	10.3641	14.6713	14.116	14.1161	97.0243	23.273	19.508	15.9061	20.3239	19.4305	19.4306	77.8694
101.334	18.8244	22.5371	18.0367	22.2616	22.1196	22.1196	94.3651	16.1249	17.4168	14.6568	17.5095	17.5199	17.5199	91.4689	14.4806	17.7116	14.5185	18.3362	17.8288	17.4755	100.321	16.6035	21.1922	17.7739	21.1322	21.0915	21.0915	97.1866	25.3618	28.4696	24.15	28.7624	27.5637	27.5641	84.3233	11.8895	13.8513	9.73259	14.3407	13.729	13.7291	98.1145	18.937	19.1482	15.2601	20.068	19.0999	19.1	78.7443
102.46	16.692	22.0724	17.2261	21.8187	21.6443	21.6443	95.4135	16.1111	17.1475	14.1245	17.2867	17.2769	17.2769	92.4852	12.9887	17.3613	13.8739	18.0914	17.5239	17.1468	101.435	17.3453	20.7936	17.0398	20.7564	20.6912	20.6912	98.2665	26.33	28.089	23.3878	28.4588	27.1634	27.1639	85.2603	13.9674	13.4344	9.12538	14.0175	13.3505	13.3506	99.2046	11.9379	18.7907	14.6265	19.816	18.7734	18.7735	79.6193
103.586	17.2951	21.6113	16.4337	21.3831	21.1756	21.1756	96.4621	16.9334	16.8789	13.5989	17.0668	17.0361	17.0361	93.5015	13.5239	17.0132	13.242	17.8504	17.2228	16.8225	102.55	16.977	20.3974	16.3187	20.386	20.2956	20.2956	99.3464	27.006	27.709	22.6337	28.1589	26.7668	26.7674	86.1972	15.0237	13.0243	8.54283	13.7019	12.9802	12.9803	100.295	10.7896	18.4354	14.0059	19.5677	18.451	18.4512	80.4942
104.712	17.3111	21.1541	15.6605	20.9547	20.7138	20.7138	97.5105	17.5319	16.6111	13.0807	16.8496	16.7975	16.7975	94.5178	13.5959	16.6673	12.6239	17.6132	16.9255	16.5025	103.665	15.236	20.0038	15.6117	20.0209	19.9047	19.9047	100.426	23.298	27.3298	21.8883	27.8626	26.3741	26.3747	87.1341	13.4121	12.6213	7.9851	13.3935	12.6182	12.6183	101.385	10.076	18.0827	13.3989	19.3232	18.1328	18.133	81.3691
105.838	15.0718	20.7009	14.9072	20.5335	20.2587	20.2587	98.5591	15.7996	16.3442	12.5705	16.6352	16.561	16.561	95.5342	11.0541	16.3239	12.0203	17.3799	16.632	16.1869	104.779	10.8839	19.6128	14.9195	19.6613	19.5186	19.5186	101.506	20.1898	26.9514	21.1525	27.57	25.9853	25.9859	88.0711	9.74644	12.2254	7.45224	13.0922	12.2643	12.2644	102.475	9.9615	17.7324	12.806	19.0823	17.8188	17.8189	82.2441
106.964	13.519	20.2518	14.1745	20.1194	19.8106	19.8106	99.6075	12.7228	16.0783	12.069	16.4236	16.3268	16.3268	96.5505	10.7204	15.9831	11.432	17.1502	16.3423	15.8757	105.894	7.90478	19.2246	14.243	19.307	19.1373	19.1373	102.586	14.1439	26.574	20.427	27.2809	25.6004	25.601	89.008	10.0427	11.8367	6.94419	12.798	11.9186	11.9187	103.565	8.73744	17.3849	12.2278	18.845	17.5089	17.509	83.119
108.089	14.9818	19.8071	13.463	19.7125	19.3694	19.3694	100.656	12.1863	15.8136	11.5767	16.2148	16.0947	16.0947	97.5668	12.9188	15.6449	10.8595	16.9242	16.0565	15.5688	107.009	7.03588	18.8394	13.5828	18.9582	18.761	18.761	103.666	10.3975	26.1976	19.7123	26.9955	25.2194	25.22	89.9449	10.2415	11.4554	6.46077	12.5107	11.5809	11.581	104.655	10.7598	17.0402	11.6646	18.6112	17.2031	17.2033	83.9939
109.215	15.7611	19.3668	12.7731	19.3127	18.9352	18.9352	101.705	10.6636	15.55	11.0942	16.0088	15.865	15.865	98.5831	13.8143	15.3096	10.3033	16.7018	15.7744	15.2665	108.123	7.29498	18.4573	12.9395	18.6147	18.3897	18.3897	104.746	9.37646	25.8224	19.0092	26.7135	24.8425	24.8431	90.8818	9.53564	11.0815	6.0017	12.2301	11.2512	11.2513	105.746	11.4526	16.6984	11.1167	18.381	16.9015	16.9017	84.8689
110.341	14.3423	18.9312	12.1052	18.9201	18.508	18.508	102.753	8.19377	15.2877	10.6219	15.8055	15.6375	15.6375	99.5994	12.3745	14.9773	9.76405	16.4829	15.4963	14.9685	109.238	6.55654	18.0784	12.3137	18.2767	18.0235	18.0235	105.825	9.83944	25.4484	18.3181	26.435	24.4695	24.4701	91.8188	6.58709	10.7152	5.56663	11.956	10.9292	10.9294	106.836	9.2975	16.3595	10.5846	18.1542	16.6041	16.6042	85.7438
111.467	9.41661	18.5003	11.4595	18.5344	18.0879	18.0879	103.802	4.19948	15.0268	10.1602	15.6049	15.4124	15.4124	100.616	7.66144	14.6481	9.24197	16.2676	15.2219	14.675	110.353	4.74681	17.7028	11.7058	17.944	17.6623	17.6623	106.905	7.40046	25.0758	17.6397	26.16	24.1005	24.1011	92.7557	4.56507	10.3565	5.15512	11.6885	10.6151	10.6152	107.926	4.71092	16.0238	10.0684	17.9308	16.3108	16.3109	86.6188
[truncated: 6 more columns]

## Sheet: WAT-202
spike_1							spike_2							spike_3							spike_4							spike_5							spike_6							spike_7
Z-axis_1	Thickness-profile_1	skewed gaussian_1	gaussian_1	lognorm_1	gamma_1	chi2_1	Z-axis_2	Thickness-profile_2	skewed gaussian_2	gaussian_2	lognorm_2	gamma_2	chi2_2	Z-axis_3	Thickness-profile_3	skewed gaussian_3	gaussian_3	lognorm_3	gamma_3	chi2_3	Z-axis_4	Thickness-profile_4	skewed gaussian_4	gaussian_4	lognorm_4	gamma_4	chi2_4	Z-axis_5	Thickness-profile_5	skewed gaussian_5	gaussian_5	lognorm_5	gamma_5	chi2_5	Z-axis_6	Thickness-profile_6	skewed gaussian_6	gaussian_6	lognorm_6	gamma_6	chi2_6	Z-axis_7	Thickness-profile_7	skewed gaussian_7	gaussian_7	lognorm_7	gamma_7	chi2_7
0	1.92468	0.633177	7.84258	0.144857	0	0	0	1.87512	0.211505	0.744784	0.174516	0.178947	0.17895	0	2.70152	0.119681	9.96954	0	0	0	0	1.86034	0.158066	8.79085	0	0	0	0	2.83765	0.629001	9.95731	0.129039	0	0	0	3.49279	0.930689	10.8363	0.0211016	0	0	0	2.37772	0.00148202	5.50595	0	0	0
0.937504	3.82565	0.849163	8.34456	0.306408	0	0	0.706669	1.70549	0.255149	0.84044	0.216882	0.222855	0.222858	1.04242	3.3306	0.201293	10.6067	0	0	0	0.9701	3.13412	0.250329	9.28458	0	0	0	1.03254	3.53481	0.890539	10.6013	0.32285	0	0	0.856781	4.55189	1.27755	11.4228	0.123045	0	0	0.964348	2.59706	0.00329782	5.9403	0	0	0
1.87501	4.87769	1.12441	8.86716	0.56806	0	0	1.41333	1.80419	0.30656	0.946416	0.267724	0.275532	0.275536	2.08484	3.55412	0.329444	11.2691	0	0	0	1.9402	3.29984	0.387289	9.79509	0	0	0	2.06509	3.76016	1.23927	11.2712	0.667088	0	0	1.71356	5.18646	1.72512	12.0273	0.393443	0	0	1.9287	2.52625	0.00707547	6.39839	0	0	0
2.81251	4.65664	1.47016	9.41025	0.952831	0	0	2.12	1.88851	0.366852	1.06355	0.328321	0.338278	0.338282	3.12725	3.29899	0.524778	11.9565	6.19168e-07	0	0	2.91029	3.076	0.585453	10.3221	0	0	0	3.09763	3.31972	1.69536	11.9665	1.20188	0	0	2.57034	5.14624	2.29195	12.6492	0.905596	0	0	2.89304	2.55266	0.0146391	6.88047	0	0	0
3.75002	4.5903	1.8983	9.97364	1.47818	0.218465	0.218131	2.82667	1.84527	0.437248	1.1927	0.400062	0.412494	0.412498	4.16967	3.9567	0.813797	12.6683	0.00538518	0	0	3.88039	3.0951	0.864913	10.8654	0	0	0	4.13017	3.95568	2.28039	12.6869	1.95532	0	0	3.42712	4.84695	2.99649	13.2882	1.70067	0	0	3.85739	3.24659	0.0292132	7.38671	0	0	0
4.68752	4.7742	2.42089	10.557	2.15476	0.88409	0.883582	3.53334	1.98904	0.519072	1.33476	0.484439	0.49968	0.499684	5.21209	5.30259	1.2289	13.4041	0.096432	0	0	4.85049	4.09694	1.24904	11.4245	3.70233e-11	0	0	5.16272	5.80463	3.01644	13.4317	2.94125	0.276128	0	4.2839	4.83256	3.85598	13.9434	2.78656	0	0	4.82174	3.71359	0.0562391	7.91717	0	0	0
5.62502	4.5975	3.04966	11.1601	2.98615	1.86105	1.86047	4.24001	2.19563	0.613758	1.49065	0.583045	0.601425	0.601429	6.25451	4.20326	1.80762	14.1632	0.459945	0	0	5.82059	4.57903	1.76366	11.9989	0.0205541	0	0	6.19526	5.97312	3.9247	14.2004	4.15954	1.66797	0	5.14068	4.62637	4.88503	14.6142	4.14507	0.469043	0	5.78609	3.86373	0.10447	8.47178	0	0	0
6.56253	4.92689	3.79537	11.7822	3.96932	3.0697	3.06909	4.94667	2.21636	0.72284	1.6613	0.697554	0.719393	0.719398	7.29693	4.59339	2.59081	14.9447	1.25836	0	0	6.79069	4.26798	2.43564	12.5881	0.300739	0	0	7.2278	6.65882	5.02392	14.9919	5.59802	3.56842	0	5.99746	6.08446	6.09421	15.2998	5.7408	3.11003	0	6.75043	4.43759	0.187306	9.05035	6.70695e-13	0	0
7.50003	6.48777	4.66712	12.4229	5.09555	4.45166	4.45106	5.65334	2.21511	0.847944	1.84765	0.829713	0.855309	0.855314	8.33935	4.46879	3.61962	15.7477	2.55769	0	0	7.76078	4.87579	3.29085	13.1916	1.11515	0	0	8.26034	6.03107	6.32867	15.8053	7.23508	5.74648	2.08818	6.85424	7.0265	7.48865	15.9992	7.52912	5.87326	0	7.71478	4.75472	0.324221	9.65253	0.000803532	0	0
8.43753	7.31762	5.67163	13.0815	6.35158	5.96089	5.96033	6.36001	2.58776	0.990784	2.05064	0.981327	1.01094	1.01095	9.38177	4.42222	4.93142	16.571	4.33741	0	0	8.73088	4.8158	4.35168	13.8085	2.49892	0	0	9.29288	5.67541	7.84756	16.6395	9.04246	8.08022	5.00991	7.71102	7.9066	9.06679	16.7114	9.4622	8.59343	0	8.67913	4.9615	0.542005	10.2779	0.036179	0	0
9.37504	8.26651	6.81253	13.757	7.72081	7.55988	7.55936	7.06667	3.20728	1.15314	2.27122	1.15423	1.18808	1.18809	10.4242	6.15254	6.55495	17.4135	6.52373	2.29538	2.29464	9.70098	4.73548	5.63416	14.4381	4.34828	0	0	10.3254	5.66189	9.58163	17.4931	10.9879	10.4908	8.05265	8.5678	8.2748	10.8195	17.4354	11.493	11.2177	0	9.64347	4.43376	0.875383	10.9257	0.240245	0	0
10.3125	7.88044	8.08973	14.4487	9.18446	9.21757	9.21711	7.77335	3.0788	1.33686	2.51032	1.35026	1.38853	1.38853	11.4666	7.68763	8.50526	18.2736	9.01919	6.85616	6.85578	10.6711	4.57946	7.14526	15.0796	6.52164	0	0	11.358	7.90332	11.5231	18.3647	13.0374	12.923	11.078	9.42458	7.43333	12.7299	18.17	13.5781	13.7218	0	10.6078	5.35667	1.3665	11.5954	0.775957	0	0
11.25	7.68011	9.49896	15.1555	10.7226	10.908	10.9076	8.48001	3.24603	1.54381	2.76883	1.57125	1.61402	1.61403	12.509	9.66525	10.7792	19.15	11.7224	10.968	10.9678	11.6412	6.34598	8.88049	15.732	8.88566	4.32623	4.32591	12.3905	11.8965	13.6548	19.2527	15.1569	15.3364	14.0196	10.2814	8.05837	14.773	18.9138	15.6788	16.0936	0	11.5722	5.53676	2.06273	12.2858	1.73826	0	0
12.1875	7.34999	11.0315	15.8761	12.3149	12.6095	12.6091	9.18668	3.44746	1.77589	3.04764	1.81899	1.86629	1.86629	13.5514	12.7581	13.3523	20.0408	14.5392	14.7038	14.7037	12.6113	7.81587	10.8224	16.3943	11.3306	9.7437	9.74361	13.4231	17.3164	15.9498	20.1553	17.3138	17.701	16.8407	11.1381	9.86126	16.917	19.6656	17.7618	18.3276	11.6811	12.5365	6.51598	3.01257	12.9959	3.13702	0.78219	0.782364
13.1251	8.96904	12.6739	16.6095	13.9416	14.3037	14.3034	9.89335	3.73102	2.03496	3.34758	2.09519	2.14694	2.14695	14.5939	13.6954	16.1781	20.9443	17.3884	18.103	18.103	13.5814	9.96091	12.9402	17.0654	13.7724	13.6199	13.6199	14.4556	20.1353	18.3725	21.0705	19.4778	19.9943	19.5198	11.9949	14.6429	19.1245	20.4239	19.7994	20.4219	18.2821	13.5009	6.54258	4.25955	13.7245	4.92074	3.66142	3.66154
14.0626	11.1353	14.4086	17.3542	15.5836	15.9754	15.9752	10.6	3.59183	2.32286	3.66942	2.40144	2.4575	2.4575	15.6363	15.4679	19.1894	21.8584	20.2033	21.1948	21.1949	14.5515	16.4734	15.1908	17.7441	16.15	16.7477	16.7477	15.4881	18.8066	20.8798	21.9964	21.6216	22.1994	22.0445	12.8517	22.8015	21.3543	21.1871	21.7691	22.3772	22.5309	14.4652	6.94579	5.83485	14.4702	7.0057	6.64014	6.64019
15.0001	15.7501	16.2142	18.1088	17.2234	17.6119	17.6117	11.3067	3.62808	2.64135	4.01386	2.73921	2.79931	2.79931	16.6787	17.8057	22.3031	22.7811	22.9315	24.0032	24.0033	15.5216	21.2512	17.5214	18.4293	18.421	19.3769	19.3769	16.5207	21.2839	23.4237	22.9307	23.7209	24.3039	24.4083	13.7085	32.7686	23.5635	21.9538	23.6533	24.1956	25.7015	15.4296	7.58981	7.74978	15.2313	9.29805	9.5392	9.53921
15.9376	20.3376	18.0658	18.8716	18.8449	19.2026	19.2025	12.0134	4.43766	2.99206	4.38154	3.10979	3.17358	3.17358	17.7211	21.3093	25.4263	23.7102	25.5332	26.549	26.5492	16.4917	22.278	19.8726	19.1195	20.5575	21.6319	21.6319	17.5532	21.6286	25.9532	23.8712	25.7552	26.2987	26.6085	14.5653	39.2417	25.7102	22.7222	25.4385	25.8802	28.2031	16.3939	8.07464	9.98954	16.006	11.7075	12.2973	12.2973
16.8751	19.5441	19.9367	19.6411	20.4338	20.7389	20.7388	12.72	4.85061	3.37649	4.77299	3.51426	3.58128	3.58127	18.7635	29.3941	28.4648	24.6433	27.9801	28.8509	28.8511	17.4618	23.499	22.1832	19.8134	22.5426	23.5879	23.588	18.5858	24.8033	28.418	24.8153	27.7071	28.1776	28.6453	15.422	39.8007	27.7552	23.4905	27.1151	27.435	30.2329	17.3583	7.61307	12.51	16.7926	14.1546	14.8871	14.8871
17.8126	19.1721	21.799	20.4154	21.9774	22.2138	22.2137	13.4267	5.19119	3.79596	5.18864	3.95347	4.02316	4.02315	19.806	41.14	31.3306	25.5779	30.2531	30.926	30.9262	18.4319	25.1418	24.3948	20.5096	24.3678	25.2958	25.2958	19.6183	35.6613	30.7705	25.7606	29.5625	29.9366	30.5208	16.2788	34.305	29.6647	24.2571	28.6766	28.8643	31.9053	18.3226	8.91662	15.2384	17.5888	16.5735	17.2965	17.2965
18.7501	20.9964	23.6247	21.1927	23.4651	23.6217	23.6216	14.1334	5.62855	4.25154	5.62881	4.42801	4.49972	4.49971	20.8484	45.436	33.9498	26.5116	32.3407	32.7897	32.7898	19.402	21.9163	26.4556	21.2066	26.0302	26.7922	26.7923	20.6509	44.074	32.969	26.7043	31.3104	31.5735	32.2384	17.1356	32.1914	31.4113	25.0201	30.1192	30.1727	33.2945	19.2869	15.1727	18.0794	18.3925	18.9123	19.5215	19.5214
19.6876	23.6288	25.3871	21.971	24.8878	24.9583	24.9583	14.84	5.81277	4.74405	6.09366	4.93816	5.01114	5.01113	21.8908	43.3431	36.2675	27.4416	34.2372	34.4564	34.4566	20.3721	22.4268	28.3245	21.9027	27.5315	28.1053	28.1053	21.6834	45.9898	34.9795	27.6438	32.9425	33.0874	33.8025	17.9924	29.268	32.9751	25.7775	31.4412	31.365	34.4523	20.2513	22.2691	20.924	19.2013	21.1321	21.5627	21.5626
20.6251	24.8018	27.0619	22.7483	26.2381	26.2203	26.2203	15.5467	5.90117	5.27401	6.58323	5.48389	5.55733	5.55732	22.9332	40.8355	38.2506	28.3653	35.942	35.9396	35.9398	21.3422	26.9756	29.9727	22.5964	28.8759	29.2572	29.2572	22.7159	42.3349	36.7769	28.5761	34.4528	34.4788	35.2182	18.8492	24.2198	34.3445	26.5275	32.6429	32.4463	35.4166	21.2156	24.9215	23.6619	20.0128	23.2052	23.4238	23.4237
21.5626	28.2775	28.628	23.5226	27.5103	27.4055	27.4056	16.2534	5.99105	5.84159	7.0974	6.06486	6.13788	6.13787	23.9756	33.9451	39.8879	29.2798	37.4577	37.2518	37.2519	22.3123	37.185	31.3848	23.2861	30.0701	30.2661	30.2661	23.7485	37.6745	38.3458	29.4984	35.8378	35.7491	36.4913	19.7059	25.8374	35.5153	27.2681	33.7259	33.4214	36.2165	22.18	27.854	26.1935	20.8242	25.1135	25.1103	25.1102
22.5001	36.9632	30.0682	24.2917	28.7	28.5124	28.5125	16.96	6.45476	6.44659	7.63587	6.68031	6.752	6.75198	25.018	29.4077	41.188	30.1822	38.7897	38.4044	38.4046	23.2824	41.7279	32.5583	23.97	31.1216	31.147	31.147	24.781	31.9168	39.6803	30.4078	37.0958	36.9005	37.6275	20.5627	30.0408	36.4905	27.9974	34.6929	34.2953	36.8749	23.1443	33.173	28.4404	21.633	26.8464	26.6288	26.6287
23.4376	39.394	31.3696	25.0533	29.8041	29.5402	29.5403	17.6667	5.87044	7.08842	8.19817	7.3292	7.39858	7.39857	26.0605	30.5547	42.1751	31.0698	39.9455	39.4086	39.4087	24.2525	38.8085	33.5017	24.6465	32.0388	31.9127	31.9127	25.8136	29.7746	40.7831	31.3011	38.2266	37.9357	38.633	21.4195	37.5427	37.279	28.7132	35.5477	35.0728	37.4101	24.1087	33.8419	30.3519	22.4363	28.3995	27.9867	27.9867
24.3751	39.4268	32.5241	25.8053	30.8206	30.4888	30.4889	18.3734	6.64126	7.76606	8.78366	8.01005	8.07619	8.07617	27.1029	41.466	42.8838	31.9396	40.9336	40.2744	40.2745	25.2225	36.5627	34.2323	25.3138	32.8305	32.5743	32.5743	26.8461	34.0506	41.6641	32.1755	39.2314	38.8581	39.5142	22.2763	40.9219	37.8943	29.4137	36.2946	35.7588	37.8375	25.073	32.1191	31.9065	23.2311	29.7731	29.1919	29.1918
25.3126	37.7711	33.5278	26.5453	31.7488	31.3585	31.3586	19.08	7.58652	8.47804	9.39145	8.72106	8.78298	8.78296	28.1453	48.2325	43.3546	32.7887	41.7635	41.0115	41.0116	26.1926	32.0379	34.7732	25.9701	33.5055	33.1413	33.1413	27.8787	45.4027	42.3391	33.0278	40.1127	39.6711	40.2771	23.1331	41.6777	38.3531	30.0968	36.9383	36.358	38.1695	26.0374	29.3975	33.1103	24.0145	30.971	30.2522	30.2522
26.2501	35.8115	34.3812	27.2712	32.5885	32.1502	32.1503	19.7867	7.76832	9.22245	10.0205	9.46002	9.51682	9.51679	29.1877	46.1076	43.6291	33.6141	42.4453	41.6289	41.6289	27.1627	28.1676	35.1509	26.6136	34.0725	33.6222	33.6222	28.9112	48.8393	42.8277	33.8551	40.8739	40.379	40.928	23.9898	39.4319	38.6735	30.7606	37.4839	36.8749	38.4171	27.0017	34.1696	33.9906	24.7836	31.9993	31.1759	31.1758
27.1876	32.2715	35.0883	27.9805	33.3405	32.865	32.8652	20.4934	8.64151	9.99694	10.6695	10.2244	10.2752	10.2752	30.2301	45.4417	43.7465	34.413	42.989	42.1349	42.135	28.1328	26.9346	35.3921	27.2427	34.5398	34.0243	34.0244	29.9437	46.7093	43.1514	34.6545	41.5189	40.9857	41.4731	24.8466	37.6682	38.8745	31.403	37.9367	37.3141	38.5895	27.9661	37.8192	34.5892	25.5353	32.8663	31.9708	31.9708
28.1251	30.9306	35.6564	28.671	34.0063	33.5046	33.5047	21.2	9.45643	10.7987	11.337	11.0113	11.0553	11.0553	31.2725	45.6938	43.7419	35.1825	43.4048	42.5376	42.5376	29.1029	28.7953	35.5225	27.8555	34.9155	34.3546	34.3546	30.9763	43.6616	43.3328	35.4229	42.0525	41.4956	41.9183	25.7034	38.2294	38.9742	32.0222	38.3022	37.6797	38.6946	28.9304	36.0608	34.9541	26.2666	33.5812	32.6448	32.6448
29.0626	29.6018	36.0948	29.3404	34.5879	34.0707	34.0708	21.9067	9.55152	11.6244	12.0214	11.8176	11.8541	11.8541	32.315	42.3094	43.6442	35.9198	43.7026	42.8444	42.8444	30.073	35.3182	35.5651	28.4502	35.2073	34.6188	34.6188	32.0088	39.8584	43.3935	36.1575	42.4797	41.9132	42.2696	26.5602	35.6788	38.9897	32.6163	38.5857	37.9759	38.7394	29.8948	34.6066	35.1337	26.9743	34.1539	33.2056	33.2056
30.0001	33.2918	36.4147	29.9865	35.0875	34.5654	34.5655	22.6134	8.73372	12.4704	12.7206	12.6397	12.6681	12.6681	33.3574	37.5879	43.4766	36.6223	43.8922	43.0623	43.0622	31.0431	42.7413	35.5397	29.0253	35.4223	34.8225	34.8225	33.0414	35.8089	43.3536	36.8556	42.8059	42.243	42.5327	27.417	34.6016	38.9359	33.1834	38.7926	38.2068	38.73	30.8591	34.9214	35.1719	27.6557	34.5949	33.6607	33.6606
30.9376	37.4299	36.628	30.607	35.5081	34.9909	34.991	23.32	9.30358	13.3327	13.4326	13.4739	13.4938	13.4937	34.3998	36.2562	43.2568	37.2872	43.9827	43.1978	43.1978	32.0132	42.2713	35.4622	29.5789	35.5675	34.9705	34.9705	34.0739	31.6537	43.2312	37.5144	43.0368	42.4894	42.713	28.2737	32.9105	38.8261	33.7217	38.9281	38.3763	38.6719	31.8235	37.4507	35.1054	28.3076	34.9144	34.0171	34.0171
31.8751	38.0653	36.747	31.1999	35.8527	35.3495	35.3496	24.0267	10.8026	14.2069	14.1551	14.3162	14.3272	14.3271	35.4422	42.868	42.9978	37.9121	43.983	43.2572	43.2572	32.9833	41.8647	35.3453	30.1093	35.649	35.0674	35.0674	35.1065	34.551	43.0417	38.1313	43.1779	42.6569	42.8159	29.1305	35.6924	38.6712	34.2296	38.9974	38.488	38.5699	32.7878	34.439	34.9632	28.9273	35.1227	34.2817	34.2817
32.8126	35.9076	36.7839	31.7629	36.1246	35.6437	35.6438	24.7334	12.711	15.0881	14.8855	15.1625	15.1644	15.1643	36.4846	45.2942	42.7086	38.4946	43.9015	43.2463	43.2463	33.9534	38.9952	35.1987	30.6151	35.6727	35.1172	35.1172	36.139	43.5261	42.7981	38.704	43.2351	42.7499	42.8466	29.9873	41.7854	38.48	34.7054	39.0053	38.5456	38.4283	33.7522	32.3331	34.7667	29.512	35.2297	34.4613	34.4613
33.7501	34.7982	36.7499	32.2941	36.3272	35.8762	35.8763	25.44	14.1051	15.9716	15.6212	16.0084	16.0011	16.0011	37.5271	44.844	42.3955	39.0323	43.7459	43.1706	43.1705	34.9235	33.2696	35.0293	31.0946	35.6441	35.1238	35.1238	37.1715	45.468	42.5108	39.2302	43.2141	42.7729	42.8099	30.8441	41.6833	38.2598	35.1476	38.9566	38.5524	38.251	34.7165	31.0112	34.5309	30.059	35.2448	34.562	34.562
34.6876	37.1249	36.6558	32.7916	36.4642	36.0495	36.0496	26.1467	14.7379	16.852	16.3593	16.8495	16.8332	16.8332	38.5695	40.8518	42.0626	39.5232	43.5237	43.0351	43.0351	35.8936	30.1747	34.8421	31.5464	35.5683	35.0905	35.0905	38.2041	45.2842	42.1882	39.7076	43.1204	42.7301	42.7108	31.7009	42.1915	38.0159	35.5547	38.8559	38.5117	38.0415	35.6809	35.7896	34.2658	30.5659	35.1771	34.5898	34.5899
35.6252	34.3576	36.5108	33.2535	36.5391	36.1664	36.1664	26.8534	16.1222	17.7242	17.0968	17.6814	17.6564	17.6563	39.6119	41.5109	41.7127	39.9654	43.2417	42.8448	42.8447	36.8637	28.5369	34.6406	31.969	35.4499	35.0205	35.0205	39.2366	44.4761	41.8367	40.1345	42.9595	42.6256	42.5536	32.5576	41.0405	37.7526	35.9254	38.7073	38.4267	37.8028	36.6452	34.4141	33.9781	31.0302	35.0351	34.5506	34.5506
36.5627	34.0883	36.3231	33.6782	36.5556	36.2294	36.2295	27.56	18.3218	18.5827	17.8305	18.4995	18.4662	18.4661	40.6543	40.2829	41.3476	40.357	42.9062	42.6041	42.604	37.8338	25.423	34.4271	32.3611	35.2931	34.9168	34.9168	40.2692	43.9484	41.4613	40.509	42.7369	42.4637	42.3427	33.4144	38.0522	37.473	36.2585	38.5152	38.3004	37.538	37.6095	32.9522	33.6717	31.4498	34.8267	34.4496	34.4496
37.5002	32.815	36.0998	34.064	36.5173	36.2414	36.2415	28.2667	21.2955	19.4223	18.5571	19.2993	19.2583	19.2583	41.6967	38.8503	40.9685	40.6965	42.5233	42.3173	42.3172	38.8039	29.606	34.2031	32.7214	35.1019	34.7822	34.7821	41.3017	41.4181	41.0656	40.8296	42.4576	42.2481	42.0823	34.2712	38.622	37.1794	36.5528	38.2832	38.1356	37.2495	38.5739	30.7211	33.3492	31.8227	34.5593	34.292	34.292
38.4377	33.2295	35.8469	34.4096	36.4278	36.205	36.2051	28.9734	23.6795	20.2375	19.2734	20.0766	20.0286	20.0286	42.7392	36.3961	40.5764	40.9826	42.0983	41.9884	41.9883	39.774	35.2005	33.9698	33.0487	34.8799	34.619	34.619	42.3343	38.5411	40.6525	41.0949	42.1265	41.9827	41.7762	35.128	37.574	36.8735	36.8073	38.015	37.935	36.9399	39.5382	32.2784	33.0122	32.1471	34.2398	34.0826	34.0826
39.3752	37.3547	35.569	34.7135	36.2906	36.1229	36.1229	29.68	23.9872	21.0234	19.9758	20.827	20.7729	20.7729	43.7816	40.8589	40.1718	41.214	41.6364	41.6211	41.621	40.7441	37.1484	33.7277	33.3421	34.6305	34.4297	34.4297	43.3668	33.5709	40.2239	41.3039	41.7485	41.6713	41.4283	35.9847	36.0164	36.5566	37.0212	37.7142	37.7013	36.6111	40.5026	34.0746	32.6617	32.4215	33.8745	33.8261	33.8261
40.3127	36.5647	35.2702	34.9746	36.1092	35.9977	35.9977	30.3867	24.0152	21.775	20.6609	21.5465	21.4872	21.4871	44.824	46.4173	39.7554	41.3898	41.142	41.2189	41.2188	41.7142	37.0208	33.4775	33.6006	34.3566	34.2164	34.2164	44.3993	38.723	39.7814	41.4557	41.3279	41.3173	41.0421	36.8415	34.8539	36.2297	37.1938	37.3838	37.4369	36.2652	41.4669	31.5046	32.2986	32.6445	33.4693	33.5266	33.5266
41.2502	35.9802	34.9535	35.192	35.8869	35.8319	35.832	31.0934	25.1014	22.4876	21.3253	22.2312	22.1677	22.1676	45.8664	44.4431	39.3276	41.5092	40.6196	40.7852	40.7851	42.6843	35.2359	33.2194	33.8232	34.0612	33.9811	33.9811	45.4319	43.5385	39.3263	41.5497	40.8691	40.9242	40.6209	37.6983	33.2704	35.8933	37.3244	37.0269	37.1442	35.9041	42.4313	29.7517	31.9234	32.8149	33.0294	33.1883	33.1884
42.1877	31.2801	34.6216	35.3648	35.6269	35.6282	35.6282	31.8	26.6161	23.1568	21.9654	22.8773	22.8108	22.8107	46.9088	41.8221	38.889	41.5719	40.0729	40.3231	40.323	43.6544	35.4434	32.9537	34.0093	33.7466	33.7258	33.7258	46.4644	43.977	38.8594	41.5854	40.3762	40.4953	40.1679	38.5551	35.8848	35.5482	37.4127	36.6464	36.8254	35.5293	43.3956	26.2692	31.5368	32.9321	32.5597	32.815	32.815
43.1252	30.9975	34.2763	35.4923	35.3324	35.389	35.389	32.5067	27.9317	23.7788	22.5778	23.4816	23.4131	23.4131	47.9512	41.3442	38.4401	41.5776	39.5055	39.8353	39.8352	44.6245	34.3645	32.6808	34.1582	33.4153	33.4521	33.4521	47.497	41.3227	38.3816	41.5627	39.8528	40.0336	39.6862	39.4119	38.1533	35.1947	37.4583	36.2448	36.4826	35.1425	44.36	30.0228	31.1392	32.9954	32.0647	32.4102	32.4103
44.0627	33.5352	33.9192	35.574	35.0064	35.1167	35.1167	33.2134	28.485	24.35	23.1593	24.0409	23.9718	23.9718	48.9937	42.2629	37.9813	41.5261	38.9207	39.3247	39.3246	45.5946	31.9358	32.4009	34.2694	33.0694	33.1617	33.1617	48.5295	39.4038	37.8936	41.4817	39.3026	39.5421	39.1786	40.2686	37.0971	34.8332	37.4611	35.8246	36.118	34.745	45.3243	31.196	30.7314	33.0044	31.5484	31.9774	31.9774
45.0002	34.6534	33.5515	35.6096	34.6516	34.8136	34.8137	33.92	27.8298	24.8673	23.7065	24.5525	24.4839	24.4839	50.0361	40.8358	37.5131	41.4178	38.3215	38.7937	38.7936	46.5647	28.9579	32.1141	34.3427	32.7109	32.8561	32.8561	49.5621	39.7752	37.396	41.3427	38.729	39.0237	38.6479	41.1254	35.0352	34.4643	37.421	35.388	35.7333	34.3382	46.2887	29.4336	30.3137	32.9592	31.0145	31.5195	31.5196
45.9377	33.2734	33.1742	35.599	34.2709	34.4821	34.4821	34.6267	27.1958	25.3282	24.2163	25.0141	24.9471	24.9471	51.0785	36.4431	37.036	41.253	37.7105	38.2447	38.2446	47.5348	28.5854	31.8208	34.3776	32.3414	32.5367	32.5367	50.5946	37.2107	36.8894	41.1464	38.135	38.4811	38.0964	41.9822	32.6037	34.0881	37.3382	34.9372	35.3304	33.9231	47.253	27.4367	29.8867	32.86	30.4662	31.0397	31.0397
46.8752	31.5208	32.7882	35.5423	33.8668	34.1243	34.1243	35.3334	24.9702	25.7305	24.6859	25.4234	25.3593	25.3593	52.1209	33.9749	36.5504	41.0325	37.0902	37.68	37.6799	48.5049	31.2349	31.5212	34.3742	31.9627	32.2049	32.2049	51.6271	34.5282	36.3744	40.8934	37.5235	37.9169	37.5267	42.839	33.0039	33.7051	37.213	34.4741	34.911	33.501	48.2174	28.1178	29.451	32.7073	29.9065	30.5405	30.5405
47.8127	33.6677	32.394	35.4395	33.4418	33.7423	33.7423	36.04	25.1434	26.0728	25.1124	25.7789	25.7188	25.7188	53.1633	35.7799	36.057	40.7572	36.4627	37.1015	37.1015	49.475	31.4868	31.2154	34.3324	31.5761	31.8619	31.8619	52.6597	31.794	35.8516	40.585	36.8974	37.3334	36.941	43.6958	33.8673	33.3155	37.0458	34.0006	34.4768	33.0728	49.1817	31.7928	29.0072	32.5017	29.3382	30.0246	30.0246
48.7502	35.1315	31.9923	35.2912	32.9982	33.3382	33.3382	36.7467	26.8774	26.354	25.4934	26.0793	26.0241	26.0241	54.2058	35.7363	35.5561	40.4281	35.8302	36.5113	36.5112	50.4451	31.3386	30.9038	34.2524	31.1831	31.5088	31.5088	53.6922	34.4596	35.3215	40.2224	36.259	36.733	36.3414	44.5525	33.9154	32.9198	36.8372	33.5182	34.0292	32.6395	50.1461	30.1325	28.5558	32.2444	28.7636	29.4943	29.4944
49.6877	34.2029	31.5836	35.0979	32.5381	32.9139	32.9139	37.4534	26.7511	26.5735	25.8265	26.3237	26.2744	26.2744	55.2482	32.4799	35.0483	40.0466	35.1943	35.9111	35.9111	51.4152	29.604	30.5865	34.1344	30.7848	31.1468	31.1467	54.7248	34.4555	34.7846	39.8071	35.6108	36.1178	35.7298	45.4093	32.5052	32.5182	36.5878	33.0285	33.5698	32.202	51.1104	28.7293	28.0974	31.9365	28.1849	28.9519	28.952
50.6252	31.6384	31.1684	34.8603	32.0636	32.4713	32.4713	38.16	26.1202	26.7315	26.1098	26.5116	26.4689	26.4689	56.2906	30.6601	34.534	39.6143	34.5568	35.3026	35.3025	52.3853	28.1855	30.2638	33.9788	30.3824	30.7767	30.7767	55.7573	34.8207	34.2416	39.3407	34.9548	35.49	35.1081	46.2661	30.3822	32.111	36.2986	32.533	33.0999	31.761	52.0748	26.3179	27.6325	31.5796	27.604	28.3994	28.3994
51.5627	30.3415	30.7471	34.5794	31.5768	32.0122	32.0122	38.8667	23.8371	26.8284	26.3415	26.6427	26.6074	26.6074	57.333	31.9291	34.0138	39.1328	33.9191	34.6874	34.6873	53.3554	29.7036	29.9359	33.7862	29.9769	30.3997	30.3997	56.7899	33.2829	33.6929	38.8252	34.293	34.8513	34.4781	47.1229	29.7032	31.6987	35.9705	32.0329	32.6208	31.3173	53.0391	26.4688	27.1617	31.1754	27.0226	27.8387	27.8387
52.5002	32.0057	30.3201	34.2563	31.0792	31.5384	31.5383	39.5734	22.8193	26.8651	26.5202	26.7173	26.69	26.69	58.3754	33.7435	33.4882	38.6041	33.2825	34.0668	34.0667	54.3255	29.9221	29.6032	33.5571	29.5691	30.0165	30.0165	57.8224	33.6341	33.1392	38.2627	33.6273	34.2038	33.8414	47.9797	29.4917	31.2816	35.6046	31.5294	32.1337	30.8715	54.0035	28.1511	26.6857	30.7258	26.4423	27.2716	27.2716
53.4377	33.3745	29.8879	33.8921	30.5728	31.0514	31.0513	40.2801	23.6303	26.843	26.6448	26.7361	26.7171	26.7171	59.4179	34.1111	32.9576	38.0303	32.6482	33.4423	33.4422	55.2956	29.4779	29.2657	33.2924	29.1599	29.628	29.6279	58.8549	36.9649	32.5809	37.6554	32.9593	33.549	33.1994	48.8364	29.2327	30.8599	35.2021	31.0237	31.6397	30.4244	54.9678	28.0757	26.2048	30.2329	25.8644	26.6997	26.6997
54.3752	31.4298	29.4509	33.4883	30.0589	30.5528	30.5527	40.9867	25.5358	26.7638	26.7145	26.6997	26.6895	26.6895	60.4603	32.6518	32.4226	37.4136	32.0172	32.815	32.8149	56.2657	26.2939	28.9239	32.9929	28.7501	29.2349	29.2349	59.8875	36.0231	32.0186	37.0057	32.2905	32.8885	32.5537	49.6932	28.1931	30.434	34.7644	30.5166	31.14	29.9765	55.9321	25.5862	25.7198	29.699	25.29	26.1245	26.1245
55.3127	29.2507	29.0094	33.0464	29.5392	30.0441	30.0441	41.6934	26.2057	26.6296	26.7289	26.6096	26.6082	26.6082	61.5027	30.7018	31.8836	36.7564	31.3904	32.1862	32.1861	57.2358	27.0444	28.5778	32.6595	28.3403	28.838	28.838	60.92	32.9693	31.4529	36.3161	31.6224	32.2239	31.9054	50.55	26.6014	30.0042	34.2928	30.0093	30.6356	29.5283	56.8965	23.9241	25.2311	29.1266	24.7203	25.5474	25.5474
56.2502	27.0696	28.5639	32.5679	29.0149	29.5267	29.5267	42.4001	26.4866	26.4428	26.6879	26.4672	26.4746	26.4746	62.5451	31.0314	31.3412	36.0611	30.7688	31.5569	31.5568	58.2059	29.5831	28.2279	32.2935	27.9311	28.4379	28.4379	61.9526	31.4782	30.8842	35.5894	30.9561	31.5565	31.2559	51.4068	27.221	29.5709	33.789	29.5023	30.1274	29.0803	57.8608	24.2758	24.7394	28.5183	24.1562	24.9697	24.9697
57.1877	27.8549	28.1148	32.0547	28.4873	29.002	29.0019	43.1067	25.1946	26.2061	26.5917	26.2743	26.2903	26.2903	63.5875	29.0533	30.7958	35.3304	30.1529	30.9281	30.928	59.176	28.7298	27.8742	31.8959	27.5231	28.0353	28.0353	62.9851	30.999	30.3131	34.8283	30.2929	30.8877	30.6062	52.2636	28.3651	29.1344	33.2545	28.9967	29.6162	28.633	58.8252	25.8076	24.2451	27.8768	23.5984	24.3925	24.3925
58.1252	28.4579	27.6624	31.5087	27.9577	28.4711	28.4711	43.8134	24.1227	25.9224	26.441	26.0328	26.0572	26.0573	64.6299	27.5679	30.2479	34.567	29.5436	30.3007	30.3006	60.1461	27.565	27.5171	31.468	27.1168	27.6308	27.6308	64.0177	29.848	29.7402	34.0356	29.6337	30.2186	29.9574	53.1203	30.3294	28.6951	32.691	28.4929	29.103	28.1868	59.7895	25.1872	23.7489	27.2049	23.0476	23.817	23.817
59.0628	26.5607	27.2072	30.9318	27.4269	27.9354	27.9354	44.5201	23.8267	25.5946	26.2367	25.7451	25.7775	25.7775	65.6724	27.7778	29.698	33.7737	28.9412	29.6755	29.6755	61.1162	25.7986	27.1568	31.0112	26.7126	27.2248	27.2248	65.0502	27.8143	29.1658	33.2142	28.9796	29.5504	29.3105	53.9771	30.2943	28.2532	32.1003	27.9917	28.5885	27.7421	60.7539	23.8777	23.2511	26.5056	22.5045	23.244	23.244
60.0003	25.4379	26.7495	30.326	26.8962	27.3959	27.3958	45.2267	24.3187	25.226	25.98	25.4136	25.4534	25.4535	66.7148	30.8796	29.1465	32.9533	28.3464	29.0533	29.0533	62.0863	26.582	26.7935	30.5269	26.3109	26.818	26.818	66.0827	26.309	28.5906	32.3672	28.3312	28.8841	28.6664	54.8339	29.3985	27.809	31.4842	27.4936	28.0735	27.2993	61.7182	21.5087	22.7524	25.7819	21.9695	22.6746	22.6746
60.9378	26.372	26.2897	29.6935	26.3663	26.8536	26.8536	45.9334	24.5569	24.8197	25.6726	25.0409	25.0875	25.0875	67.7572	31.4808	28.594	32.1086	27.7595	28.4349	28.4349	63.0564	27.7203	26.4275	30.0166	25.9121	26.4108	26.4107	67.1153	29.687	28.0149	31.4974	27.6894	28.2207	28.0258	55.6907	27.1273	27.363	30.8447	26.9991	27.5586	26.8587	62.6826	23.1513	22.2533	25.0367	21.443	22.1094	22.1094
61.8753	28.4435	25.8281	29.0364	25.8381	26.3096	26.3096	46.6401	24.8518	24.3792	25.3162	24.6297	24.6823	24.6824	68.7996	30.1968	28.0408	31.2427	27.1809	27.8208	27.8208	64.0265	26.9196	26.0591	29.4819	25.5164	26.0035	26.0035	68.1478	31.4425	27.4394	30.608	27.0549	27.5611	27.3896	56.5475	26.7826	26.9154	30.1835	26.5086	27.0445	26.4206	63.6469	24.1708	21.7543	24.2731	20.9255	21.5493	21.5493
62.8128	26.9916	25.3653	28.357	25.3123	25.7649	25.7648	47.3467	23.2876	23.9077	24.913	24.1829	24.2407	24.2407	69.842	27.347	27.4874	30.3584	26.6108	27.2117	27.2117	64.9966	25.7815	25.6885	28.9243	25.1242	25.5967	25.5967	69.1804	30.4171	26.8645	29.702	26.4281	26.9061	26.7583	57.4042	27.3837	26.4665	29.5028	26.0227	26.5317	25.9852	64.6113	24.9432	21.2558	23.4941	20.4171	20.995	20.995
63.7503	26.2371	24.9014	27.6576	24.7897	25.2201	25.2201	48.0534	21.6778	23.4084	24.4655	23.7033	23.7654	23.7654	70.8844	26.265	26.9342	29.4586	26.0496	26.6081	26.6081	65.9667	23.8146	25.3159	28.3457	24.7357	25.1908	25.1908	70.2129	27.9511	26.2906	28.7823	25.8097	26.2563	26.1327	58.261	26.9999	26.0167	28.8045	25.5416	26.0208	25.5529	65.5756	24.1186	20.7584	22.7027	19.9182	20.4469	20.4469
64.6878	23.9531	24.4369	26.9404	24.2709	24.6763	24.6763	48.7601	22.0682	22.8847	23.9762	23.194	23.2594	23.2595	71.9269	26.7795	26.3817	28.5463	25.4975	26.0105	26.0105	66.9368	25.2487	24.9416	27.7475	24.3511	24.786	24.786	71.2455	26.4073	25.7182	27.852	25.2001	25.6126	25.5134	59.1178	25.9203	25.5662	28.0905	25.0656	25.5124	25.1238	66.54	21.6194	20.2625	21.902	19.4288	19.9056	19.9056
65.6253	23.4317	23.9722	26.2078	23.7564	24.1341	24.1341	49.4667	22.7614	22.3396	23.448	22.658	22.7257	22.7257	72.9693	25.4771	25.8304	27.6242	24.9546	25.4193	25.4194	67.9069	24.6259	24.5658	27.1317	23.9707	24.3827	24.3827	72.278	26.8808	25.1477	26.9139	24.5996	24.9756	24.9007	59.9746	24.8293	25.1154	27.3629	24.5952	25.0069	24.6983	67.5043	21.3692	19.7686	21.0947	18.9492	19.3717	19.3717
66.5628	24.7467	23.5075	25.462	23.2468	23.5943	23.5942	50.1734	23.5855	21.7763	22.884	22.0982	22.1673	22.1673	74.0117	24.1003	25.2805	26.6952	24.4211	24.835	24.835	68.877	25.5596	24.1887	26.5	23.5945	23.9812	23.9812	73.3106	26.5262	24.5796	25.9709	24.0087	24.3457	24.2953	60.8314	25.4352	24.6645	26.6236	24.1304	24.5047	24.2764	68.4687	20.1993	19.277	20.2839	18.4795	18.8455	18.8455
67.5003	24.3566	23.0433	24.7053	22.7425	23.0574	23.0574	50.8801	23.3489	21.1977	22.2872	21.5177	21.587	21.587	75.0541	24.8403	24.7325	25.7621	23.897	24.2578	24.2579	69.8471	23.1836	23.8106	25.854	23.2227	23.5818	23.5818	74.3431	24.2468	24.0142	25.0257	23.4275	23.7236	23.6975	61.6881	27.1197	24.2138	25.8747	23.6715	24.0062	23.8583	69.433	18.2974	18.7883	19.4721	18.0196	18.3274	18.3274
68.4378	22.8686	22.5798	23.94	22.2439	22.5242	22.5241	51.5867	22.8681	20.6066	21.6611	20.9194	20.988	20.988	76.0965	28.0756	24.1868	24.8274	23.3824	23.6882	23.6882	70.8172	24.1559	23.4317	25.1956	22.8555	23.1848	23.1848	75.3756	22.9229	23.4521	24.0811	22.8564	23.1096	23.1077	62.5449	28.0878	23.7637	25.1181	23.2188	23.5119	23.4442	70.3974	16.0989	18.3029	18.6621	17.5696	17.8177	17.8177
69.3753	22.6123	22.1174	23.1683	21.7515	21.9951	21.995	52.2934	21.9261	20.0057	21.0089	20.3063	20.373	20.373	77.139	27.9779	23.6438	23.8938	22.8774	23.1263	23.1264	71.7873	27.0191	23.0522	24.5266	22.4929	22.7904	22.7904	76.4082	25.5406	22.8935	23.1396	22.2955	22.5043	22.5263	63.4017	27.2671	23.3144	24.3558	22.7723	23.022	23.0343	71.3617	14.6191	17.821	17.8564	17.1296	17.3167	17.3167
70.3128	22.2513	21.6564	22.3923	21.2655	21.4707	21.4706	53.0001	20.9567	19.3975	20.3341	19.6811	19.745	19.7451	78.1814	27.7483	23.1039	22.9638	22.382	22.5725	22.5726	72.7574	27.2663	22.6724	23.8487	22.135	22.3988	22.3988	77.4407	25.2399	22.3389	22.2037	21.7449	21.9078	21.9534	64.2585	25.3893	22.8661	23.5895	22.3322	22.5368	22.6287	72.3261	16.1575	17.3432	17.0574	16.6994	16.8247	16.8247
71.2503	23.1243	21.1971	21.6143	20.7861	20.9514	20.9514	53.7067	19.7298	18.7844	19.6402	19.0467	19.1068	19.1068	79.2238	24.2218	22.5673	22.0396	21.8962	22.027	22.027	73.7274	26.4145	22.2925	23.1636	21.782	22.0103	22.0103	78.4733	25.3052	21.7886	21.2757	21.2049	21.3207	21.3895	65.1153	23.5321	22.4192	22.8213	21.8986	22.0568	22.2275	73.2904	18.5791	16.8698	16.2674	16.279	16.3418	16.3418
72.1878	20.0551	20.7398	20.8362	20.3138	20.4377	20.4377	54.4134	20.0603	18.1686	18.9307	18.4055	18.461	18.461	80.2662	22.0802	22.0344	21.1236	21.4199	21.4899	21.49	74.6975	23.6629	21.9127	22.4731	21.4338	21.6249	21.6249	79.5058	22.9681	21.2429	20.3579	20.6754	20.7431	20.8347	65.972	24.2124	21.9739	22.0528	21.4717	21.582	21.8308	74.2547	19.4739	16.4011	15.4885	15.8684	15.8683	15.8682
73.1253	18.5745	20.2848	20.0601	19.8486	19.93	19.93	55.1201	19.1256	17.5522	18.2091	17.7603	17.8102	17.8102	81.3086	21.0677	21.5056	20.2179	20.9531	20.9614	20.9615	75.6676	22.3885	21.5331	21.7788	21.0905	21.243	21.243	80.5383	21.4311	20.7023	19.4524	20.1565	20.1753	20.2892	66.8288	24.2135	21.5304	21.2858	21.0514	21.1127	21.4387	75.2191	20.3637	15.9374	14.7227	15.4675	15.4041	15.4041
74.0628	16.1975	19.8325	19.2878	19.3908	19.4287	19.4286	55.8267	18.0416	16.937	17.4786	17.1132	17.1569	17.1569	82.351	20.0005	20.9812	19.3244	20.4958	20.4417	20.4418	76.6377	22.2074	21.1541	21.0824	20.7521	20.8646	20.8646	81.5709	20.6231	20.167	18.561	19.6483	19.6175	19.7532	67.6856	24.3616	21.0891	20.5221	20.6379	20.6492	21.0513	76.1834	19.2073	15.4791	13.9717	15.0761	14.9496	14.9496
75.0003	16.7217	19.3829	18.5211	18.9406	18.9339	18.9339	56.5334	16.4679	16.325	16.7427	16.4667	16.5033	16.5033	83.3935	19.4362	20.4615	18.4451	20.0478	19.9309	19.9309	77.6078	22.6678	20.7759	20.3855	20.4187	20.4899	20.4899	82.6034	21.1624	19.6372	17.6856	19.1507	19.07	19.2268	68.5424	22.8728	20.6501	19.763	20.2312	20.1917	20.6686	77.1478	18.2362	15.0265	13.2372	14.6942	14.5046	14.5046
75.9378	18.8657	18.9366	17.7619	18.4979	18.4461	18.4461	57.2401	14.7706	15.7175	16.0046	15.8228	15.8518	15.8518	84.4359	20.4451	19.9467	17.5816	19.6091	19.429	19.4291	78.5779	20.355	20.3985	19.6896	20.0903	20.119	20.119	83.636	19.7925	19.1134	16.8279	18.6637	18.5327	18.7102	69.3992	21.9825	20.2136	19.0103	19.8313	19.7402	20.2907	78.1121	16.0945	14.5799	12.5208	14.3215	14.0694	14.0693
76.8753	19.3235	18.4936	17.0116	18.063	17.9655	17.9655	57.9467	12.9984	15.1162	15.2673	15.1836	15.2044	15.2044	85.4783	23.0469	19.4372	16.7356	19.1797	18.9361	18.9362	79.548	20.7839	20.0223	18.9962	19.7668	19.7521	19.7521	84.6685	18.8667	18.5958	15.9892	18.1874	18.0059	18.2033	70.2559	22.7336	19.78	18.2654	19.4382	19.295	19.9177	79.0765	15.0296	14.1394	11.8236	13.9581	13.6438	13.6438
77.8128	20.3926	18.0542	16.2719	17.6359	17.4924	17.4924	58.6534	12.6784	14.5223	14.5337	14.5508	14.563	14.563	86.5207	22.7182	18.9331	15.9083	18.7593	18.4524	18.4525	80.5181	24.0749	19.6474	18.3068	19.4483	19.3892	19.3892	85.7011	20.8398	18.0847	15.1711	17.7216	17.4897	17.7063	71.1127	23.3682	19.3494	17.5296	19.0519	18.8562	19.5496	80.0408	12.157	13.7054	11.1469	13.6036	13.228	13.2279
78.7503	20.2766	17.6187	15.5442	17.2167	17.0268	17.0268	59.3601	13.131	13.937	13.8068	13.9262	13.9294	13.9294	87.5631	22.107	18.4349	15.1012	18.3479	17.9777	17.9778	81.4882	25.3977	19.274	17.6227	19.1347	19.0304	19.0305	86.7336	20.1247	17.5802	14.3746	17.2662	16.984	17.2193	71.9695	22.7043	18.922	16.8042	18.6724	18.4239	19.1865	81.0052	11.5574	13.2781	10.4917	13.2581	12.8218	12.8218
79.6878	21.6846	17.1874	14.8298	16.8054	16.5691	16.5691	60.0667	12.8157	13.3614	13.0891	13.3112	13.3051	13.3051	88.6056	19.5685	17.9426	14.3154	17.9454	17.5122	17.5123	82.4583	25.5085	18.9023	16.9452	18.8261	18.6759	18.6759	87.7662	19.4419	17.0826	13.6007	16.8212	16.489	16.7421	72.8263	22.4846	18.4981	16.0903	18.2997	17.9982	18.8283	81.9695	11.7746	12.8577	9.85878	12.9212	12.4253	12.4253
80.6253	21.6547	16.7603	14.1298	16.4021	16.1193	16.1193	60.7734	12.0494	12.7965	12.3829	12.7073	12.6918	12.6918	89.648	19.0858	17.4566	13.5519	17.5516	17.0559	17.056	83.4284	23.3712	18.5325	16.2756	18.5224	18.3257	18.3257	88.7987	17.3319	16.5922	12.8505	16.3864	16.0047	16.275	73.6831	20.3654	18.0778	15.3892	17.9337	17.5792	18.4751	82.9339	11.2743	12.4443	9.2488	12.5929	12.0384	12.0384
81.5629	19.8108	16.3377	13.4454	16.0067	15.6775	15.6775	61.4801	11.7363	12.243	11.6906	12.1157	12.0906	12.0906	90.6904	18.4226	16.977	12.8114	17.1664	16.6086	16.6087	84.3985	18.2922	18.1647	15.615	18.2235	17.9799	17.9799	89.8312	16.2175	16.1091	12.1246	15.9618	15.5311	15.8177	74.5398	18.6475	17.6613	14.7018	17.5745	17.167	18.1269	83.8982	11.8999	12.0383	8.66231	12.273	11.6611	11.6611
82.5004	19.2836	15.9199	12.7775	15.6192	15.244	15.244	62.1867	11.2854	11.7018	11.0141	11.5375	11.5029	11.5028	91.7328	18.2892	16.5041	12.0948	16.7898	16.1705	16.1706	85.3686	16.1621	17.7991	14.9645	17.9295	17.6385	17.6385	90.8638	14.4859	15.6336	11.4237	15.5472	15.068	15.3703	75.3966	18.1062	17.2488	14.029	17.2219	16.7615	17.7837	84.8626	11.1573	11.6396	8.09968	11.9613	11.2933	11.2932
83.4379	16.8197	15.507	12.127	15.2397	14.8187	14.8187	62.8934	10.4791	11.1733	10.3553	10.9737	10.9295	10.9295	92.7752	16.7664	16.0379	11.4026	16.4214	15.7415	15.7416	86.3387	15.9803	17.4359	14.325	17.6403	17.3016	17.3016	91.8963	14.3813	15.1657	10.7482	15.1425	14.6156	14.9329	76.2534	16.3014	16.8405	13.3718	16.8759	16.3629	17.4456	85.8269	9.99417	11.2486	7.56114	11.6577	10.9348	10.9348
84.3754	15.6045	15.0992	11.4948	14.868	14.4017	14.4017	63.6001	10.8525	10.6582	9.71566	10.4251	10.3715	10.3715	93.8177	16.6557	15.5788	10.7352	16.0612	15.3214	15.3215	87.3088	13.6717	17.0752	13.6976	17.3559	16.9692	16.9692	92.9289	11.9092	14.7057	10.0984	14.7476	14.1738	14.5052	77.1102	15.5978	16.4365	12.7307	16.5365	15.9712	17.1124	86.7913	9.99044	10.8652	7.04681	11.3619	10.5857	10.5856
85.3129	14.4261	14.6966	10.8813	14.5041	13.9931	13.9931	64.3067	10.8826	10.157	9.09669	9.8924	9.82963	9.82962	94.8601	16.1314	15.1268	10.0931	15.7091	14.9104	14.9105	88.2789	13.3841	16.7172	13.083	17.0762	16.6414	16.6414	93.9614	10.0534	14.2536	9.47457	14.3622	13.7425	14.0873	77.967	14.5341	16.037	12.1065	16.2036	15.5864	16.7843	87.7556	9.21705	10.4897	6.55667	11.0738	10.2457	10.2456
86.2504	15.5233	14.2994	10.2872	14.148	13.5929	13.593	65.0134	10.238	9.66988	8.4995	9.37615	9.30448	9.30446	95.9025	14.2245	14.6821	9.47631	15.3649	14.5082	14.5083	89.249	15.4486	16.362	12.4821	16.8012	16.3181	16.3181	94.994	10.7399	13.8097	8.87681	13.9863	13.3215	13.679	78.8237	12.9792	15.6421	11.4998	15.877	15.2086	16.4612	88.72	9.68196	10.1221	6.09061	10.7932	9.91476	9.91473
87.1879	12.1774	13.9078	9.71295	13.7996	13.2012	13.2012	65.7201	10.2683	9.19727	7.92505	8.87682	8.79658	8.79656	96.9449	13.1054	14.2448	8.88501	15.0285	14.1149	14.115	90.2191	16.7322	16.0097	11.8954	16.5307	15.9995	15.9995	96.0265	10.4902	13.374	8.3051	13.6197	12.911	13.2803	79.6805	12.0086	15.252	10.9109	15.5569	14.8376	16.1431	89.6843	8.71975	9.7625	5.64836	10.52	9.59278	9.59274
88.1254	10.5838	13.5219	9.15883	13.4588	12.8178	12.8178	66.4268	9.67295	8.73937	7.37413	8.39477	8.30634	8.30632	97.9873	10.0735	13.8151	8.31917	14.6997	13.7303	13.7304	91.1892	15.6878	15.6606	11.3237	16.2649	15.6854	15.6855	97.059	11.0919	12.9466	7.75929	13.2622	12.5106	12.8911	80.5373	11.3184	14.8668	10.3404	15.243	14.4735	15.8299	90.6486	7.4839	9.41097	5.22963	10.254	9.2796	9.27957
89.0629	10.3483	13.1418	8.62511	13.1256	12.4428	12.4429	67.1334	8.8159	8.29633	6.84729	7.93024	7.83405	7.83403	99.0297	7.97913	13.393	7.77867	14.3783	13.3544	13.3545	92.1593	14.8291	15.3147	10.7674	16.0036	15.3761	15.3761	98.0916	8.59627	12.5276	7.23917	12.9137	12.1203	12.5113	81.3941	10.952	14.4866	9.78851	14.9353	14.1164	15.5217	91.613	7.34801	9.06757	4.83398	9.99503	8.97509	8.97505
90.0004	8.52936	12.7676	8.11196	12.7998	12.0763	12.0763	67.8401	8.56795	7.86825	6.34491	7.48336	7.37989	7.37987	100.072	7.64706	12.9787	7.2633	14.0643	12.9871	12.9872	93.1294	8.80812	14.9722	10.227	15.7467	15.0713	15.0713	99.1241	7.78261	12.1172	6.74444	12.574	11.7401	12.1407	82.2508	10.6982	14.1116	9.25547	14.6336	13.7661	15.2185	92.5773	7.0035	8.73233	4.46092	9.74287	8.6791	8.67906
90.9379	8.40221	12.3994	7.61943	12.4814	11.718	11.718	68.5468	7.48248	7.45518	5.86721	7.05421	6.94396	6.94394	101.115	7.95899	12.5722	6.77277	13.7574	12.6282	12.6283	94.0995	8.04487	14.6331	9.7029	15.4942	14.7712	14.7712	100.157	7.02744	11.7152	6.2747	12.2429	11.3697	11.7794	83.1076	7.95915	13.7418	8.74145	14.338	13.4226	14.9201	93.5417	6.50759	8.40528	4.10988	9.49739	8.39148	8.39144
91.8754	6.88464	12.0374	7.14751	12.1703	11.3681	11.3681	69.2534	5.6527	7.05712	5.41424	6.64276	6.52626	6.52624	102.157	6.9408	12.1737	6.3067	13.4576	12.2776	12.2777	95.0696	8.98963	14.2977	9.19536	15.246	14.4757	14.4758	101.189	6.1971	11.3219	5.82947	11.9202	11.009	11.427	83.9644	6.7687	13.3774	8.24653	14.0484	13.086	14.6265	94.506	6.20854	8.08644	3.78025	9.25841	8.11208	8.11204
92.8129	5.7156	11.6816	6.69613	11.8663	11.0263	11.0263	69.9601	4.80033	6.674	4.98589	6.24891	6.12672	6.1267	103.199	5.60317	11.783	5.86463	13.1646	11.9353	11.9355	96.0397	8.59509	13.9659	8.70464	15.0022	14.1849	14.1849	102.222	5.12825	10.9372	5.40824	11.6058	10.6579	11.0835	84.8212	4.24549	13.0184	7.77074	13.7645	12.7561	14.3378	95.4704	4.82635	7.77581	3.47134	9.02578	7.84075	7.84071

## Sheet: WAT-196
spike_1							spike_2							spike_3							spike_4							spike_5							spike_6							spike_7							spike_8
Z-axis_1	Thickness-profile_1	skewed gaussian_1	gaussian_1	lognorm_1	gamma_1	chi2_1	Z-axis_2	Thickness-profile_2	skewed gaussian_2	gaussian_2	lognorm_2	gamma_2	chi2_2	Z-axis_3	Thickness-profile_3	skewed gaussian_3	gaussian_3	lognorm_3	gamma_3	chi2_3	Z-axis_4	Thickness-profile_4	skewed gaussian_4	gaussian_4	lognorm_4	gamma_4	chi2_4	Z-axis_5	Thickness-profile_5	skewed gaussian_5	gaussian_5	lognorm_5	gamma_5	chi2_5	Z-axis_6	Thickness-profile_6	skewed gaussian_6	gaussian_6	lognorm_6	gamma_6	chi2_6	Z-axis_7	Thickness-profile_7	skewed gaussian_7	gaussian_7	lognorm_7	gamma_7	chi2_7	Z-axis_8
0	3.25893	3.35452	17.2428	2.85263	0.106987	0.106839	0	3.48145	6.04737	15.9118	3.59513	0.152789	0.152768	0	5.46412	10.3415	12.6218	7.16819	5.51269	5.51264	0	2.6802	3.7391	8.99707	1.62407	0.273973	0.273934	0	2.87325	4.80327	17.1131	3.26992	0.152882	0.152827	0	0.91321	0.232834	5.77287	0.00416378	0	0	0	3.8696	4.28091	7.74369	1.73971	0.364557	0.364376	0
0.65395	6.83077	4.1565	18.6334	3.77909	0.406563	0.406261	0.728077	4.96647	7.09684	17.3319	4.55047	0.419673	0.419636	0.722385	5.69078	11.5166	13.8642	8.24122	6.50835	6.5083	0.677959	3.04497	4.40038	9.9877	2.09384	0.466554	0.466499	0.704788	4.90874	5.78707	18.5861	4.25174	0.467338	0.467237	0.507484	2.09768	0.314055	6.4005	0.0111402	0	0	0.671715	4.42098	4.90978	8.55024	2.17475	0.568748	0.568513	0.525505
1.3079	6.97111	5.11157	20.1047	4.90529	0.990384	0.989924	1.45616	5.30652	8.28977	18.8471	5.68393	0.898782	0.898726	1.44477	6.15048	12.7959	15.2019	9.43549	7.63597	7.63591	1.35592	3.73242	5.15772	11.0655	2.66756	0.749671	0.749599	1.40958	6.80451	6.93001	20.1517	5.43445	1.0455	1.04534	1.01498	2.34954	0.420151	7.08375	0.0264101	0	0	1.34343	4.9613	5.61379	9.42406	2.69301	0.85082	0.850525	1.05101
1.96185	5.24105	6.23924	21.6584	6.24949	1.91752	1.91692	2.18423	5.02128	9.6385	20.4602	7.012	1.64697	1.6469	2.16716	6.58918	14.185	16.639	10.7588	8.90509	8.90503	2.03388	4.08456	6.02109	12.2354	3.36019	1.14761	1.14752	2.11436	7.42782	8.24855	21.8124	6.83685	1.94937	1.94917	1.52247	2.84803	0.557515	7.82599	0.0566342	0	0	2.01514	4.36225	6.39915	10.3688	3.30473	1.22774	1.22739	1.57652
2.61581	4.73023	7.5593	23.2958	7.8272	3.22565	3.22493	2.91232	4.84886	11.1552	22.1741	8.54988	2.71195	2.71186	2.88955	6.5897	15.6892	18.1796	12.2186	10.3249	10.3248	2.71183	2.66052	7.00083	13.5022	4.1872	1.68612	1.68601	2.81915	6.45819	9.75907	23.5701	8.47555	3.22514	3.22491	2.02996	2.25837	0.733791	8.63061	0.111633	0	0	2.68686	3.10813	7.2722	11.388	4.02038	1.71714	1.71672	2.10202
3.26975	4.43138	9.09134	25.0178	9.65056	4.93427	4.93347	3.64039	5.06481	12.8516	23.9911	10.311	4.13081	4.13071	3.61194	6.49227	17.3136	19.8275	13.822	11.904	11.9039	3.38979	2.48332	8.10753	14.8707	5.16429	2.39161	2.39148	3.52394	6.51543	11.4774	25.4264	10.3644	4.90341	4.90314	2.53745	1.85598	0.958002	9.50102	0.204842	0	0	3.35857	2.12224	8.23931	12.4852	4.85047	2.33679	2.33631	2.62753
3.92371	6.0119	10.8542	26.8252	11.728	7.04789	7.04704	4.36847	6.62203	14.7387	25.9133	12.3066	5.9296	5.92948	4.33432	7.78838	19.063	21.5863	15.5757	13.6502	13.6501	4.06775	3.05632	9.35188	16.3455	6.30708	3.29022	3.29007	4.22873	5.67268	13.4184	27.3826	12.5138	7.00023	6.99995	3.04494	2.21803	1.24066	10.4406	0.353499	0	0	4.03028	2.57297	9.30682	13.6638	5.80541	3.10415	3.1036	3.15303
4.57766	7.54672	12.8652	28.7184	14.0639	9.5587	9.55785	5.09655	7.90143	16.8267	27.9425	14.5454	8.12347	8.12335	5.05671	9.01505	20.9418	23.4594	17.4855	15.5706	15.5705	4.74571	3.55677	10.7445	17.9311	7.63075	4.407	4.40684	4.93352	4.86308	15.5955	29.4396	14.9308	9.51871	9.51842	3.55243	2.55053	1.59385	11.4527	0.578486	0	0	4.702	3.29304	10.481	14.9273	6.89527	4.03581	4.03522	3.67854
5.23161	10.2721	15.1395	30.6971	16.6584	12.4491	12.4483	5.82463	8.19674	19.1245	30.0798	17.0335	10.7174	10.7173	5.7791	8.85991	22.9541	25.4497	19.5568	17.6711	17.6711	5.42367	3.95938	12.296	19.6317	9.14978	5.7651	5.76492	5.63831	4.96349	18.0204	31.5978	17.6183	12.4507	12.4504	4.05992	2.98356	2.03128	12.5405	0.903861	0	0	5.37371	3.77597	11.7679	16.2786	8.12962	5.14714	5.1465	4.20404
5.88556	12.5149	17.6896	32.761	19.5072	15.694	15.6932	6.55271	7.28075	21.6393	32.3262	19.7736	13.707	13.7069	6.50148	7.86211	25.1033	27.5598	21.7938	19.9566	19.9566	6.10163	5.48267	14.0164	21.451	10.8774	7.38493	7.38474	6.34309	7.454	20.7021	33.8568	20.575	15.7785	15.7782	4.56741	3.24204	2.56823	13.7072	1.35604	0.00224456	0.00224932	6.04543	4.06499	13.1734	17.7208	9.51731	6.45175	6.45108	4.72954
6.53951	13.3462	20.5242	34.9092	22.6022	19.2623	19.2616	7.28078	7.4436	24.3768	34.6819	22.7655	17.0797	17.0795	7.22387	8.9985	27.3923	29.7918	24.1999	22.4306	22.4306	6.77958	7.19789	15.9151	23.3926	12.8255	9.28369	9.28349	7.04788	10.9709	23.6469	36.2162	23.7957	19.4766	19.4764	5.07491	2.77542	3.22152	14.9558	1.9628	0.0708095	0.0708488	6.71714	4.55667	14.7029	19.2566	11.0662	7.96124	7.96054	5.25504
7.19347	13.7668	23.6479	37.1401	25.9309	23.1191	23.1185	8.00887	8.49269	27.3403	37.1467	26.0056	20.8157	20.8155	7.94626	10.1582	29.8233	32.1473	26.7774	25.0952	25.0952	7.45755	8.22921	18.001	25.4596	15.004	11.4748	11.4746	7.75267	14.7034	26.8577	38.6747	27.2709	23.5135	23.5133	5.5824	3.57407	4.0093	16.2891	2.75205	0.324853	0.324943	7.38886	5.76286	16.3614	20.8884	12.7832	9.68481	9.68409	5.78055
7.84741	15.1348	27.0601	39.4519	29.4775	27.2265	27.2259	8.73695	10.4269	30.5309	39.7197	29.487	24.8892	24.8891	8.66865	10.8069	32.3979	34.6274	29.5275	27.9509	27.9509	8.1355	7.49628	20.2818	27.6544	17.4207	13.9672	13.967	8.45746	17.0685	30.3335	41.2303	30.9874	27.8528	27.8526	6.08988	4.78571	4.95082	17.7097	3.75061	0.858795	0.85894	8.06057	6.95235	18.1532	22.6183	14.6738	11.6291	11.6284	6.30605
8.50137	18.7181	30.7553	41.8423	33.2229	31.545	31.5446	9.46502	12.2749	33.9471	42.3995	33.1996	29.2698	29.2698	9.39103	10.9826	35.1166	37.2324	32.45	30.9968	30.9967	8.81347	7.64813	22.764	29.979	20.0812	16.7658	16.7656	9.16224	17.4311	34.0693	43.8806	34.9281	32.4549	32.4547	6.59737	6.63645	6.06615	19.2199	4.9831	1.73946	1.73966	8.73229	7.38424	20.0822	24.4481	16.742	13.7979	13.7972	6.83156
9.15532	27.0553	34.722	44.3083	37.145	36.0348	36.0344	10.1931	15.6832	37.5846	45.184	37.1302	33.9232	33.9232	10.1134	12.6161	37.9793	39.9624	35.5434	34.2301	34.2301	9.49142	9.01539	25.4525	32.4348	22.9882	19.8705	19.8704	9.86703	19.2617	38.0559	46.6224	39.0728	37.2778	37.2777	7.10487	8.24341	7.37561	20.8218	6.47071	3.00962	3.00985	9.404	9.105	22.1513	26.379	18.9903	16.1923	16.1916	7.35706
9.80927	35.0281	38.9428	46.8464	41.2195	40.6557	40.6555	10.9212	19.062	41.4362	48.0703	41.2627	38.8123	38.8123	10.8358	14.0795	40.9849	42.8163	38.8047	37.6464	37.6464	10.1694	11.7394	28.3508	35.0225	26.1416	23.2769	23.2768	10.5718	24.8413	42.2794	49.4521	43.3983	42.2787	42.2786	7.61236	9.1887	8.89934	22.517	8.23035	4.69173	4.692	10.0757	10.7974	24.3625	28.412	21.4193	18.8103	18.8096	7.88257
10.4632	42.7225	43.3946	49.4526	45.4202	45.3689	45.3688	11.6493	27.0626	45.4916	51.055	45.5782	43.8982	43.8981	11.5582	17.101	44.131	45.7924	42.2298	41.2396	41.2396	10.8473	13.8135	31.4605	37.7418	29.5385	26.976	26.9759	11.2766	38.7412	46.7213	52.3649	47.8788	47.4143	47.4142	8.11985	8.82562	10.6566	24.307	10.274	6.79152	6.7918	10.7474	12.2764	26.717	30.5475	24.0281	21.6471	21.6465	8.40807
11.1172	49.1264	48.0484	52.1223	49.7196	50.1366	50.1366	12.3773	38.1024	49.7376	54.1338	50.0557	49.1409	49.1408	12.2806	32.4733	47.4146	48.8883	45.8127	45.0017	45.0016	11.5253	13.4516	34.7807	40.5919	33.1727	30.9543	30.9542	11.9814	54.9221	51.3589	55.3557	52.4868	52.6419	52.6419	8.62734	7.55722	12.6652	26.1925	12.6081	9.3011	9.30139	11.4191	13.2002	29.2149	32.7852	26.8137	24.6953	24.6948	8.93358
11.7711	56.3044	52.8699	54.8505	54.0892	54.9228	54.9228	13.1054	52.5886	54.1578	57.3018	54.6718	54.5002	54.5002	13.003	45.6021	50.8313	52.1008	49.5461	48.9231	48.9231	12.2033	14.0377	38.3088	43.571	37.0351	35.1947	35.1945	12.6862	67.3741	56.1649	58.4187	57.1929	57.9199	57.9199	9.13483	9.0186	14.9404	28.174	15.2335	12.2018	12.2021	12.0909	13.854	31.8549	35.1245	29.7711	27.9446	27.9442	9.45908
12.4251	62.6903	57.8204	57.6314	58.5003	59.6935	59.6937	13.8335	68.1456	58.7331	60.553	59.4017	59.9364	59.9364	13.7254	57.1799	54.3756	55.4257	53.4212	52.9927	52.9927	12.8812	20.3943	42.0396	46.6762	41.1136	39.6758	39.6757	13.391	76.5418	61.1086	61.547	61.9671	63.2084	63.2084	9.64232	11.9191	17.4948	30.2515	18.1455	15.4668	15.467	12.7626	15.8341	34.6348	37.564	32.8936	31.3824	31.3821	9.98459
13.079	69.9069	62.8573	60.4589	62.9243	64.4173	64.4175	14.5616	81.5822	63.4412	63.8811	64.2191	65.4102	65.4103	14.4478	69.0609	58.0409	58.8579	57.4277	57.1975	57.1975	13.5592	28.9839	45.9652	49.9038	45.3932	44.3735	44.3735	14.0958	86.862	66.1555	64.7335	66.7786	68.4694	68.4695	10.1498	14.8377	20.3369	32.4245	21.3335	19.0628	19.063	13.4343	19.352	37.551	40.1017	36.1726	34.9938	34.9935	10.5101
13.733	79.187	67.935	63.326	67.3329	69.0648	69.0651	15.2896	89.3715	68.2579	67.2788	69.0967	70.8843	70.8844	15.1701	78.0002	61.8195	62.3916	61.554	61.523	61.523	14.2371	40.898	50.0757	53.2493	49.856	49.2608	49.2608	14.8005	96.0785	71.2685	67.97	71.5965	73.6676	73.6677	10.6573	18.3511	23.4706	34.6916	24.7822	22.9523	22.9525	14.106	29.8732	40.5984	42.735	39.5977	38.7618	38.7615	11.0356
14.3869	86.8278	73.006	66.2257	71.6987	73.6094	73.6097	16.0177	94.3849	73.1561	70.738	74.0067	76.3227	76.3227	15.8925	86.9299	65.7024	66.0199	65.7869	65.9537	65.9537	14.9151	55.8417	54.358	56.7067	54.4818	54.3082	54.3082	15.5053	99.2163	76.4084	71.248	76.3903	78.7698	78.77	11.1648	20.9955	26.8949	37.0513	28.4714	27.0949	27.0951	14.7777	41.0838	43.7707	45.4604	43.1566	42.6677	42.6676	11.5611
15.0409	90.1017	78.0226	69.1501	75.9956	78.0271	78.0275	16.7458	101.311	78.1073	74.2499	78.9211	81.6914	81.6914	16.6149	93.9613	69.6795	69.735	70.1122	70.4723	70.4723	15.5931	70.2551	58.7969	60.2693	59.2478	59.4843	59.4844	16.2101	97.0802	81.5345	74.558	81.1303	83.7461	83.7463	11.6723	22.2463	30.6028	39.501	32.377	31.4486	31.4488	15.4494	49.2581	47.0602	48.2739	46.8356	46.6914	46.6914	12.0866
15.6948	96.1376	82.9374	72.091	80.1987	82.2963	82.2967	17.4739	107.271	83.0811	77.8051	83.8119	86.9588	86.9589	17.3373	94.7013	73.7395	73.5283	74.5142	75.0608	75.0608	16.271	81.3786	63.3745	63.929	64.1295	64.7567	64.7567	16.9149	99.2235	86.6057	77.8901	85.7879	88.5691	88.5693	12.1798	24.4136	34.5815	42.0376	36.4715	35.9707	35.9708	16.1211	55.4072	50.458	51.1708	50.6195	50.8117	50.8117	12.6121
16.3488	101.5	87.7045	75.0396	84.2848	86.3981	86.3985	18.202	113.021	88.0463	81.3934	88.6516	92.0959	92.0959	18.0597	95.1869	77.8702	77.39	78.9764	79.6999	79.6999	16.949	89.5985	68.0706	67.6769	69.1005	70.0917	70.0918	17.6197	102.664	91.581	81.2338	90.3357	93.2144	93.2146	12.6873	28.9891	38.8119	44.6577	40.7248	40.6192	40.6193	16.7929	62.7992	53.9534	54.1453	54.4917	55.0062	55.0064	13.1376
17.0027	104.494	92.2814	77.9871	88.2328	90.316	90.3165	18.93	114.782	92.971	85.0039	93.4135	97.0758	97.0759	18.7821	100.26	82.058	81.3098	83.4811	84.3697	84.3697	17.6269	94.3802	72.8629	71.503	74.1332	75.4557	75.4558	18.3245	110.937	96.4204	84.5781	94.7484	97.6604	97.6606	13.1948	35.2624	43.2687	47.3565	45.1049	45.3528	45.3528	17.4646	70.8562	57.5348	57.1911	58.4346	59.2523	59.2525	13.6631
17.6567	104.204	96.6288	80.9238	92.0232	94.0361	94.0366	19.6581	121.16	97.8231	88.6253	98.0718	101.875	101.875	19.5045	103.35	86.2888	85.2763	88.01	89.0497	89.0497	18.3049	99.9003	77.7268	75.396	79.1989	80.8148	80.8149	19.0293	116.69	101.086	87.9115	99.0021	101.889	101.889	13.7022	46.2093	47.9209	50.1291	49.5786	50.1319	50.1319	18.1363	76.916	61.1892	60.3013	62.4296	63.5267	63.527	14.1886
18.3106	102.963	100.712	83.8401	95.6388	97.5465	97.547	20.3862	126.781	102.571	92.2455	102.602	106.471	106.471	20.2268	105.412	90.5473	89.2773	92.5439	93.7187	93.7188	18.9828	107.81	82.6365	79.3439	84.2683	86.1357	86.1358	19.7341	117.413	105.543	91.222	103.075	105.883	105.883	14.2097	58.2559	52.732	52.9697	54.112	54.919	54.919	18.808	81.6015	64.9025	63.4678	66.4575	67.8062	67.8066	14.7141
18.9646	103.5	104.503	86.726	99.0643	100.838	100.838	21.1143	121.164	107.184	95.8521	106.981	110.847	110.847	20.9492	112.317	94.8174	93.2999	97.0633	98.3557	98.3558	19.6608	113.526	87.5643	83.3335	89.3119	91.3861	91.3862	20.4389	113.532	109.758	94.4975	106.949	109.63	109.631	14.7172	68.3129	57.6609	55.8715	58.6713	59.6788	59.6788	19.4797	83.0464	68.6594	66.6823	70.4984	72.0679	72.0683	15.2396
19.6185	106.514	107.978	89.5713	102.287	103.902	103.903	21.8424	122.087	111.632	99.4322	111.189	114.985	114.985	21.6716	119.588	99.0823	97.3304	101.548	102.939	102.939	20.3388	114.491	92.4815	87.3507	94.3002	96.5345	96.5347	21.1436	116.317	113.703	97.7254	110.605	113.12	113.12	15.2247	76.5603	62.6625	58.8274	63.2234	64.3786	64.3786	20.1514	88.5515	72.4439	69.9353	74.5322	76.2892	76.2897	15.7651
20.2725	107.886	111.118	92.3655	105.295	106.735	106.735	22.5704	121.882	115.888	102.972	115.204	118.872	118.872	22.394	121.819	103.325	101.355	105.978	107.448	107.448	21.0167	116.582	97.3589	91.3806	99.2042	101.552	101.552	21.8484	117.149	117.354	100.893	114.029	116.344	116.344	15.7322	82.3849	67.6895	61.8295	67.7364	68.9886	68.9886	20.8231	96.2823	76.239	73.2171	78.5388	80.4481	80.4486	16.2906
20.9264	107.328	113.914	95.0984	108.08	109.331	109.331	23.2985	127.318	119.927	106.459	119.01	122.498	122.498	23.1164	121.918	107.527	105.357	110.334	111.861	111.861	21.6947	123.293	102.167	95.4074	103.996	106.409	106.409	22.5532	109.195	120.692	103.988	117.209	119.297	119.297	16.2397	87.2225	72.6928	64.8692	72.1796	73.4816	73.4815	21.4949	97.7926	80.0271	76.5169	82.4979	84.5236	84.5242	16.8162
21.5804	108.22	116.359	97.7593	110.636	111.689	111.69	24.0266	125.947	123.724	109.879	122.592	125.853	125.853	23.8388	123.268	111.671	109.324	114.595	116.158	116.158	22.3726	126.378	106.875	99.4148	108.647	111.081	111.081	23.258	110.028	123.701	106.996	120.134	121.973	121.974	16.7472	91.8	77.6232	67.9372	76.5246	77.8332	77.8331	22.1666	100.656	83.7903	79.8238	86.3899	88.4956	88.4962	17.3417
22.2343	112.408	118.453	100.338	112.957	113.809	113.81	24.7547	121.42	127.26	113.218	125.935	128.931	128.931	24.5612	128.029	115.738	113.238	118.741	120.319	120.319	23.0506	117.726	111.455	103.386	113.133	115.544	115.544	23.9628	112.87	126.37	109.906	122.797	124.373	124.373	17.2547	94.1495	82.4325	71.0237	80.7448	82.022	82.0219	22.8383	103.093	87.5102	83.1259	90.1954	92.3451	92.3457	17.8672
22.8883	113.781	120.202	102.824	115.04	115.691	115.692	25.4827	121.605	130.516	116.462	129.028	131.727	131.727	25.2836	127.526	119.71	117.083	122.753	124.325	124.325	23.7285	116.047	115.877	107.303	117.43	119.776	119.776	24.6676	112.303	128.694	112.705	125.191	126.495	126.495	17.7622	95.3547	87.0746	74.1183	84.816	86.0291	86.029	23.51	104.083	91.1683	86.4112	93.8959	96.0546	96.0552	18.3927
23.5422	117.236	121.614	105.207	116.883	117.338	117.338	26.2108	123.611	133.48	119.598	131.862	134.239	134.239	26.0059	131.114	123.568	120.845	126.614	128.158	128.158	24.4065	119.032	120.115	111.148	121.513	123.758	123.759	25.3724	115.284	130.671	115.379	127.314	128.342	128.342	18.2697	92.1659	91.507	77.21	88.7165	89.8385	89.8384	24.1817	106.511	94.7462	89.6672	97.4736	99.6077	99.6083	18.9182
24.1962	116.688	122.703	107.477	118.487	118.752	118.752	26.9389	123.049	136.14	122.612	134.43	136.466	136.466	26.7283	135.515	127.296	124.505	130.304	131.801	131.801	25.0845	116.774	124.143	114.904	125.364	127.474	127.474	26.0771	121.453	132.305	117.918	129.163	129.917	129.917	18.7772	90.2232	95.6917	80.2875	92.4274	93.4368	93.4367	24.8534	108.338	98.2258	92.8809	100.912	102.99	102.99	19.4437
24.8502	114.204	123.485	109.625	119.854	119.938	119.938	27.667	124.339	138.487	125.489	136.726	138.41	138.41	27.4507	134.782	130.874	128.048	133.808	135.239	135.239	25.7624	118.36	127.936	118.552	128.964	130.909	130.91	26.7819	124.504	133.6	120.31	130.739	131.223	131.223	19.2846	91.5005	99.5955	83.3392	95.9321	96.8128	96.8127	25.5252	109.982	101.589	96.0392	104.195	106.187	106.188	19.9692
25.5041	115.231	123.978	111.642	120.986	120.9	120.901	28.3951	128.127	140.518	128.219	138.747	140.072	140.073	28.1731	134.174	134.286	131.458	137.11	138.457	138.457	26.4404	126.651	131.473	122.073	132.297	134.052	134.053	27.4867	126.522	134.568	122.542	132.044	132.268	132.268	19.7921	95.2354	103.191	86.3529	99.2168	99.9579	99.9577	26.1969	112.456	104.82	99.1289	107.308	109.189	109.189	20.4947
26.1581	116.772	124.203	113.518	121.888	121.646	121.646	29.1231	132.791	142.23	130.787	140.491	141.458	141.458	28.8955	131.855	137.516	134.718	140.194	141.442	141.442	27.1183	128.566	134.735	125.451	135.348	136.894	136.894	28.1915	131.293	135.221	124.606	133.081	133.057	133.057	20.2996	99.648	106.458	89.3164	102.27	102.865	102.865	26.8686	115.104	107.901	102.137	110.238	111.984	111.984	21.0202
26.812	110.777	124.181	115.246	122.565	122.182	122.182	29.8512	131.602	143.625	133.183	141.958	142.571	142.571	29.6179	132.557	140.547	137.814	143.048	144.182	144.182	27.7963	129.375	137.703	128.668	138.107	139.427	139.427	28.8963	130.904	135.572	126.49	133.855	133.598	133.598	20.8071	105.773	109.381	92.2171	105.083	105.531	105.531	27.5403	114.531	110.817	105.049	112.975	114.564	114.565	21.5457
27.466	111.302	123.932	116.817	123.023	122.513	122.513	30.5793	131.696	144.707	135.394	143.151	143.419	143.419	30.3403	136.577	143.366	140.731	145.661	146.668	146.668	28.4743	134.606	140.365	131.706	140.564	141.647	141.647	29.6011	128.418	135.64	128.187	134.373	133.901	133.901	21.3146	112.184	111.951	95.0426	107.649	107.951	107.951	28.212	112.102	113.554	107.853	115.506	116.923	116.924	22.0712
28.1199	113.389	123.479	118.226	123.269	122.65	122.65	31.3074	133.135	145.483	137.411	144.072	144.009	144.009	31.0627	137.066	145.96	143.454	148.021	148.89	148.89	29.1522	143.429	142.709	134.55	142.712	143.551	143.552	30.3059	123.577	135.441	129.687	134.642	133.973	133.973	21.8221	118.62	114.166	97.7804	109.965	110.126	110.126	28.8837	113.854	116.098	110.536	117.824	119.055	119.055	22.5967
28.7739	112.349	122.842	119.464	123.311	122.598	122.598	32.0355	129.593	145.96	139.222	144.726	144.348	144.348	31.785	142.893	148.314	145.97	150.119	150.843	150.843	29.8302	139.677	144.726	137.183	144.548	145.141	145.141	31.0107	123.97	134.994	130.983	134.67	133.824	133.824	22.3296	120.332	116.029	100.418	112.027	112.056	112.056	29.5554	112.479	118.439	113.084	119.921	120.955	120.955	23.1222
29.4278	111.91	122.04	120.527	123.158	122.367	122.367	32.7635	132.021	146.15	140.821	145.119	144.446	144.446	32.5074	138.213	150.42	148.266	151.949	152.521	152.521	30.5081	134.486	146.411	139.592	146.068	146.416	146.416	31.7155	124.313	134.319	132.068	134.466	133.466	133.466	22.8371	120.447	117.548	102.943	113.835	113.742	113.742	30.2272	114.891	120.566	115.486	121.791	122.622	122.622	23.6477
30.0818	112.234	121.093	121.41	122.818	121.966	121.966	33.4916	131.4	146.065	142.198	145.258	144.312	144.312	33.2298	138.452	152.266	150.33	153.505	153.921	153.921	31.1861	138.992	147.761	141.761	147.272	147.381	147.381	32.4202	123.272	133.434	132.938	134.041	132.908	132.908	23.3446	117.734	118.735	105.344	115.392	115.189	115.189	30.8989	113.823	122.47	117.731	123.431	124.054	124.054	24.1732
30.7357	113.23	120.016	122.108	122.3	121.402	121.402	34.2197	129.949	145.717	143.347	145.152	143.956	143.956	33.9522	138.493	153.846	152.152	154.782	155.04	155.04	31.8641	138.33	148.776	143.681	148.164	148.041	148.041	33.125	123.583	132.359	133.588	133.406	132.16	132.16	23.8521	113.045	119.605	107.609	116.7	116.399	116.399	31.5706	112.686	124.144	119.806	124.837	125.252	125.252	24.6987
31.3897	112.71	118.826	122.619	121.614	120.686	120.686	34.9478	131.102	145.123	144.263	144.808	143.389	143.389	34.6746	140.01	155.152	153.723	155.779	155.877	155.877	32.542	136.693	149.459	145.338	148.745	148.403	148.403	33.8298	124.79	131.111	134.015	132.57	131.234	131.234	24.3596	111.75	120.177	109.728	117.763	117.38	117.38	32.2423	112.433	125.583	121.701	126.008	126.216	126.217	25.2242
32.0436	107.392	117.537	122.94	120.77	119.825	119.825	35.6758	128.143	144.297	144.94	144.238	142.621	142.621	35.397	146.457	156.179	155.033	156.493	156.435	156.435	33.22	135.945	149.815	146.724	149.023	148.475	148.475	34.5346	125.334	129.709	134.216	131.547	130.141	130.141	24.867	108.421	120.47	111.688	118.587	118.137	118.137	32.914	114.129	126.782	123.408	126.943	126.951	126.951	25.7497
32.6976	109.661	116.161	123.07	119.777	118.829	118.828	36.4039	129.249	143.254	145.375	143.451	141.664	141.664	36.1194	151.282	156.924	156.077	156.926	156.715	156.715	33.8979	136.976	149.851	147.83	149.004	148.266	148.266	35.2394	121.764	128.169	134.19	130.346	128.891	128.891	25.3745	107.129	120.507	113.482	119.18	118.676	118.676	33.5857	112.375	127.74	124.916	127.646	127.459	127.459	26.2752
33.3515	106.843	114.709	123.007	118.645	117.706	117.706	37.132	125.746	142.011	145.566	142.458	140.527	140.527	36.8418	150.227	157.386	156.849	157.08	156.722	156.722	34.5759	137.032	149.577	148.65	148.697	147.787	147.787	35.9442	121.541	126.506	133.939	128.981	127.496	127.496	25.882	107.691	120.309	115.099	119.549	119.006	119.006	34.2574	115.855	128.455	126.219	128.116	127.745	127.745	26.8007
34.0055	107.16	113.192	122.753	117.384	116.465	116.465	37.8601	128.036	140.583	145.513	141.271	139.224	139.223	37.5641	148.934	157.563	157.344	156.957	156.459	156.459	35.2538	135.753	149.003	149.179	148.113	147.049	147.049	36.649	121.274	124.735	133.462	127.463	125.966	125.966	26.3895	109.78	119.899	116.531	119.702	119.135	119.135	34.9291	117.226	128.928	127.309	128.36	127.814	127.814	27.3262
34.6594	104.806	111.618	122.308	116.005	115.116	115.115	38.5882	133.379	138.987	145.214	139.9	137.763	137.763	38.2865	152.194	157.457	157.56	156.564	155.935	155.935	35.9318	138.268	148.144	149.415	147.261	146.065	146.064	37.3538	122.618	122.869	132.762	125.803	124.311	124.311	26.897	112.951	119.297	117.772	119.649	119.071	119.071	35.6009	115.858	129.162	128.181	128.38	127.674	127.674	27.8518
35.3134	104.004	109.994	121.674	114.516	113.665	113.665	39.3162	137.058	137.238	144.673	138.359	136.158	136.158	39.0089	144.982	157.072	157.496	155.906	155.156	155.156	36.6098	140.163	147.014	149.354	146.156	144.846	144.846	38.0585	119.991	120.921	131.843	124.015	122.543	122.543	27.4045	114.228	118.524	118.813	119.399	118.823	118.823	36.2726	116.78	129.161	128.831	128.184	127.331	127.331	28.3773
35.9673	103.788	108.328	120.855	112.926	112.123	112.123	40.0443	136.001	135.35	143.891	136.658	134.418	134.418	39.7313	146.04	156.411	157.152	154.991	154.131	154.131	37.2877	138.701	145.626	148.999	144.809	143.408	143.408	38.7633	119.75	118.9	130.71	122.108	120.672	120.672	27.912	113.421	117.599	119.651	118.963	118.4	118.4	36.9443	118.055	128.929	129.254	127.777	126.793	126.793	28.9028
36.6213	98.6253	106.624	119.854	111.246	110.496	110.496	40.7724	133.115	133.338	142.873	134.81	132.555	132.555	40.4537	150.243	155.48	156.531	153.827	152.869	152.869	37.9657	136.844	143.999	148.351	143.234	141.763	141.763	39.4681	115.279	116.818	129.367	120.095	118.706	118.706	28.4195	110.884	116.541	120.28	118.351	117.811	117.811	37.616	119.011	128.473	129.448	127.168	126.068	126.068	29.4283
37.2752	101.602	104.888	118.676	109.484	108.793	108.793	41.5005	130.676	131.216	141.623	132.827	130.578	130.578	41.1761	148.976	154.287	155.634	152.424	151.38	151.38	38.6436	139.066	142.149	147.414	141.446	139.926	139.926	40.1729	112.254	114.684	127.823	117.986	116.657	116.657	28.927	110.964	115.365	120.697	117.574	117.067	117.067	38.2877	111.398	127.8	129.414	126.363	125.165	125.165	29.9538
37.9292	113.302	103.124	117.326	107.649	107.021	107.021	42.2286	129.61	128.996	140.148	130.721	128.5	128.5	41.8985	147.19	152.84	154.468	150.791	149.677	149.676	39.3216	136.894	140.093	146.193	139.461	137.91	137.91	40.8777	108.342	112.505	126.083	115.792	114.533	114.533	29.4345	107.806	114.087	120.9	116.642	116.175	116.176	38.9594	113.938	126.918	129.149	125.373	124.093	124.093	30.4793
38.5831	117.322	101.337	115.811	105.749	105.187	105.187	42.9566	133.341	126.691	138.455	128.502	126.328	126.328	42.6209	144.88	151.149	153.038	148.941	147.769	147.769	39.9996	133.85	137.848	144.696	137.291	135.73	135.73	41.5825	107.269	110.289	124.158	113.524	112.343	112.343	29.9419	106.642	112.72	120.888	115.566	115.147	115.147	39.6312	116.605	125.837	128.657	124.206	122.862	122.862	31.0048
39.2371	117.474	99.5289	114.137	103.792	103.3	103.299	43.6847	131.595	124.312	136.552	126.183	124.074	124.074	43.3432	136.184	149.224	151.351	146.886	145.67	145.67	40.6775	127.198	135.432	142.931	134.954	133.401	133.401	42.2873	109.819	108.042	122.056	111.192	110.096	110.096	30.4494	104.313	111.275	120.661	114.357	113.991	113.991	40.3029	112.663	124.567	127.94	122.873	121.481	121.48	31.5303
39.891	121.732	97.7038	112.311	101.786	101.364	101.364	44.4128	130.194	121.869	134.449	123.774	121.747	121.747	44.0656	136.008	147.077	149.417	144.637	143.392	143.392	41.3555	126.137	132.862	140.908	132.464	130.936	130.936	42.9921	111.949	105.771	119.786	108.804	107.8	107.8	30.9569	102.087	109.763	120.219	113.025	112.716	112.716	40.9746	119.176	123.119	127.001	121.382	119.96	119.959	32.0558
40.545	113.632	95.8642	110.342	99.7388	99.3874	99.3871	45.1409	130.744	119.373	132.156	121.287	119.356	119.356	44.788	134.713	144.721	147.246	142.208	140.948	140.948	42.0334	129.41	130.156	138.64	129.836	128.349	128.349	43.6968	115.467	103.481	117.361	106.371	105.463	105.463	31.4644	104.521	108.193	119.567	111.581	111.331	111.331	41.6463	128.844	121.503	125.845	119.745	118.308	118.308	32.5813
41.1989	109.757	94.0129	108.239	97.6566	97.376	97.3757	45.8689	127.83	116.832	129.683	118.732	116.91	116.909	45.5104	139.914	142.169	144.848	139.613	138.351	138.35	42.7114	133.571	127.329	136.138	127.086	125.654	125.653	44.4016	115.19	101.176	114.79	103.901	103.092	103.092	31.9719	106.193	106.572	118.706	110.034	109.846	109.846	42.318	128.063	119.73	124.479	117.972	116.536	116.536	33.1068
41.8529	106.176	92.1522	106.01	95.5464	95.3355	95.3352	46.597	124.204	114.255	127.043	116.119	114.416	114.416	46.2328	141.535	139.435	142.236	136.865	135.614	135.614	43.3893	134.01	124.399	133.417	124.227	122.863	122.863	45.1064	115.585	98.8609	112.087	101.401	100.695	100.694	32.4794	107.337	104.908	117.642	108.395	108.269	108.269	42.9897	117.276	117.814	122.91	116.074	114.654	114.654	33.6323
42.5068	101.341	90.2844	103.665	93.4143	93.2717	93.2714	47.3251	120.414	111.65	124.247	113.457	111.884	111.884	46.9552	136.235	136.533	139.423	133.977	132.751	132.751	44.0673	132.648	121.379	130.493	121.274	119.991	119.991	45.8112	118.154	96.54	109.262	98.8813	98.2773	98.2772	32.9869	105.075	103.206	116.379	106.673	106.608	106.608	43.6614	118.25	115.765	121.145	114.061	112.671	112.671	34.1578
43.1608	100.357	88.4117	101.214	91.2664	91.1898	91.1895	48.0532	117.805	109.023	121.308	110.756	109.32	109.32	47.6776	129.071	133.479	136.423	130.964	129.775	129.775	44.7453	129.005	118.285	127.38	118.242	117.05	117.05	46.516	117.459	94.2168	106.329	96.3472	95.8465	95.8464	33.4944	106.352	101.472	114.926	104.876	104.873	104.873	44.3332	117.859	113.595	119.194	111.944	110.597	110.597	34.6833
43.8147	104.307	86.5361	98.6662	89.1081	89.0949	89.0946	48.7813	122.987	106.381	118.239	108.025	106.732	106.732	48.4	135.272	130.287	133.25	127.841	126.699	126.699	45.4232	127.351	115.131	124.095	115.144	114.051	114.05	47.2208	110.385	91.8948	103.3	93.8063	93.4082	93.4081	34.0019	105.376	99.7102	113.289	103.015	103.07	103.07	45.0049	110.914	111.317	117.067	109.733	108.442	108.441	35.2088
44.4687	101.988	84.6595	96.0327	86.9447	86.9917	86.9915	49.5093	126.099	103.73	115.054	105.271	104.127	104.127	49.1223	135.607	126.973	129.919	124.619	123.537	123.537	46.1012	124.69	111.93	120.657	111.992	111.005	111.005	47.9256	109.966	89.5771	100.188	91.2647	90.9678	90.9677	34.5094	103.534	97.9247	111.476	101.097	101.207	101.207	45.6766	110.262	108.943	114.773	107.439	106.214	106.213	35.7343
45.1226	95.3955	82.784	93.3237	84.781	84.8847	84.8845	50.2374	115.695	101.075	111.767	102.503	101.511	101.511	49.8447	132.803	123.551	126.446	121.315	120.301	120.301	46.7791	122.498	108.694	117.082	108.799	107.925	107.925	48.6304	103.636	87.2666	97.0057	88.7285	88.5306	88.5305	35.0169	101.626	96.1191	109.497	99.1298	99.2924	99.2925	46.3483	104.931	106.483	112.325	105.072	103.923	103.922	36.2598
45.7766	96.6174	80.9112	90.5496	82.6215	82.778	82.7779	50.9655	105.608	98.4214	108.391	99.7275	98.8899	98.8899	50.5671	131.835	120.038	122.848	117.939	117.003	117.003	47.4571	114.672	105.435	113.388	105.577	104.82	104.82	49.3352	98.4241	84.9662	93.766	86.2032	86.1014	86.1013	35.5243	100.165	94.2967	107.362	97.1217	97.3325	97.3325	47.02	100.322	103.95	109.735	102.641	101.577	101.577	36.7853
46.4305	90.8591	79.043	87.7209	80.4703	80.6757	80.6755	51.6936	104.053	95.7738	104.94	96.9522	96.27	96.27	51.2895	127.364	116.448	119.14	114.507	113.655	113.655	48.1351	107.477	102.163	109.593	102.337	101.7	101.699	50.0399	92.6573	82.6785	90.4816	83.6938	83.6847	83.6846	36.0318	96.0433	92.4602	105.081	95.0797	95.3339	95.334	47.6917	99.6272	101.353	107.014	100.157	99.1853	99.1849	37.3108
47.0845	89.0006	77.181	84.848	78.3313	78.5812	78.581	52.4217	108.258	93.1362	101.428	94.1832	93.6563	93.6563	52.0119	134.865	112.795	115.338	111.03	110.27	110.27	48.813	105.238	98.8887	105.717	99.0892	98.5737	98.5736	50.7447	91.2116	80.4058	87.1648	81.2049	81.2847	81.2846	36.5393	95.8303	90.6125	102.665	93.0105	93.3032	93.3033	48.3634	104.149	98.7047	104.176	97.6285	96.7555	96.7552	37.8363
47.7384	86.5589	75.3268	81.9411	76.2081	76.498	76.4978	53.1497	112.811	90.5126	97.8683	91.4266	91.0538	91.0538	52.7343	128.28	109.094	111.459	107.521	106.858	106.858	49.491	104.323	95.6208	101.776	95.8437	95.4508	95.4507	51.4495	91.7282	78.1504	83.828	78.7408	78.9052	78.9051	37.0468	98.7337	88.7561	100.127	90.9207	91.2465	91.2466	49.0352	108.639	96.0142	101.233	95.0642	94.2956	94.2953	38.3618
48.3924	86.3179	73.482	79.0104	74.1038	74.4291	74.429	53.8778	115.002	87.9065	94.2751	88.6877	88.467	88.467	53.4567	122.452	105.36	107.519	103.992	103.431	103.431	50.1689	104.919	92.3679	97.7877	92.6096	92.3388	92.3388	52.1543	93.6442	75.9146	80.4828	76.3054	76.5496	76.5496	37.5543	94.4902	86.8934	97.477	88.8161	89.1695	89.1695	49.7069	112.318	93.2914	98.1988	92.4729	91.8129	91.8126	38.8874
49.0463	80.9571	71.6482	76.0656	72.0215	72.3776	72.3775	54.6059	108.352	85.3211	90.6609	85.9717	85.9001	85.9001	54.1791	119.135	101.605	103.534	100.453	99.9977	99.9977	50.8469	102.076	89.1376	93.7704	89.3953	89.2454	89.2453	52.8591	89.6482	73.7004	77.1408	73.902	74.2213	74.2213	38.0618	91.8421	85.0265	94.7287	86.7023	87.0775	87.0776	50.3786	113.429	90.5455	95.0869	89.8627	89.3146	89.3143	39.4129
49.7003	78.9594	69.8268	73.1163	69.9637	70.3461	70.346	55.334	99.6881	82.7596	87.0387	83.2833	83.3571	83.3571	54.9014	112.093	97.8431	99.5198	96.916	96.5689	96.5688	51.5249	100.989	85.9369	89.7404	86.2087	86.1773	86.1773	53.5639	84.0733	71.5097	73.8128	71.534	71.9231	71.9231	38.5693	92.5957	83.1575	91.8941	84.5847	84.9759	84.9759	51.0503	109.275	87.7853	91.9103	87.2413	86.8073	86.807	39.9384
50.3542	73.1109	68.0192	70.1717	67.9329	68.3369	68.3369	56.0621	94.6145	80.2246	83.4206	80.6268	80.8416	80.8416	55.6238	101.963	94.0856	95.4909	93.3904	93.1533	93.1533	52.2028	95.1585	82.7722	85.7138	83.057	83.141	83.141	54.2687	80.9327	69.3443	70.5091	69.2039	69.6576	69.6576	39.0768	94.9515	81.2886	88.9857	82.4679	82.8692	82.8692	51.722	104.101	85.0191	88.6825	84.6161	84.2973	84.2971	40.4639
51.0082	68.285	66.2268	67.2406	65.9313	66.3523	66.3523	56.7901	93.9004	77.7188	79.8185	78.0059	78.3567	78.3567	56.3462	97.6404	90.3444	91.4622	89.886	89.7595	89.7595	52.8808	90.4607	79.6491	81.7061	79.9466	80.1422	80.1422	54.9734	75.9482	67.2059	67.2397	66.9143	67.4272	67.4272	39.5843	97.0819	79.4215	86.0159	80.3566	80.762	80.762	52.3937	97.5158	82.2544	85.4163	81.9938	81.7907	81.7905	40.9894
51.6622	67.6212	64.4508	64.3314	63.9607	64.3944	64.3944	57.5182	91.1792	75.2445	76.2434	75.4241	75.9054	75.9054	57.0686	92.8235	86.6305	87.4478	86.4116	86.3956	86.3956	53.5587	87.6384	76.5729	77.7319	76.8835	77.1863	77.1863	55.6782	71.7476	65.0961	64.0137	64.6673	65.234	65.234	40.0918	98.1258	77.5583	82.9973	78.2547	78.6585	78.6586	53.0654	96.7607	79.4984	82.1245	79.3808	79.2929	79.2927	41.5149
52.3161	68.0086	62.6925	61.4521	62.0229	62.4649	62.4649	58.2463	83.2356	72.8039	72.7059	72.8845	73.4905	73.4905	57.791	90.5335	82.954	83.461	82.9754	83.0689	83.0689	54.2367	87.2276	73.5481	73.8047	73.8728	74.2779	74.2779	56.383	67.1127	63.0164	60.8396	62.4648	63.0799	63.0799	40.5993	95.1709	75.7007	79.9421	76.1661	76.5627	76.5627	53.7372	96.0451	76.758	78.8197	76.7832	76.8091	76.809	42.0404
52.9701	65.7349	60.9531	58.6101	60.1193	60.5654	60.5654	58.9744	77.193	70.399	69.216	70.39	71.1143	71.1143	58.5134	92.2321	79.3245	79.5144	79.5849	79.7863	79.7862	54.9146	86.3188	70.5789	69.9375	70.9194	71.4213	71.4213	57.0878	63.1405	60.9682	57.7253	60.3085	60.9664	60.9665	41.1068	89.3106	73.8504	76.8624	74.0943	74.4781	74.4781	54.4089	90.5239	74.039	75.5137	74.2065	74.3443	74.3442	42.5659
53.624	65.2009	59.2336	55.8122	58.2513	58.6974	58.6974	59.7024	72.471	68.0316	65.7827	67.9428	68.7788	68.7788	59.2358	86.4017	75.7505	75.6198	76.2472	76.5538	76.5538	55.5926	78.6039	67.6687	66.142	68.0274	68.6202	68.6202	57.7926	59.9848	58.9529	54.678	58.1995	58.8951	58.8951	41.6142	85.1078	72.0092	73.7698	72.0425	72.4081	72.4081	55.0806	82.0689	71.3473	72.2182	71.6558	71.9028	71.9028	43.0914
54.278	65.0113	57.5352	53.0651	56.4199	56.8622	56.8623	60.4305	70.7038	65.7034	62.4145	65.545	66.4861	66.4861	59.9582	78.4366	72.2401	71.788	72.9684	73.3773	73.3773	56.2706	75.4777	64.8209	62.4288	65.2002	65.8779	65.878	58.4974	53.6892	56.9715	51.7042	56.1391	56.867	56.8671	42.1217	85.4584	70.1786	70.6756	70.0133	70.3557	70.3557	55.7523	76.1995	68.688	68.9441	69.1357	69.4888	69.4888	43.6169
54.9319	62.4977	55.8587	50.3744	54.6261	55.0609	55.061	61.1586	64.3054	63.416	59.1192	63.1986	64.2377	64.2378	60.6805	71.5993	68.8002	68.0293	69.7544	70.2618	70.2618	56.9485	69.2663	62.0381	58.8076	62.441	63.1974	63.1975	59.2022	51.0175	55.0252	48.8096	54.128	54.8833	54.8834	42.6292	87.4961	68.3601	67.5907	68.0094	68.3237	68.3237	56.424	73.3476	66.0657	65.7017	66.6506	67.106	67.106	44.1424
55.5859	60.6503	54.2053	47.7455	52.8705	53.2944	53.2945	61.8867	59.8826	61.1707	55.9037	60.905	62.0351	62.0352	61.4029	67.889	65.4375	64.3528	66.6101	67.2117	67.2118	57.6265	65.6621	59.3227	55.2869	59.7523	60.5811	60.5811	59.907	51.2358	53.115	45.9993	52.1671	52.9447	52.9448	43.1367	85.5471	66.5554	64.5254	66.0332	66.3149	66.3149	57.0957	69.8268	63.4846	62.5009	64.2043	64.7577	64.7578	44.6679
56.2398	51.7516	52.5757	45.1832	51.1539	51.5637	51.5638	62.6148	56.5946	58.9687	52.7741	58.6654	59.8795	59.8795	62.1253	67.2083	62.1574	60.7668	63.5399	64.2312	64.2312	58.3044	59.1123	56.6767	51.8743	57.1363	58.0308	58.0309	60.6118	50.0525	51.2417	43.2776	50.2567	51.052	51.052	43.6442	79.6273	64.7657	61.4895	64.0866	64.3314	64.3314	57.7674	68.415	60.9486	59.3506	61.8002	62.4472	62.4473	45.1934
56.8938	47.2817	50.9707	42.6918	49.4767	49.8692	49.8694	63.3428	53.2036	56.8112	49.736	56.4808	57.7718	57.7718	62.8477	62.7056	58.9649	57.2786	60.5477	61.3237	61.3237	58.9824	50.7823	54.1017	48.5761	54.5947	55.5485	55.5486	61.3165	47.4954	49.4062	40.6483	48.3972	49.2055	49.2056	44.1517	76.5192	62.9926	58.4922	62.1714	62.3755	62.3755	58.4392	62.9017	58.4611	56.2592	59.4415	60.1771	60.1772	45.7189
57.5477	46.4286	49.3911	40.2747	47.8392	48.2118	48.2119	64.0709	48.9782	54.6992	46.7939	54.3521	55.7129	55.713	63.5701	56.2397	55.8642	53.8946	57.6368	58.4921	58.4921	59.6604	47.3443	51.599	45.3977	52.1288	53.1354	53.1354	62.0213	40.7108	47.6092	38.1143	46.5887	47.4058	47.4058	44.6592	70.4942	61.2372	55.542	60.2893	60.4491	60.449	59.1109	55.1881	56.0249	53.2343	57.1308	57.9499	57.9501	46.2444
58.2017	45.976	47.8376	37.9352	46.2417	46.5916	46.5918	64.799	46.45	52.6335	43.9518	52.2797	53.7035	53.7035	64.2925	50.9026	52.8589	50.6205	54.81	55.739	55.739	60.3383	42.5655	49.1697	42.3435	49.7394	50.7924	50.7925	62.7261	36.1372	45.8513	35.678	44.8312	45.6529	45.653	45.1667	63.7544	59.5009	52.6467	58.4416	58.5537	58.5537	59.7826	55.002	53.6428	50.2827	54.8706	55.7677	55.7679	46.7699
58.8556	40.1481	46.3109	35.6759	44.6842	45.0092	45.0094	65.5271	41.0798	50.6148	41.2128	50.2641	51.7439	51.7439	65.0149	47.0724	49.9517	47.4607	52.0695	53.0663	53.0663	61.0163	38.7719	46.8145	39.4166	47.4272	48.5204	48.5205	63.4309	28.9346	44.133	33.341	43.1245	43.947	43.9471	45.6742	58.2701	57.7847	49.8135	56.6295	56.691	56.6909	60.4543	52.2369	51.3169	47.4106	52.6629	53.6325	53.6328	47.2954
59.5096	30.2427	44.8115	33.4988	43.1667	43.4648	43.465	66.2552	35.4307	48.6439	38.5796	48.3053	49.8346	49.8346	65.7373	41.5317	47.145	44.4191	49.417	50.4757	50.4758	61.6942	31.0012	44.534	36.6196	45.1924	46.3196	46.3197	64.1357	26.679	42.4548	31.1046	41.4685	42.288	42.2881	46.1817	53.0365	56.0899	47.0489	54.854	54.8622	54.8622	61.126	47.6747	49.0492	44.6233	50.5093	51.5459	51.5462	47.8209
60.1635	25.909	43.34	31.4055	41.6892	41.9583	41.9585	66.9832	28.3298	46.7211	36.0538	46.4035	47.9756	47.9757	66.4596	35.7322	44.4403	41.4985	46.8538	47.9685	47.9685	62.3722	25.8902	42.3283	33.9538	43.0349	44.1903	44.1904	64.8405	22.4695	40.817	28.9691	39.8627	40.6759	40.676	46.6891	47.8853	54.4174	44.3587	53.1158	53.0686	53.0686	61.7977	37.2127	46.8412	41.9255	48.4113	49.5092	49.5095	48.3464
60.8175	23.2866	41.8967	29.397	40.2515	40.49	40.4902	67.7113	23.0521	44.8469	33.6367	44.5584	46.1671	46.1672	67.182	30.3188	41.8388	38.7011	44.3807	45.5454	45.5454	63.0502	23.5308	40.1975	31.4198	40.9544	42.1324	42.1325	65.5453	22.2514	39.22	26.9348	38.3066	39.1104	39.1105	47.1966	40.5461	52.7684	41.7479	51.4157	51.3111	51.3111	62.4694	29.6333	44.6943	39.3209	46.3701	47.5235	47.5238	48.8719
61.4714	22.1821	40.4822	27.4741	38.8532	39.0597	39.06	68.4394	20.9287	43.0217	31.3289	42.7697	44.409	44.4091	67.9044	23.9502	39.3411	36.028	41.9983	43.2068	43.2069	63.7281	19.7325	38.1415	29.0174	38.9505	40.1455	40.1456	66.2501	22.152	37.6639	25.0011	36.7997	37.5911	37.5912	47.7041	31.2916	51.1436	39.2208	49.7541	49.5905	49.5905	63.1412	25.3101	42.6094	36.8128	44.3865	45.5897	45.5901	49.3974
62.1254	19.0824	39.0968	25.6369	37.4942	37.6674	37.6676	69.1675	15.8971	41.2455	29.1303	41.0371	42.7011	42.7011	68.6268	17.3602	36.9472	33.48	39.7064	40.953	40.953	64.4061	15.9405	36.1598	26.7458	37.0222	38.2292	38.2293	66.9548	19.1502	36.1488	23.167	35.3413	36.1176	36.1177	48.2116	23.7243	49.5439	36.7811	48.1315	47.9076	47.9075	63.8129	18.3604	40.5874	34.4035	42.4612	43.7086	43.709	49.923
62.7793	14.3192	37.7408	23.8852	36.1739	36.3128	36.3131	69.8955	12.8965	39.5185	27.0405	39.3599	41.0431	41.0432	69.3492	14.1309	34.6567	31.0569	37.505	38.7836	38.7837	65.084	13.243	34.2519	24.6033	35.1687	36.3827	36.3828	67.6596	15.5458	34.6748	21.4313	33.9306	34.6895	34.6896	48.7191	18.1186	47.9702	34.4317	46.548	46.2628	46.2628	64.4846	15.013	38.6288	32.095	40.5945	41.8806	41.881	50.4485
63.4333	11.214	36.4144	22.2185	34.892	34.9957	34.996	70.6236	10.0822	37.8407	25.0584	37.7376	39.4346	39.4347	70.0716	10.2788	32.469	28.7579	35.3932	36.6984	36.6984	65.762	10.2163	32.4171	22.5877	33.3888	34.6053	34.6054	68.3644	10.8957	33.2419	19.7921	32.567	33.3062	33.3063	49.2266	15.5575	46.4231	32.1751	45.0038	44.6567	44.6566	65.1563	13.2397	36.7338	29.8882	38.7866	40.1061	40.1065	50.974
64.0872	8.74679	35.1178	20.6358	33.6479	33.7158	33.7161	71.3517	8.57517	36.212	23.1825	36.1694	37.8752	37.8752	70.794	7.54788	30.3828	26.5818	33.3704	34.6964	34.6965	66.4399	8.75856	30.6546	20.6962	31.6812	32.8959	32.896	69.0692	8.71311	31.8499	18.2475	31.2496	31.9671	31.9672	49.7341	10.7216	44.9034	30.0129	43.4989	43.0895	43.0894	65.828	9.63037	34.9026	27.7839	37.0375	38.385	38.3855	51.4995
64.7412	6.15682	33.8513	19.136	32.4412	32.4727	32.473	72.0798	4.52669	34.6322	21.4109	34.6545	36.3642	36.3643	71.5164	4.07395	28.3966	24.5266	31.4352	32.7769	32.7769	67.1179	5.83088	28.9633	18.9257	30.0445	31.2534	31.2535	69.774	6.03723	30.4988	16.795	29.9774	30.6716	30.6717	50.2416	6.75408	43.4117	27.9462	42.0333	41.5614	41.5613	66.4997	5.6718	33.1351	25.7819	35.3471	36.7176	36.718	52.025
[truncated: 13 more columns]

## Sheet: WAT-176
spike_1							spike_2							spike_3							spike_4							spike_5							spike_6							spike_7							spike_8
Z-axis_1	Thickness-profile_1	skewed gaussian_1	gaussian_1	lognorm_1	gamma_1	chi2_1	Z-axis_2	Thickness-profile_2	skewed gaussian_2	gaussian_2	lognorm_2	gamma_2	chi2_2	Z-axis_3	Thickness-profile_3	skewed gaussian_3	gaussian_3	lognorm_3	gamma_3	chi2_3	Z-axis_4	Thickness-profile_4	skewed gaussian_4	gaussian_4	lognorm_4	gamma_4	chi2_4	Z-axis_5	Thickness-profile_5	skewed gaussian_5	gaussian_5	lognorm_5	gamma_5	chi2_5	Z-axis_6	Thickness-profile_6	skewed gaussian_6	gaussian_6	lognorm_6	gamma_6	chi2_6	Z-axis_7	Thickness-profile_7	skewed gaussian_7	gaussian_7	lognorm_7	gamma_7	chi2_7	Z-axis_8
0	4.60097	12.3653	32.3006	8.45848	0.797436	0.797779	0	5.98926	17.4597	17.1125	17.105	16.8252	16.8146	0	4.89392	21.8537	24.2837	19.1528	18.1025	18.1021	0	6.63304	38.0765	40.2527	34.8721	33.4651	33.4655	0	7.81357	37.3829	37.4057	36.0013	35.2259	35.2305	0	3.28061	25.8379	28.7391	22.8498	21.3753	21.3753	0	4.57544	13.2686	23.3884	10.9017	6.72458	6.72404	0
0.546005	5.46912	14.4227	34.3069	10.7303	2.55624	2.55673	0.483345	7.14021	18.7805	18.437	18.4295	18.1519	18.1413	0.449417	6.96042	23.8211	26.2545	21.1365	20.0909	20.0905	0.48391	14.6252	40.6046	42.7206	37.5177	36.1659	36.1662	0.468781	9.41982	39.6939	39.7158	38.3619	37.6154	37.6198	0.437408	7.88256	27.8705	30.7309	24.9553	23.5167	23.5167	0.415611	5.27654	14.9809	25.1635	12.691	8.45582	8.45526	0.437675
1.09201	6.48747	16.7234	36.3912	13.3402	5.1828	5.18336	0.96669	8.58359	20.1743	19.8359	19.8285	19.5544	19.5439	0.898842	9.11342	25.9154	28.3396	23.2635	22.2297	22.2293	0.967827	19.2705	43.2374	45.283	40.2841	38.9953	38.9956	0.937561	9.8832	42.0945	42.1155	40.8185	40.1045	40.1087	0.874817	11.6151	30.0105	32.8153	27.1859	25.7933	25.7933	0.831215	6.18383	16.853	27.0316	14.6701	10.4426	10.4421	0.875351
1.63802	7.18196	19.278	38.5527	16.2874	8.553	8.55358	1.45004	10.1948	21.6424	21.3108	21.3035	21.0341	21.0238	1.34826	12.017	28.1391	30.5411	25.537	24.5224	24.522	1.45174	23.6924	45.9738	47.9388	43.1696	41.9512	41.9515	1.40633	11.3746	44.5838	44.6038	43.37	42.6922	42.6962	1.31223	15.7114	32.2584	34.9924	29.542	28.2052	28.2052	1.24683	6.97845	18.8912	28.9938	16.8437	12.6902	12.6896	1.31303
2.18403	8.14792	22.0942	40.7902	19.5638	12.5488	12.5494	1.93338	12.1729	23.1862	22.8629	22.8559	22.5926	22.5825	1.79768	14.6311	30.4948	32.8606	27.9596	26.9716	26.9712	1.93565	27.8776	48.8123	50.6868	46.1721	45.0311	45.0314	1.87511	13.4473	47.1608	47.1797	46.0151	45.377	45.3806	1.74963	19.5351	34.6144	37.2623	32.0234	30.7519	30.7519	1.66243	8.87941	21.1002	31.0505	19.2145	15.1997	15.1991	1.7507
2.73003	9.32118	25.177	43.1023	23.1551	17.0611	17.0616	2.41673	14.3681	24.8067	24.4935	24.4867	24.2309	24.221	2.24711	17.1247	32.984	35.2994	30.5331	29.5792	29.5788	2.41956	31.9131	51.7508	53.525	49.2884	48.2314	48.2316	2.34389	21.0011	49.8237	49.8413	48.7518	48.1568	48.1601	2.18704	23.0469	37.078	39.6244	34.629	33.4319	33.4318	2.07803	10.2012	23.4841	33.202	21.7836	17.9688	17.9683	2.18838
3.27605	11.5879	28.5274	45.4872	27.0415	21.9897	21.9901	2.90006	16.5898	26.5048	26.2032	26.1966	25.9497	25.9402	2.69653	19.0461	35.6077	37.8582	33.2585	32.346	32.3456	2.90348	38.9646	54.7867	56.4512	52.5152	51.548	51.5482	2.81268	28.0072	52.5704	52.5868	51.5777	51.0289	51.0318	2.62445	26.0164	39.6483	42.0779	37.357	36.2428	36.2428	2.49364	12.8462	26.0453	35.4481	24.5499	20.9917	20.9912	2.62605
3.82205	13.5461	32.1428	47.9426	31.1976	27.2436	27.2439	3.38341	18.3584	28.2809	27.9927	27.9864	27.7498	27.7406	3.14595	21.6045	38.3665	40.5372	36.1358	35.2719	35.2716	3.38739	44.5031	57.9169	59.4628	55.8479	54.9756	54.9758	3.28146	34.2711	55.3985	55.4135	54.4901	53.9902	53.9928	3.06186	30.3586	42.3237	44.6213	40.2048	39.1815	39.1814	2.90925	16.0957	28.7848	37.7879	27.5098	24.2587	24.2582	3.06373
4.36806	18.2594	36.0161	50.4657	35.5945	32.7409	32.7412	3.86675	20.7994	30.1354	29.8621	29.8562	29.6312	29.6224	3.59537	27.467	41.2599	43.3359	39.1641	38.3558	38.3555	3.87131	50.3695	61.1377	62.5565	59.2815	58.5088	58.5089	3.75024	40.1719	58.305	58.3186	57.4854	57.0371	57.0393	3.49927	36.6163	45.1018	47.2528	43.169	42.2435	42.2435	3.32486	18.9269	31.7021	40.2202	30.6583	27.7575	27.7571	3.5014
4.91407	26.0675	40.136	53.0537	40.1999	38.408	38.4082	4.3501	24.1318	32.0682	31.8113	31.8058	31.5937	31.5855	4.04479	31.2189	44.2868	46.2534	42.3416	41.5954	41.5951	4.35522	60.8809	64.4446	65.7285	62.8102	62.1406	62.1408	4.21902	51.6309	61.2866	61.2985	60.5598	60.1653	60.1671	3.93668	41.7709	47.98	49.9702	46.2453	45.424	45.4239	3.74046	22.0829	34.7948	42.7432	33.9876	31.4726	31.4723	3.93908
5.46008	34.5684	44.4865	55.7029	44.9789	44.1792	44.1793	4.83344	27.6308	34.0787	33.8399	33.8348	33.637	33.6292	4.49421	33.9981	47.4452	49.2878	45.6653	44.9871	44.9869	4.83913	72.9304	67.8328	68.9748	66.4277	65.864	65.8641	4.6878	63.9553	64.3392	64.3496	63.7088	63.3701	63.3715	4.37408	46.7472	50.9545	52.7706	49.4286	48.7166	48.7166	4.15607	25.785	38.0588	45.3546	37.4884	35.3861	35.3858	4.37675
6.00608	45.675	49.0472	58.4095	49.8955	49.9961	49.9962	5.31679	30.8002	36.1663	35.9469	35.9422	35.76	35.7528	4.94363	44.445	50.7324	52.4368	49.1312	48.5266	48.5263	5.32304	80.7524	71.2969	72.2906	70.1265	69.6707	69.6708	5.15657	73.635	67.4585	67.4672	66.9276	66.6462	66.6471	4.81149	50.9092	54.0212	55.6507	52.713	52.1145	52.1145	4.57168	28.4068	41.4881	48.0517	41.1492	39.4778	39.4776	4.81443
6.55209	60.3033	53.7935	61.1692	54.9126	55.8074	55.8074	5.80013	32.8995	38.3298	38.1312	38.127	37.9615	37.9549	5.39306	54.723	54.1445	55.6972	52.7342	52.2078	52.2076	5.80695	87.4559	74.8306	75.6707	73.899	73.5521	73.5522	5.62535	80.8896	70.6398	70.6468	70.2106	69.9877	69.9882	5.2489	56.5253	57.1752	58.6067	56.0917	55.6098	55.6097	4.98728	37.0443	45.0744	50.8308	44.9566	43.7258	43.7257	5.25211
7.0981	72.9189	58.6966	63.9772	59.9935	61.5676	61.5675	6.28348	35.4793	40.5676	40.391	40.3873	40.2396	40.2336	5.84248	62.808	57.6769	59.0651	56.4678	56.0237	56.0235	6.29087	93.2673	78.4276	79.1096	77.7367	77.4988	77.4989	6.09413	91.0705	73.8777	73.883	73.5519	73.3883	73.3883	5.68631	63.5978	60.4109	61.634	59.5571	59.1937	59.1936	5.40289	44.5769	48.8081	53.688	48.8957	48.1068	48.1067	5.68977
7.6441	83.0833	63.7243	66.8284	65.1017	67.2374	67.2373	6.76682	38.6706	42.8778	42.7243	42.7211	42.5922	42.5869	6.2919	71.0582	61.3239	62.536	60.3249	59.9662	59.9661	6.77478	99.6962	82.0804	82.601	81.6305	81.5007	81.5007	6.56291	101.945	77.1664	77.17	76.945	76.841	76.8406	6.12372	69.8031	63.722	64.728	63.1009	62.8567	62.8566	5.8185	51.4978	52.6769	56.6186	52.9498	52.596	52.5959	6.12745
8.19012	90.3357	68.8414	69.7174	70.2023	72.7827	72.7826	7.25016	44.5744	45.2578	45.1284	45.1258	45.0166	45.0121	6.74132	77.0714	65.079	66.1043	64.2968	64.0258	64.0258	7.2587	102.515	85.7815	86.1383	85.5707	85.5472	85.5472	7.03169	106.106	80.4998	80.5016	80.383	80.3384	80.3376	6.56113	74.7621	67.1014	67.8829	66.714	66.5885	66.5884	6.23411	59.2266	56.6672	59.6174	57.1012	57.1683	57.1684	6.56512
8.73612	98.6625	74.01	72.638	75.2616	78.1742	78.174	7.73351	50.2003	47.705	47.6005	47.5985	47.5097	47.5059	7.19074	83.2499	68.9345	69.7638	68.3738	68.1921	68.192	7.74261	103.038	89.5225	89.7144	89.5471	89.6272	89.6272	7.50047	107.355	83.8711	83.8712	83.8584	83.8728	83.8716	6.99854	79.206	70.5417	71.093	70.3866	70.3781	70.3781	6.64971	68.3858	60.7631	62.6784	61.3307	61.798	61.7981	7.0028
9.28213	103.391	79.191	75.584	80.2482	83.3869	83.3867	8.21685	55.0359	50.2159	50.1371	50.1356	50.0679	50.0649	7.64016	90.5608	72.882	73.5074	72.5453	72.4532	72.4532	8.22652	104.678	93.2947	93.3218	93.5491	93.7293	93.7292	7.96925	108.222	87.2733	87.2717	87.3634	87.4357	87.4341	7.43594	83.0868	74.0345	74.3517	74.1082	74.2139	74.2139	7.06532	75.9167	64.9475	65.7953	65.6186	66.4591	66.4593	7.44048
9.82814	103.022	84.3443	78.5489	85.1328	88.4001	88.3999	8.7002	58.3221	52.7869	52.7341	52.7333	52.6872	52.685	8.08958	94.0967	76.9119	77.3274	76.7996	76.7965	76.7966	8.71043	105.136	97.0888	96.9524	97.5655	97.8412	97.8411	8.43803	112.439	90.6989	90.6955	90.8898	91.0185	91.0164	7.87335	86.594	77.5709	77.6519	77.8678	78.0837	78.0837	7.48093	82.1774	69.2014	68.961	69.9443	71.1263	71.1266	7.87815
10.3741	102.366	89.4294	81.5255	89.8886	93.1965	93.1963	9.18354	61.0616	55.4138	55.3873	55.3871	55.3629	55.3615	8.53901	92.9985	81.0139	81.215	81.1239	81.2083	81.2084	9.19435	107.985	100.895	100.598	101.585	101.951	101.951	8.90681	116.609	94.1398	94.1348	94.4287	94.6119	94.6095	8.31076	89.075	81.1416	80.9862	81.6538	81.9748	81.9748	7.89653	87.7581	73.5046	72.1679	74.2866	75.7742	75.7745	8.31583
10.9202	106.771	94.4069	84.5065	94.4914	97.7622	97.7619	9.66689	64.6151	58.0918	58.0918	58.0922	58.09	58.0894	8.98843	90.0694	85.1765	85.1608	85.5045	85.674	85.6741	9.67826	112.524	104.704	104.25	105.595	106.046	106.046	9.37559	117.582	97.588	97.5814	97.9713	98.2067	98.2039	8.74817	95.4815	84.7364	84.3466	85.4542	85.8741	85.8741	8.31214	92.0317	77.8358	75.4078	78.6243	80.3785	80.3788	8.7535
11.4662	108.902	99.2391	87.4843	98.9196	102.086	102.086	10.1502	69.0812	60.8158	60.8421	60.8431	60.863	60.8633	9.43785	87.6587	89.3877	89.1546	89.9269	90.1781	90.1782	10.1622	118.968	108.505	107.898	109.585	110.113	110.113	9.84437	118.978	101.035	101.027	101.508	101.793	101.79	9.18558	98.996	88.3449	87.7247	89.2565	89.7683	89.7683	8.72775	97.6369	82.1726	78.672	82.936	84.9155	84.9158	9.19118
12.0122	108.453	103.89	90.4511	103.154	106.16	106.16	10.6336	72.9412	63.5803	63.6327	63.6343	63.676	63.6771	9.88727	89.216	93.6343	93.1856	94.376	94.7044	94.7046	10.6461	122.241	112.287	111.535	113.542	114.14	114.14	10.3131	122.899	104.471	104.462	105.03	105.361	105.357	9.62299	102.51	91.9562	91.1116	93.048	93.6437	93.6437	9.14335	102.565	86.4923	81.9513	87.2008	89.3627	89.3631	9.62885
12.5582	112.453	108.328	93.3987	107.18	109.978	109.978	11.1169	75.5459	66.3793	66.4572	66.4593	66.5225	66.5244	10.3367	95.8854	97.9028	97.2422	98.8358	99.2363	99.2365	11.13	121.597	116.039	115.149	117.453	118.113	118.113	10.7819	128.638	107.888	107.877	108.526	108.899	108.896	10.0604	107.622	95.5589	94.498	96.8156	97.4866	97.4866	9.55896	104.226	90.7716	85.2361	91.3979	93.6992	93.6996	10.0665
13.1042	117.899	112.522	96.3188	110.982	113.537	113.536	11.6003	77.1999	69.2063	69.3089	69.3116	69.3958	69.3984	10.7861	98.3036	102.179	101.312	103.29	103.756	103.757	11.6139	123.818	119.75	118.731	121.307	122.021	122.021	11.2507	134.192	111.277	111.264	111.987	112.399	112.395	10.4978	109.12	99.1415	97.8745	100.546	101.283	101.283	9.97456	106.031	94.9871	88.5162	95.5072	97.9048	97.9053	10.5042
13.6502	118.813	116.449	99.2031	114.55	116.833	116.833	12.0836	78.967	72.0545	72.1808	72.1841	72.2884	72.2918	11.2355	104.619	106.447	105.382	107.721	108.247	108.248	12.0978	132.65	123.41	122.272	125.09	125.849	125.849	11.7195	136.352	114.626	114.613	115.402	115.849	115.845	10.9352	111.735	102.692	101.231	104.227	105.02	105.02	10.3902	109.501	99.1157	91.7812	99.5095	101.962	101.962	10.9419
14.1962	116.315	120.087	102.043	117.875	119.868	119.868	12.5669	81.0116	74.9166	75.0655	75.0693	75.1928	75.197	11.685	113.552	110.692	109.44	112.113	112.691	112.691	12.5817	139.6	127.006	125.759	128.791	129.587	129.586	12.1883	136.321	117.928	117.913	118.762	119.239	119.234	11.3726	115.071	106.198	104.558	107.844	108.682	108.682	10.8058	116.981	103.135	95.0203	103.386	105.852	105.853	11.3796
14.7422	115.201	123.42	104.829	120.951	122.642	122.642	13.0503	85.0318	77.7851	77.9551	77.9595	78.1011	78.1059	12.1344	120.75	114.899	113.471	116.447	117.07	117.07	13.0657	144.369	130.527	129.184	132.398	133.22	133.22	12.657	132.921	121.171	121.156	122.056	122.558	122.553	11.81	121.69	109.648	107.844	111.385	112.258	112.258	11.2214	122.748	107.022	98.2225	107.12	109.562	109.563	11.8172
15.2882	115.461	126.436	107.554	123.774	125.158	125.158	13.5336	87.8165	80.6519	80.8415	80.8463	81.0048	81.0103	12.5838	127.432	119.05	117.461	120.706	121.365	121.365	13.5496	144.496	133.962	132.536	135.898	136.738	136.738	13.1258	129.124	124.347	124.331	125.273	125.795	125.79	12.2474	126.888	113.03	111.079	114.836	115.734	115.734	11.637	123.51	110.758	101.376	110.696	113.078	113.079	12.2549
15.8342	114.993	129.129	110.209	126.341	127.42	127.42	14.017	89.8571	83.5089	83.7163	83.7215	83.8954	83.9015	13.0332	136.759	123.129	121.396	124.873	125.56	125.56	14.0335	142.484	137.3	135.805	139.28	140.129	140.128	13.5946	128.037	127.445	127.428	128.403	128.941	128.936	12.6848	126.788	116.331	114.253	118.185	119.097	119.097	12.0526	122.389	114.321	104.471	114.097	116.388	116.388	12.6926
16.3802	111.567	131.494	112.784	128.652	129.433	129.432	14.5003	88.7436	86.3476	86.5709	86.5764	86.764	86.7706	13.4826	138.655	127.121	125.261	128.931	129.636	129.636	14.5174	144.022	140.53	138.979	142.533	143.381	143.381	14.0634	126.856	130.455	130.438	131.437	131.984	131.979	13.1222	125.495	119.539	117.354	121.421	122.335	122.335	12.4682	120.846	117.694	107.494	117.312	119.481	119.481	13.1302
16.9262	115.84	133.535	115.271	130.707	131.201	131.201	14.9837	93.5153	89.1591	89.3962	89.4021	89.6017	89.6088	13.9321	142.807	131.008	129.041	132.861	133.576	133.577	15.0013	142.131	143.641	142.049	145.646	146.485	146.485	14.5322	134.337	133.368	133.35	134.364	134.916	134.911	13.5597	128.637	122.642	120.373	124.53	125.437	125.437	12.8838	119.731	120.861	110.435	120.328	122.35	122.35	13.5679
17.4723	119.937	135.255	117.663	132.511	132.731	132.731	15.467	98.0012	91.9347	92.1832	92.1894	92.3991	92.4066	14.3815	144.662	134.775	132.721	136.649	137.365	137.365	15.4852	146.358	146.622	145.005	148.61	149.43	149.43	15.0009	137.619	136.173	136.156	137.175	137.725	137.721	13.9971	127.578	125.629	123.298	127.502	128.391	128.391	13.2994	121.818	123.807	113.282	123.134	124.987	124.988	14.0056
18.0183	123.446	136.662	119.95	134.065	134.03	134.03	15.9504	101.196	94.6651	94.9228	94.9291	95.147	95.1549	14.8309	147.453	138.404	136.287	140.277	140.986	140.986	15.9691	151.133	149.463	147.836	151.413	152.207	152.207	15.4697	136.541	138.863	138.845	139.86	140.404	140.399	14.4345	125.367	128.488	126.119	130.326	131.187	131.187	13.715	122.064	126.519	116.023	125.722	127.388	127.388	14.4433
18.5643	126.465	137.769	122.125	135.377	135.105	135.105	16.4337	103.691	97.3413	97.6056	97.6121	97.8361	97.8441	15.2803	149.966	141.882	139.723	143.731	144.423	144.423	16.453	153.217	152.155	150.534	154.048	154.807	154.807	15.9385	140.862	141.426	141.409	142.409	142.942	142.938	14.8719	125.332	131.209	128.826	132.992	133.816	133.816	14.1306	123.815	128.987	118.648	128.084	129.548	129.548	14.881
19.1103	130.572	138.588	124.181	136.451	135.965	135.965	16.917	107.993	99.9539	100.222	100.229	100.457	100.465	15.7298	147.919	145.192	143.016	146.996	147.663	147.664	16.937	149.358	154.689	153.089	156.505	157.223	157.223	16.4073	136.539	143.856	143.839	144.815	145.332	145.327	15.3093	128.403	133.782	131.408	135.49	136.27	136.27	14.5462	122.749	131.202	121.146	130.214	131.466	131.466	15.3186
19.6563	133.419	139.135	126.109	137.294	136.616	136.616	17.4004	110.805	102.494	102.764	102.77	103	103.008	16.1792	153.18	148.319	146.15	150.058	150.693	150.694	17.4209	152.754	157.055	155.492	158.778	159.447	159.447	16.8761	135.572	146.142	146.126	147.069	147.564	147.56	15.7467	133.84	136.196	133.857	137.813	138.539	138.539	14.9618	124.109	133.157	123.506	132.109	133.14	133.14	15.7563
20.2023	135.364	139.426	127.903	137.915	137.068	137.068	17.8837	116.874	104.952	105.221	105.227	105.456	105.465	16.6286	156.251	151.251	149.113	152.904	153.5	153.501	17.9048	158.218	159.245	157.735	160.859	161.473	161.473	17.3448	134.731	148.278	148.262	149.164	149.633	149.629	16.1841	134.341	138.443	136.162	139.951	140.617	140.617	15.3775	126.626	134.849	125.719	133.764	134.571	134.572	16.194
20.7483	131.099	139.479	129.557	138.321	137.328	137.328	18.3671	117.579	107.319	107.584	107.591	107.817	107.825	17.078	154.493	153.974	151.891	155.523	156.074	156.074	18.3887	163.65	161.253	159.809	162.741	163.295	163.295	17.8136	137.258	150.255	150.24	151.091	151.53	151.526	16.6215	136.762	140.513	138.314	141.899	142.499	142.499	15.7931	127.458	136.276	127.775	135.178	135.761	135.761	16.6317
21.2943	131.85	139.312	131.063	138.521	137.407	137.407	18.8504	118.794	109.587	109.845	109.852	110.073	110.081	17.5274	149.349	156.477	154.472	157.905	158.403	158.404	18.8726	160.748	163.07	161.707	164.421	164.909	164.909	18.2824	137.624	152.066	152.052	152.845	153.249	153.246	17.0589	141.317	142.4	140.306	143.651	144.178	144.178	16.2087	129.334	137.437	129.664	136.352	136.713	136.713	17.0693
21.8403	133.545	138.943	132.418	138.525	137.311	137.311	19.3338	118.957	111.746	111.995	112.002	112.215	112.223	17.9769	159.13	158.748	156.844	160.039	160.481	160.481	19.3565	160.038	164.691	163.423	165.892	166.311	166.311	18.7512	137.824	153.706	153.693	154.42	154.785	154.782	17.4963	144.336	144.097	142.13	145.2	145.651	145.651	16.6243	130.782	138.334	131.379	137.286	137.429	137.429	17.507
22.3863	135.962	138.389	133.615	138.341	137.05	137.05	19.8171	116.819	113.788	114.026	114.032	114.236	114.244	18.4263	162.174	160.777	158.997	161.919	162.299	162.3	19.8404	156.996	166.112	164.949	167.151	167.498	167.498	19.22	137.998	155.166	155.155	155.809	156.133	156.13	17.9337	145.171	145.597	143.777	146.543	146.914	146.914	17.0399	129.57	138.971	132.912	137.983	137.916	137.916	17.9447
22.9323	134.463	137.668	134.651	137.979	136.632	136.632	20.3005	116.171	115.705	115.93	115.935	116.128	116.135	18.8757	165.401	162.556	160.92	163.537	163.853	163.853	20.3244	163.625	167.326	166.281	168.196	168.468	168.468	19.6887	143.49	156.444	156.433	157.009	157.288	157.286	18.3711	149.326	146.895	145.242	147.677	147.966	147.966	17.4555	131.569	139.352	134.257	138.446	138.178	138.178	18.3824
23.4783	130.843	136.797	135.52	137.45	136.067	136.067	20.7838	114.646	117.49	117.698	117.703	117.883	117.889	19.3251	168.02	164.078	162.604	164.888	165.136	165.137	20.8083	166.416	168.33	167.414	169.024	169.22	169.22	20.1575	144.121	157.532	157.523	158.015	158.247	158.245	18.8086	147.556	147.988	146.519	148.6	148.804	148.804	17.8711	130.013	139.485	135.406	138.679	138.223	138.223	18.82
24.0243	130.837	135.789	136.221	136.762	135.362	135.362	21.2671	115.185	119.134	119.325	119.33	119.494	119.5	19.7745	167.889	165.335	164.041	165.968	166.147	166.147	21.2922	160.965	169.121	168.343	169.635	169.753	169.753	20.6263	143.684	158.429	158.421	158.824	159.007	159.005	19.246	149.629	148.871	147.602	149.309	149.429	149.429	18.2867	127.91	139.378	136.355	138.689	138.056	138.056	19.2577
24.5704	132.544	134.661	136.75	135.926	134.526	134.526	21.7505	118.696	120.633	120.803	120.807	120.954	120.96	20.224	167.306	166.324	165.224	166.775	166.884	166.884	21.7761	162.106	169.698	169.065	170.027	170.068	170.068	21.0951	151.262	159.129	159.123	159.434	159.566	159.565	19.6834	145.97	149.543	148.486	149.805	149.84	149.84	18.7023	126.57	139.04	137.1	138.482	137.687	137.687	19.6954
25.1164	135.244	133.426	137.105	134.951	133.567	133.567	22.2338	120.163	121.978	122.127	122.131	122.259	122.264	20.6734	166.547	167.041	166.149	167.307	167.346	167.346	22.26	164.42	170.058	169.576	170.202	170.166	170.166	21.5639	155.267	159.631	159.627	159.842	159.922	159.922	20.1208	144.942	150.002	149.169	150.087	150.039	150.039	19.1179	124.554	138.48	137.637	138.064	137.123	137.122	20.133
25.6624	134.626	132.095	137.285	133.846	132.493	132.493	22.7172	118.918	123.165	123.291	123.294	123.402	123.406	21.1228	164.606	167.484	166.81	167.565	167.534	167.534	22.7439	163.789	170.202	169.876	170.161	170.05	170.05	22.0326	155.838	159.933	159.93	160.048	160.076	160.076	20.5582	144.485	150.247	149.648	150.159	150.029	150.029	19.5335	125.046	137.711	137.964	137.443	136.372	136.372	20.5707
26.2084	134.116	130.68	137.289	132.621	131.312	131.312	23.2005	117.861	124.188	124.29	124.292	124.379	124.383	21.5722	161.254	167.653	167.204	167.55	167.45	167.45	23.2278	163.524	170.13	169.964	169.906	169.721	169.721	22.5014	163.164	160.033	160.032	160.052	160.028	160.028	20.9956	143.408	150.279	149.919	150.021	149.812	149.812	19.9491	126.754	136.742	138.078	136.629	135.444	135.443	21.0084
26.7544	132.272	129.19	137.117	131.286	130.031	130.032	23.6839	119.692	125.043	125.119	125.121	125.187	125.189	22.0217	151.412	167.547	167.329	167.264	167.099	167.099	23.7117	165.733	169.842	169.837	169.439	169.185	169.185	22.9702	162.526	159.931	159.932	159.854	159.777	159.778	21.433	135.748	150.099	149.984	149.676	149.392	149.392	20.3647	128.039	135.588	137.981	135.629	134.347	134.347	21.4461
27.3004	130.822	127.634	136.77	129.849	128.659	128.659	24.1672	118.915	125.727	125.777	125.778	125.821	125.822	22.4711	152.65	167.169	167.185	166.713	166.484	166.484	24.1957	168.455	169.341	169.498	168.766	168.444	168.444	23.439	154.917	159.628	159.631	159.456	159.328	159.329	21.8704	134.265	149.711	149.84	149.129	148.774	148.774	20.7803	126.664	134.259	137.671	134.454	133.092	133.092	21.8838
27.8464	132.428	126.021	136.25	128.318	127.202	127.202	24.6505	115.941	126.236	126.259	126.259	126.279	126.28	22.9205	156.55	166.523	166.773	165.901	165.613	165.612	24.6796	169.18	168.631	168.948	167.889	167.504	167.504	23.9078	150.634	159.125	159.129	158.858	158.681	158.682	22.3078	135.023	149.115	149.488	148.385	147.964	147.964	21.196	123.384	132.769	137.151	133.112	131.688	131.688	22.3214
28.3924	134.357	124.358	135.557	126.702	125.667	125.667	25.1339	113.551	126.567	126.564	126.563	126.559	126.56	23.3699	155.378	165.613	166.094	164.834	164.491	164.491	25.1635	165.942	167.713	168.188	166.815	166.371	166.371	24.3765	154.314	158.423	158.429	158.066	157.84	157.842	22.7452	135.983	148.318	148.931	147.448	146.966	146.966	21.6116	120.529	131.129	136.423	131.615	130.145	130.145	22.7591
28.9384	130.642	122.649	134.695	125.009	124.06	124.06	25.6172	114.437	126.72	126.69	126.689	126.662	126.661	23.8193	156.918	164.445	165.151	163.521	163.127	163.127	25.6474	163.01	166.594	167.221	165.549	165.051	165.051	24.8453	156.629	157.526	157.533	157.081	156.81	156.812	23.1826	137.932	147.323	148.171	146.324	145.787	145.787	22.0272	118.015	129.353	135.49	129.971	128.472	128.471	23.1968
29.4844	127.095	120.902	133.668	123.247	122.389	122.389	26.1006	116.944	126.694	126.637	126.635	126.585	126.583	24.2688	154.003	163.026	163.95	161.969	161.53	161.53	26.1313	159.634	165.277	166.052	164.097	163.55	163.55	25.3141	153.8	156.436	156.445	155.907	155.594	155.596	23.62	140.733	146.137	147.209	145.021	144.435	144.435	22.4428	119.447	127.453	134.356	128.193	126.678	126.678	23.6345
30.0304	126.424	119.121	132.478	121.423	120.659	120.66	26.5839	113.173	126.487	126.405	126.403	126.33	126.327	24.7182	153.258	161.365	162.496	160.188	159.71	159.709	26.6152	151.174	163.769	164.684	162.466	161.876	161.877	25.7829	156.742	155.158	155.169	154.551	154.197	154.2	24.0575	141.31	144.764	146.052	143.545	142.917	142.917	22.8584	119.695	125.44	133.027	126.288	124.775	124.774	24.0721
30.5764	117.62	117.311	131.131	119.545	118.877	118.877	27.0673	108.648	126.103	125.995	125.993	125.897	125.894	25.1676	151.451	159.47	160.795	158.189	157.677	157.676	27.0991	148.072	162.076	163.122	160.663	160.037	160.037	26.2517	154.409	153.697	153.708	153.017	152.627	152.63	24.4949	136.801	143.214	144.702	141.904	141.24	141.24	23.274	119.434	123.326	131.509	124.269	122.77	122.77	24.5098
31.1224	111.353	115.474	129.631	117.619	117.048	117.048	27.5506	108.582	125.54	125.409	125.406	125.29	125.286	25.617	145.424	157.352	158.856	155.983	155.442	155.442	27.5831	150.244	160.205	161.372	158.697	158.039	158.039	26.7204	152.099	152.057	152.07	151.311	150.888	150.892	24.9323	134.656	141.492	143.166	140.107	139.414	139.414	23.6896	123.927	121.122	129.808	122.145	120.674	120.673	24.9475
31.6684	108.584	113.615	127.984	115.651	115.177	115.178	28.034	106.145	124.803	124.65	124.646	124.51	124.505	26.0664	144.698	155.023	156.688	153.58	153.018	153.018	28.067	146.355	158.164	159.441	156.575	155.893	155.893	27.1892	145.436	150.246	150.259	149.441	148.989	148.993	25.3697	129.047	139.607	141.45	138.161	137.446	137.446	24.1052	128.81	118.84	127.932	119.926	118.495	118.494	25.3851
32.2145	107.217	111.736	126.196	113.647	113.271	113.271	28.5173	104.244	123.894	123.72	123.715	123.56	123.555	26.5159	138.046	152.493	154.301	150.994	150.416	150.416	28.5509	145.249	155.96	157.336	154.306	153.605	153.605	27.658	140.389	148.268	148.283	147.412	146.936	146.94	25.8071	131.946	137.568	139.561	136.075	135.346	135.346	24.5208	131.277	116.488	125.89	117.623	116.242	116.242	25.8228
32.7605	104.244	109.841	124.274	111.615	111.332	111.333	29.0006	104.264	122.816	122.623	122.618	122.446	122.44	26.9653	131.76	149.775	151.706	148.237	147.65	147.65	29.0348	145.58	153.603	155.063	151.898	151.186	151.186	28.1268	136.121	146.133	146.149	145.233	144.737	144.741	26.2445	134.106	135.383	137.507	133.859	133.122	133.122	24.9364	122.593	114.078	123.689	115.244	113.924	113.924	26.2605
33.3065	104.608	107.932	122.225	109.557	109.368	109.368	29.484	107.845	121.574	121.364	121.359	121.172	121.165	27.4147	132.338	146.882	148.915	145.322	144.732	144.732	29.5187	138.59	151.1	152.632	149.362	148.644	148.644	28.5956	133.038	143.847	143.863	142.912	142.399	142.404	26.6819	129.946	133.063	135.295	131.522	130.784	130.784	25.352	117.996	111.617	121.34	112.8	111.55	111.55	26.6982
33.8525	102.475	106.012	120.055	107.481	107.381	107.381	29.9673	111.26	120.173	119.948	119.943	119.742	119.735	27.8641	127.862	143.829	145.94	142.263	141.676	141.676	30.0026	135.946	148.462	150.05	146.705	145.988	145.988	29.0643	131.596	141.418	141.435	140.456	139.933	139.938	27.1193	130.795	130.616	132.934	129.073	128.341	128.341	25.7676	117.253	109.115	118.853	110.299	109.127	109.127	27.1358
34.3985	103.689	104.082	117.773	105.391	105.376	105.376	30.4507	109.781	118.618	118.382	118.376	118.164	118.156	28.3136	124.854	140.628	142.794	139.072	138.495	138.495	30.4865	134.834	145.697	147.327	143.938	143.228	143.228	29.5331	134.729	138.855	138.872	137.875	137.346	137.351	27.5567	129.765	128.052	130.433	126.522	125.802	125.802	26.1832	115.029	106.579	116.238	107.751	106.664	106.664	27.5735
34.9445	103.349	102.145	115.386	103.29	103.357	103.357	30.934	105.609	116.917	116.67	116.664	116.443	116.435	28.763	125.951	137.293	139.491	135.765	135.202	135.202	30.9704	138.757	142.815	144.471	141.07	140.373	140.373	30.0019	135.882	136.166	136.184	135.178	134.648	134.652	27.9941	128.028	125.382	127.801	123.878	123.177	123.177	26.5988	112.809	104.018	113.505	105.164	104.167	104.167	28.0112
35.4905	100.749	100.202	112.903	101.185	101.328	101.328	31.4174	107.145	115.075	114.821	114.815	114.587	114.579	29.2124	126.148	133.84	136.046	132.353	131.811	131.81	31.4544	140.075	139.826	141.494	138.11	137.432	137.432	30.4707	132.186	133.362	133.379	132.374	131.846	131.851	28.4315	120.442	122.615	125.049	121.151	120.474	120.474	27.0144	110.026	101.438	110.667	102.545	101.644	101.644	28.4489
36.0365	101.496	98.2562	110.332	99.0771	99.2928	99.2929	31.9007	108.567	113.1	112.841	112.835	112.602	112.594	29.6618	130.386	130.283	132.472	128.852	128.334	128.334	31.9383	143.637	136.741	138.404	135.069	134.415	134.415	30.9394	129.54	130.45	130.468	129.472	128.952	128.957	28.8689	120.953	119.762	122.187	118.35	117.704	117.704	27.4301	108.38	98.8453	107.733	99.904	99.102	99.1018	28.8866
36.5825	100.516	96.3086	107.681	96.9716	97.2542	97.2543	32.384	114.824	111	110.739	110.733	110.498	110.489	30.1112	130.668	126.635	128.784	125.274	124.786	124.786	32.4222	143.748	133.569	135.212	131.955	131.33	131.33	31.4082	127.01	127.442	127.459	126.481	125.974	125.979	29.3064	122.254	116.833	119.225	115.486	114.875	114.875	27.8457	106.383	96.2465	104.716	97.2468	96.547	96.5467	29.3242
37.1285	99.9551	94.361	104.959	94.8716	95.2155	95.2156	32.8674	118.11	108.783	108.522	108.516	108.281	108.273	30.5607	131.753	122.912	124.998	121.632	121.179	121.178	32.9061	144.143	130.32	131.927	128.777	128.187	128.187	31.877	124.478	124.346	124.363	123.412	122.922	122.926	29.7438	120.669	113.839	116.173	112.567	111.995	111.995	28.2613	100.464	93.6468	101.627	94.5809	93.985	93.9848	29.7619
37.6745	101.084	92.4152	102.175	92.78	93.1797	93.1798	33.3507	120.579	106.457	106.2	106.193	105.961	105.953	31.0101	132.23	119.127	121.128	117.941	117.525	117.524	33.39	138.86	127.005	128.561	125.546	124.995	124.995	32.3458	123.896	121.173	121.189	120.273	119.804	119.808	30.1812	118.836	110.788	113.043	109.602	109.074	109.074	28.6769	97.9022	91.0515	98.4772	91.9128	91.4222	91.4219	30.1996
38.2205	103.136	90.4727	99.3378	90.6999	91.1496	91.1497	33.8341	124.134	104.031	103.78	103.774	103.546	103.538	31.4595	133.381	115.293	117.189	114.211	113.836	113.836	33.8739	135.075	123.633	125.124	122.27	121.762	121.762	32.8146	121.891	117.931	117.947	117.075	116.631	116.635	30.6186	118.193	107.691	109.844	106.6	106.121	106.121	29.0925	96.1295	88.4653	95.2785	89.2488	88.8636	88.8634	30.6373
38.7666	104.463	88.5349	96.4554	88.6338	89.1278	89.1278	34.3174	124.578	101.515	101.272	101.266	101.045	101.037	31.9089	129.823	111.425	113.195	110.456	110.125	110.125	34.3578	129.509	120.214	121.626	118.959	118.497	118.498	33.2833	121.98	114.632	114.647	113.826	113.411	113.415	31.056	114.99	104.558	106.588	103.57	103.142	103.142	29.5081	96.6446	85.8926	92.042	86.5947	86.3145	86.3143	31.0749
39.3126	101.275	86.6035	93.5368	86.5843	87.1165	87.1166	34.8008	122.937	98.9169	98.685	98.6793	98.4677	98.4601	32.3583	128.749	107.536	109.162	106.687	106.402	106.402	34.8418	125.32	116.758	118.077	115.62	115.209	115.209	33.7521	122.157	111.285	111.299	110.537	110.154	110.158	31.4934	111.85	101.397	103.285	100.521	100.147	100.147	29.9237	99.2842	83.3374	88.7787	83.9559	83.7796	83.7794	31.5126
39.8586	100.679	84.6798	90.5903	84.5534	85.1182	85.1182	35.2841	117.37	96.2468	96.0281	96.0227	95.8225	95.8153	32.8078	120.119	103.637	105.103	102.916	102.679	102.679	35.3257	122.95	113.274	114.488	112.262	111.904	111.904	34.2209	120.996	107.9	107.912	107.216	106.869	106.872	31.9308	101.842	98.219	99.946	97.4595	97.1426	97.1426	30.3393	98.3773	80.8033	85.4993	81.3374	81.2631	81.263	31.9503
40.4046	99.7826	82.7652	87.6242	82.5433	83.1347	83.1348	35.7675	108.399	93.5141	93.3106	93.3057	93.1189	93.1121	33.2572	116.695	99.7411	101.032	99.1521	98.9654	98.9652	35.8096	122.392	109.771	110.869	108.894	108.592	108.592	34.6897	116.91	104.485	104.497	103.872	103.563	103.567	32.3682	96.0527	95.0312	96.5806	94.3943	94.1361	94.1361	30.7549	96.7771	78.2937	82.2146	78.7437	78.7693	78.7692	32.3879
40.9506	97.8404	80.8611	84.6468	80.5558	81.1681	81.1682	36.2508	108.247	90.728	90.5419	90.5374	90.366	90.3597	33.7066	115.555	95.8596	96.9628	95.407	95.2711	95.2709	36.2935	120.492	106.259	107.23	105.523	105.279	105.279	35.1585	114.596	101.052	101.062	100.514	100.247	100.25	32.8056	94.4119	91.8425	93.1992	91.3325	91.1345	91.1345	31.1705	93.7986	75.8117	78.9345	76.1792	76.3018	76.3017	32.8256
41.4966	93.8828	78.9687	81.6657	78.5924	79.2201	79.2201	36.7341	104.422	87.8981	87.7311	87.7272	87.5728	87.5672	34.156	113.469	92.0032	92.9077	91.6899	91.6053	91.6052	36.7774	115.696	102.746	103.58	102.157	101.972	101.972	35.6272	111.316	97.6081	97.6167	97.1513	96.927	96.9297	33.243	95.1181	88.6609	89.8115	88.2812	88.1443	88.1443	31.5861	89.8555	73.3601	75.6687	73.6478	73.8641	73.8641	33.2633
42.0426	90.5482	77.0894	78.6888	76.6548	77.2923	77.2923	37.2175	97.2172	85.0336	84.8875	84.8841	84.7484	84.7434	34.6055	110.613	88.182	88.8788	88.0095	87.9765	87.9764	37.2613	108.951	99.2396	99.9283	98.8028	98.6779	98.6779	36.096	108.521	94.163	94.1701	93.7912	93.6121	93.6145	33.6804	94.5803	85.4941	86.4269	85.247	85.1718	85.1719	32.0017	84.6077	70.9414	72.4265	71.1529	71.4593	71.4593	33.701
42.5886	90.9407	75.2243	75.7232	74.7441	75.3862	75.3862	37.7008	95.2154	82.1436	82.0199	82.0171	81.9015	81.8972	35.0549	106.372	84.4056	84.888	84.3745	84.3927	84.3927	37.7452	103.836	95.7486	96.2849	95.4672	95.4036	95.4036	36.5648	107.747	90.7251	90.7306	90.4417	90.3095	90.3116	34.1178	92.5994	82.3491	83.0546	82.2361	82.2229	82.2229	32.4173	80.4618	68.5581	69.2167	68.6977	69.0902	69.0902	34.1386
43.1346	88.4377	73.3744	72.7761	72.8616	73.5031	73.5031	38.1842	93.9928	79.2373	79.1372	79.1351	79.0409	79.0373	35.5043	102.916	80.6828	80.9459	80.7923	80.8612	80.8611	38.2291	102.865	92.2801	92.6578	92.1566	92.1548	92.1548	37.0336	109.468	87.3027	87.3066	87.1106	87.0265	87.0282	34.5553	92.5588	79.2328	79.7033	79.2545	79.3029	79.3029	32.8329	78.3295	66.2121	66.0474	66.2851	66.7594	66.7594	34.5763
43.6806	85.1548	71.5411	69.8541	71.0083	71.6442	71.6442	38.6675	90.5498	76.3233	76.2479	76.2465	76.1746	76.1719	35.9537	97.3063	77.0217	77.0627	77.2701	77.3887	77.3886	38.7131	100.318	88.8413	89.0557	88.8773	88.9372	88.9372	37.5024	106.849	83.9037	83.9058	83.805	83.7698	83.7712	34.9927	92.3324	76.1515	76.3811	76.3076	76.417	76.417	33.2486	74.8827	63.9054	62.9262	63.9174	64.4691	64.4692	35.014
44.2266	81.8863	69.7253	66.9636	69.1851	69.8107	69.8106	39.1509	85.4412	73.4102	73.3602	73.3595	73.311	73.309	36.4031	92.3935	73.4295	73.2477	73.8143	73.9811	73.9812	39.197	96.4714	85.4388	85.4861	85.6347	85.756	85.756	37.9711	103.658	80.5355	80.5359	80.5318	80.546	80.547	35.4301	87.33	73.111	73.096	73.4004	73.5698	73.5698	33.6642	71.5462	61.6396	59.8605	61.5971	62.2215	62.2215	35.4517
44.7726	78.757	67.928	64.1105	67.3927	68.0034	68.0034	39.6342	83.2481	70.5059	70.4822	70.4821	70.4576	70.4564	36.8526	89.479	69.9131	69.5096	70.4306	70.6442	70.6442	39.6809	92.9333	82.0789	81.9567	82.4342	82.6163	82.6162	38.4399	98.2593	77.2052	77.2039	77.2972	77.3611	77.3617	35.8675	85.6701	70.1169	69.8551	70.5376	70.7656	70.7657	34.0798	68.1658	59.4164	56.8565	59.3259	60.0182	60.0182	35.8894
45.3186	75.5625	66.1502	61.3003	65.6317	66.2234	66.2234	40.1176	82.7186	67.6185	67.6213	67.6219	67.6218	67.6216	37.302	83.1502	66.4783	65.8561	67.1243	67.3827	67.3828	40.1648	91.1686	78.7674	78.4744	79.2806	79.5224	79.5223	38.9087	94.1852	73.9195	73.9164	74.1072	74.2206	74.2209	36.3049	82.8856	67.174	66.6655	67.7234	68.0085	68.0085	34.4954	65.1764	57.2371	53.9203	57.1056	57.8608	57.8609	36.327
45.8647	72.7855	64.3929	58.5383	63.9028	64.4714	64.4713	40.6009	77.1513	64.7554	64.7848	64.7862	64.8109	64.8115	37.7514	75.1438	63.1305	62.2943	63.8998	64.201	64.2011	40.6487	88.0261	75.5097	75.0459	76.1785	76.4787	76.4786	39.3775	87.295	70.6845	70.6797	70.9675	71.13	71.1299	36.7423	79.1418	64.2868	63.5332	64.9617	65.302	65.302	34.911	61.1807	55.1028	51.057	54.9374	55.7506	55.7507	36.7647
46.4107	70.9226	62.6567	55.829	62.2064	62.748	62.7479	41.0842	69.5279	61.9235	61.9796	61.9817	62.0312	62.0327	38.2008	65.4884	59.8742	58.8304	60.7612	61.1028	61.1029	41.1326	82.3685	72.3107	71.6771	73.1319	73.4888	73.4887	39.8463	78.0721	67.506	67.4995	67.8832	68.0939	68.0935	37.1797	74.8323	61.4594	60.4642	62.256	62.6493	62.6493	35.3266	55.025	53.0146	48.2715	52.8226	53.6888	53.6889	37.2024
46.9567	69.3422	60.9427	53.177	60.5427	61.0539	61.0538	41.5676	63.2383	59.1296	59.2121	59.215	59.2891	59.2915	38.6502	58.0792	56.7133	55.4696	57.7117	58.0912	58.0913	41.6165	78.4849	69.1748	68.3737	70.1445	70.5563	70.5562	40.315	72.5736	64.3894	64.3811	64.8589	65.1169	65.1162	37.6171	71.1893	58.6955	57.4637	59.6094	60.0532	60.0532	35.7422	50.1482	50.9735	45.5678	50.7619	51.6762	51.6763	37.6401
47.5027	64.4127	59.2515	50.5861	58.9121	59.3895	59.3894	42.0509	57.1637	56.3796	56.4882	56.4917	56.5904	56.5936	39.0997	50.3858	53.6511	52.2168	54.7542	55.1689	55.1691	42.1005	77.0959	66.1061	65.1407	67.2196	67.6841	67.684	40.7838	63.7841	61.3393	61.3294	61.8989	62.2029	62.2018	38.0545	65.3408	55.9981	54.5364	57.0245	57.5163	57.5164	36.1578	46.468	48.9801	42.9493	48.7561	49.7136	49.7137	38.0777
48.0487	61.4666	57.5839	48.0598	57.3147	57.7552	57.7552	42.5343	51.1384	53.6795	53.8134	53.8176	53.9402	53.9443	39.5491	43.0228	50.6901	49.0756	51.8908	52.3381	52.3382	42.5844	72.6901	63.1083	61.9828	64.3602	64.8752	64.8751	41.2526	54.9217	58.3602	58.3486	59.007	59.3554	59.354	38.4919	57.7974	53.3702	51.6865	54.5037	55.0409	55.0409	36.5734	41.5883	47.0351	40.4191	46.8057	47.8015	47.8017	38.5154
48.5947	54.1733	55.9406	45.6012	55.7506	56.1516	56.1515	43.0176	46.2523	51.0343	51.1928	51.1977	51.3437	51.3486	39.9985	35.2239	47.8325	46.0491	49.1234	49.6003	49.6005	43.0683	65.7567	60.1844	58.904	61.5689	62.1319	62.1318	41.7214	49.0436	55.456	55.4428	56.1867	56.5778	56.576	38.9293	49.5125	50.8139	48.9175	52.049	52.6286	52.6287	36.989	36.2897	45.1389	37.9794	44.9109	45.9403	45.9405	38.9531
49.1407	49.0078	54.3221	43.213	54.2198	54.5787	54.5786	43.501	41.7927	48.4489	48.631	48.6366	48.8051	48.8108	40.4479	28.7668	45.0798	43.1398	46.4532	46.9569	46.9571	43.5522	58.6451	57.3372	55.9078	58.8479	59.4562	59.456	42.1902	43.0593	52.6299	52.6153	53.4408	53.8726	53.8705	39.3667	43.184	48.3314	46.2328	49.6621	50.2812	50.2812	37.4046	30.7445	43.2921	35.6322	43.0719	44.1302	44.1304	39.3907
49.6867	43.7686	52.729	40.8974	52.7224	53.0368	53.0366	43.9843	35.8388	45.9275	46.1321	46.1383	46.3285	46.3349	40.8974	22.4598	42.4328	40.3493	43.881	44.4086	44.4088	44.0361	50.7277	54.5691	52.9975	56.1992	56.85	56.8498	42.6589	35.0643	49.8851	49.869	50.772	51.2422	51.2399	39.8042	36.4312	45.9242	43.6348	47.3443	47.9999	47.9999	37.8202	25.3028	41.4948	33.3786	41.2886	42.3714	42.3716	39.8284
50.2327	38.3451	51.1619	38.6563	51.2581	51.526	51.5259	44.4677	29.4167	43.4739	43.6997	43.7065	43.9173	43.9245	41.3468	16.5214	39.8921	37.6786	41.4071	41.9557	41.9559	44.52	42.3789	51.882	50.1757	53.6242	54.3145	54.3144	43.1277	29.1166	47.2239	47.2065	48.1824	48.6888	48.6862	40.2416	30.8343	43.5935	41.1257	45.0967	45.7856	45.7856	38.2358	21.2146	39.7472	31.2195	39.5607	40.6637	40.6639	40.2661
50.7787	31.9645	49.6213	36.4912	49.827	50.0465	50.0464	44.951	24.674	41.0914	41.3371	41.3444	41.5747	41.5826	41.7962	13.8963	37.4575	35.128	39.0315	39.5981	39.5984	45.0039	33.8664	49.2775	47.4445	51.1242	51.8512	51.851	43.5965	24.0951	44.6484	44.6298	45.6737	46.2139	46.211	40.679	26.0053	41.3403	38.7072	42.9201	43.6391	43.6392	38.6514	18.021	38.0494	29.1551	37.888	39.007	39.0072	40.7038
51.3247	25.5022	48.1075	34.4032	48.4286	48.5983	48.5981	45.4343	20.346	38.7828	39.047	39.0548	39.3033	39.3119	42.2456	11.9032	35.1287	32.6974	36.7537	37.3356	37.3359	45.4878	29.0741	46.7568	44.8058	48.7002	49.4608	49.4606	44.0653	19.512	42.1603	42.1405	43.2473	43.8187	43.8156	41.1164	20.4771	39.165	36.3804	40.8149	41.5609	41.5609	39.067	14.6171	36.4013	27.1854	36.27	37.4009	37.4012	41.1414
51.8707	20.1968	46.621	32.3932	47.063	47.1813	47.1811	45.9177	16.5573	36.5505	36.8316	36.8399	37.1053	37.1144	42.695	9.5848	32.9047	30.386	34.5731	35.1674	35.1677	45.9718	22.6885	44.3207	42.2607	46.3529	47.144	47.1438	44.5341	16.044	39.7608	39.7399	40.9043	41.5043	41.5009	41.5538	16.6457	37.0681	34.146	38.7813	39.5512	39.5512	39.4827	11.3155	34.8028	25.3098	34.7061	35.8453	35.8455	41.5791
52.4167	15.6887	45.1621	30.4616	45.7296	45.7955	45.7953	46.401	12.3691	34.3964	34.6927	34.7015	34.9823	34.992	43.1445	8.0574	30.7844	28.1926	32.4885	33.0926	33.0928	46.4557	17.0399	41.9698	39.8102	44.0826	44.9011	44.9008	45.0028	12.7044	37.4506	37.4288	38.6454	39.2711	39.2676	41.9912	12.7444	35.0494	32.0045	36.8193	37.61	37.61	39.8983	8.37194	33.2537	23.5273	33.1956	34.3395	34.3397	42.0168
52.9628	10.3608	43.7311	28.6085	44.4283	44.4407	44.4406	46.8844	9.25117	32.3219	32.6319	32.6411	32.9359	32.9461	43.5939	6.27044	28.7661	26.1155	30.4986	31.1098	31.1101	46.9396	11.5678	39.7043	37.4547	41.8896	42.7323	42.732	45.4716	9.55103	35.2304	35.2078	36.4708	37.1196	37.1159	42.4286	9.67101	33.1087	29.9557	34.9287	35.7371	35.7371	40.3139	6.8002	31.7537	21.8368	31.7378	32.8829	32.8832	42.4545
53.5088	6.53793	42.3283	26.8336	43.1587	43.1169	43.1168	47.3677	6.08997	30.3281	30.6502	30.6597	30.9669	30.9776	44.0433	5.18472	26.8481	24.1524	28.6017	29.2175	29.2178	47.4235	7.90122	37.524	35.1944	39.7736	40.6375	40.6372	45.9404	6.20771	33.1001	33.0767	34.3806	35.0497	35.0458	42.866	5.88128	31.2455	27.9992	33.1091	33.9322	33.9322	40.7295	5.12784	30.3024	20.2366	30.3319	31.475	31.4753	42.8922
54.0548	3.698	40.9538	25.1367	41.9203	41.8239	41.8237	47.8511	3.9917	28.4157	28.748	28.7578	29.076	29.0871	44.4927	4.21359	25.0283	22.301	26.7961	27.4141	27.4144	47.9074	5.10802	35.4288	33.029	37.7344	38.6164	38.6162	46.4092	4.00708	31.0595	31.0354	32.3745	33.0611	33.0571	43.3034	4.06915	29.459	26.1342	31.3598	32.1946	32.1946	41.1451	4.14276	28.8993	18.7247	28.9768	30.115	30.1153	43.3298
[truncated: 6 more columns]

## Sheet: WAT-156
spike_1							spike_2							spike_3							spike_4							spike_5							spike_6							spike_7							spike_8
Z-axis_1	Thickness-profile_1	skewed gaussian_1	gaussian_1	lognorm_1	gamma_1	chi2_1	Z-axis_2	Thickness-profile_2	skewed gaussian_2	gaussian_2	lognorm_2	gamma_2	chi2_2	Z-axis_3	Thickness-profile_3	skewed gaussian_3	gaussian_3	lognorm_3	gamma_3	chi2_3	Z-axis_4	Thickness-profile_4	skewed gaussian_4	gaussian_4	lognorm_4	gamma_4	chi2_4	Z-axis_5	Thickness-profile_5	skewed gaussian_5	gaussian_5	lognorm_5	gamma_5	chi2_5	Z-axis_6	Thickness-profile_6	skewed gaussian_6	gaussian_6	lognorm_6	gamma_6	chi2_6	Z-axis_7	Thickness-profile_7	skewed gaussian_7	gaussian_7	lognorm_7	gamma_7	chi2_7	Z-axis_8
0	4.59554	6.28049	25.7362	4.55374	0.0726927	0.0725133	0	1.96968	0.000759517	9.32306	0	0	0	0	2.6519	0.62868	12.5306	0.00127648	0	0	0	2.46313	0.220475	16.9294	0	0	0	0	4.44591	10.1884	24.8064	8.80154	5.96538	5.96539	0	3.89966	1.3026e-09	28.3022	2.41529	0	0	0	3.02823	3.64317	20.6927	1.57178	0	0	0
0.820457	4.81351	7.74723	27.556	6.1931	0.769232	0.768711	0.897141	2.02929	0.00188863	10.0722	0	0	0	0.796242	2.81974	0.872065	13.5985	0.00994749	0	0	0.742897	2.90284	0.360831	18.0804	0	0	0	0.793282	5.91767	11.7481	26.3367	10.5806	7.87177	7.87178	0.986176	4.78116	8.3882e-08	29.7778	4.30115	0	0	0.842415	3.41896	4.53267	21.9957	2.447	0	0	0.830067
1.64091	6.02045	9.47138	29.4583	8.17995	2.27205	2.27129	1.79428	1.4311	0.00450482	10.8645	0	0	0	1.59248	3.04635	1.19471	14.7329	0.0449113	0	0	1.48579	3.45579	0.576532	19.2836	3.69434e-08	0	0	1.58656	7.79625	13.4762	27.9255	12.5624	10.0477	10.0477	1.97235	6.36471	3.6087e-06	31.2931	6.81474	0	0	1.68483	4.28678	5.59022	23.3516	3.60151	0.351944	0.351943	1.66013
2.46137	6.65633	11.477	31.4427	10.5287	4.55592	4.55503	2.69142	1.56015	0.0103088	11.7008	0	0	0	2.38873	2.62049	1.61662	15.9353	0.143333	0	0	2.22868	3.62216	0.899485	20.5392	0.00201456	0	0	2.37984	8.42758	15.3788	29.5721	14.7452	12.4791	12.4791	2.95852	7.47995	0.000103939	32.8466	9.91617	0	0	2.52724	4.71735	6.83493	24.7604	5.05912	1.56794	1.56794	2.4902
3.28183	6.82547	13.7858	33.5083	13.2445	7.5512	7.55026	3.58856	2.08081	0.022637	12.5817	0	0	0	3.18497	3.0217	2.16079	17.2071	0.360925	0	0	2.97158	3.06372	1.37056	21.8471	0.0567761	0	0	3.17312	8.05144	17.4603	31.2756	17.1243	15.148	15.148	3.9447	7.90476	0.00201006	34.4362	13.5314	0	0	3.36966	4.81075	8.2852	26.2214	6.83322	3.48398	3.48398	3.32027
4.10229	7.43174	16.4157	35.6537	16.323	11.171	11.1701	4.4857	2.35626	0.047709	13.5077	0	0	0	3.98121	3.71106	2.85311	18.5496	0.766403	0	0	3.71447	3.3229	2.03999	23.207	0.344919	0	0	3.9664	12.1466	19.7232	33.0346	19.6918	18.0334	18.0334	4.93087	9.69423	0.0262018	36.0599	17.5672	2.54836	2.54836	4.21207	5.0058	9.95799	27.7341	8.92672	5.96878	5.96878	4.15034
4.92274	9.71379	19.3802	37.8772	19.7513	15.3225	15.3216	5.38284	3.27413	0.0965289	14.4792	0	0	0	4.77745	3.66132	3.72188	19.9634	1.43267	0	0	4.45736	4.38051	2.96675	24.6183	1.10659	0	0	4.75967	17.4153	22.1678	34.8477	22.4371	21.1124	21.1124	5.91705	9.58733	0.231499	37.7153	21.9225	12.9765	12.9765	5.05449	6.99513	11.868	29.2975	11.3327	8.91342	8.91342	4.98041
5.7432	12.2402	22.6868	40.1763	23.5078	19.9129	19.9122	6.27998	3.2528	0.187545	15.4963	0	0	0	5.5737	3.23558	4.79722	21.4493	2.42762	0	0	5.20026	4.84152	4.2167	26.0802	2.52631	0	0	5.55296	21.245	24.7919	36.7131	25.3473	24.3603	24.3603	6.90322	8.05305	1.39742	39.3999	26.4972	21.6884	21.6884	5.89691	8.45457	14.0269	30.9106	14.0354	12.2246	12.2246	5.81047
6.56366	13.3758	26.3362	42.5484	27.5643	24.8528	24.8521	7.17712	3.07639	0.35001	16.5587	9.15147e-07	0	0	6.36994	3.52281	6.11007	23.0075	3.80665	0	0	5.94316	4.63224	5.85907	27.5918	4.68799	0	0	6.34624	24.1768	27.5907	38.6287	28.4072	27.7516	27.7516	7.88939	8.30648	5.83215	41.1109	31.1972	29.3692	29.3692	6.73932	8.84899	16.4425	32.5719	17.0118	15.8215	15.8215	6.64054
7.38411	13.2682	30.3215	44.9901	31.8864	30.0577	30.0572	8.07426	2.91635	0.627668	17.6664	0.0125504	0	0	7.16618	4.85717	7.69098	24.6377	5.60773	0	0	6.68605	4.96335	7.96134	29.1516	7.5829	0	0	7.13951	33.4668	30.5568	40.592	31.5996	31.2605	31.2605	8.87556	21.5869	17.1368	42.8453	35.938	36.2399	36.2399	7.58174	12.4968	19.118	34.2798	20.2329	19.6336	19.6336	7.47061
8.20457	23.0807	34.6278	47.4974	36.4352	35.4494	35.4491	8.9714	3.69045	1.082	18.8185	0.212031	0	0	7.96243	5.58133	9.56867	26.3395	7.84927	1.22942	1.22949	7.42894	5.63964	10.5829	30.7581	11.1368	0.838967	0	7.93279	44.2756	33.68	42.6002	34.9059	34.8612	34.8612	9.86174	33.3987	36.4582	44.5999	40.6459	42.4242	42.4242	8.42415	24.2014	22.0513	36.0324	23.6657	23.5993	23.5993	8.30068
9.02503	36.622	39.2313	50.0661	41.1684	40.9565	40.9563	9.86854	5.04679	1.79378	20.0145	0.955809	0	0	8.75867	6.29637	11.7683	28.1121	10.5302	4.27991	4.27999	8.17184	7.81627	13.7675	32.4094	15.2373	8.72299	5.13141	8.72607	49.4654	36.9473	44.6504	38.3064	38.5281	38.5281	10.8479	55.3931	58.6028	46.3712	45.2587	48.0058	48.0058	9.26657	33.3806	25.2347	37.8275	27.2741	27.6649	27.6649	9.13074
9.84549	48.2134	44.1001	52.6911	46.0415	46.5143	46.5142	10.7657	5.59593	2.86141	21.2531	2.50034	0	0	9.55491	7.93955	14.3099	29.9539	13.6318	8.31475	8.31482	8.91473	9.85706	17.536	34.1034	19.7561	16.2326	13.937	9.51935	52.1457	40.3433	46.739	41.7804	42.2365	42.2365	11.8341	77.9315	75.6142	48.1556	49.7251	53.0481	53.0481	10.109	38.3296	28.6542	39.6626	31.0206	31.7835	31.7835	9.96082
10.6659	60.0661	49.1944	55.3671	51.0094	52.0649	52.0649	11.6628	5.29133	4.39463	22.5329	4.90383	0	0	10.3512	8.50994	17.2061	31.8633	17.1203	12.974	12.9741	9.65763	13.2177	21.8803	35.8376	24.5641	23.2729	21.8362	10.3126	52.418	43.8498	48.8625	45.3069	45.9627	45.9627	12.8203	92.3563	84.3506	49.9493	54.0042	57.6017	57.6017	10.9514	43.0626	32.2898	41.5349	34.8675	35.9143	35.9143	10.7909
11.4864	73.1406	54.4668	58.0879	56.0269	57.5572	57.5573	12.56	6.8291	6.50265	23.8525	8.07821	0.922331	0	11.1474	8.31382	20.4611	33.838	20.9504	18.027	18.027	10.4005	26.7302	26.7583	37.6092	29.5402	29.8365	29.0132	11.1059	55.4334	47.4467	51.0168	48.8647	49.6839	49.6839	13.8064	99.2452	87.3098	51.7484	58.0647	61.7093	61.7093	11.7938	50.1043	36.1156	43.4416	38.7774	40.0219	40.0219	11.621
12.3069	83.2514	59.8641	60.8472	61.0499	62.9464	62.9465	13.4571	7.93834	9.27748	25.2097	11.8613	8.2282	3.52517	11.9436	14.7164	24.069	35.8753	25.0687	23.3086	23.3086	11.1434	36.3225	32.0935	39.4152	34.577	35.9334	35.5586	11.8992	57.2101	51.1116	53.1976	52.4326	53.3786	53.3786	14.7926	93.0129	87.9067	53.5486	61.8833	65.4073	65.4073	12.6362	52.8537	40.1001	45.3792	42.7146	44.0759	44.0759	12.451
13.1273	89.3817	65.3283	63.6378	66.0361	68.1934	68.1937	14.3542	8.57747	12.7743	26.6024	16.0691	14.7973	12.1091	12.7399	24.1693	28.0127	37.972	29.4165	28.695	28.6951	11.8863	41.8541	37.7768	41.2523	39.5827	41.5797	41.5342	12.6925	53.2351	54.8206	55.4004	55.99	57.0271	57.0271	15.7788	81.6453	87.8822	55.3456	65.4438	68.728	68.728	13.4786	50.1434	44.2069	47.3443	46.6451	48.0502	48.0502	13.2811
13.9478	89.5116	70.7985	66.4523	70.9458	73.2652	73.2655	15.2514	12.1809	16.9928	28.0281	20.5258	20.7696	19.2307	13.5361	30.3867	32.2638	40.1242	33.9331	34.0911	34.0911	12.6292	48.1614	43.6726	43.1168	44.4812	46.7937	46.9881	13.4857	54.1619	58.5488	57.6202	59.5169	60.6107	60.6107	16.765	67.517	87.7341	57.1351	68.7363	71.6999	71.6999	14.3211	47.3747	48.3955	49.333	50.5376	51.9224	51.9224	14.1112
14.7682	83.798	76.2126	69.2827	75.7421	78.1335	78.1339	16.1485	23.5774	21.8645	29.484	25.0783	26.2071	25.429	14.3324	38.6102	36.7824	42.3279	38.5578	39.4226	39.4226	13.3721	56.2321	49.6286	45.0049	49.2118	51.5951	51.9608	14.279	55.59	62.2702	59.852	62.994	64.1123	64.1123	17.7511	52.6306	87.5498	58.9124	71.7559	74.3489	74.3489	15.1635	43.056	52.6227	51.3413	54.3635	55.6738	55.6738	14.9412
15.5887	85.2566	81.5089	72.1207	80.3916	82.7752	82.7756	17.0457	29.4476	27.2496	30.9669	29.6014	31.1548	30.9012	15.1286	57.5005	41.518	44.5783	43.2321	44.6317	44.6317	14.115	63.2989	55.4861	46.9124	53.7273	56.0036	56.4872	15.0723	57.1305	65.9586	62.0903	66.4032	67.5167	67.5167	18.7373	53.91	87.3393	60.6729	74.5018	76.6984	76.6984	16.0059	50.0217	56.8435	53.3648	58.0969	59.2887	59.2887	15.7713
16.4091	86.9338	86.6285	74.9576	84.8643	87.1713	87.1718	17.9428	32.9075	32.9468	32.4734	33.9972	35.6501	35.761	15.9249	66.8672	46.4113	46.8702	47.9008	49.6731	49.6731	14.8579	65.5248	61.0933	48.8349	57.9927	60.0391	60.5986	15.8656	61.3471	69.5881	64.3295	69.7275	70.8099	70.8099	19.7235	59.5374	87.1036	62.4119	76.977	78.7698	78.7698	16.8483	53.7528	61.0125	55.3992	61.7152	62.7543	62.7543	16.6014
17.2296	81.6155	91.5167	77.7842	89.1339	91.307	91.3075	18.8399	36.5718	38.7143	33.9999	38.1927	39.7256	40.087	16.7211	66.1852	51.3956	49.1979	52.5134	54.5121	54.5121	15.6008	66.2866	66.3157	50.7677	61.9835	63.7206	64.3232	16.6589	70.2347	73.133	66.5639	72.9512	73.9794	73.9794	20.7096	74.6507	86.843	64.1244	79.1867	80.5827	80.5827	17.6907	52.2509	65.0854	57.4395	65.1986	66.0603	66.0603	17.4314
18.0501	86.3292	96.1244	80.5911	93.1779	95.171	95.1714	19.7371	49.2678	44.2996	35.5424	42.1364	43.4108	43.9386	17.5173	61.3708	56.3999	51.5553	57.0244	59.1222	59.1222	16.3437	70.0564	71.0454	52.7059	65.6836	67.0669	67.6868	17.4521	77.8287	76.5691	68.7873	76.0601	77.0146	77.0146	21.6958	83.4614	86.5576	65.8058	81.1388	82.1554	82.1554	18.5331	55.9526	69.02	59.4809	68.5304	69.1984	69.1984	18.2615
18.8705	91.7787	100.41	83.3687	96.9774	98.7552	98.7556	20.6342	55.2274	49.4715	37.0966	45.7941	46.7325	47.3639	18.3136	62.7863	61.3511	53.9357	61.3942	63.4837	63.4837	17.0866	77.1751	75.2076	54.6443	69.0845	70.0962	70.7131	18.2454	86.054	79.8734	70.9936	79.0411	79.9061	79.9061	22.682	86.4935	86.2476	67.4511	82.8424	83.5046	83.5046	19.3756	66.7905	72.7777	61.5182	71.6966	72.1624	72.1624	19.0916
19.691	97.4882	104.338	86.1072	100.517	102.055	102.055	21.5314	54.8901	54.0475	38.6581	49.1456	49.7155	50.4031	19.1098	67.7245	66.1776	56.332	65.5883	67.5828	67.5827	17.8295	82.6091	78.7619	56.5778	72.1834	72.826	73.4242	19.0387	88.9209	83.0249	73.1766	81.883	82.6457	82.6457	23.6682	86.9641	85.9134	69.0554	84.308	84.6461	84.6461	20.218	75.4779	76.3241	63.5461	74.6861	74.9479	74.9479	19.9216
20.5114	102.8	107.884	88.7965	103.786	105.067	105.067	22.4285	54.6083	57.9113	40.2223	52.1819	52.3828	53.0908	19.9061	65.7911	70.8113	58.737	69.5784	71.4101	71.41	18.5724	85.889	81.7016	58.5007	74.9819	75.273	75.8406	19.832	89.5432	86.0047	75.3297	84.5757	85.2271	85.2271	24.6543	83.54	85.5553	70.614	85.547	85.5943	85.5943	21.0604	81.2776	79.6303	65.5591	77.49	77.5521	77.5521	20.7517
21.3319	108.972	111.031	91.4266	106.774	107.791	107.791	23.3256	57.5514	61.0184	41.7842	54.9022	54.7559	55.4572	20.7023	66.0525	75.1909	61.1426	73.3413	74.9603	74.9603	19.3153	81.7933	84.0489	60.4075	77.4859	77.4533	77.9814	20.6253	93.6897	88.7964	77.4465	87.1109	87.6448	87.6448	25.6405	81.9064	85.1735	72.1221	86.5711	86.3627	86.3627	21.9028	86.6535	82.6731	67.5518	80.1021	79.9735	79.9735	21.5818
22.1523	113.88	113.769	93.9873	109.477	110.229	110.23	24.2228	64.3477	63.389	43.3388	57.312	56.8547	57.5291	21.4985	74.0986	79.2638	63.5408	76.8587	78.2314	78.2314	20.0581	74.3952	85.8487	62.2924	79.7037	79.3825	79.8646	21.4185	94.5232	91.386	79.5205	89.4813	89.8948	89.8948	26.6267	74.9325	84.7684	73.575	87.3927	86.9642	86.9642	22.7452	90.4046	85.4353	69.5185	82.518	82.2116	82.2116	22.4118
22.9728	115.576	116.098	96.4687	111.892	112.386	112.386	25.1199	67.7682	65.0929	44.8808	59.4212	58.698	59.3308	22.2948	85.6691	82.9877	65.9233	80.1174	81.224	81.224	20.801	76.1701	87.1612	64.1495	81.6459	81.0752	81.5068	22.2118	93.5953	93.7627	81.5451	91.6815	91.974	91.974	27.6129	65.7863	84.3404	74.968	88.024	87.4104	87.4104	23.5876	95.3858	87.906	71.4534	84.7354	84.2674	84.2674	23.2419
23.7933	115.366	118.024	98.8607	114.018	114.265	114.265	26.0171	66.1483	66.2304	46.4048	61.243	60.3032	60.8839	23.091	95.3852	86.3314	68.2811	83.108	83.9409	83.9409	21.5439	80.3923	88.0543	65.9731	83.3244	82.5456	82.9239	23.0051	94.5252	95.9181	83.5138	93.7071	93.8807	93.8807	28.599	76.9649	83.8897	76.2967	88.4771	87.7124	87.7124	24.43	99.2066	90.0803	73.3508	86.7536	86.1424	86.1424	24.072
24.6137	111.657	119.561	101.154	115.858	115.873	115.873	26.9142	62.5363	66.9127	47.9054	62.7928	61.6869	62.2084	23.8873	89.8983	89.2753	70.6056	85.8254	86.3867	86.3867	22.2868	79.0435	88.5975	67.7571	84.7524	83.8071	84.1306	23.7984	94.9492	97.8466	85.4201	95.5551	95.6139	95.6139	29.5852	85.7622	83.4169	77.5568	88.7643	87.8807	87.8807	25.2725	103.192	91.9587	75.2049	88.5736	87.8392	87.8393	24.902
25.4342	117.642	120.725	103.338	117.415	117.217	117.218	27.8113	63.3469	67.2471	49.3771	64.0871	62.8645	63.3222	24.6835	89.5278	91.8114	72.8878	88.2676	88.5676	88.5676	23.0297	71.6184	88.8569	69.4955	85.9438	84.8724	85.1409	24.5917	98.3795	99.5457	87.2576	97.2237	97.1737	97.1737	30.5714	88.683	82.9222	78.7442	88.8972	87.9249	87.9249	26.1149	97.7756	93.5471	77.01	90.1975	89.361	89.361	25.7321
26.2546	123.432	121.539	105.404	118.696	118.307	118.307	28.7085	70.4753	67.3269	50.8143	65.1432	63.8505	64.2421	25.4798	90.3969	93.9417	75.1184	90.4355	90.4909	90.4909	23.7726	77.6997	88.8915	71.1826	86.9125	85.7538	85.9679	25.3849	101.033	101.015	89.0201	98.7123	98.5608	98.5608	31.5576	86.4603	82.4062	79.8548	88.8872	87.8542	87.8542	26.9573	96.1422	94.8554	78.7602	91.6286	90.7115	90.7115	26.5622
27.0751	122.537	122.029	107.343	119.709	119.151	119.151	29.6056	64.9913	67.2268	52.2114	65.9783	64.6584	64.9833	26.276	93.8301	95.6778	77.2884	92.3326	92.1649	92.1648	24.5155	81.6639	88.7515	72.8124	87.6727	86.463	86.6238	26.1782	98.1063	102.257	90.7014	100.021	99.777	99.777	32.5437	84.8869	81.8692	80.8849	88.7454	87.6772	87.6772	27.7997	99.7477	95.8972	80.45	92.8715	91.895	91.895	27.3922
27.8955	116.929	122.219	109.147	120.461	119.758	119.758	30.5028	56.4437	67.0024	53.5628	66.6097	65.3012	65.56	27.0722	93.8745	97.0385	79.3888	93.9647	93.5985	93.5985	25.2584	84.2703	88.4779	74.3791	88.2385	87.0109	87.1204	26.9715	98.3159	103.275	92.2958	101.152	100.825	100.825	33.5299	88.2148	81.3117	81.8311	88.4823	87.4018	87.4018	28.6421	99.7022	96.6888	82.0739	93.9311	92.9161	92.9161	28.2223
28.716	118.853	122.139	110.808	120.963	120.139	120.139	31.3999	54.2915	66.6926	54.8632	67.0542	65.7908	65.9852	27.8685	89.5367	98.0487	81.4105	95.3391	94.8015	94.8015	26.0013	86.0284	88.1027	75.8772	88.6237	87.4081	87.4684	27.7648	105.525	104.077	93.7975	102.107	101.707	101.707	34.5161	90.3757	80.7342	82.6901	88.108	87.0357	87.0357	29.4845	94.8989	97.2485	83.6263	94.8133	93.7799	93.7799	29.0524
29.5365	122.655	121.815	112.318	121.224	120.305	120.305	32.297	53.8586	66.3232	56.1071	67.3277	66.1385	66.271	28.6647	89.6141	98.7372	83.3448	96.4647	95.7837	95.7837	26.7442	85.8506	87.65	77.3012	88.8415	87.6646	87.6784	28.558	107.886	104.67	95.2011	102.888	102.426	102.426	35.5023	83.6826	80.1371	83.459	87.632	86.5858	86.5858	30.327	89.6723	97.5958	85.1021	95.5246	94.4918	94.4918	29.8824
30.3569	118.445	121.274	113.671	121.258	120.267	120.267	33.1942	64.6243	65.9102	57.2893	67.4456	66.355	66.4288	29.461	98.4402	99.1353	85.183	97.3515	96.5555	96.5555	27.4871	87.798	87.1376	78.6459	88.9051	87.7898	87.76	29.3513	108.976	105.063	96.5016	103.501	102.988	102.988	36.4884	77.4035	79.521	84.135	87.0633	86.0589	86.0589	31.1694	91.639	97.7504	86.4961	96.0719	95.0573	95.0573	30.7125
31.1774	104.62	120.541	114.86	121.075	120.034	120.034	34.0913	67.109	65.4632	58.4048	67.4225	66.4502	66.4688	30.2572	97.8394	99.2749	86.9168	98.0105	97.1272	97.1272	28.23	89.0073	86.5779	79.9061	88.8267	87.7927	87.7224	30.1446	103.848	105.267	97.6941	103.949	103.396	103.396	37.4746	82.1484	78.8863	84.7158	86.4107	85.4613	85.4613	32.0118	94.3958	97.7322	87.8037	96.4622	95.482	95.482	31.5426
31.9978	107.078	119.641	115.88	120.688	119.619	119.619	34.9885	69.1001	64.988	59.4487	67.272	66.4336	66.4007	31.0535	91.536	99.1875	88.5383	98.453	97.5093	97.5093	28.9729	92.2413	85.9796	81.0771	88.6181	87.6819	87.5742	30.9379	102.289	105.292	98.7742	104.237	103.655	103.655	38.4608	91.0239	78.2336	85.1994	85.682	84.7987	84.7987	32.8542	93.1424	97.5603	89.0201	96.703	95.7718	95.7718	32.3726
32.8183	112.047	118.594	116.726	120.109	119.032	119.032	35.8856	62.4917	64.4877	60.4165	67.0068	66.3139	66.2337	31.8497	90.103	98.9032	90.0399	98.6911	97.7124	97.7124	29.7158	87.4683	85.3484	82.1545	88.2906	87.4654	87.3236	31.7312	104.762	105.151	99.7379	104.37	103.77	103.77	39.447	89.9308	77.5635	85.584	84.885	84.0768	84.0768	33.6966	91.471	97.2527	90.141	96.8018	95.9326	95.9326	33.2027
33.6388	111.057	117.42	117.394	119.35	118.285	118.284	36.7827	59.4296	63.9642	61.3039	66.639	66.0994	65.9761	32.6459	88.6629	98.4496	91.4146	98.737	97.7469	97.7469	30.4587	86.6435	84.6884	83.1341	87.8547	87.1509	86.9784	32.5244	104.687	104.855	100.582	104.355	103.746	103.746	40.4331	77.43	76.8764	85.8683	84.0265	83.3007	83.3007	34.539	86.6426	96.8263	91.1626	96.7664	95.9704	95.9704	34.0328
34.4592	107.618	116.137	117.881	118.425	117.387	117.387	37.6799	64.9903	63.4188	62.1069	66.1794	65.7978	65.6356	33.4422	95.4984	97.8519	92.6558	98.603	97.6229	97.6229	31.2016	89.0309	84.0023	84.012	87.3204	86.7458	86.5456	33.3177	95.2668	104.416	101.302	104.197	103.59	103.59	41.4193	75.5319	76.1728	86.0513	83.1135	82.4754	82.4754	35.3814	89.4349	96.2963	92.081	96.6043	95.8911	95.8911	34.8629
35.2797	110.186	114.759	118.186	117.346	116.35	116.35	38.577	70.4931	62.8524	62.8218	65.6383	65.4166	65.2196	34.2384	99.0778	97.1319	93.7576	98.3015	97.3506	97.3506	31.9444	89.7823	83.292	84.7848	86.6972	86.2568	86.0323	34.111	97.4456	103.846	101.897	103.903	103.306	103.306	42.4055	79.617	75.4535	86.1323	82.1519	81.6052	81.6052	36.2239	98.1894	95.6765	92.8929	96.3232	95.7007	95.7007	35.6929
36.1001	110.689	113.299	118.306	116.125	115.184	115.184	39.4742	62.9361	62.2658	63.4454	65.025	64.9624	64.7349	35.0347	92.6097	96.3089	94.7145	97.8445	96.9399	96.9399	32.6873	82.666	82.5587	85.4494	85.9938	85.6904	85.4447	34.9043	102.628	103.157	102.363	103.48	102.902	102.902	43.3916	81.466	74.7189	86.1111	81.1475	80.6947	80.6947	37.0663	94.0686	94.9789	93.5954	95.9307	95.4051	95.4051	36.523
36.9206	112.518	111.77	118.24	114.774	113.899	113.899	40.3713	55.164	61.6597	63.9748	64.3483	64.4418	64.1878	35.8309	89.9495	95.3991	95.5219	97.244	96.4002	96.4002	33.4302	78.8126	81.8036	86.0032	85.2184	85.0529	84.7891	35.6976	102.321	102.359	102.699	102.934	102.382	102.382	44.3778	77.0224	73.9696	85.9877	80.1058	79.7477	79.7477	37.9087	89.7342	94.2142	94.1859	95.4341	95.0101	95.0101	37.3531
37.741	113.878	110.18	117.99	113.305	112.505	112.505	41.2684	52.1162	61.0347	64.4076	63.6161	63.8607	63.5842	36.6272	90.6075	94.4158	96.1759	96.5117	95.741	95.741	34.1731	80.4342	81.0276	86.444	84.3786	84.35	84.0711	36.4908	101.667	101.463	102.904	102.272	101.753	101.753	45.364	64.6201	73.2063	85.7625	79.0316	78.7681	78.7681	38.7511	91.0763	93.3913	94.6621	94.8407	94.5214	94.5214	38.1831
38.5615	110.774	108.539	117.557	111.729	111.012	111.012	42.1656	56.1949	60.3916	64.7417	62.8356	63.2247	62.9295	37.4234	88.9941	93.3705	96.6732	95.6588	94.9712	94.9712	34.916	82.4509	80.2316	86.77	83.4817	83.5873	83.296	37.2841	96.8277	100.479	102.977	101.501	101.021	101.021	46.3502	63.8592	72.4294	85.4364	77.9296	77.7595	77.7595	39.5935	94.6328	92.5182	95.0225	94.1575	93.9447	93.9447	39.0132
39.382	105.413	106.853	116.941	110.056	109.429	109.428	43.0627	64.491	59.7311	64.9757	62.0134	62.5393	62.2289	38.2196	89.6973	92.2721	97.0113	94.6962	94.0996	94.0996	35.6589	81.0233	79.4164	86.9799	82.5342	82.7699	82.469	38.0774	95.0177	99.4162	102.918	100.628	100.191	100.191	47.3363	72.3998	71.6397	85.0105	76.8041	76.7252	76.7252	40.4359	93.8496	91.6014	95.2655	93.3915	93.2855	93.2855	39.8433
40.2024	108.392	105.128	116.147	108.299	107.764	107.763	43.9599	66.9326	59.054	65.1083	61.1556	61.8092	61.4871	39.0159	91.1568	91.1281	97.1886	93.6342	93.1344	93.1344	36.4018	72.6721	78.5826	87.0729	81.5423	81.9027	81.5949	38.8707	96.1351	98.2832	102.726	99.6603	99.271	99.271	48.3225	75.4657	70.8376	84.4863	75.6589	75.6682	75.6682	41.2784	95.4398	90.6465	95.3903	92.5492	92.5492	92.5492	40.6733
41.0229	112.019	103.369	115.178	106.465	106.026	106.026	44.857	60.8505	58.3608	65.139	60.2677	61.0392	60.7087	39.8121	91.2545	89.9445	97.2041	92.4829	92.0838	92.0838	37.1447	70.0498	77.7311	87.0485	80.5116	80.9904	80.678	39.664	93.2478	97.0879	102.403	98.6037	98.2656	98.2656	49.3087	74.7993	70.0239	83.8657	74.4978	74.5915	74.5915	42.1208	87.5389	89.658	95.3964	91.637	91.7411	91.7411	41.5034
41.8433	103.076	101.582	114.039	104.566	104.224	104.223	45.7541	56.5727	57.6525	65.0676	59.3548	60.2335	59.8976	40.6084	95.9074	88.7262	97.0578	91.2516	90.9553	90.9554	37.8876	74.9394	76.8627	86.9069	79.4474	80.0372	79.7227	40.4572	84.3152	95.8374	101.95	97.4654	97.1809	97.181	50.2949	71.4114	69.1991	83.1509	73.3239	73.498	73.498	42.9632	87.1858	88.6399	95.2839	90.6611	90.8663	90.8663	42.3335
42.6638	93.662	99.769	112.734	102.61	102.364	102.364	46.6513	57.282	56.9297	64.8945	58.4212	59.3962	59.0578	41.4046	97.4637	87.4773	96.7504	89.9494	89.7565	89.7565	38.6305	76.7585	75.9782	86.6486	78.3545	79.0474	78.7329	41.2505	81.9737	94.5384	101.368	96.252	96.0229	96.0229	51.281	76.2266	68.3638	82.3443	72.1405	72.39	72.39	43.8056	84.8462	87.5954	95.053	89.6273	89.9297	89.9297	43.1635
43.4842	97.6773	97.935	111.27	100.606	100.455	100.455	47.5484	63.9369	56.1932	64.6205	57.4712	58.5311	58.1929	42.2009	93.2123	86.201	96.2835	88.5848	88.4941	88.4941	39.3734	72.1192	75.0783	86.2747	77.2374	78.0248	77.7123	42.0438	88.1241	93.1967	100.66	94.9698	94.797	94.797	52.2672	80.6515	67.5187	81.4487	70.9503	71.27	71.27	44.648	85.7293	86.5272	94.7048	88.5412	88.936	88.936	43.9936
44.3047	96.8958	96.0827	109.652	98.5617	98.5038	98.5035	48.4456	66.7007	55.4438	64.2468	56.5085	57.6417	57.3062	42.9971	90.4929	84.9003	95.6593	87.1657	87.1749	87.175	40.1163	69.5947	74.1638	85.7867	76.1001	76.9729	76.6644	42.8371	88.5302	91.8177	99.8285	93.6251	93.509	93.509	53.2534	84.4077	66.6644	80.4672	69.7558	70.1403	70.1403	45.4904	84.9072	85.4378	94.2404	87.4082	87.89	87.89	44.8237
45.1252	96.5449	94.2149	107.89	96.4848	96.5165	96.5163	49.3427	59.0384	54.6823	63.7752	55.5365	56.7313	56.4007	43.7933	89.5756	83.5775	94.881	85.6995	85.8053	85.8053	40.8592	69.9261	73.2355	85.1866	74.9466	75.8953	75.5926	43.6303	84.4028	90.4063	98.8767	92.2239	92.1641	92.1641	54.2396	80.2914	65.8014	79.4032	68.5595	69.0029	69.0029	46.3328	79.6267	84.3292	93.6616	86.2333	86.7961	86.7961	45.6537
45.9456	90.2663	92.3345	105.99	94.3824	94.4998	94.4995	50.2398	54.8287	53.9094	63.2079	54.558	55.8029	55.4794	44.5896	90.5583	82.2348	93.9524	84.1934	84.3912	84.3912	41.6021	71.8857	72.2942	84.4767	73.7801	74.7952	74.4998	44.4236	82.7509	88.9667	97.8081	90.7722	90.7676	90.7676	55.2257	71.4586	64.9305	78.2603	67.3635	67.8599	67.8599	47.1753	74.3539	83.203	92.9706	85.0213	85.6586	85.6586	46.4838
46.7661	88.0673	90.4439	103.96	92.2613	92.4594	92.4592	51.137	50.2703	53.1259	62.5475	53.5759	54.8594	54.5449	45.3858	86.9444	80.8743	92.878	82.6538	82.9382	82.9382	42.345	73.0606	71.3408	83.6598	72.6039	73.6755	73.389	45.2169	87.8507	87.5028	96.6268	89.2755	89.3247	89.3247	56.2119	79.1045	64.0522	77.0422	66.1696	66.7129	66.7129	48.0177	73.0786	82.0608	92.1698	83.7769	84.4816	84.4816	47.3139
47.5865	87.9313	88.5454	101.81	90.1275	90.4011	90.4008	52.0341	47.9116	52.3326	61.7971	52.5926	53.9035	53.5998	46.1821	79.5602	79.4978	91.6631	81.0868	81.4518	81.4518	43.0879	72.1939	70.376	82.7392	71.4208	72.5391	72.2628	46.0102	90.0286	86.0182	95.337	87.7393	87.8401	87.8401	57.1981	79.5523	63.1671	75.7531	64.9798	65.5638	65.5638	48.8601	77.2231	80.9042	91.2623	82.5042	83.2691	83.2691	48.1439
48.407	88.0766	86.6415	99.5479	87.9868	88.33	88.3298	52.9313	52.9947	51.5303	60.96	51.6103	52.9376	52.6462	46.9783	77.8109	78.107	90.3135	79.4981	79.9369	79.9369	43.8308	72.7621	69.4006	81.7185	70.2335	71.3886	71.1238	46.8035	92.6376	84.516	93.9436	86.1687	86.3187	86.3187	58.1843	77.2929	62.2759	74.3972	63.7956	64.414	64.414	49.7025	78.4225	79.7344	90.2513	81.2073	82.0248	82.0248	48.974
49.2274	87.5666	84.7342	97.1841	85.8445	86.2511	86.2508	53.8284	53.2168	50.7197	60.04	50.6309	51.964	51.6863	47.7745	80.3903	76.7036	88.8356	77.8928	78.3984	78.3984	44.5737	71.4401	68.4155	80.6017	69.0443	70.2265	69.9744	47.5967	84.106	82.9991	92.4515	84.5688	84.7651	84.7651	59.1704	71.3154	61.3791	72.9788	62.6185	63.2651	63.2651	50.5449	72.6326	78.5526	89.1404	79.8901	80.7523	80.7523	49.8041
50.0479	82.9505	82.8257	94.7281	83.7055	84.1689	84.1687	54.7255	46.913	49.9017	59.0414	49.6561	50.9848	50.7221	48.5708	79.6131	75.2893	87.2365	76.2759	76.8405	76.8406	45.3165	74.6704	67.4214	79.393	67.8555	69.0553	68.8168	48.39	80.5299	81.4701	90.8663	82.9441	83.1835	83.1835	60.1566	74.7619	60.4774	71.5024	61.4497	62.1184	62.1184	51.3873	67.3047	77.36	87.9337	78.5561	79.4551	79.4551	50.6341
50.8684	84.4933	80.9181	92.1898	81.5743	82.0877	82.0875	55.6227	41.3244	49.077	57.9683	48.6875	50.0021	49.7554	49.367	70.2738	73.8656	85.5236	74.6517	75.2677	75.2677	46.0594	77.0968	66.4191	78.0971	66.669	67.8769	67.653	49.1833	82.3632	79.9314	89.1934	81.2993	81.5781	81.5781	61.1428	74.5952	59.5714	69.9728	60.2904	60.9752	60.9752	52.2298	71.7886	76.1577	86.6354	77.2087	78.1366	78.1366	51.4642
51.6888	86.7426	79.0132	89.5791	79.4549	80.0115	80.0114	56.5198	40.6282	48.2464	56.8256	47.7265	49.0175	48.7879	50.1633	66.2107	72.4341	83.7048	73.0243	73.6836	73.6836	46.8023	75.623	65.4095	76.7189	65.4866	66.6935	66.485	49.9766	82.1451	78.3851	87.4388	79.6385	79.9531	79.9531	62.129	76.3396	58.6617	68.3946	59.1418	59.8366	59.8366	53.0722	78.4888	74.9467	85.25	75.8509	76.7997	76.7997	52.2943
52.5093	87.4539	77.113	86.9062	77.3511	77.944	77.9438	57.417	48.5206	47.4107	55.6182	46.7742	48.0328	47.8211	50.9595	62.8021	70.9963	81.7883	71.3974	72.092	72.0921	47.5452	68.6649	64.3933	75.2635	64.3099	65.5069	65.3145	50.7699	80.9589	76.8333	85.6086	77.9658	78.3121	78.3121	63.1151	67.1384	57.7487	66.7727	58.0047	58.7037	58.7037	53.9146	81.2855	73.7282	83.7824	74.4857	75.4475	75.4475	53.1243
53.3297	87.7452	75.2194	84.1812	75.2662	75.8885	75.8884	58.3141	54.8737	46.5706	54.3512	45.8316	47.0496	46.8565	51.7558	65.1997	69.5537	79.7827	69.7744	70.4963	70.4963	48.2881	69.0375	63.3713	73.7362	63.1404	64.319	64.1433	51.5631	78.0853	75.2779	83.7089	76.2849	76.6588	76.6588	64.1013	57.203	56.8333	65.1118	56.8799	57.5776	57.5776	54.757	75.1934	72.5032	82.2377	73.1157	74.0828	74.0828	53.9544
54.1502	90.3809	73.3342	81.4141	73.2034	73.8481	73.848	59.2112	51.8714	45.7269	53.0298	44.8998	46.0692	45.8953	52.552	69.6381	68.1078	77.6967	68.1585	68.8996	68.8996	49.031	69.1181	62.3444	72.1425	61.9794	63.1313	62.9728	52.3564	77.1876	73.7206	81.7463	74.5993	74.9966	74.9966	65.0875	57.3129	55.9158	63.4169	55.7682	56.4591	56.4591	55.5994	67.2225	71.2726	80.621	71.7435	72.7082	72.7082	54.7845
54.9706	89.8212	71.459	78.6148	71.1652	71.8258	71.8257	60.1084	49.7783	44.8803	51.6595	43.9795	45.093	44.9387	53.3482	69.8241	66.66	75.5393	66.5523	67.3049	67.3049	49.7739	69.9184	61.3132	70.4882	60.8279	61.9454	61.8045	53.1497	76.921	72.1631	79.727	72.9125	73.3287	73.3287	66.0736	60.3681	54.9969	61.6928	54.6703	55.3491	55.3491	56.4418	66.5974	70.0376	78.9377	70.3715	71.3263	71.3263	55.6146
55.7911	91.0559	69.5956	75.793	69.1543	69.8241	69.824	61.0055	46.6735	44.0315	50.2458	43.0714	44.1221	43.9879	54.1445	63.8007	65.2118	73.3196	64.9584	65.7147	65.7147	50.5168	66.2709	60.2786	68.7791	59.6872	60.7627	60.6398	53.943	78.4266	70.607	77.6577	71.2274	71.6583	71.6583	67.0598	55.0807	54.0772	59.9443	53.5867	54.2483	54.2483	57.2843	71.7201	68.7989	77.1935	69.0016	69.9394	69.9394	56.4446
56.6116	84.6697	67.7455	72.9582	67.1726	67.8453	67.8452	61.9027	47.4813	43.1813	48.7942	42.1761	43.1578	43.0439	54.9407	63.186	63.7645	71.0466	63.3792	64.1317	64.1317	51.2597	60.0109	59.2412	67.021	58.5581	59.5846	59.4798	54.7363	75.8056	69.0536	75.5449	69.547	69.9882	69.9882	68.046	50.9718	53.1571	58.1763	52.5178	53.1575	53.1575	58.1267	73.1557	67.5576	75.3938	67.6361	68.5498	68.5498	57.2747
57.432	80.3677	65.9104	70.1196	65.2222	65.8916	65.8916	62.7998	52.7638	42.3304	47.3103	41.294	42.2009	42.1075	55.737	67.3898	62.3194	68.7295	61.8165	62.5582	62.5582	52.0026	62.1473	58.2019	65.2199	57.4414	58.4121	58.3258	55.5295	71.2102	67.5045	73.3951	67.874	68.3212	68.3212	69.0322	52.0856	52.2373	56.3933	51.4642	52.0773	52.0773	58.9691	71.2927	66.3147	73.5445	66.2766	67.1595	67.1595	58.1048
58.2525	81.4256	64.0916	67.2861	63.3047	63.9651	63.965	63.6969	52.1216	41.4794	45.7996	40.4256	41.2524	41.1795	56.5332	71.1064	60.878	66.3773	60.2723	60.9961	60.9961	52.7455	64.6115	57.1614	63.3816	56.3378	57.2465	57.1788	56.3228	74.2009	65.9609	71.2149	66.2107	66.6597	66.6597	70.0183	55.2942	51.3183	54.6002	50.4261	51.0083	51.0083	59.8115	65.6335	65.0711	71.6513	64.9248	65.7706	65.7706	58.9348
59.0729	81.3483	62.2906	64.466	61.4216	62.0673	62.0672	64.5941	43.7791	40.6291	44.2678	39.5713	40.3131	40.2609	57.3295	71.3806	59.4414	63.999	58.748	59.4476	59.4476	53.4884	63.9696	56.1204	61.5122	55.248	56.0888	56.0397	57.1161	75.0704	64.4242	69.0106	64.5596	65.0062	65.0062	71.0045	59.3726	50.4006	52.8013	49.4039	49.951	49.951	60.6539	66.6703	63.8276	69.72	63.5823	64.3848	64.3848	59.7649
59.8934	77.0487	60.5088	61.6676	59.574	60.1998	60.1997	65.4912	40.8321	39.7802	42.7202	38.7312	39.3838	39.3521	58.1257	71.5741	58.0109	61.6031	57.2452	57.9142	57.9142	54.2313	59.6926	55.0796	59.6175	54.1725	54.9399	54.9094	57.9094	74.3111	62.8955	66.7887	62.9226	63.3628	63.3628	71.9907	57.4275	49.4846	51.001	48.3977	48.9059	48.9059	61.4963	71.7557	62.5852	67.7564	62.2505	63.0039	63.0039	60.595
60.7138	63.392	58.7474	58.8983	57.763	58.3639	58.3639	66.3884	39.3771	38.9332	41.1621	37.9057	38.4651	38.4539	58.9219	67.0155	56.5877	59.1982	55.7651	56.3977	56.3977	54.9742	55.7887	54.0398	57.7034	53.1117	53.8007	53.7888	58.7026	68.2746	61.3761	64.5551	61.3018	61.7316	61.7316	72.9769	51.4658	48.571	49.2037	47.4079	47.8735	47.8735	62.3387	73.9349	61.3447	65.7661	60.9305	61.6295	61.6295	61.425
61.5343	59.3894	57.0076	56.1654	55.9895	56.561	56.561	67.2855	43.5195	38.0888	39.5987	37.0948	37.5577	37.5667	59.7182	70.5748	55.1731	56.7926	54.3086	54.8994	54.8994	55.7171	59.1733	53.0015	55.7754	52.0662	52.672	52.6786	59.4959	67.3246	59.8671	62.3161	59.6988	60.1145	60.1145	73.963	46.4199	47.6602	47.4134	46.4344	46.8541	46.8541	63.1812	68.2628	60.107	63.7549	59.6237	60.2631	60.2631	62.2551
62.3548	59.9291	55.2906	53.4756	54.2541	54.7919	54.7919	68.1826	44.6743	37.2477	38.035	36.2987	36.662	36.6911	60.5144	69.4664	53.768	54.394	52.8768	53.4207	53.4207	56.46	61.2963	51.9655	53.8392	51.0361	51.5545	51.5795	60.2892	68.2357	58.3694	60.0775	58.1153	58.5134	58.5134	74.9492	46.4611	46.7526	45.6339	45.4775	45.848	45.848	64.0236	67.556	58.8729	61.7282	58.3309	58.9061	58.9061	63.0852
63.1752	57.9483	53.5974	50.8349	52.5573	53.0576	53.0576	69.0798	43.4335	36.4104	36.4758	35.5175	35.7787	35.8275	61.3107	60.5713	52.3736	52.0099	51.4703	51.9627	51.9627	57.2028	61.3372	50.9324	51.9003	50.0218	50.449	50.4921	61.0825	68.7691	56.8843	57.8448	56.5527	56.9296	56.9296	75.9354	47.4744	45.8489	43.8692	44.5371	44.8556	44.8556	64.866	67.8239	57.6433	59.6917	57.0532	57.5598	57.5598	63.9152
63.9957	53.0792	51.9291	48.2491	50.8995	51.3588	51.3588	69.9769	38.9659	35.5775	34.9257	34.7511	34.9081	34.9763	62.1069	55.4646	50.991	49.6477	50.0899	50.5265	50.5265	57.9457	53.8864	49.9029	49.9637	49.0235	49.3559	49.4169	61.8758	67.2649	55.4125	55.6235	55.0122	55.3649	55.3649	76.9216	42.438	44.9493	42.1226	43.6133	43.8772	43.8772	65.7084	69.8582	56.4189	57.6505	55.7914	56.2253	56.2253	64.7453
64.8161	43.7837	50.2866	45.7232	49.2811	49.6961	49.6961	70.8741	36.4262	34.7496	33.3891	33.9996	34.0505	34.1378	62.9032	51.6768	49.6211	47.3138	48.736	49.1129	49.1129	58.6886	50.5662	48.8775	48.0346	48.0414	48.2758	48.3545	62.669	58.4195	53.9552	53.4188	53.495	53.8204	53.8204	77.9077	40.8203	44.0544	40.3975	42.7062	42.9129	42.9129	66.5508	72.2971	55.2005	55.6098	54.5461	54.9037	54.9037	65.5754
65.6366	47.6439	48.6707	43.2617	47.7021	48.0699	48.07	71.7712	39.3799	33.9272	31.8702	33.263	33.2063	33.3122	63.6994	49.1059	48.2649	45.0145	47.4091	47.7228	47.7228	59.4315	54.8979	47.8569	46.1178	47.0756	47.2093	47.3054	63.4623	56.7996	52.5131	51.2356	52.0021	52.2974	52.2974	78.8939	37.6718	43.1645	38.6971	41.8156	41.963	41.963	67.3932	65.6461	53.9888	53.5747	53.3181	53.5961	53.5961	66.4054
66.4571	49.6264	47.0822	40.8687	46.1625	46.4807	46.4808	72.6683	41.1831	33.1109	30.3726	32.5411	32.3758	32.4999	64.4956	43.5759	46.9233	42.7558	46.1094	46.3569	46.3569	60.1744	56.6676	46.8417	44.2178	46.1261	46.1567	46.2698	64.2556	57.7017	51.0871	49.0784	50.5344	50.7971	50.7971	79.8801	39.6945	42.2802	37.0243	40.9416	41.0276	41.0276	68.2357	59.6952	52.7845	51.5498	52.1079	52.3034	52.3034	67.2355
67.2775	47.5837	45.522	38.5477	44.6622	44.9287	44.9288	73.5655	38.803	32.3011	28.9001	31.8339	31.5593	31.7011	65.2919	41.1036	45.5971	40.5428	44.8373	45.0157	45.0157	60.9173	55.3093	45.8325	42.339	45.1931	45.1184	45.2482	65.0489	57.8491	49.678	46.9516	49.0927	49.3203	49.3203	80.8663	43.8118	41.4017	35.3818	40.084	40.1069	40.1069	69.0781	66.6662	51.5884	49.5397	50.916	51.0263	51.0263	68.0656
68.098	42.7367	43.9905	36.3017	43.2012	43.414	43.4141	74.4626	34.0305	31.4984	27.4559	31.1412	30.7568	30.9158	66.0881	37.2436	44.2872	38.3803	43.5927	43.6998	43.6998	61.6602	50.8255	44.8297	40.4854	44.2766	44.0948	44.241	65.8422	56.0815	48.2866	44.8593	47.6776	47.8681	47.8681	81.8524	41.0355	40.5296	33.7719	39.2427	39.2009	39.2009	69.9205	72.2574	50.4012	47.5487	49.7428	49.7656	49.7656	68.8956
68.9184	37.6688	42.4885	34.133	41.7792	41.9367	41.9368	75.3598	32.0636	30.7032	26.0431	30.4629	29.9686	30.1443	66.8844	36.083	42.9943	36.2727	42.3758	42.4096	42.4096	62.4031	47.3856	43.8339	38.6608	43.3764	43.0862	43.2483	66.6354	53.6323	46.9136	42.8051	46.2896	46.441	46.441	82.8386	38.1757	39.6641	32.1971	38.4177	38.3098	38.3098	70.7629	76.751	49.2234	45.581	48.5887	48.5221	48.5221	69.7257
69.7389	34.8361	41.0164	32.0437	40.3958	40.4968	40.497	76.2569	31.0866	29.916	24.6642	29.799	29.1948	29.3867	67.6806	38.6242	41.7192	34.2238	41.1866	41.1455	41.1455	63.146	50.59	42.8457	36.8687	42.4927	42.0928	42.2704	67.4287	52.2696	45.5596	40.7925	44.9293	45.0399	45.0399	83.8248	35.0778	38.8056	30.6593	37.6087	37.4336	37.4336	71.6053	77.786	48.0557	43.6404	47.454	47.2964	47.2964	70.5558
70.5593	31.2338	39.5748	30.0353	39.0506	39.0943	39.0944	77.154	32.1527	29.1371	23.3217	29.1491	28.4354	28.643	68.4769	40.2154	40.4625	32.2368	40.0251	39.9076	39.9076	63.8889	51.5378	41.8656	35.1123	41.6253	41.1149	41.3075	68.222	47.3143	44.2253	38.8245	43.597	43.6653	43.6653	84.8109	36.1628	37.9545	29.1602	36.8157	36.5723	36.5723	72.4477	61.4209	46.8987	41.7304	46.3389	46.0888	46.0889	71.3858
71.3798	29.6724	38.164	28.1086	37.7433	37.7289	37.729	78.0512	32.3529	28.3671	22.0178	28.5132	27.6906	27.9132	69.2731	41.4193	39.2249	30.3147	38.8909	38.6962	38.6962	64.6318	50.9014	40.8939	33.3945	40.7741	40.1526	40.3598	69.0153	50.2059	42.9112	36.9041	42.2929	42.3176	42.3176	85.7971	36.0055	37.1112	27.7016	36.0384	35.726	35.726	73.2901	54.5446	45.7529	39.8544	45.2435	44.9001	44.9001	72.2159
72.2003	26.4266	36.7843	26.2645	36.4734	36.4003	36.4005	78.9483	27.4325	27.6062	20.7542	27.891	26.9604	27.1975	70.0693	38.9625	38.007	28.4597	37.7841	37.5114	37.5114	65.3747	44.3099	39.9312	31.718	39.9391	39.206	39.4274	69.8086	48.7279	41.6179	35.0335	41.0172	40.9974	40.9974	86.7833	36.0706	36.2758	26.2846	35.2768	34.8946	34.8946	74.1326	49.0455	44.619	38.0153	44.1681	43.7305	43.7305	73.046
73.0207	24.2669	35.4361	24.5029	35.2402	35.1084	35.1086	79.8455	25.0311	26.8549	19.5325	27.2824	26.2447	26.4958	70.8656	36.8763	36.8092	26.6738	36.7044	36.3532	36.3532	66.1176	36.8345	38.9779	30.0851	39.1201	38.2753	38.5104	70.6018	41.7302	40.3458	33.215	39.7702	39.7048	39.7048	87.7695	31.2292	35.4488	24.9106	34.5305	34.0782	34.0782	74.975	34.6416	43.4974	36.216	43.1127	42.5805	42.5805	73.876
73.8412	23.7627	34.1196	22.8238	34.0432	33.8527	33.8529	80.7426	22.8272	26.1134	18.3539	26.6871	25.5436	25.808	71.6618	35.5874	35.6321	24.9584	35.6515	35.2218	35.2218	66.8605	31.1378	38.0344	28.4978	38.3169	37.3607	37.609	71.3951	33.1342	39.0955	31.4504	38.5518	38.4403	38.4403	88.7556	29.3195	34.6305	23.5803	33.7995	33.2767	33.2767	75.8174	31.103	42.3886	34.4589	42.0774	41.4503	41.4503	74.7061
74.6616	22.4491	32.8349	21.2264	32.8818	32.633	32.6331	81.6397	19.7608	25.3821	17.2194	26.1049	24.8571	25.1342	72.4581	34.637	34.4762	23.3143	34.6251	34.117	34.117	67.6034	29.0746	37.1011	26.9578	37.5294	36.462	36.7231	72.1884	25.4928	37.8673	29.7413	37.3621	37.2038	37.2038	89.7418	27.2207	33.821	22.2946	33.0835	32.49	32.49	76.6598	28.9774	41.2931	32.7463	41.0622	40.3402	40.3402	75.5362
75.4821	20.365	31.5822	19.71	31.7555	31.4486	31.4488	82.5369	15.9029	24.6614	16.1297	25.5357	24.185	24.4743	73.2543	31.8847	33.3417	21.7424	33.6249	33.0387	33.0387	68.3463	26.8376	36.1784	25.4667	36.7575	35.5795	35.8528	72.9817	21.6008	36.6616	28.089	36.2009	35.9957	35.9957	90.728	25.3413	33.0208	21.054	32.3823	31.7181	31.7181	77.5022	24.7067	40.2113	31.0801	40.067	39.2504	39.2504	76.3663
76.3025	19.4479	30.3614	18.2733	30.6634	30.2992	30.2994	83.434	12.7823	23.9514	15.0853	24.9792	23.5273	23.8281	74.0505	29.0082	32.2292	20.2426	32.6506	31.9869	31.9869	69.0892	22.6369	35.2667	24.0257	36.0009	34.713	34.998	73.775	21.9086	35.4787	26.4943	35.0683	34.8159	34.8159	91.7142	22.6486	32.2299	19.8588	31.6956	30.9609	30.9609	78.3446	22.3556	39.1437	29.4619	39.0918	38.1811	38.1811	77.1963
77.123	18.4985	29.1727	16.9148	29.6049	29.1842	29.1844	84.3312	13.3216	23.2524	14.0864	24.4351	22.8839	23.1957	74.8468	26.5959	31.1388	18.815	31.7017	30.9613	30.9613	69.832	20.3389	34.3662	22.6357	35.2594	33.8626	34.1589	74.5682	21.8786	34.3189	24.9581	33.9639	33.6645	33.6645	92.7003	20.397	31.4487	18.7092	31.0233	30.2183	30.2183	79.1871	19.9459	38.0906	27.8933	38.1365	37.1325	37.1325	78.0264
77.9435	17.5219	28.016	15.6328	28.5793	28.1031	28.1033	85.2283	12.7752	22.5647	13.1331	23.9033	22.2547	22.5769	75.643	24.2016	30.071	17.4589	30.7779	29.9617	29.9617	70.5749	18.9944	33.4774	21.2974	34.533	33.0283	33.3353	75.3615	20.7138	33.1825	23.4807	32.8877	32.5413	32.5413	93.6865	17.8722	30.6774	17.6052	30.3652	29.4901	29.4901	80.0295	19.1551	37.0524	26.3753	37.201	36.1045	36.1045	78.8565
78.7639	13.9053	26.8911	14.4254	27.5859	27.0553	27.0555	86.1254	12.618	21.8884	12.2251	23.3835	21.6396	21.9716	76.4393	19.5293	29.0259	16.1736	29.8787	28.988	28.988	71.3178	16.2137	32.6004	20.0112	33.8213	32.2099	32.5273	76.1548	17.7841	32.0696	22.0624	31.8393	31.4463	31.4463	94.6727	15.626	29.9162	16.5468	29.7209	28.7764	28.7764	80.8719	17.2343	36.0294	24.9089	36.2852	35.0972	35.0972	79.6865
79.5844	10.1097	25.798	13.2904	26.624	26.0403	26.0405	87.0226	11.7451	21.2239	11.3621	22.8754	21.0384	21.3797	77.2355	14.8932	28.0036	14.958	29.0037	28.0398	28.0398	72.0607	12.0686	31.7356	18.7774	33.1241	31.4076	31.7346	76.9481	13.2051	30.9804	20.7031	30.8185	30.3794	30.3794	95.6589	12.0956	29.1653	15.5335	29.0903	28.0768	28.0768	81.7143	14.1272	35.022	23.4948	35.389	34.1108	34.1108	80.5166
80.4048	6.77376	24.7364	12.2255	25.6928	25.0573	25.0575	87.9197	10.5029	20.5712	10.5434	22.379	20.4511	20.801	78.0318	9.8134	27.0045	13.8107	28.1525	27.1169	27.1169	72.8036	8.27361	30.8832	17.5958	32.4413	30.621	30.9574	77.7413	8.98844	29.9151	19.4026	29.8249	29.3404	29.3403	96.645	8.75963	28.4248	14.5649	28.4732	27.3915	27.3915	82.5567	10.9383	34.0304	22.1333	34.512	33.145	33.145	81.3467
81.2253	4.32116	23.7062	11.2284	24.7916	24.1058	24.1061	88.8169	7.31887	19.9304	9.7684	21.8938	19.8773	20.2354	78.828	5.54073	26.0285	12.7302	27.3246	26.2188	26.2188	73.5465	5.35365	30.0436	16.4665	31.7726	29.8503	30.1954	78.5346	5.15837	28.8738	18.1604	28.8583	28.3289	28.3289	97.6312	5.23818	27.6949	13.6405	27.8693	26.72	26.72	83.3991	6.74484	33.0549	20.8249	33.6542	32.2	32.2	82.1767
[truncated: 6 more columns]

## Sheet: WAT-149
spike_1							spike_2							spike_3							spike_4							spike_5							spike_6							spike_7
Z-axis_1	Thickness-profile_1	skewed gaussian_1	gaussian_1	lognorm_1	gamma_1	chi2_1	Z-axis_2	Thickness-profile_2	skewed gaussian_2	gaussian_2	lognorm_2	gamma_2	chi2_2	Z-axis_3	Thickness-profile_3	skewed gaussian_3	gaussian_3	lognorm_3	gamma_3	chi2_3	Z-axis_4	Thickness-profile_4	skewed gaussian_4	gaussian_4	lognorm_4	gamma_4	chi2_4	Z-axis_5	Thickness-profile_5	skewed gaussian_5	gaussian_5	lognorm_5	gamma_5	chi2_5	Z-axis_6	Thickness-profile_6	skewed gaussian_6	gaussian_6	lognorm_6	gamma_6	chi2_6	Z-axis_7	Thickness-profile_7	skewed gaussian_7	gaussian_7	lognorm_7	gamma_7	chi2_7
0	2.98576	0.673187	8.7419	0.0308146	0	0	0	1.61964	2.98451	9.95124	1.03682	0	0	0	1.64876	0.28596	6.2377	0.00132333	0	0	0	1.55314	0.00109192	1.95259	0	0	0	0	0.82408	0.947996	9.49898	0.00737824	0	0	0	1.14793	0.0466608	1.27444	1.34949e-05	0	0	0	1.40632	0.00108691	1.53025	0	0	0
0.935333	3.10343	0.876441	9.46142	0.0769899	0	0	0.834202	1.48094	3.50577	10.7261	1.4283	0.000619431	0.000624171	0.877766	1.32276	0.384513	6.79065	0.00603906	0	0	0.663967	1.18637	0.00186526	2.21294	0	0	0	0.726345	3.07185	1.20372	10.3083	0.0252079	0	0	0.680912	1.16878	0.0628838	1.44896	5.71748e-05	0	0	0.645458	1.4237	0.00181344	1.73864	0	0	0
1.87067	2.49259	1.13141	10.2256	0.166722	0	0	1.6684	1.58325	4.0997	11.5464	1.91934	0.0531579	0.0532209	1.75554	1.44515	0.512318	7.38183	0.0202639	0	0	1.32794	1.1061	0.0031417	2.50287	0	0	0	1.45269	2.49372	1.51772	11.1712	0.0686795	0	0	1.36182	1.26631	0.0841746	1.64401	0.000202469	0	0	1.29091	1.58315	0.00298636	1.97126	0	0	0
2.806	3.19182	1.44824	11.0359	0.322838	0	0	2.50261	1.93278	4.77297	12.4135	2.5222	0.250644	0.250783	2.6333	2.00431	0.676407	8.01275	0.0545793	0	0	1.99191	1.15712	0.00521772	2.82495	0	0	0	2.17903	2.81822	1.90028	12.0896	0.158275	0	0	2.04274	1.62903	0.111914	1.86148	0.000618416	0	0	1.93637	2.03305	0.0048543	2.2303	0	0	0
3.74133	3.69098	1.83827	11.8935	0.571694	0	0	3.33681	2.42969	5.53228	13.3286	3.24812	0.64563	0.645842	3.51107	2.5169	0.884983	8.68487	0.124813	0	0	2.65587	1.34431	0.0085448	3.18194	0	0	0	2.90538	3.24901	2.36275	13.0655	0.320924	0	0	2.72364	2.03227	0.147795	2.10339	0.00166914	0	0	2.58183	2.40176	0.00778874	2.51807	0	0	0
4.67666	3.17866	2.31391	12.7996	0.941339	0	0	4.17101	3.14913	6.38422	14.2926	4.10702	1.26761	1.26788	4.38884	2.18372	1.14747	9.39962	0.251695	0	0	3.31984	1.68907	0.0137989	3.57667	0	0	0	3.63172	3.49558	2.91747	14.1008	0.5885	0	0	3.40456	2.06604	0.193871	2.37187	0.00405757	0	0	3.22728	1.31044	0.0123361	2.83699	0	0	0
5.61199	3.94748	2.88852	13.7551	1.45953	0	0	5.00521	4.34263	7.33522	15.3067	5.10713	2.13135	2.13167	5.26661	1.94115	1.47451	10.1583	0.459658	0	0	3.98381	1.98411	0.0219746	4.01211	0	0	0	4.35806	3.07491	3.5777	15.1972	0.995603	0	0	4.08547	1.09955	0.252611	2.66913	0.00901977	0	0	3.87274	1.33929	0.0192873	3.18958	0	0	0
6.54732	4.34304	3.57617	14.7611	2.15182	0	0	5.83941	5.73661	8.39134	16.3717	6.25481	3.24125	3.2416	6.14438	2.57004	1.87792	10.9622	0.77509	0	0	4.64778	1.92363	0.0345106	4.49131	0	0	0	5.0844	3.28088	4.35738	16.3562	1.57704	0	0	4.76638	1.12363	0.326955	2.99748	0.0185617	0	0	4.5182	1.74793	0.0297691	3.57844	4.51815e-33	0	0
7.48265	4.31565	4.3914	15.8181	3.03999	0.149764	0.149836	6.67361	6.59309	9.55817	17.4883	7.55433	4.5941	4.59447	7.02214	2.97639	2.37056	11.8124	1.22436	0	0	5.31175	1.37361	0.0534508	5.01741	3.98482e-21	0	0	5.81075	3.20294	5.27097	17.5795	2.36547	0	0	5.44729	1.3786	0.420366	3.35932	0.0357197	0	0	5.16365	2.229	0.0453602	4.00628	3.58181e-13	0	0
8.41798	4.06386	5.34878	16.9268	4.14085	0.838423	0.838561	7.50782	5.37611	10.8407	18.6569	9.0078	6.18109	6.18146	7.89991	2.95525	2.96619	12.71	1.83196	0	0	5.97572	1.07435	0.0816484	5.59363	2.38361e-10	0	0	6.53709	3.07791	6.33315	18.8682	3.38927	0	0	6.1282	1.81172	0.536885	3.7571	0.0648166	0	0	5.80911	2.37691	0.0682364	4.47582	9.22802e-09	0	0
9.35332	3.86277	6.46256	18.0876	5.46552	2.0445	2.04468	8.34202	3.64197	12.2431	19.8781	10.6151	7.98928	7.98964	8.77768	2.93643	3.67915	13.6558	2.61887	0	0	6.63969	1.46166	0.123013	6.2232	5.49505e-07	0	0	7.26344	3.91629	7.55847	20.2235	4.67111	0	0	6.80911	2.10394	0.681177	4.19338	0.111682	0	0	6.45457	2.72741	0.101347	4.98989	1.82332e-06	0	0
10.2886	5.58212	7.74608	19.3005	7.01908	3.70644	3.70663	9.17622	3.6257	13.7688	21.152	12.374	10.0027	10.0031	9.65545	3.66265	4.52402	14.6505	3.60144	0.00619662	0.00415474	7.30366	1.81264	0.182807	6.90941	3.83816e-05	0	0	7.98978	5.18805	8.96098	21.6464	6.22689	0.596059	0.593399	7.49002	1.37857	0.858569	4.67071	0.183805	0.000108158	0.000107443	7.10003	2.84631	0.14862	5.5513	5.38147e-05	0	0
11.224	7.4863	9.21132	20.5656	8.80071	5.76107	5.76126	10.0104	4.47091	15.4199	22.4785	14.2802	12.2035	12.2038	10.5332	4.7326	5.51523	15.6947	4.7906	0.588244	0.57489	7.96763	2.04388	0.267974	7.65551	0.000619003	0	0	8.71612	6.42346	10.5538	23.1375	8.06532	2.18156	2.17781	8.17093	1.19879	1.07507	5.1917	0.290385	0.00378058	0.00377167	7.74548	2.34687	0.215197	6.16287	0.000592086	0	0
12.1593	8.26809	10.8682	21.8825	10.8039	8.14757	8.14776	10.8446	6.54467	17.1975	23.8575	16.3272	14.572	14.5723	11.411	4.72954	6.66648	16.7888	6.1916	1.87094	1.85318	8.63159	2.25169	0.387503	8.46475	0.00454762	0	0	9.44246	6.37444	12.3486	24.6972	10.1879	4.49714	4.49302	8.85185	1.59363	1.33739	5.75898	0.442283	0.023526	0.0234957	8.39093	1.24546	0.307687	6.82743	0.00360037	0	0
13.0946	7.42269	12.7242	23.2507	13.0173	10.8089	10.8091	11.6788	9.23363	19.1013	25.2886	18.5071	17.0883	17.0885	12.2888	3.98317	7.99026	17.9328	7.80403	3.6797	3.66063	9.29556	2.66167	0.552807	9.34031	0.0206396	0	0	10.1688	5.20332	14.3553	26.3258	12.5894	7.38373	7.37967	9.53276	2.04788	1.65292	6.37512	0.651832	0.0797763	0.0797109	9.0364	1.69266	0.434436	7.54776	0.0148203	0	0
14.03	8.96854	14.7836	24.6695	15.425	13.6925	13.6926	12.513	11.6383	21.1298	26.771	20.81	19.7317	19.7319	13.1665	3.46261	9.49716	19.1269	9.62217	5.89796	5.87936	9.95953	2.18938	0.778062	10.2852	0.0679538	0	0	10.8952	4.46673	16.5812	28.0232	15.2582	10.7197	10.7159	10.2137	2.80878	2.0297	7.04271	0.932555	0.197723	0.197611	9.68185	2.21092	0.605769	8.32652	0.0464188	0	0
14.9653	10.0918	17.0469	26.1377	18.0076	16.7499	16.75	13.3472	20.1331	23.2798	28.3039	23.225	22.4818	22.482	14.0443	4.94475	11.1953	20.3706	11.6356	8.43479	8.41772	10.6235	2.65152	1.08052	11.3025	0.17833	0	0	11.6215	6.23042	19.031	29.789	18.1775	14.4061	14.4028	10.8946	3.32319	2.47634	7.76423	1.29875	0.404469	0.404305	10.3273	2.69645	0.834226	9.16631	0.119006	0	0
15.9006	10.3246	19.5109	27.6541	20.7432	19.9373	19.9374	14.1814	26.7658	25.5467	29.8861	25.7398	25.3183	25.3185	14.9221	5.76365	13.0899	21.6635	13.8297	11.2156	11.2007	11.2875	3.16436	1.48067	12.3949	0.395882	0	0	12.3478	7.50335	21.7062	31.6224	21.3259	18.3603	18.3575	11.5755	4.32487	3.00195	8.54212	1.76504	0.72675	0.726531	10.9728	3.00985	1.13472	10.0696	0.262099	0	0
16.836	15.135	22.1677	29.2169	23.6076	23.2152	23.2153	15.0156	29.8721	27.9241	31.5161	28.3412	28.2217	28.2217	15.7998	6.59307	15.1822	23.0048	16.1866	14.1779	14.1653	11.9514	3.51499	2.00234	13.5648	0.773563	0	0	13.0742	15.3399	24.6045	33.5225	24.6787	22.5118	22.5095	12.2564	2.88719	3.616	9.37867	2.34584	1.18919	1.18892	11.6182	3.95698	1.52458	11.0386	0.512757	0	0
17.7713	27.4194	25.0053	30.8243	26.5758	26.5481	26.5481	15.8498	31.2508	30.4044	33.1923	31.0154	31.1729	31.1729	16.6776	11.8189	17.4696	24.3934	18.686	17.2685	17.2585	12.6154	2.24234	2.67243	14.8148	1.36786	0	0	13.8005	25.3172	27.7196	35.4879	28.2081	26.8003	26.7986	12.9373	2.67866	4.32813	10.276	3.05479	1.81306	1.81274	12.2637	5.45752	2.02351	12.0754	0.912722	0	0
18.7066	35.1564	28.0069	32.474	29.6219	29.9041	29.9041	16.684	33.0318	32.9782	34.9127	33.7481	34.1539	34.1539	17.5554	18.9024	19.9453	25.828	21.3057	20.4421	20.4346	13.2794	2.58755	3.52056	16.1466	2.23297	0	0	14.5269	31.8475	31.0415	37.5167	31.8852	31.174	31.1728	13.6182	3.27767	5.14798	11.2361	3.90429	2.61549	2.61513	12.9091	6.31462	2.65334	13.1818	1.50474	0.00265767	0.00267242
19.642	40.123	31.1514	34.1634	32.7203	33.2551	33.2551	17.5182	38.9357	35.6349	36.675	36.5247	37.1477	37.1476	18.4331	22.7926	22.5974	27.3071	24.0224	23.6599	23.6548	13.9433	3.42017	4.57824	17.562	3.41562	0	0	15.2532	36.5304	34.5559	39.607	35.6798	35.5883	35.5876	14.2991	4.82261	6.08496	12.2607	4.90491	3.60898	3.60859	13.5546	6.66494	3.43759	14.3593	2.32869	0.240026	0.240178
20.5773	43.6847	34.4139	35.8899	35.8459	36.5764	36.5764	18.3524	43.4064	38.3623	38.4768	39.3305	40.138	40.138	19.3109	25.4899	25.4098	28.8286	26.8123	26.8886	26.8857	14.6073	5.04712	5.87792	19.0623	4.95116	0.350993	0.34868	15.9796	41.2311	38.2442	41.7562	39.5615	40.0043	40.0041	14.98	5.44899	7.14795	13.3513	6.0651	4.8013	4.8009	14.2	7.15551	4.40082	15.6091	3.41831	0.973324	0.973594
21.5126	45.8424	37.7658	37.6501	38.9746	39.8461	39.8461	19.1866	45.3979	41.1472	40.3151	42.1511	43.11	43.1099	20.1887	31.9307	28.3616	30.3904	29.6518	30.0998	30.0989	15.2713	6.38522	7.45146	20.6482	6.86116	1.87738	1.8735	16.7059	46.1041	42.0843	43.9614	43.5004	44.3892	44.3893	15.661	5.60827	8.34508	14.5091	7.39075	6.19552	6.19511	14.8455	7.7591	5.56776	16.932	4.79863	2.23885	2.2392
22.448	45.0775	41.1761	39.4406	42.0836	43.0453	43.0452	20.0209	45.5281	43.9752	42.1869	44.9722	46.0496	46.0495	21.0664	39.3758	31.4283	31.9901	32.5177	33.2693	33.2701	15.9353	6.63702	9.32853	22.32	9.15257	4.34575	4.34134	17.4322	50.4719	46.0503	46.2194	47.4674	48.7142	48.7147	16.3419	4.89647	9.68334	15.7349	8.88494	7.79017	7.78976	15.491	7.73482	6.96217	18.3284	6.48436	4.01431	4.0147
23.3833	38.569	44.6113	41.2577	45.1516	46.1576	46.1576	20.855	55.023	46.8312	44.0889	47.7799	48.9442	48.944	21.9442	41.6864	34.5814	33.6247	35.388	36.3764	36.3787	16.5992	6.8976	11.5347	24.0777	11.8181	7.5428	7.53844	18.1586	52.1138	50.1133	48.5265	51.4349	52.9552	52.956	17.0228	5.87439	11.1684	17.0292	10.5479	9.57972	9.57933	16.1364	7.02004	8.60563	19.7982	8.47936	6.25255	6.25295
24.3186	45.5637	48.0372	43.0973	48.1591	49.1693	49.1692	21.6893	62.08	49.6994	46.0174	50.5611	51.782	51.7818	22.822	41.3863	37.7897	35.2912	38.2417	39.4038	39.4074	17.2632	7.2922	14.0894	25.9204	14.8377	11.2969	11.2929	18.8849	55.948	54.242	50.8786	55.3766	57.0913	57.0924	17.7037	7.03396	12.8041	18.3922	12.3767	11.5549	11.5545	16.7819	6.70426	10.5161	21.3409	10.7769	8.89481	8.89519
25.254	53.3524	51.4194	44.9552	51.0886	52.0684	52.0683	22.5235	68.1484	52.5634	47.9684	53.3031	54.5524	54.5522	23.6997	42.2494	41.0201	36.9862	41.0592	42.3369	42.3416	17.9272	8.43144	17.0041	27.8467	18.1803	15.4648	15.4614	19.6113	63.6617	58.4029	53.2714	59.2683	61.1052	61.1065	18.3846	8.99684	14.5925	19.8236	14.3657	13.7032	13.7028	17.4273	8.44438	12.7067	22.9554	13.3605	11.8777	11.878
26.1893	54.9313	54.7239	46.8266	53.9243	54.8452	54.8451	23.3577	67.7373	55.4071	49.9379	55.9941	57.246	57.2458	24.5775	49.9407	44.2386	38.7059	43.8228	45.1639	45.1693	18.5911	9.14694	20.2801	29.8548	21.8062	19.9259	19.9232	20.3376	72.7092	62.5618	55.6999	63.0878	64.9823	64.9838	19.0655	13.9387	16.5332	21.3225	16.5064	16.0094	16.0092	18.0728	9.88366	15.1837	24.6401	16.2051	15.1371	15.1374
27.1246	57.4458	57.9188	48.7068	56.6525	57.4918	57.4917	24.1919	66.7292	58.2138	51.9213	58.623	59.8542	59.854	25.4553	53.789	47.4108	40.4464	46.5163	47.8747	47.8808	19.2551	17.1121	23.9076	31.9419	25.6697	24.578	24.5759	21.064	78.5092	66.6838	58.1589	66.8149	68.7107	68.7122	19.7464	18.3637	18.6236	22.8877	18.7876	18.4563	18.456	18.7182	14.5474	17.9463	26.3928	19.2792	18.6108	18.611
28.0599	59.2181	60.9746	50.5906	59.2612	60.0017	60.0017	25.0261	70.0671	60.9678	53.9141	61.1795	62.3696	62.3694	26.333	54.5268	50.5035	42.2033	49.1253	50.4617	50.4682	19.9191	27.9248	27.8647	34.1047	29.7209	29.3346	29.3332	21.7903	80.94	70.7346	60.6429	70.4317	72.2805	72.2821	20.4273	21.7055	20.8582	24.5174	21.1958	21.0246	21.0244	19.3637	20.4541	20.9847	28.2108	22.546	22.2399	22.2401
28.9953	65.5804	63.865	52.4728	61.7406	62.3702	62.3702	25.8603	69.9542	63.6533	55.9114	63.6545	64.7857	64.7855	27.2108	55.9226	53.4854	43.9723	51.6373	52.9188	52.9255	20.583	35.0276	32.1166	36.339	33.9082	34.1226	34.1218	22.5166	89.3854	74.681	63.146	73.9224	75.6842	75.6858	21.1082	23.3636	23.229	26.2093	23.7156	23.694	23.6939	20.0092	25.5991	24.2802	30.0905	25.9653	25.9697	25.9699
29.9306	71.8298	66.5675	54.3479	64.0824	64.5938	64.5937	26.6945	69.4989	66.2557	57.9082	66.0394	67.0969	67.0967	28.0886	58.4276	56.328	45.7484	54.0414	55.2414	55.2482	21.247	38.1917	36.6168	38.6402	38.1798	38.8805	38.8803	23.243	93.6512	78.4921	65.6619	77.2734	78.9158	78.9174	21.7892	25.9654	25.7252	27.9604	26.3297	26.4436	26.4435	20.6546	28.4953	27.8047	32.0279	29.4953	29.7503	29.7504
30.8659	71.0071	69.0639	56.2101	66.2803	66.67	66.6699	27.5287	66.0135	68.7612	59.8991	68.3269	69.2985	69.2983	28.9664	62.0408	59.0062	47.5267	56.3286	57.4262	57.433	21.911	42.8985	41.3079	41.0027	42.4854	43.5569	43.5572	23.9693	94.6941	82.139	68.1841	80.4732	81.9709	81.9726	22.4701	30.5395	28.3334	29.7673	29.0197	29.2518	29.2517	21.3001	29.5787	31.5216	34.0185	33.0938	33.5365	33.5366
31.8013	69.5357	71.3405	58.0538	68.3292	68.5976	68.5975	28.3629	70.0783	71.1572	61.8787	70.5104	71.3865	71.3863	29.8441	60.2593	61.499	49.302	58.4913	59.4713	59.4779	22.5749	54.8667	46.1235	43.4203	46.7774	48.1094	48.1101	24.6957	88.6563	85.5965	70.7057	83.5121	84.8468	84.8484	23.151	33.2409	31.0375	31.626	31.7661	32.0971	32.0971	21.9455	33.8155	35.3859	36.0567	36.7192	37.2884	37.2884
32.7366	78.153	73.388	59.8729	70.2258	70.3762	70.3761	29.1971	75.7553	73.4323	63.8416	72.5843	73.3579	73.3578	30.7219	58.9423	63.7899	51.0688	60.5238	61.3756	61.382	23.2389	63.1186	50.991	45.8858	51.0117	52.503	52.504	25.422	89.1005	88.8426	73.2196	86.3824	87.5418	87.5433	23.8319	33.9415	33.8192	33.5318	34.5491	34.9584	34.9585	22.591	42.4087	39.3464	38.1367	40.3321	40.9706	40.9706
33.6719	83.1573	75.2017	61.6614	71.968	72.0064	72.0063	30.0313	79.1013	75.5765	65.7821	74.5438	75.2104	75.2102	31.5997	64.3638	65.8669	52.8216	62.4215	63.1391	63.1451	23.9029	66.5199	55.8345	48.3918	55.1481	56.7096	56.7109	26.1484	92.4321	91.8596	75.7187	89.0782	90.0553	90.0567	24.5128	31.4176	36.6582	35.4795	37.3484	37.8152	37.8153	23.2364	47.8686	43.3471	40.2518	43.8955	44.5527	44.5526
34.6073	79.787	76.7811	63.4133	73.555	73.4893	73.4893	30.8655	76.2189	77.5815	67.6943	76.385	76.942	76.9419	32.4774	69.7919	67.7228	54.5548	64.1812	64.7625	64.768	24.5668	67.882	60.5779	50.9297	59.1512	60.7071	60.7085	26.8747	94.9122	94.6335	78.1952	91.5952	92.3877	92.389	25.1937	38.573	39.5324	37.4633	40.1439	40.6478	40.648	23.8819	49.5799	47.3298	42.3948	47.3757	48.0084	48.0084
35.5426	80.1331	78.1295	65.1226	74.9871	74.8269	74.8269	31.6997	73.7902	79.4403	69.5726	78.1049	78.5519	78.5517	33.3552	70.2536	69.3548	56.2624	65.8011	66.2471	66.2522	25.2308	67.2737	65.1486	53.4906	62.9902	64.4781	64.4797	27.601	99.8961	97.1547	80.6415	93.9305	94.5403	94.5415	25.8746	45.3813	42.4187	39.4768	42.916	43.4376	43.4377	24.5274	46.7131	51.2354	44.5581	50.7423	51.3159	51.3158
36.4779	77.9923	79.2534	66.7831	76.2655	76.0217	76.0217	32.5339	78.0164	81.1478	71.411	79.7012	80.0394	80.0393	34.233	67.086	70.7642	57.9387	67.2804	67.595	67.5995	25.8948	69.2508	69.4799	56.0648	66.639	68.0101	68.0118	28.3274	87.3268	99.4178	83.05	96.0828	96.5151	96.5163	26.5555	50.6031	45.2929	41.5133	45.6457	46.1669	46.1671	25.1728	52.7614	55.0074	46.7332	53.9689	54.4569	54.4568
37.4133	76.532	80.1624	68.3888	77.3924	77.0765	77.0765	33.3681	79.4875	82.7001	73.2037	81.1724	81.4046	81.4045	35.1107	67.5251	71.956	59.5778	68.6194	68.8087	68.8126	26.5588	75.5624	73.514	58.6421	70.076	71.2942	71.2958	29.0537	91.113	101.421	85.4127	98.0517	98.3148	98.3158	27.2364	53.2111	48.1309	43.5652	48.315	48.8197	48.8199	25.8183	61.0688	58.5937	48.9114	57.0331	57.4169	57.4167
38.3486	71.5416	80.8681	69.9339	78.3706	77.9948	77.9948	34.2023	80.0728	84.0953	74.9449	82.5176	82.648	82.6479	35.9885	71.1848	72.9386	61.1737	69.819	69.8911	69.8944	27.2227	79.5531	77.2041	61.2119	73.2844	74.3248	74.3264	29.7801	92.7474	103.167	87.7216	99.8382	99.9425	99.9434	27.9174	53.976	50.9085	45.6248	50.907	51.3812	51.3815	26.4637	67.2445	61.9478	51.0834	59.9159	60.1844	60.1843
39.2839	67.831	81.384	71.4124	79.2038	78.7802	78.7802	35.0365	78.3767	85.3325	76.6288	83.7367	83.7706	83.7705	36.8663	71.4735	73.7225	62.7205	70.8812	70.8454	70.8482	27.8867	80.3165	80.5152	63.763	76.2513	77.0993	77.1009	30.5064	91.7303	104.659	89.9691	101.444	101.402	101.403	28.5983	58.2432	53.6024	47.6837	53.4061	53.8382	53.8384	27.1092	70.1641	65.0315	53.2397	62.6023	62.7511	62.751
40.2193	71.1822	81.7245	72.8188	79.896	79.4367	79.4367	35.8707	78.3159	86.4127	78.2499	84.8301	84.7737	84.7737	37.744	66.7009	74.3204	64.2125	71.8086	71.6754	71.6776	28.5507	80.9667	83.4251	66.2839	78.9675	79.6175	79.619	31.2328	90.5582	105.908	92.1471	102.872	102.697	102.698	29.2792	62.6649	56.1906	49.7332	55.7981	56.1789	56.1791	27.7546	69.6332	67.8151	55.3703	65.081	65.1111	65.111
41.1546	76.5966	81.9046	74.1477	80.4518	79.9687	79.9687	36.7049	81.6775	87.3377	79.8024	85.7987	85.6592	85.6591	38.6218	67.3315	74.7465	65.6439	72.6043	72.3849	72.3865	29.2146	78.7795	85.9237	68.7629	81.4276	81.8813	81.8827	31.9591	91.4151	106.922	94.2479	104.126	103.833	103.833	29.9601	64.2079	58.6526	51.7645	58.0704	58.3929	58.3931	28.4001	70.6832	70.2782	57.465	67.3435	67.261	67.2609
42.0899	79.9225	81.9395	75.3937	80.8761	80.3805	80.3804	37.5391	82.5869	88.1109	81.2811	86.6441	86.4289	86.4289	39.4996	71.991	75.0154	67.0091	73.272	72.9779	72.979	29.8786	82.7772	88.0125	71.188	83.6292	83.8944	83.8957	32.6855	90.4728	107.715	96.2639	105.21	104.813	104.813	30.641	64.1669	60.9699	53.7681	60.2118	60.4715	60.4717	29.0456	72.6593	72.4096	59.5135	69.3848	69.1993	69.1992
43.0253	79.5669	81.8441	76.552	81.1742	80.6767	80.6767	38.3733	82.0785	88.7363	82.6807	87.3681	87.0854	87.0854	40.3773	74.4641	75.1423	68.3028	73.8158	73.4587	73.4592	30.5426	84.4516	89.7032	73.5472	85.5726	85.662	85.6631	33.4118	95.4068	108.3	98.1878	106.128	105.643	105.643	31.3219	61.7674	63.1265	55.7347	62.2129	62.4073	62.4076	29.691	75.3543	74.2071	61.5054	71.2023	70.9265	70.9264
43.9606	71.801	81.6327	77.6179	81.3515	80.8621	80.8621	39.2075	83.1931	89.2192	83.9963	87.9732	87.6311	87.6311	41.2551	72.581	75.1419	69.5196	74.2401	73.8315	73.8315	31.2065	81.9125	91.0155	75.8284	87.2606	87.1903	87.1912	34.1381	101.293	108.691	100.012	106.886	106.328	106.329	32.0028	65.9995	65.1088	57.6548	64.0656	64.1946	64.1948	30.3365	77.2542	75.6764	63.4304	72.7961	72.4446	72.4445
44.8959	77.0465	81.3187	78.587	81.4138	80.9415	80.9415	40.0417	82.8391	89.5654	85.223	88.4619	88.069	88.069	42.1329	69.1651	75.0286	70.6547	74.5496	74.1009	74.1003	31.8705	83.0183	91.9755	78.0198	88.6981	88.4868	88.4876	34.8645	104.296	108.904	101.73	107.489	106.874	106.874	32.6837	69.8987	66.9062	59.5186	65.7638	65.8287	65.8289	30.9819	76.7362	76.8298	65.2779	74.1682	73.7571	73.757
45.8312	76.8714	80.9146	79.4554	81.3668	80.9196	80.9196	40.8759	85.5202	89.7813	86.3565	88.8375	88.4021	88.4021	43.0107	69.3376	74.8158	71.7035	74.7491	74.2712	74.2701	32.5345	90.7362	92.6138	80.1095	89.8915	89.5597	89.5603	35.5908	106.419	108.954	103.336	107.943	107.285	107.284	33.3647	73.6197	68.5106	61.3166	67.3026	67.3065	67.3066	31.6274	74.3435	77.6852	67.0379	75.3227	74.8684	74.8683
46.7666	77.5148	80.4316	80.2195	81.2164	80.8015	80.8015	41.7101	82.8139	89.8738	87.3925	89.1031	88.6335	88.6335	43.8884	71.6036	74.516	72.6614	74.8438	74.347	74.3455	33.1984	97.1073	92.9631	82.0861	90.8489	90.4178	90.4183	36.3172	108.139	108.856	104.822	108.255	107.566	107.566	34.0456	70.8636	69.9169	63.0393	68.6787	68.6258	68.626	32.2728	76.9186	78.2644	68.7006	76.2652	75.7842	75.7842
47.7019	78.0967	79.88	80.8762	80.9683	80.5919	80.5919	42.5443	85.2776	89.85	88.3271	89.2623	88.7666	88.7667	44.7662	67.863	74.1405	73.5245	74.8388	74.3328	74.3308	33.8624	98.0948	93.0569	83.9387	91.5795	91.0705	91.0708	37.0435	107.578	108.625	106.183	108.429	107.725	107.724	34.7265	67.7392	71.1227	64.6775	69.8901	69.786	69.7861	32.9183	76.9926	78.592	70.2565	77.0024	76.511	76.5109
48.6372	84.6754	79.2687	81.4226	80.6284	80.2957	80.2957	43.3785	86.008	89.7174	89.157	89.3188	88.8049	88.805	45.644	64.6983	73.6994	74.2891	74.7393	74.233	74.2307	34.5264	92.0142	92.928	85.6567	92.0935	91.5273	91.5275	37.7699	110.829	108.274	107.414	108.474	107.765	107.764	35.4074	67.9642	72.1282	66.222	70.9362	70.7872	70.7873	33.5637	73.8707	78.6936	71.6964	77.5425	77.0557	77.0557
49.5726	84.3298	78.6054	81.8564	80.2024	79.9176	79.9176	44.2127	87.5691	89.4833	89.8789	89.2766	88.7519	88.752	46.5217	65.0095	73.2016	74.952	74.5506	74.0522	74.0495	35.1904	84.5124	92.6072	87.2303	92.4015	91.7983	91.7983	38.4962	110.391	107.817	108.509	108.394	107.692	107.691	36.0883	70.2469	72.9359	67.6644	71.8177	71.6306	71.6307	34.2092	69.3182	78.5951	73.012	77.8941	77.4261	77.4261
50.5079	79.9974	77.8971	82.1759	79.6961	79.4624	79.4625	45.0469	85.0234	89.1551	90.4902	89.1397	88.6113	88.6113	47.3995	67.9378	72.6548	75.5103	74.2779	73.7946	73.7916	35.8543	77.2607	92.1231	88.6502	92.5149	91.8934	91.8932	39.2225	105.789	107.266	109.465	108.198	107.512	107.511	36.7692	71.054	73.5506	68.9963	72.5362	72.3182	72.3183	34.8547	67.7981	78.3216	74.1954	78.0669	77.6302	77.6302
51.4432	74.4636	77.1496	82.3797	79.1151	78.9349	78.9349	45.8811	84.7707	88.7401	90.9884	88.9122	88.3866	88.3867	48.2773	66.8691	72.0656	75.9616	73.9263	73.4647	73.4614	36.5183	81.2084	91.5007	89.9081	92.4454	91.8227	91.8224	39.9489	102.311	106.631	110.277	107.89	107.23	107.229	37.4501	64.7789	73.9787	70.2101	73.0944	72.8531	72.8531	35.5001	73.3113	77.8967	75.2393	78.0707	77.6764	77.6764
52.3786	72.2266	76.3678	82.4669	78.4647	78.3394	78.3394	46.7153	81.9177	88.2453	91.3717	88.5984	88.0816	88.0817	49.155	64.1124	71.4398	76.3039	73.5009	73.0666	73.0631	37.1823	80.2851	90.7623	90.9965	92.2045	91.5963	91.5959	40.6752	100.184	105.922	110.943	107.478	106.851	106.85	38.131	61.839	74.2285	71.2987	73.496	73.2387	73.2387	36.1456	78.0024	77.3418	76.1374	77.9158	77.5733	77.5733
53.3139	65.8912	75.5559	82.4371	77.7503	77.6805	77.6805	47.5495	82.1819	87.6775	91.6386	88.2024	87.7001	87.7002	50.0328	67.372	70.7821	76.5357	73.0068	72.6046	72.6009	37.8462	79.0005	89.9266	91.9088	91.8043	91.2241	91.2236	41.4016	100.606	105.148	111.459	106.967	106.381	106.38	38.8119	65.336	74.3091	72.2556	73.7453	73.4794	73.4794	36.791	78.1826	76.6765	76.8842	77.6128	77.3295	77.3296
54.2492	62.2567	74.7176	82.2905	76.9769	76.9626	76.9626	48.3837	80.9922	87.0432	91.7881	87.7287	87.2457	87.2458	50.9106	68.9786	70.0964	76.656	72.4488	72.0827	72.0788	38.5102	76.9407	89.0094	92.6394	91.2563	90.716	90.7154	42.1279	100.055	104.318	111.823	106.364	105.824	105.823	39.4929	69.2664	74.2308	73.0751	73.8476	73.5798	73.5798	37.4365	76.5415	75.9174	77.475	77.172	76.9539	76.9539
55.1846	67.9868	73.8558	82.0277	76.1496	76.1898	76.1899	49.2179	81.0647	86.3484	91.8196	87.1813	86.7222	86.7223	51.7883	69.5243	69.3861	76.6642	71.8317	71.5048	71.5008	39.1742	83.1894	88.0237	93.1841	90.5721	90.0816	90.0809	42.8543	98.1718	103.437	112.034	105.675	105.186	105.185	40.1738	69.8783	74.0046	73.7523	73.8085	73.5454	73.5453	38.0819	73.1522	75.0793	77.9061	76.6039	76.4551	76.4552
56.1199	71.1046	72.973	81.6498	75.2731	75.3664	75.3664	50.0521	79.9499	85.5988	91.733	86.5647	86.1332	86.1333	52.6661	66.3262	68.6541	76.5605	71.1601	70.8748	70.8707	39.8381	88.2207	86.9802	93.5392	89.7631	89.3303	89.3295	43.5806	95.9133	102.512	112.09	104.906	104.472	104.471	40.8547	69.3658	73.6418	74.283	73.6342	73.3817	73.3816	38.7274	69.4621	74.1744	78.1749	75.9189	75.8419	75.8419
57.0552	73.8097	72.0715	81.1585	74.352	74.4962	74.4963	50.8863	78.2161	84.7999	91.5287	85.883	85.4825	85.4826	53.5439	67.081	67.9025	76.3451	70.4384	70.1964	70.1922	40.5021	86.8925	85.8874	93.7029	88.8401	88.4712	88.4703	44.3069	99.5735	101.548	111.993	104.063	103.686	103.685	41.5356	68.6751	73.1535	74.6641	73.3314	73.0947	73.0946	39.3729	69.4308	73.2132	78.2796	75.127	75.1227	75.1228
57.9906	70.0835	71.1531	80.5556	73.3907	73.5832	73.5833	51.7205	79.9331	83.9565	91.2073	85.1404	84.7736	84.7737	54.4216	68.3276	67.1334	76.0191	69.6709	69.4732	69.4691	41.1661	88.8255	84.7523	93.6739	87.8138	87.5131	87.5122	45.0333	103.098	100.549	111.742	103.15	102.833	102.832	42.2165	69.479	72.5513	74.8931	72.9069	72.6907	72.6906	40.0183	69.5557	72.204	78.2196	74.2381	74.306	74.3061
58.9259	69.1014	70.2195	79.8439	72.3934	72.6311	72.6311	52.5547	81.079	83.0731	90.7701	84.3409	84.01	84.0102	55.2994	66.7729	66.3484	75.5838	68.8618	68.7088	68.7046	41.83	88.6385	83.5804	93.4524	86.6943	86.4647	86.4637	45.7596	100.725	99.5194	111.337	102.174	101.917	101.916	42.8974	69.4552	71.846	74.9688	72.3679	72.1761	72.176	40.6638	65.1486	71.1541	77.9952	73.2616	73.3999	73.4
59.8612	69.7704	69.272	79.0263	71.364	71.6434	71.6434	53.3889	81.3916	82.154	90.2189	83.4887	83.1954	83.1955	56.1772	65.3688	65.5488	75.0412	68.0149	67.9064	67.9023	42.494	88.0687	82.3763	93.0399	85.4915	85.3341	85.3331	46.486	99.6211	98.4623	110.782	101.14	100.944	100.943	43.5783	68.4913	71.0482	74.8905	71.7218	71.5575	71.5573	41.3092	65.4109	70.0692	77.6078	72.2067	72.4124	72.4124
60.7965	66.9053	68.3119	78.1062	70.3064	70.6236	70.6236	54.2231	80.0641	81.203	89.5557	82.5875	82.3331	82.3332	57.0549	66.4196	64.736	74.3936	67.1341	67.0693	67.0653	43.158	83.8544	81.1436	92.4389	84.2145	84.1292	84.1282	47.2123	95.0825	97.3806	110.077	100.052	99.9161	99.9151	44.2592	65.608	70.168	74.6588	70.9759	70.8415	70.8414	41.9547	68.7783	68.9541	77.06	71.082	71.351	71.3511
61.7319	72.3452	67.3405	77.0873	69.2241	69.5749	69.575	55.0573	81.7051	80.2234	88.7831	81.6414	81.4264	81.4265	57.9327	66.8946	63.9111	73.6438	66.223	66.2007	66.1968	43.822	83.0686	79.8854	91.6531	82.8722	82.8576	82.8566	47.9387	95.9199	96.2765	109.227	98.9153	98.8386	98.8377	44.9401	65.9117	69.2147	74.2752	70.1377	70.035	70.0348	42.6001	68.561	67.8129	76.3551	69.8959	70.2233	70.2234
62.6672	73.2857	66.3587	75.9738	68.1206	68.5007	68.5007	55.8915	83.1352	79.2186	87.9039	80.6539	80.4786	80.4787	58.8105	66.9702	63.0749	72.795	65.285	65.3035	65.2997	44.4859	76.0582	78.6044	90.6872	81.4729	81.5265	81.5255	48.665	94.6961	95.1524	108.234	97.7348	97.7153	97.7144	45.6211	68.6407	68.1973	73.7419	69.2146	69.1445	69.1444	43.2456	69.434	66.6488	75.4975	68.6562	69.0364	69.0365
63.6025	73.7891	65.3676	74.7703	66.9991	67.4038	67.4038	56.7257	79.6793	78.1912	86.9215	79.6286	79.493	79.4931	59.6882	66.7656	62.2284	71.8509	64.3234	64.3805	64.3769	45.1499	77.1647	77.303	89.5471	80.0245	80.1427	80.1417	49.3914	94.9882	94.01	107.102	96.5147	96.55	96.5491	46.302	68.8105	67.1237	73.0622	68.2139	68.1768	68.1766	43.8911	69.0046	65.4647	74.4925	67.3704	67.797	67.797
64.5379	73.4521	64.3681	73.4815	65.8626	66.2871	66.2872	57.5599	80.7892	77.1439	85.8395	78.5692	78.4726	78.4727	60.566	68.2933	61.3725	70.8153	63.3412	63.4346	63.4312	45.8139	80.0233	75.9833	88.2396	78.5342	78.7127	78.7118	50.1177	93.2829	92.851	105.836	95.2591	95.3463	95.3454	46.9829	69.0711	66.0015	72.2403	67.1428	67.1383	67.1382	44.5365	68.434	64.2632	73.3463	66.0455	66.5116	66.5116
65.4732	73.2894	63.3613	72.1125	64.7139	65.1535	65.1536	58.3941	83.4517	76.0791	84.662	77.4788	77.4203	77.4204	61.4438	67.7236	60.5079	69.6927	62.3413	62.4683	62.4651	46.4778	75.7096	74.6471	86.7725	77.0091	77.2428	77.2419	50.844	98.201	91.6768	104.441	93.972	94.1077	94.1068	47.6638	69.4291	64.8372	71.2811	66.0083	66.0357	66.0355	45.182	68.0799	63.0465	72.0659	64.688	65.1863	65.1864
66.4085	71.5547	62.3478	70.6687	63.5557	64.0055	64.0056	59.2283	82.8329	74.9989	83.3932	76.3609	76.3392	76.3393	62.3215	66.531	59.6355	68.4876	61.3265	61.4841	61.4811	47.1418	72.8742	73.2964	85.1545	75.4554	75.7387	75.7378	51.5704	99.5541	90.4889	102.923	92.6572	92.8376	92.8368	48.3447	71.2399	63.6371	70.1903	64.8174	64.875	64.8749	45.8274	67.4244	61.8167	70.6588	63.304	63.8272	63.8273
67.3439	64.7622	61.3286	69.1556	62.3905	62.8457	62.8457	60.0625	79.6486	73.9051	82.0379	75.2184	75.232	75.2321	63.1993	67.9255	58.7558	67.205	60.2994	60.4845	60.4817	47.8058	74.0125	71.9329	83.3949	73.8793	74.2059	74.205	52.2967	97.0985	89.2883	101.288	91.3182	91.5394	91.5386	49.0256	70.8623	62.4066	68.9744	63.5766	63.6627	63.6625	46.4729	64.9659	60.5757	69.1335	61.8992	62.4396	62.4397
68.2792	65.6526	60.3046	67.5789	61.2207	61.6763	61.6763	60.8968	82.067	72.7996	80.6007	74.0544	74.1015	74.1016	64.0771	68.0246	57.8697	65.85	59.2624	59.4715	59.469	48.4697	73.9109	70.5583	81.5038	72.2861	72.6495	72.6488	53.0231	95.8827	88.0762	99.5407	89.9584	90.216	90.2153	49.7065	69.249	61.1506	67.6405	62.2924	62.4044	62.4043	47.1183	60.1836	59.3253	67.4989	60.4789	61.0289	61.0289
69.2145	62.7842	59.2766	65.9446	60.0484	60.4996	60.4996	61.7309	81.6605	71.6839	79.0869	72.8717	72.9502	72.9503	64.9549	63.5569	56.9779	64.4281	58.2178	58.4475	58.4452	49.1337	75.7385	69.1743	79.492	70.681	71.0746	71.0738	53.7494	95.0583	86.8538	97.6893	88.5811	88.8704	88.8698	50.3874	68.6474	59.8738	66.1964	60.9707	61.1062	61.106	47.7638	58.77	58.0673	65.7643	59.048	59.5998	59.5998
70.1499	62.2378	58.2453	64.2585	58.8757	59.3177	59.3177	62.5652	80.0667	70.5595	77.5017	71.673	71.7806	71.7807	65.8326	65.7669	56.0811	62.9447	57.1677	57.4144	57.4124	49.7977	81.1182	67.7825	77.3705	69.0688	69.4855	69.4848	54.4758	97.7489	85.622	95.7404	87.1892	87.5055	87.505	51.0683	64.8341	58.5799	64.6501	59.6176	59.7734	59.7733	48.4093	59.1254	56.8032	63.9395	57.6109	58.157	58.1571
71.0852	63.4968	57.2115	62.5268	57.7043	58.1325	58.1326	63.3994	80.8788	69.4277	75.8507	70.4609	70.5953	70.5953	66.7104	67.6906	55.1799	61.4056	56.1141	56.3742	56.3724	50.4616	87.3222	66.3844	75.1508	67.4537	67.8865	67.8859	55.2021	97.5205	84.3818	93.7012	85.7855	86.1241	86.1235	51.7493	61.5072	57.2727	63.0104	58.2385	58.4114	58.4113	49.0547	58.9024	55.5347	62.0346	56.1717	56.7048	56.7049
72.0205	63.6245	56.1761	60.7555	56.5362	56.9461	56.9461	64.2336	81.862	68.2899	74.1393	69.2379	69.3963	69.3964	67.5882	66.2006	54.275	59.8166	55.0589	55.3286	55.3272	51.1256	86.4985	64.9817	72.8448	65.8397	66.2815	66.281	55.9284	95.6891	83.1341	91.5793	84.3729	84.7285	84.7281	52.4302	57.6647	55.9554	61.2863	56.8388	57.0252	57.0251	49.7002	57.8025	54.2633	60.0598	54.7343	55.2472	55.2473
72.9559	63.6812	55.1398	58.9506	55.3728	55.7601	55.7601	65.0678	79.4803	67.1472	72.3733	68.0064	68.1861	68.1862	68.4659	62.8959	53.3671	58.1835	54.0037	54.2794	54.2783	51.7896	79.7626	63.5759	70.4645	64.2303	64.6743	64.6739	56.6548	98.6735	81.8799	89.3822	82.9536	83.3214	83.321	53.1111	53.5454	54.6308	59.4871	55.4233	55.6198	55.6197	50.3456	55.1035	52.9906	58.0256	53.3019	53.788	53.788
73.8912	64.3592	54.1034	57.1183	54.2156	54.5761	54.5761	65.902	77.7345	66.0007	70.5586	66.7685	66.9667	66.9668	69.3437	63.8267	52.4569	56.5123	52.9502	53.2282	53.2274	52.4535	74.9383	62.1685	68.022	62.6289	63.0682	63.0679	57.3811	98.6834	80.62	87.1178	81.5302	81.9049	81.9046	53.792	50.7351	53.3018	57.6222	53.9967	54.1995	54.1994	50.9911	53.6583	51.7182	55.9424	51.8778	52.3304	52.3305
74.8265	63.744	53.0675	55.2645	53.066	53.3957	53.3957	66.7362	77.3306	64.8514	68.7008	65.5262	65.7401	65.7401	70.2215	62.6221	51.5449	54.8089	51.8999	52.1766	52.1761	53.1175	71.4024	60.7609	65.5291	61.0384	61.4664	61.4661	58.1075	101.179	79.3554	84.7939	80.1048	80.4814	80.4812	54.4729	49.087	51.9707	55.7013	52.5634	52.7689	52.7688	51.6365	53.2548	50.4473	53.8205	50.4646	50.8778	50.8778
75.7618	64.8776	52.033	53.395	51.9252	52.2204	52.2204	67.5704	77.3555	63.7002	66.806	64.2817	64.5083	64.5083	71.0992	62.2537	50.6319	53.0792	50.854	51.1259	51.1257	53.7815	64.7493	59.3546	62.9979	59.4614	59.8718	59.8716	58.8338	102.695	78.0868	82.4184	78.6794	79.0529	79.0527	55.1538	52.6448	50.6397	53.734	51.1274	51.3318	51.3318	52.282	54.6001	49.1794	51.6702	49.065	49.433	49.433
76.6972	62.5961	51.0004	51.5156	50.7944	51.0514	51.0514	68.4046	75.4386	62.5482	64.8799	63.0367	63.2729	63.2729	71.977	62.3714	49.7184	51.3289	49.814	50.0775	50.0776	54.4455	61.3443	57.9511	60.44	57.9004	58.287	58.2868	59.5602	101.501	76.8151	79.9991	77.2559	77.6214	77.6212	55.8347	55.6915	49.3109	51.7298	49.6925	49.8922	49.8922	52.9274	55.758	47.9159	49.5014	47.6811	47.9987	47.9987
77.6325	58.8665	49.9706	49.6319	49.6745	49.8901	49.8901	69.2388	73.7049	61.3962	62.9283	61.793	62.0359	62.0359	72.8548	61.6159	48.805	49.5638	48.7808	49.0326	49.0331	55.1094	62.17	56.5516	57.8668	56.3575	56.7144	56.7143	60.2865	93.9496	75.5411	77.544	75.8361	76.1887	76.1886	56.5156	56.5738	47.9862	49.6981	48.2622	48.4536	48.4536	53.5729	56.9911	46.6581	47.324	46.315	46.5774	46.5774
78.5678	57.9075	48.9441	47.7492	48.5666	48.7376	48.7376	70.073	72.8406	60.245	60.9568	60.5522	60.7988	60.7988	73.7325	58.8841	47.8924	47.7894	47.7557	47.9925	47.9932	55.7734	62.647	55.1574	55.2893	54.8345	55.1563	55.1563	61.0128	87.8677	74.2657	75.0609	74.4217	74.7565	74.7566	57.1965	54.3925	46.6674	47.6484	46.8397	47.0194	47.0194	54.2184	57.0221	45.4072	45.1471	44.9684	45.1712	45.1712
79.5032	54.6307	47.9216	45.8729	47.4714	47.5949	47.5949	70.9072	69.9825	59.0955	58.9713	59.3158	59.5631	59.5631	74.6103	55.2507	46.9812	46.0113	46.7395	46.9581	46.9592	56.4374	63.5873	53.7699	52.718	53.3332	53.6147	53.6148	61.7392	81.3713	72.9897	72.5572	73.0142	73.3267	73.3268	57.8775	52.8167	45.3562	45.5894	45.428	45.5925	45.5925	54.8638	53.8389	44.1646	42.9799	43.6428	43.7821	43.7821
80.4385	51.4237	46.9038	44.0078	46.3897	46.463	46.463	71.7414	67.8536	57.9483	56.977	58.0853	58.3304	58.3304	75.4881	50.3881	46.0719	44.2345	45.7331	45.9306	45.9319	57.1013	64.4927	52.3904	50.1631	51.8549	52.0915	52.0916	62.4655	71.7294	71.7137	70.0405	71.6149	71.9006	71.9007	58.5584	49.8453	44.0539	43.5299	44.0296	44.1759	44.1759	55.5093	51.9419	42.9313	40.8305	42.3396	42.412	42.412
81.3738	53.0157	45.8913	42.1587	45.3222	45.3429	45.3429	72.5756	65.7612	56.8044	54.9793	56.8619	57.102	57.1019	76.3658	47.3729	45.1651	42.4642	44.7373	44.9107	44.9124	57.7653	60.9876	51.02	47.6339	50.401	50.5882	50.5884	63.1919	66.4482	70.4387	67.5181	70.2251	70.4797	70.48	59.2393	45.4673	42.7623	41.4782	42.647	42.7721	42.7721	56.1547	48.5863	41.7086	38.7071	41.0599	41.0625	41.0625
82.3092	52.4392	44.8846	40.33	44.2695	44.2354	44.2354	73.4098	64.0173	55.6644	52.9835	55.6468	55.8791	55.8791	77.2436	46.7273	44.2613	40.7052	43.7528	43.8995	43.9015	58.4293	54.4087	49.6598	45.1392	48.9726	49.1063	49.1066	63.9182	67.0497	69.1653	64.9969	68.8461	69.0655	69.0658	59.9202	41.7459	41.4824	39.442	41.2824	41.3835	41.3835	56.8002	47.0472	40.4974	36.6169	39.8047	39.735	39.7349
83.2445	49.5878	43.8844	38.5259	43.2321	43.1411	43.1411	74.244	63.5368	54.5289	50.9945	54.4413	54.6631	54.663	78.1214	45.1552	43.3612	38.962	42.7803	42.8977	42.9	59.0932	50.7334	48.311	42.6873	47.5705	47.6472	47.6476	64.6446	70.1549	67.8943	62.4837	67.479	67.6591	67.6595	60.6011	40.9935	40.2157	37.4289	39.9377	40.0123	40.0124	57.4456	43.106	39.2989	34.5668	38.5748	38.4307	38.4306
84.1798	44.6329	42.8913	36.7503	42.2103	42.0609	42.0609	75.0782	61.748	53.3987	49.017	53.2463	53.4549	53.4549	78.9991	43.0121	42.4651	37.2389	41.8204	41.9061	41.9087	59.7572	44.7087	46.9746	40.2856	46.1955	46.212	46.2125	65.3709	73.465	66.6263	59.9851	66.1246	66.2619	66.2623	61.282	40.1932	38.9634	35.4457	38.6147	38.6605	38.6606	58.0911	39.6031	38.1139	32.5627	37.3709	37.1507	37.1506
85.1152	41.0272	41.9056	35.0069	41.2048	40.9953	40.9952	75.9124	56.282	52.2745	47.0556	52.0629	52.2558	52.2557	79.8769	39.9126	41.5736	35.5401	40.8734	40.9252	40.9281	60.4212	42.7445	45.6517	37.941	44.8483	44.8018	44.8023	66.0972	72.865	65.3622	57.5071	64.7839	64.8748	64.8753	61.9629	39.4382	37.7265	33.4987	37.3148	37.3299	37.3299	58.7366	37.2159	36.9435	30.6104	36.1935	35.896	35.896
86.0505	35.3675	40.9281	33.2989	40.2157	39.9448	39.9448	76.7466	48.8946	51.1568	45.1145	50.8918	51.0666	51.0665	80.7547	38.4997	40.6873	33.8691	39.94	39.9558	39.959	61.0851	40.2551	44.3432	35.6593	43.5294	43.4173	43.4179	66.8236	72.3307	64.1026	55.0556	63.4578	63.4989	63.4995	62.6438	38.2336	36.5061	31.5937	36.0395	36.0219	36.022	59.382	32.9003	35.7886	28.7146	35.043	34.6674	34.6674
86.9858	32.078	39.9591	31.6294	39.2433	38.9101	38.91	77.5808	44.6647	50.0462	43.198	49.7338	49.8883	49.8883	81.6325	34.6682	39.8065	32.2296	39.0205	38.9984	39.0019	61.7491	38.5628	43.0501	33.446	42.2391	42.0594	42.06	67.5499	70.5573	62.8482	52.6361	62.1469	62.1351	62.1358	63.3247	38.5756	35.3032	29.7358	34.7899	34.738	34.7381	60.0275	30.2482	34.6498	26.8795	33.9197	33.4656	33.4655
87.9212	27.5816	38.9992	30.0009	38.288	37.8914	37.8914	78.415	37.9771	48.9434	41.3096	48.5898	48.7218	48.7217	82.5102	30.197	38.9318	30.6246	38.1152	38.0535	38.0572	62.4131	37.0406	41.7731	31.3056	40.9777	40.7286	40.7293	68.2763	61.4588	61.5996	50.2536	60.8519	60.7844	60.7851	64.0057	36.6007	34.1186	27.9298	33.5669	33.4794	33.4795	60.6729	25.8864	33.528	25.1088	32.8238	32.2911	32.291
88.8565	24.6782	38.0488	28.4159	37.3498	36.8892	36.8892	79.2492	30.7304	47.8489	39.453	47.4603	47.5678	47.5676	83.388	24.1879	38.0636	29.057	37.2244	37.1215	37.1255	63.077	29.4887	40.5131	29.242	39.7453	39.4257	39.4264	69.0026	42.5546	60.3575	47.913	59.5734	59.4475	59.4483	64.6866	33.3096	32.9533	26.1797	32.3714	32.2472	32.2473	61.3184	24.5811	32.424	23.4054	31.7555	31.1443	31.1443
89.7918	20.4327	37.1084	26.8765	36.4289	35.9039	35.9038	80.0834	25.3447	46.7633	37.6314	46.3459	46.4269	46.4268	84.2658	19.2039	37.2023	27.5294	36.3483	36.2028	36.2071	63.741	19.5787	39.271	27.2583	38.5422	38.1508	38.1516	69.729	32.1044	59.1224	45.6185	58.312	58.1252	58.1261	65.3675	27.0365	31.808	24.4889	31.204	31.0423	31.0424	61.9638	22.3819	31.3383	21.7717	30.7146	30.0256	30.0256
90.7272	16.4472	36.1783	25.3845	35.5253	34.9356	34.9356	80.9176	17.8961	45.687	35.8477	45.2473	45.3	45.2999	85.1435	13.6681	36.3483	26.0439	35.4872	35.2979	35.3024	64.405	14.1534	38.0473	25.3569	37.3682	36.9044	36.9053	70.4553	22.1335	57.895	43.374	57.068	56.8182	56.8191	66.0484	17.4154	30.6834	22.8603	30.0653	29.8654	29.8656	62.6093	17.9915	30.2717	20.2094	29.7012	28.9353	28.9352
91.6625	12.3801	35.2589	23.9413	34.6393	33.9847	33.9847	81.7518	11.5916	44.6205	34.1046	44.1647	44.1875	44.1874	86.0213	9.39263	35.502	24.6026	34.6412	34.407	34.4117	65.069	9.32174	36.8427	23.5397	36.2233	35.6867	35.6876	71.1817	13.1844	56.6759	41.1833	55.8419	55.527	55.528	66.7293	10.5271	29.5801	21.2962	28.9556	28.7172	28.7173	63.2548	11.7417	29.2245	18.7198	28.7152	27.8734	27.8733
92.5978	6.3991	34.3507	22.5481	33.7707	33.0514	33.0513	82.586	7.1868	43.5644	32.4046	43.0986	43.0901	43.0899	86.8991	5.34344	34.6639	23.2071	33.8104	33.5304	33.5354	65.7329	5.79047	35.6579	21.8079	35.1074	34.4979	34.4989	71.908	7.22227	55.4655	39.0494	54.634	54.2523	54.2533	67.4102	4.8729	28.4988	19.7984	27.8753	27.5981	27.5983	63.9002	6.33438	28.1974	17.3034	27.7563	26.84	26.8399

## Sheet: WAT-94
spike_1							spike_2							spike_3							spike_4							spike_5							spike_6							spike_7							spike_8
Z-axis_1	Thickness-profile_1	skewed gaussian_1	gaussian_1	lognorm_1	gamma_1	chi2_1	Z-axis_2	Thickness-profile_2	skewed gaussian_2	gaussian_2	lognorm_2	gamma_2	chi2_2	Z-axis_3	Thickness-profile_3	skewed gaussian_3	gaussian_3	lognorm_3	gamma_3	chi2_3	Z-axis_4	Thickness-profile_4	skewed gaussian_4	gaussian_4	lognorm_4	gamma_4	chi2_4	Z-axis_5	Thickness-profile_5	skewed gaussian_5	gaussian_5	lognorm_5	gamma_5	chi2_5	Z-axis_6	Thickness-profile_6	skewed gaussian_6	gaussian_6	lognorm_6	gamma_6	chi2_6	Z-axis_7	Thickness-profile_7	skewed gaussian_7	gaussian_7	lognorm_7	gamma_7	chi2_7	Z-axis_8
0	3.3745	1.93329	8.43732	0.78034	0	0	0	2.20236	2.00504	8.13122	0.955325	0.0263742	0.0260475	0	4.62488	9.28756	16.0874	8.03839	4.73754	4.73776	0	1.97732	1.55492	6.88958	0.493085	0	0	0	4.04266	6.82849	15.5368	6.54462	4.13246	4.13225	0	3.1456	4.2478	9.91605	2.87357	1.55402	1.55399	0	3.01117	2.68369	8.30767	1.4964	0.645173	0.645176	0
0.846958	2.39135	2.33776	8.93451	1.17534	0	0	0.869427	2.7367	2.40724	8.64184	1.35544	0.232861	0.232014	1.0962	5.97008	10.2882	16.8151	9.2211	6.31316	6.31336	0.80442	2.21158	1.88109	7.36584	0.751102	0.000385578	0.000365096	0.974354	5.2973	7.82269	16.3373	7.70827	5.51343	5.51324	0.931568	3.91081	4.87386	10.5334	3.5564	2.2653	2.26528	0.860271	3.0537	3.1395	8.82753	1.96984	1.10863	1.10863	0.854439
1.69392	2.84396	2.80626	9.45063	1.68032	0.244898	0.244511	1.73885	3.41547	2.87088	9.17382	1.8527	0.646262	0.645057	2.19239	7.56599	11.3525	17.56	10.4738	7.98688	7.98705	1.60884	2.58164	2.26047	7.86468	1.09189	0.090245	0.0899061	1.9487	6.60486	8.91225	17.1609	8.96976	7.03345	7.03327	1.86314	4.57096	5.56519	11.1751	4.33122	3.11072	3.11069	1.72055	3.64254	3.65274	9.36868	2.53092	1.7032	1.70321	1.70888
2.54087	3.60535	3.34433	9.98563	2.30073	0.835601	0.835059	2.60828	3.77171	3.4012	9.72719	2.45253	1.25321	1.25178	3.28858	8.08475	12.4791	18.3216	11.7894	9.73154	9.73168	2.41326	2.92395	2.69836	8.38629	1.52527	0.369857	0.369251	2.92305	7.4214	10.0982	18.007	10.323	8.67037	8.67022	2.79471	4.10511	6.32411	11.841	5.19806	4.08251	4.08248	2.58082	3.90926	4.22694	9.9311	3.18249	2.42404	2.42404	2.56332
3.38783	4.10356	3.95703	10.5394	3.03816	1.67491	1.6743	3.4777	3.82041	4.00307	10.3019	3.15765	2.0351	2.03356	4.38477	7.28897	13.6655	19.099	13.1603	11.5245	11.5246	3.21768	2.34122	3.19988	8.93075	2.05882	0.846034	0.845243	3.8974	7.19862	11.3803	18.8749	11.7606	10.4032	10.4031	3.72628	3.72774	7.15238	12.5308	6.15541	5.17091	5.17089	3.44109	3.79716	4.86519	10.5147	3.9255	3.26354	3.26355	3.41776
4.23479	3.61286	4.64878	11.1116	3.89065	2.70611	2.70549	4.34712	3.66458	4.68085	10.8979	3.96819	2.97177	2.97021	5.48097	9.01737	14.9088	19.8916	14.5785	13.3467	13.3468	4.0221	2.43522	3.76984	9.49808	2.69753	1.50917	1.50826	4.87175	9.09496	12.7567	19.7638	13.2741	12.2123	12.2121	4.65784	4.67466	8.05104	13.2441	7.20019	6.36475	6.36473	4.30136	3.7701	5.57007	11.1192	4.75909	4.21226	4.21226	4.27219
5.08174	4.38371	5.42313	11.7022	4.85307	3.88695	3.88636	5.21655	4.42444	5.43818	11.5149	4.88181	4.04294	4.04142	6.57716	12.2354	16.2051	20.6985	16.0358	15.182	15.1821	4.82652	3.65796	4.41256	10.0882	3.44367	2.34343	2.34248	5.8461	12.9716	14.2245	20.6727	14.8545	14.0792	14.0791	5.58941	6.17861	9.02033	13.9803	8.32794	7.65197	7.65195	5.16164	4.46344	6.3435	11.7444	5.68067	5.25953	5.25954	5.12663
5.9287	5.67932	6.28257	12.3106	5.91768	5.18366	5.1831	6.08597	5.53375	6.2778	12.1527	5.89392	5.22889	5.22745	7.67336	14.6806	17.5499	21.5189	17.5237	17.0166	17.0166	5.63094	4.26969	5.13173	10.7009	4.29682	3.33028	3.32933	6.82045	15.9382	15.7787	21.6006	16.4917	15.987	15.9869	6.52098	6.53473	10.0597	14.739	9.53294	9.02	9.01998	6.02191	5.81213	7.18667	12.3898	6.68605	6.39402	6.39402	5.98107
6.77566	6.0353	7.22828	12.9364	7.07472	6.56827	6.56776	6.9554	5.92729	7.20139	12.8108	6.99802	6.51081	6.50949	8.76955	15.1272	18.9381	22.3518	19.0339	18.8387	18.8387	6.43536	4.48859	5.93021	11.3359	5.25402	4.45016	4.44925	7.79481	17.5129	17.4133	22.5463	18.1755	17.9201	17.9201	7.45255	7.46897	11.1675	15.5192	10.8083	10.4561	10.4561	6.88219	6.59007	8.09991	13.0551	7.76963	7.60405	7.60405	6.83551
7.62262	5.64019	8.26004	13.5793	8.31289	8.01724	8.01679	7.82482	5.36833	8.20942	13.4888	8.18601	7.87102	7.86985	9.86575	19.3652	20.3636	23.1962	20.5582	20.6383	20.6383	7.23978	4.91721	6.80984	11.9929	6.30999	5.68346	5.68261	8.76916	17.747	19.1204	23.5086	19.8955	19.8645	19.8644	8.38412	10.4023	12.3413	16.3202	12.1464	11.9475	11.9475	7.74246	6.48299	9.08261	13.7396	8.92461	8.87788	8.87788	7.68995
8.46957	6.27167	9.37604	14.2384	9.61994	9.51054	9.51015	8.69425	5.82223	9.301	14.1862	9.44857	9.29306	9.29203	10.9619	26.2279	21.8201	24.0508	22.0886	22.4068	22.4068	8.0442	5.72103	7.77135	12.6712	7.45748	7.01107	7.01029	9.74351	20.3437	20.8908	24.4862	21.6412	21.807	21.807	9.31569	12.3624	13.5777	17.141	13.5386	13.482	13.482	8.60273	7.84277	10.1332	14.4427	10.1432	10.204	10.204	8.54439
9.31653	7.35066	10.5728	14.9132	10.9831	11.031	11.0307	9.56367	6.85105	10.4738	14.9023	10.7754	10.7617	10.7608	12.0581	28.7728	23.3005	24.9147	23.6175	24.137	24.137	8.84862	6.27047	8.81416	13.3704	8.68758	8.4147	8.41403	10.7179	24.7735	22.7142	25.4775	23.402	23.7363	23.7363	10.2473	13.8212	14.8722	17.9804	14.976	15.0474	15.0474	9.46301	10.4295	11.2489	15.1636	11.417	11.571	11.571	9.39883
10.1635	8.87537	11.8451	15.6029	12.3894	12.5639	12.5636	10.4331	8.8212	11.7239	15.6362	12.1558	12.2629	12.2622	13.1543	28.4521	24.7976	25.7865	25.1375	25.8227	25.8227	9.65304	7.06603	9.93629	14.0896	9.9901	9.87715	9.87658	11.6922	26.5973	24.5787	26.481	25.1678	25.6417	25.6417	11.1788	15.0116	16.2193	18.8372	16.4492	16.6323	16.6323	10.3233	12.0116	12.4261	15.9014	12.7368	12.9683	12.9683	10.2533
11.0104	11.1248	13.1861	16.3066	13.8261	14.0966	14.0964	11.3025	9.62058	13.046	16.3871	13.5785	13.784	13.7835	14.2505	30.006	26.3035	26.6649	26.6417	27.4589	27.4588	10.4575	8.51554	11.1343	14.828	11.3539	11.3824	11.3819	12.6666	26.8926	26.4719	27.495	26.9287	27.5141	27.5142	12.1104	18.5771	17.6127	19.7099	17.9485	18.2259	18.2259	11.1836	13.0937	13.66	16.6551	14.0933	14.3855	14.3855	11.1077
11.8574	14.4046	14.5872	17.0234	15.2809	15.6181	15.6179	12.1719	12.42	14.4331	17.1541	15.0323	15.3134	15.313	15.3467	35.2703	27.8103	27.5485	28.1236	29.0412	29.0411	11.2619	11.3928	12.4033	15.5847	12.7674	12.9156	12.9152	13.6409	28.5707	28.3804	28.5177	28.6754	29.3452	29.3453	13.042	21.2335	19.0452	20.5972	19.4645	19.818	19.818	12.0438	14.4891	14.9448	17.4236	15.477	15.813	15.813	11.9621
12.7044	16.581	16.0384	17.7523	16.7421	17.1191	17.119	13.0414	16.0653	15.8768	17.9361	16.5063	16.8406	16.8403	16.4429	36.8116	29.3101	28.4359	29.5773	30.5661	30.566	12.0663	13.0541	13.7368	16.3584	14.2185	14.4633	14.463	14.6153	33.2381	30.2905	29.5473	30.399	31.1279	31.128	13.9735	21.5677	20.5088	21.4973	20.9874	21.3991	21.3991	12.9041	17.3486	16.2735	18.2058	16.8784	17.2418	17.2418	12.8166
13.5513	17.4069	17.5284	18.4921	18.1987	18.5917	18.5917	13.9108	18.1684	17.3675	18.7319	17.9897	18.3562	18.3561	17.5391	36.733	30.7947	29.3257	30.9974	32.0308	32.0307	12.8707	14.3775	15.1271	17.1481	15.6951	16.013	16.0128	15.5896	37.8938	32.1881	30.5817	32.0913	32.8559	32.8559	14.9051	20.7702	21.9949	22.4085	22.5082	22.9605	22.9605	13.7644	19.1776	17.6386	19.0002	18.2882	18.6634	18.6634	13.671
14.3983	16.961	19.0447	19.2417	19.6408	20.0291	20.0291	14.7802	18.605	18.8943	19.5401	19.4724	19.852	19.852	18.6353	35.6301	32.2562	30.2162	32.3789	33.433	33.4329	13.6751	16.5834	16.5648	17.9522	17.1857	17.5538	17.5537	16.564	39.0891	34.0594	31.619	33.7446	34.5237	34.5238	15.8367	24.7288	23.4943	23.329	24.0179	24.4943	24.4943	14.6246	20.2262	19.0316	19.8056	19.6973	20.0702	20.0702	14.5255
15.2452	20.7322	20.5742	19.9997	21.0593	21.4255	21.4256	15.6496	20.9651	20.4455	20.3595	20.9447	21.3204	21.3205	19.7315	38.207	33.687	31.1059	33.7174	34.7712	34.7711	14.4796	19.7989	18.0397	18.7694	18.6787	19.0757	19.0756	17.5383	38.0263	35.8907	32.657	35.352	36.1268	36.1269	16.7682	29.3731	24.9976	24.2567	25.508	25.9933	25.9933	15.4849	21.7282	20.4433	20.6204	21.0973	21.4553	21.4553	15.3799
16.0922	24.9689	22.1033	20.7649	22.446	22.7763	22.7763	16.5191	25.7217	22.0086	21.1885	22.3978	22.755	22.7552	20.8277	40.6805	35.0797	31.9931	35.009	36.044	36.0439	15.284	21.9329	19.5405	19.5981	20.1634	20.5698	20.5698	18.5127	39.7391	37.6692	33.6935	36.9072	37.6614	37.6615	17.6998	31.3408	26.4949	25.1896	26.9705	27.451	27.4511	16.3452	24.4011	21.8641	21.4429	22.4799	22.8122	22.8122	16.2343
16.9391	27.2853	23.6181	21.5357	23.7938	24.0773	24.0774	17.3885	28.468	23.5708	22.0255	23.8235	24.1501	24.1504	21.9239	39.4585	36.4274	32.8762	36.2502	37.2507	37.2506	16.0884	22.6152	21.0551	20.4364	21.6298	22.0284	22.0285	19.487	43.1296	39.3827	34.7262	38.4046	39.1243	39.1244	18.6314	31.2681	27.9765	26.1254	28.398	28.8617	28.8617	17.2055	26.7649	23.2842	22.2716	23.8378	24.1352	24.1352	17.0888
17.7861	29.8489	25.1051	22.3107	25.0965	25.3254	25.3255	18.2579	30.3603	25.119	22.869	25.2144	25.5008	25.5011	23.0201	36.924	37.7237	33.7533	37.4382	38.3907	38.3907	16.8928	24.1714	22.571	21.2827	23.0685	23.4447	23.4449	20.4614	42.9111	41.0201	35.7528	39.8394	40.513	40.5131	19.5629	34.4479	29.4327	27.062	29.7838	30.2203	30.2203	18.0657	27.828	24.6935	23.1046	25.1639	25.4192	25.4192	17.9432
18.6331	34.1695	26.5513	23.0882	26.3488	26.5181	26.5183	19.1273	31.172	26.6404	23.717	26.5641	26.8028	26.8032	24.1163	37.49	38.9628	34.6229	38.5704	39.4641	39.4641	17.6972	26.8472	24.0755	22.1349	24.4711	24.8129	24.8131	21.4357	41.4186	42.5716	36.771	41.2073	41.8256	41.8257	20.4945	36.8657	30.8539	27.9968	31.1217	31.5225	31.5225	18.926	27.7094	26.0821	23.94	26.452	26.6599	26.6599	18.7977
19.48	36.3395	27.9446	23.8668	27.5462	27.6534	27.6535	19.9968	33.9416	28.1226	24.5679	27.8666	28.0527	28.0531	25.2125	39.7745	40.1396	35.4831	39.6448	40.471	40.471	18.5017	30.021	25.5559	22.991	25.8301	26.128	26.1283	22.4101	43.2692	44.0289	37.7783	42.5049	43.0607	43.0608	21.4261	36.8233	32.2312	28.9275	32.4063	32.7645	32.7645	19.7863	28.904	27.4401	24.7759	27.6965	27.8533	27.8533	19.6521
20.327	36.66	29.2739	24.6445	28.6853	28.7298	28.7299	20.8662	35.1446	29.5541	25.4196	29.117	29.2475	29.2479	26.3087	39.2737	41.2497	36.3321	40.6599	41.4118	41.4118	19.3061	32.2072	26.9998	23.8489	27.1388	27.3858	27.3861	23.3844	46.8866	45.3849	38.7723	43.7291	44.2174	44.2175	22.3577	36.3881	33.5561	29.8516	33.6327	33.9432	33.9432	20.6466	30.5918	28.7583	25.6102	28.8923	28.9961	28.9961	20.5065
21.1739	34.497	30.5296	25.4198	29.7631	29.7463	29.7464	21.7356	33.3483	30.924	26.2702	30.3112	30.3847	30.3852	27.4048	39.7046	42.2894	37.1681	41.6144	42.2872	42.2871	20.1105	32.8001	28.3957	24.7064	28.3914	28.583	28.5833	24.3588	48.3701	46.6342	39.7504	44.8778	45.2952	45.2953	23.2892	37.5693	34.8208	30.7664	34.7968	35.0561	35.0561	21.5068	30.7565	30.028	26.4409	30.0353	30.0854	30.0854	21.361
22.0209	33.3668	31.7036	26.1908	30.7775	30.7022	30.7024	22.605	32.126	32.223	27.1175	31.4454	31.4626	31.4631	28.501	42.7454	43.2557	37.9894	42.5075	43.098	43.0979	20.9149	32.5837	29.7326	25.561	29.5831	29.7166	29.7169	25.3331	47.114	47.7731	40.7102	45.9491	46.294	46.2941	24.2208	39.6659	36.0184	31.6693	35.8951	36.1011	36.1011	22.3671	30.1989	31.2412	27.2659	31.1218	31.119	31.119	22.2154
22.8678	30.7598	32.7894	26.9556	31.7271	31.5975	31.5976	23.4745	32.4261	33.4429	27.9596	32.5171	32.4797	32.4802	29.5972	46.2062	44.1465	38.794	43.3387	43.8452	43.8452	21.7193	33.8672	31.001	26.4105	30.7099	30.7846	30.785	26.3075	47.0185	48.7992	41.6493	46.9419	47.2141	47.2142	25.1524	37.9568	37.1426	32.5578	36.9247	37.0768	37.0768	23.2274	31.7117	32.3907	28.0829	32.1487	32.095	32.095	23.0699
23.7148	28.2901	33.7824	27.7123	32.611	32.432	32.4322	24.3439	32.4349	34.5769	28.7943	33.5238	33.435	33.4355	30.6934	44.7889	44.9604	39.5801	44.1079	44.53	44.53	22.5238	34.0058	32.1924	27.2525	31.7684	31.7855	31.7858	27.2818	48.7343	49.7116	42.5651	47.8555	48.0561	48.0562	26.0839	36.785	38.1884	33.429	37.8835	37.982	37.982	24.0877	34.295	33.4703	28.8898	33.1136	33.0119	33.0119	23.9243
24.5618	28.3505	34.6796	28.4592	33.4287	33.2062	33.2064	25.2133	32.2317	35.6199	29.6193	34.4642	34.328	34.3285	31.7896	43.899	45.6967	40.3461	44.815	45.1537	45.1537	23.3282	31.9799	33.2996	28.0843	32.7563	32.7181	32.7184	28.2562	46.7527	50.5109	43.4551	48.6896	48.8208	48.8209	27.0155	36.5708	39.1516	34.2804	38.7696	38.8163	38.8163	24.9479	35.04	34.4749	29.6842	34.0146	33.8687	33.8687	24.7787
25.4087	29.0219	35.4796	29.1941	34.1804	33.9207	33.9209	26.0827	33.6809	36.5683	30.4324	35.3371	35.1583	35.1588	32.8858	45.6641	46.3555	41.0901	45.4606	45.7176	45.7176	24.1326	31.1784	34.3173	28.9036	33.6718	33.582	33.5823	29.2305	46.4152	51.199	44.317	49.4444	49.5095	49.5095	27.9471	37.7984	40.029	35.1093	39.5821	39.5793	39.5793	25.8082	34.3424	35.4004	30.4639	34.8504	34.6647	34.6647	25.6332
26.2557	31.5546	36.1826	29.9153	34.8665	34.5762	34.5764	26.9522	35.3877	37.42	31.2314	36.142	35.926	35.9265	33.982	46.8886	46.9373	41.8103	46.0452	46.2233	46.2233	24.937	32.1238	35.2413	29.7077	34.5137	34.3768	34.3771	30.2049	47.9554	51.7786	45.1483	50.1206	50.1233	50.1234	28.8786	38.6917	40.8185	35.9129	40.3202	40.2712	40.2712	26.6685	33.7547	36.2438	31.2266	35.62	35.3996	35.3996	26.4876
27.1026	32.5853	36.7903	30.6208	35.4879	35.1738	35.1739	27.8216	38.1372	38.1745	32.014	36.8789	36.6315	36.6319	35.0782	45.7667	47.4434	42.5051	46.5697	46.6723	46.6723	25.7414	32.8662	36.069	30.4942	35.2816	35.1028	35.1031	31.1792	53.3301	52.2537	45.9467	50.719	50.664	50.664	29.8102	36.4949	41.519	36.6887	40.9838	40.8924	40.8924	27.5288	35.3162	37.0032	31.9701	36.3232	36.0733	36.0733	27.342
27.9496	32.7199	37.3055	31.3085	36.0456	35.7145	35.7146	28.691	39.5185	38.8324	32.778	37.548	37.2753	37.2757	36.1744	44.8302	47.8756	43.1727	47.0351	47.0662	47.0661	26.5459	32.0955	36.7994	31.2603	35.9753	35.7607	35.7609	32.1536	55.7702	52.6289	46.7099	51.2408	51.1331	51.1331	30.7418	37.0108	42.1302	37.4342	41.5732	41.4437	41.4438	28.389	35.759	37.6778	32.6921	36.9599	36.686	36.686	28.1965
28.7965	32.9641	37.7322	31.9767	36.5411	36.1996	36.1998	29.5604	39.3458	39.3956	33.5211	38.15	37.8582	37.8585	37.2706	45.9153	48.2361	43.8116	47.4425	47.4066	47.4066	27.3503	32.1785	37.4328	32.0037	36.5955	36.3511	36.3513	33.1279	53.9266	52.9094	47.4356	51.6876	51.5326	51.5326	31.6733	38.4788	42.6527	38.1467	42.0891	41.9262	41.9262	29.2493	34.6535	38.2676	33.3903	37.5304	37.2384	37.2384	29.0509
29.6435	35.9051	38.075	32.6234	36.9761	36.6306	36.6307	30.4299	38.4682	39.8673	34.241	38.686	38.3811	38.3814	38.3668	46.7175	48.5275	44.4201	47.7933	47.6953	47.6953	28.1547	34.3498	37.9707	32.7217	37.1431	36.8751	36.8753	34.1023	52.4144	53.101	48.1219	52.0612	51.8644	51.8644	32.6049	39.8329	43.088	38.8239	42.5324	42.3411	42.3411	30.1096	34.8752	38.7736	34.0625	38.0356	37.731	37.731	29.9054
30.4905	37.0515	38.3393	33.2468	37.3522	37.0089	37.0089	31.2993	38.8513	40.2512	34.9357	39.1572	38.8453	38.8456	39.463	44.3206	48.7528	44.9967	48.089	47.9341	47.9341	28.9591	37.6316	38.4156	33.4119	37.6193	37.3342	37.3344	35.0766	51.3402	53.2096	48.7666	52.3634	52.1306	52.1307	33.5365	39.2843	43.4384	39.4634	42.9045	42.6898	42.6898	30.9698	38.0774	39.1977	34.7067	38.4764	38.1648	38.1648	30.7598
31.3374	37.4697	38.5309	33.8449	37.6714	37.336	37.336	32.1687	37.997	40.552	35.6029	39.5652	39.2521	39.2523	40.5592	43.0502	48.9151	45.5401	48.3311	48.1246	48.1246	29.7635	37.8073	38.7712	34.0719	38.0257	37.7298	37.7299	36.051	49.9656	53.2414	49.3679	52.5964	52.3334	52.3335	34.4681	37.8888	43.7065	40.063	43.2071	42.974	42.974	31.8301	40.1008	39.5425	35.3207	38.8541	38.5408	38.5408	31.6142
32.1844	37.962	38.6556	34.4161	37.9359	37.6135	37.6136	33.0381	36.5994	40.7749	36.2406	39.9117	39.6028	39.603	41.6554	43.9975	49.0179	46.0487	48.5213	48.2686	48.2686	30.568	37.0575	39.0417	34.6993	38.3642	38.0636	38.0637	37.0253	48.4545	53.2027	49.9238	52.7626	52.4751	52.4751	35.3996	39.9898	43.8957	40.6205	43.442	43.1955	43.1955	32.6904	40.3503	39.811	35.9024	39.1703	38.8605	38.8605	32.4687
33.0313	39.4392	38.7197	34.9587	38.1477	37.8432	37.8433	33.9076	35.1843	40.9251	36.8467	40.1985	39.899	39.8992	42.7516	44.7244	49.0646	46.5213	48.6614	48.3679	48.3679	31.3724	37.0608	39.2319	35.2919	38.637	38.3374	38.3375	37.9997	48.2704	53.0994	50.4328	52.8643	52.5578	52.5578	36.3312	43.1716	44.0096	41.134	43.6113	43.3562	43.3562	33.5507	39.8795	40.0069	36.45	39.4265	39.1251	39.1251	33.3231
33.8783	41.1401	38.729	35.471	38.3091	38.0268	38.0269	34.777	36.2398	41.0085	37.4192	40.4278	40.1424	40.1425	43.8478	42.3672	49.0587	46.9568	48.753	48.4242	48.4242	32.1768	39.4057	39.3472	35.8475	38.8463	38.5532	38.5532	38.974	48.7203	52.9374	50.8933	52.9041	52.5839	52.5839	37.2628	43.5892	44.0525	41.6016	43.7172	43.4582	43.4582	34.4109	40.1951	40.1342	36.9617	39.6248	39.3361	39.3361	34.1776
34.7252	41.7158	38.6892	35.9513	38.4223	38.1659	38.166	35.6464	38.7212	41.0308	37.9564	40.6016	40.3346	40.3346	44.9439	42.1092	49.004	47.3538	48.7982	48.4393	48.4394	32.9812	40.1373	39.3931	36.3641	38.9946	38.713	38.713	39.9484	48.515	52.7224	51.3037	52.8845	52.5559	52.5558	38.1943	41.624	44.0284	42.0215	43.7621	43.5037	43.5037	35.2712	41.5739	40.197	37.4356	39.7672	39.4952	39.4952	35.032
35.5722	40.0847	38.6057	36.3983	38.4896	38.2624	38.2624	36.5158	39.0663	40.9975	38.4564	40.7222	40.4774	40.4774	46.0401	45.0151	48.9038	47.7115	48.7986	48.415	48.4151	33.7856	39.5207	39.3753	36.8397	39.0846	38.8189	38.8189	40.9227	47.0648	52.4598	51.663	52.8082	52.4759	52.4759	39.1259	42.1162	43.9419	42.3923	43.7486	43.4948	43.4948	36.1315	40.8077	40.1999	37.8701	39.8557	39.6042	39.6042	35.8864
36.4192	40.7324	38.4837	36.8105	38.5133	38.318	38.318	37.3853	37.9148	40.9141	38.9176	40.7918	40.5726	40.5726	47.1363	47.3438	48.7618	48.0288	48.7563	48.353	48.353	34.5901	37.9177	39.2993	37.2725	39.1188	38.8731	38.8731	41.8971	44.3498	52.1544	51.9699	52.6779	52.3465	52.3465	40.0575	44.3899	43.7974	42.7125	43.6792	43.4338	43.4338	36.9918	40.0597	40.1473	38.2638	39.8926	39.6647	39.6647	36.7409
37.2661	40.8651	38.3277	37.1866	38.4957	38.3344	38.3344	38.2547	37.9961	40.7858	39.3384	40.813	40.6221	40.622	48.2325	45.3489	48.5811	48.305	48.6732	48.2549	48.255	35.3945	37.1208	39.1706	37.6609	39.1001	38.8779	38.8778	42.8714	48.146	51.8108	52.2235	52.4963	52.17	52.1699	40.989	43.95	43.5993	42.9811	43.5566	43.3231	43.3231	37.852	39.7635	40.0437	38.6153	39.8802	39.6786	39.6786	37.5953
38.1131	39.2159	38.142	37.5255	38.4391	38.3134	38.3134	39.1241	39.1638	40.6175	39.7173	40.7879	40.6277	40.6276	49.3287	45.8429	48.3651	48.5393	48.5511	48.1225	48.1226	36.1989	39.5761	38.9946	38.0034	39.0312	38.8354	38.8354	43.8458	50.9568	51.4332	52.423	52.2661	51.9486	51.9486	41.9206	40.8795	43.3521	43.1969	43.3836	43.165	43.165	38.7123	40.1303	39.8933	38.9233	39.8208	39.6477	39.6477	38.4498
38.96	35.4358	37.9303	37.826	38.3455	38.2567	38.2567	39.9935	38.6711	40.4137	40.0533	40.719	40.5913	40.5912	50.4249	48.0621	48.1167	48.731	48.392	47.9575	47.9575	37.0033	38.884	38.7761	38.2987	38.9149	38.748	38.7479	44.8201	49.4981	51.0254	52.5677	51.99	51.6849	51.6848	42.8522	40.5451	43.06	43.3591	43.163	42.9619	42.9619	39.5726	38.7633	39.7005	39.1867	39.7168	39.5741	39.5741	39.3042
39.807	34.0344	37.6958	38.0872	38.2174	38.1661	38.1661	40.863	37.2829	40.1785	40.3449	40.6086	40.5149	40.5148	51.5211	48.8681	47.839	48.8797	48.1977	47.7613	47.7613	37.8077	38.2201	38.5198	38.5457	38.754	38.6179	38.6178	45.7945	48.1711	50.5908	52.6573	51.6706	51.381	51.3809	43.7837	42.9094	42.727	43.4673	42.8974	42.7162	42.7162	40.4328	37.5548	39.4693	39.4046	39.5705	39.4596	39.4596	40.1586
40.6539	34.4306	37.4414	38.3082	38.0567	38.0433	38.0433	41.7324	37.3466	39.9155	40.5913	40.4592	40.4003	40.4001	52.6173	46.518	47.5344	48.985	47.9702	47.5357	47.5357	38.6122	37.4505	38.2301	38.7433	38.5512	38.4474	38.4473	46.7688	48.5594	50.1323	52.6914	51.3108	51.0392	51.0391	44.7153	46.0608	42.357	43.5209	42.5896	42.4301	42.4301	41.2931	35.8843	39.2035	39.5763	39.3845	39.3062	39.3062	41.0131
41.5009	35.551	37.1698	38.4883	37.8657	37.8899	37.8899	42.6018	39.2356	39.6281	40.7917	40.2729	40.2493	40.2492	53.7135	45.6629	47.2056	49.0465	47.7112	47.2821	47.2822	39.4166	37.3552	37.9107	38.8908	38.3093	38.2387	38.2386	47.7432	49.7494	49.6528	52.6699	50.9129	50.6617	50.6616	45.6469	44.9996	41.9538	43.5197	42.2425	42.1062	42.1062	42.1534	37.4162	38.9065	39.7011	39.1609	39.1159	39.1159	41.8675
42.3479	33.388	36.8829	38.6269	37.6462	37.7076	37.7075	43.4712	41.815	39.3193	40.9452	40.0522	40.0639	40.0637	54.8097	47.1003	46.8549	49.0642	47.4226	47.0022	47.0022	40.221	39.5419	37.5652	38.9876	38.031	37.9941	37.994	48.7175	46.3553	49.1545	52.5929	50.4797	50.2508	50.2507	46.5784	43.5692	41.5206	43.4638	41.8586	41.7467	41.7467	43.0137	38.9264	38.5817	39.7786	38.9022	38.8905	38.8905	42.722
43.1948	32.7423	36.5826	38.7236	37.4003	37.498	37.4979	44.3407	40.4631	38.9915	41.0514	39.7992	39.8459	39.8457	55.9059	48.3049	46.4843	49.0379	47.1062	46.6973	46.6974	41.0254	40.3276	37.1967	39.0334	37.7189	37.7157	37.7156	49.6919	44.3126	48.6395	52.4607	50.0135	49.8085	49.8084	47.51	43.844	41.0607	43.3533	41.4406	41.3538	41.3538	43.8739	37.623	38.2321	39.8085	38.6107	38.632	38.632	43.5764
44.0418	33.6424	36.2704	38.7781	37.1299	37.2626	37.2626	45.2101	39.0361	38.6471	41.1099	39.5161	39.5972	39.5969	57.0021	46.8356	46.0958	48.9678	46.7637	46.369	46.369	41.8298	39.4987	36.808	39.0279	37.3756	37.4057	37.4056	50.6662	45.0448	48.1097	52.2736	49.5169	49.3369	49.3369	48.4416	44.5273	40.5769	43.1888	40.9912	40.9299	40.9299	44.7342	37.0324	37.8605	39.7907	38.2886	38.3423	38.3423	44.4308
44.8887	35.7497	35.9477	38.7901	36.8368	37.0031	37.003	46.0795	39.8085	38.288	41.1205	39.205	39.3194	39.3192	58.0983	45.957	45.6911	48.854	46.3968	46.0186	46.0186	42.6343	38.2894	36.4015	38.9712	37.0035	37.0662	37.0661	51.6406	47.404	47.5666	52.0322	48.9922	48.8381	48.8381	49.3732	41.0047	40.072	42.9707	40.5128	40.4772	40.4772	45.5945	37.8066	37.4692	39.7252	37.9381	38.0233	38.0233	45.2853
45.7357	37.0873	35.6156	38.7597	36.5228	36.7208	36.7208	46.9489	41.2585	37.9158	41.0832	38.8681	39.0144	39.0142	59.1945	45.9277	45.2719	48.6968	46.0071	45.6475	45.6475	43.4387	37.6902	35.9795	38.8636	36.605	36.6993	36.6991	52.6149	48.0538	47.0117	51.7373	48.4416	48.3141	48.314	50.3047	37.4901	39.5484	42.6999	40.008	39.9978	39.9978	46.4548	39.7432	37.0605	39.6123	37.5614	37.6768	37.6768	46.1397
46.5826	36.6846	35.2749	38.6869	36.1896	36.4173	36.4173	47.8184	40.5341	37.532	40.998	38.5072	38.6839	38.6836	60.2907	44.7589	44.8396	48.4967	45.5963	45.257	45.2571	44.2431	36.953	35.5436	38.7053	36.1825	36.3069	36.3067	53.5893	45.0772	46.4463	51.3899	47.8675	47.7667	47.7667	51.2363	36.8336	39.0082	42.3775	39.4791	39.4939	39.4939	47.315	39.8557	36.6363	39.4524	37.1606	37.3047	37.3047	46.9941
47.4296	35.8871	34.9264	38.572	35.8387	36.094	36.094	48.6878	37.4982	37.1378	40.8654	38.1244	38.3295	38.3293	61.3869	41.7647	44.3954	48.2542	45.1659	44.8485	44.8485	45.0475	35.72	35.0957	38.4971	35.7382	35.891	35.8909	54.5636	45.1682	45.8712	50.9909	47.2719	47.1978	47.1978	52.1679	37.6786	38.4535	42.0046	38.9284	38.9674	38.9674	48.1753	37.66	36.1986	39.2461	36.7377	36.9088	36.9088	47.8486
48.2766	35.253	34.5709	38.4153	35.4718	35.7523	35.7522	49.5572	36.8939	36.7344	40.6857	37.7214	37.953	37.9527	62.483	42.4317	43.9406	47.9699	44.7174	44.4231	44.4231	45.8519	32.6522	34.6371	38.2398	35.2742	35.4536	35.4534	55.538	47.5663	45.2877	50.5417	46.6569	46.6093	46.6092	53.0994	39.3646	37.8861	41.5826	38.3582	38.4204	38.4204	49.0356	35.9032	35.7487	38.994	36.2945	36.4908	36.4908	48.703
49.1235	35.9148	34.2089	38.2174	35.0902	35.3934	35.3933	50.4266	38.4146	36.3225	40.4595	37.3001	37.5558	37.5555	63.5792	43.5112	43.4762	47.6446	44.2523	43.982	43.9821	46.6564	30.9767	34.169	37.9343	34.7925	34.9963	34.9961	56.5123	46.4314	44.6964	50.0436	46.0245	46.0027	46.0027	54.031	38.2368	37.3076	41.1131	37.7705	37.8548	37.8548	49.8959	37.4156	35.2882	38.6972	35.8331	36.0524	36.0524	49.5575
49.9705	34.2452	33.8408	37.9789	34.6955	35.0186	35.0185	51.2961	39.5293	35.9031	40.1878	36.8621	37.1395	37.1392	64.6754	45.4618	43.0031	47.2791	43.7719	43.5265	43.5265	47.4608	31.9886	33.6926	37.5819	34.2951	34.5211	34.5209	57.4867	43.1641	44.0982	49.4982	45.3766	45.3799	45.3799	54.9626	36.9782	36.7195	40.5977	37.1675	37.2725	37.2725	50.7561	38.2582	34.8182	38.3566	35.3553	35.5953	35.5953	50.4119
50.8174	31.7174	33.4672	37.7005	34.2889	34.6293	34.6292	52.1655	37.445	35.4767	39.8713	36.4091	36.7056	36.7053	65.7716	43.3461	42.5221	46.8745	43.2777	43.0576	43.0577	48.2652	33.4939	33.2087	37.1839	33.7838	34.0295	34.0293	58.461	44.1322	43.4939	48.9071	44.7149	44.7424	44.7423	55.8941	38.6729	36.1231	40.0383	36.551	36.6752	36.6751	51.6164	35.2072	34.3398	37.9734	34.8626	35.1209	35.1209	51.2663
51.6644	31.4028	33.0884	37.3833	33.8718	34.2265	34.2264	53.0349	34.2921	35.0441	39.5112	35.9426	36.2556	36.2553	66.8678	42.1982	42.0341	46.4317	42.7708	42.5765	42.5765	49.0696	32.8756	32.7183	36.7418	33.2605	33.5233	33.5231	59.4354	44.4939	42.8839	48.2721	44.0412	44.0917	44.0917	56.8257	40.1143	35.5196	39.437	35.923	36.0646	36.0646	52.4767	34.0598	33.8541	37.5491	34.3568	34.631	34.631	52.1208
52.5113	31.8295	32.7048	37.0281	33.4452	33.8115	33.8114	53.9043	34.4434	34.6057	39.1087	35.4641	35.7909	35.7906	67.964	43.745	41.5397	45.9519	42.2526	42.0841	42.0841	49.874	30.6914	32.2222	36.2573	32.7267	33.004	33.0038	60.4097	44.8603	42.269	47.5951	43.3571	43.4294	43.4294	57.7573	38.3347	34.9102	38.7958	35.2852	35.4425	35.4425	53.337	32.9305	33.3619	37.085	33.8396	34.1269	34.1269	52.9752
53.3583	32.4511	32.3167	36.6362	33.0104	33.3854	33.3853	54.7738	36.5355	34.1621	38.6652	34.975	35.3127	35.3124	69.0602	43.1628	41.0395	45.4363	41.7243	41.5815	41.5815	50.6785	29.7911	31.7209	35.7322	32.184	32.4731	32.4729	61.3841	43.7604	41.6497	46.8781	42.6642	42.7568	42.7568	58.6888	36.1491	34.2958	38.1171	34.6392	34.8104	34.8104	54.1972	31.2152	32.8641	36.5827	33.3122	33.6102	33.6102	53.8297
54.2053	31.6002	31.9245	36.2088	32.5684	32.9491	32.949	55.6432	35.9001	33.7138	38.1822	34.4766	34.8224	34.8222	70.1564	41.9932	40.5342	44.8864	41.1869	41.0696	41.0696	51.4829	30.9539	31.2152	35.1686	31.6339	31.932	31.9318	62.3584	44.0265	41.0265	46.1232	41.964	42.0754	42.0754	59.6204	34.9181	33.6773	37.4031	33.9868	34.1697	34.1697	55.0575	30.3492	32.3612	36.044	32.7763	33.0822	33.0822	54.6841
55.0522	28.9692	31.5284	35.7471	32.1203	32.5038	32.5037	56.5126	34.5253	33.2611	37.6613	33.9703	34.3213	34.321	71.2526	40.8234	40.0242	44.3034	40.6415	40.5494	40.5494	52.2873	32.0173	30.7056	34.5683	31.0779	31.3821	31.382	63.3328	48.4633	40.3999	45.3326	41.2579	41.3864	41.3864	60.552	33.6734	33.0556	36.6563	33.3293	33.5221	33.5221	55.9178	28.285	31.854	35.4707	32.233	32.5443	32.5443	55.5385
55.8992	30.0289	31.1287	35.2528	31.667	32.0503	32.0503	57.382	33.7738	32.8044	37.1041	33.4571	33.8105	33.8103	72.3488	41.487	39.51	43.6888	40.0893	40.0218	40.0218	53.0917	30.3194	30.1926	33.9338	30.5171	30.8248	30.8247	64.3071	50.7692	39.7705	44.5086	40.5472	40.691	40.691	61.4835	33.5377	32.4314	35.8793	32.6681	32.8687	32.8687	56.778	27.6336	31.3431	34.8647	31.6838	31.9976	31.9976	56.393
56.7461	31.5053	30.7257	34.7272	31.2094	31.5898	31.5897	58.2515	33.5435	32.3442	36.5126	32.9383	33.2912	33.291	73.445	40.8823	38.9921	43.0442	39.5311	39.4875	39.4876	53.8961	28.6591	29.6769	33.2671	29.9529	30.2613	30.2612	65.2815	48.0769	39.1387	43.6535	39.8331	39.9905	39.9905	62.4151	30.2124	31.8055	35.0745	32.0047	32.211	32.211	57.6383	28.6878	30.829	34.2279	31.1298	31.4435	31.4435	57.2474
57.5931	32.6632	30.3197	34.172	30.7483	31.1229	31.1228	59.1209	33.0399	31.8807	35.8887	32.4149	32.7645	32.7643	74.5412	39.1231	38.4708	42.3711	38.9679	38.9475	38.9476	54.7006	28.7386	29.1588	32.5708	29.3863	29.6927	29.6926	66.2558	49.3868	38.5049	42.7696	39.1169	39.286	39.2859	63.3467	29.6188	31.1786	34.2446	31.3402	31.5502	31.5502	58.4986	29.4191	30.3123	33.5626	30.5721	30.8831	30.8831	58.1018
58.44	29.7936	29.911	33.5889	30.2845	30.6506	30.6506	59.9903	29.1286	31.4144	35.2343	31.8879	32.2314	32.2312	75.6374	41.1575	37.9467	41.6712	38.4006	38.4025	38.4026	55.505	30.0466	28.6389	31.8472	28.8185	29.1203	29.1201	67.2302	50.5028	37.8696	41.8594	38.3996	38.5785	38.5784	64.2783	29.8302	30.5512	33.3923	30.6757	30.8873	30.8873	59.3589	28.604	29.7935	32.8707	30.0118	30.3176	30.3176	58.9563
59.287	31.5639	29.4997	32.9796	29.8189	30.1737	30.1737	60.8597	28.4995	30.9456	34.5515	31.3582	31.6929	31.6927	76.7336	45.9194	37.42	40.9462	37.83	37.8533	37.8533	56.3094	31.3506	28.1176	31.0987	28.2504	28.5449	28.5448	68.2045	52.0744	37.2332	40.9255	37.6822	37.869	37.869	65.2098	29.7477	29.9241	32.5203	30.0125	30.2236	30.2236	60.2191	27.4832	29.273	32.1545	29.4499	29.7479	29.7479	59.8107
60.1339	34.1327	29.0862	32.3459	29.352	29.693	29.693	61.7291	29.7179	30.4746	33.8425	30.8267	31.15	31.1498	77.8298	47.2736	36.8911	40.1978	37.257	37.3005	37.3005	57.1138	29.8556	27.5953	30.328	27.6829	27.9677	27.9676	69.1789	49.7146	36.5962	39.9701	36.9658	37.1585	37.1585	66.1414	29.4866	29.2976	31.6312	29.3514	29.5601	29.5601	61.0794	28.0201	28.7512	31.4163	28.8874	29.1751	29.1751	60.6652
60.9809	35.4913	28.6708	31.6896	28.8845	29.2092	29.2092	62.5986	32.3309	30.0017	33.1093	30.2942	30.6036	30.6034	78.926	46.639	36.3604	39.4277	36.6823	36.7449	36.7449	57.9182	27.1942	27.0725	29.5376	27.117	27.3896	27.3896	70.1532	46.4625	35.9589	38.9959	36.2512	36.448	36.4479	67.073	27.959	28.6725	30.7277	28.6934	28.8978	28.8978	61.9397	28.9186	28.2286	30.6582	28.325	28.6002	28.6002	61.5196
61.8279	34.3738	28.2536	31.0127	28.417	28.723	28.723	63.468	33.1331	29.5273	32.3543	29.7615	30.0545	30.0543	80.0221	45.1942	35.8282	38.6378	36.1065	36.187	36.1871	58.7227	27.1773	26.5495	28.7301	26.5533	26.8115	26.8114	71.1276	45.3216	35.3217	38.0053	35.5393	35.7382	35.7381	68.0045	28.2975	28.0492	29.8124	28.0393	28.2375	28.2375	62.8	28.3999	27.7057	29.8825	27.7636	28.024	28.024	62.374
62.6748	32.5166	27.8349	30.3171	27.9502	28.2351	28.2351	64.3374	30.9548	29.0516	31.5797	29.2294	29.5035	29.5034	81.1183	45.2812	35.2948	37.8298	35.5304	35.6276	35.6276	59.5271	27.8724	26.0268	27.9079	25.9927	26.2342	26.2341	72.1019	41.4064	34.6851	37.0009	34.8309	35.0299	35.0299	68.9361	29.5906	27.4282	28.888	27.39	27.5801	27.5801	63.6602	27.1061	27.1827	29.0916	27.204	27.4475	27.4475	63.2285
63.5218	32.2266	27.4151	29.6046	27.4844	27.7461	27.746	65.2068	31.5355	28.575	30.7876	28.6984	28.9515	28.9514	82.2145	43.1494	34.7605	37.0055	34.9547	35.0672	35.0672	60.3315	28.6138	25.5048	27.0737	25.4357	25.6585	25.6584	73.0763	37.1598	34.0494	35.985	34.1266	34.324	34.324	69.8677	29.3458	26.81	27.9571	26.7462	26.9265	26.9265	64.5205	27.3338	26.6601	28.2877	26.6469	26.8713	26.8713	64.0829
64.3687	30.3565	26.9942	28.8772	27.0203	27.2566	27.2565	66.0763	32.3145	28.0977	29.9805	28.1693	28.3992	28.3991	83.3107	41.788	34.2256	36.1668	34.3798	34.5064	34.5064	61.1359	26.7385	24.9838	26.2299	24.883	25.0851	25.0851	74.0506	33.1709	33.415	34.96	33.4272	33.6212	33.6212	70.7992	27.1984	26.195	27.0221	26.1085	26.2773	26.2773	65.3808	27.0195	26.1382	27.473	26.0928	26.2964	26.2964	64.9374
65.2157	28.3258	26.5726	28.1368	26.5582	26.7671	26.767	66.9457	31.5208	27.6202	29.1605	27.6425	27.8472	27.8471	84.4069	38.116	33.6903	35.3155	33.8064	33.9456	33.9456	61.9403	25.3252	24.4643	25.3791	24.3352	24.5147	24.5147	75.025	32.4208	32.7823	33.9285	32.7333	32.922	32.922	71.7308	26.699	25.5837	26.0856	25.4775	25.6333	25.6333	66.2411	27.5422	25.6175	26.6499	25.5425	25.7233	25.7233	65.7918
66.0627	26.4233	26.1505	27.3855	26.0985	26.2782	26.2781	67.8151	29.6896	27.1425	28.3298	27.1186	27.2962	27.2961	85.5031	37.498	33.1551	34.4533	33.2349	33.3854	33.3854	62.7448	24.9777	23.9465	24.5236	23.7927	23.948	23.9479	75.9993	31.9455	32.1516	32.8926	32.0454	32.2272	32.2272	72.6624	27.5118	24.9764	25.1498	24.8538	24.9951	24.9951	67.1013	26.122	25.0982	25.8204	24.9964	25.1528	25.1528	66.6462
66.9096	27.2018	25.7282	26.625	25.6417	25.7904	25.7903	68.6845	28.0948	26.6652	27.4908	26.5982	26.7468	26.7467	86.5993	35.8698	32.6201	33.5821	32.6659	32.8263	32.8263	63.5492	25.7326	23.4308	23.6659	23.256	23.3854	23.3854	76.9737	29.3121	31.5232	31.8548	31.364	31.5373	31.5373	73.5939	28.4798	24.3736	24.2171	24.2379	24.3633	24.3633	67.9616	25.0962	24.5808	24.9868	24.4551	24.5854	24.5854	67.5007
67.7566	27.509	25.3058	25.8573	25.188	25.3041	25.3041	69.554	28.865	26.1883	26.6454	26.0815	26.1995	26.1995	87.6955	33.7087	32.0857	32.7036	32.0997	32.2687	32.2687	64.3536	25.5571	22.9176	22.8082	22.7255	22.8277	22.8277	77.948	26.8341	30.8976	30.8172	30.6897	30.8528	30.8528	74.5255	24.9695	23.7757	23.2896	23.6303	23.7384	23.7384	68.8219	27.2408	24.0654	24.1511	23.919	24.0219	24.0219	68.3551
68.6035	30.5505	24.8836	25.0842	24.7379	24.8199	24.8198	70.4234	28.8142	25.7123	25.796	25.5691	25.655	25.655	88.7917	32.8528	31.552	31.8196	31.537	31.7131	31.7131	65.158	23.297	22.4071	21.9528	22.2017	22.2752	22.2752	78.9224	26.5073	30.275	29.7819	30.0229	30.1743	30.1743	75.4571	24.3106	23.183	22.3695	23.0312	23.121	23.121	69.6821	30.1223	23.5525	23.3154	23.3884	23.4626	23.4626	69.2096
69.4505	31.9273	24.4618	24.3077	24.2916	24.338	24.338	71.2928	27.0461	25.2373	24.9446	25.0614	25.1137	25.1138	89.8879	32.6649	31.0194	30.9318	30.9779	31.1598	31.1597	65.9624	22.7286	21.8998	21.1016	21.6847	21.7284	21.7284	79.8967	27.1965	29.6557	28.751	29.364	29.5021	29.5021	76.3887	23.3203	22.5958	21.4587	22.4411	22.5114	22.5114	70.5424	30.3764	23.0424	22.4816	22.8639	22.9081	22.9081	70.064
70.2974	28.8365	24.0406	23.5293	23.8493	23.859	23.8589	72.1622	25.6066	24.7636	24.0931	24.5586	24.5761	24.5762	90.9841	30.9557	30.4881	30.0418	30.4229	30.6092	30.6091	66.7669	22.7276	21.3959	20.2569	21.1749	21.1878	21.1878	80.8711	24.6438	29.0402	27.7266	28.7132	28.8369	28.8369	77.3202	23.7188	22.0146	20.5591	21.8603	21.9101	21.9101	71.4027	29.4469	22.5353	21.6517	22.3458	22.3589	22.3589	70.9184
71.1444	28.8442	23.6204	22.751	23.4114	23.3831	23.3831	73.0317	25.3015	24.2916	23.2436	24.0611	24.0427	24.0427	92.0803	28.5295	29.9583	29.1513	29.8723	30.0616	30.0616	67.5713	23.3602	20.8957	19.4205	20.6727	20.6537	20.6538	81.8454	23.952	28.4286	26.7105	28.071	28.1788	28.1788	78.2518	22.6833	21.4396	19.6725	21.2891	21.3175	21.3175	72.263	29.1704	22.0316	20.8274	21.8343	21.8155	21.8155	71.7729
71.9913	28.1034	23.2011	21.9744	22.978	22.9107	22.9107	73.9011	27.4745	23.8214	22.3979	23.5691	23.5137	23.5138	93.1765	27.7922	29.4303	28.2619	29.3265	29.5175	29.5175	68.3757	22.5221	20.3995	18.5941	20.1781	20.1265	20.1266	82.8198	24.0863	27.8212	25.7045	27.4376	27.5284	27.5284	79.1834	20.8303	20.8711	18.8004	20.7276	20.7339	20.7339	73.1232	29.1741	21.5315	20.0105	21.3297	21.2781	21.2781	72.6273
72.8383	25.7296	22.7832	21.201	22.5493	22.4421	22.4421	74.7705	26.7887	23.3532	21.5578	23.083	22.9897	22.9898	94.2727	26.4666	28.9043	27.3751	28.7857	28.9771	28.9771	69.1801	21.7131	19.9076	17.7796	19.6914	19.6065	19.6066	83.7941	25.2101	27.2184	24.7102	26.8132	26.8859	26.8859	80.1149	20.0349	20.3094	17.9443	20.1761	20.1595	20.1595	73.9835	27.539	21.0353	19.2026	20.8322	20.7471	20.7471	73.4817
73.6853	24.2723	22.3667	20.4325	22.1255	21.9776	21.9776	75.64	26.0499	22.8874	20.725	22.6029	22.4708	22.471	95.3689	25.2438	28.3806	26.4924	28.2501	28.4407	28.4406	69.9846	21.6616	19.4203	16.9784	19.2127	19.094	19.0941	84.7685	24.5703	26.6205	23.7294	26.1981	26.2516	26.2516	81.0465	20.1589	19.7548	17.1057	19.6348	19.5947	19.5947	74.8438	24.6739	20.5432	18.4053	20.3422	20.223	20.223	74.3362
74.5322	21.4938	21.9518	19.6702	21.7068	21.5174	21.5175	76.5094	25.9329	22.4242	19.9012	22.1291	21.9576	21.9578	96.4651	24.2857	27.8593	25.6152	27.72	27.9085	27.9085	70.789	22.3032	18.9377	16.192	18.7422	18.5892	18.5893	85.7428	23.1715	26.0276	22.7635	25.5925	25.6258	25.6258	81.9781	20.2729	19.2076	16.2857	19.1037	19.0397	19.0397	75.7041	21.0828	20.0555	17.6199	19.8597	19.7059	19.7059	75.1906
75.3792	20.5399	21.5389	18.9157	21.2933	21.0619	21.0619	77.3788	25.6569	21.9637	19.0879	21.6617	21.4502	21.4504	97.5612	25.7724	27.3407	24.7448	27.1957	27.3809	27.3809	71.5934	22.466	18.4601	15.4218	18.28	18.0924	18.0925	86.7172	24.0277	25.44	21.8139	24.9965	25.0087	25.0088	82.9096	18.9757	18.6678	15.4856	18.583	18.4946	18.4946	76.5643	16.6234	19.5725	16.8478	19.3849	19.1962	19.1962	76.0451
76.2261	21.1247	21.128	18.1702	20.8852	20.6113	20.6113	78.2482	26.0779	21.5062	18.2864	21.2008	20.949	20.9492	98.6574	26.6399	26.825	23.8827	26.6773	26.8581	26.858	72.3978	20.7297	17.9878	14.669	17.8262	17.6038	17.6039	87.6915	26.1109	24.858	20.8818	24.4102	24.4006	24.4007	83.8412	18.5877	18.1359	14.7062	18.0727	17.9597	17.9597	77.4246	16.1685	19.0943	16.0902	18.918	18.694	18.694	76.8995
77.0731	20.4172	20.7193	17.435	20.4825	20.1656	20.1657	79.1176	23.2308	21.0519	17.4982	20.7467	20.4541	20.4543	99.7536	26.0249	26.3123	23.0299	26.165	26.3402	26.3402	73.2022	18.0274	17.521	13.9346	17.3809	17.1234	17.1236	88.6659	24.1672	24.2818	19.9685	23.8338	23.8017	23.8017	84.7728	18.4596	17.612	13.9485	17.573	17.435	17.435	78.2849	15.2612	18.6212	15.3483	18.459	18.1997	18.1997	77.7539
77.92	17.3824	20.313	16.7112	20.0853	19.7253	19.7253	79.9871	20.0936	20.601	16.7244	20.2994	19.9658	19.966	100.85	24.9398	25.803	22.1878	25.659	25.8275	25.8275	74.0066	15.4499	17.0599	13.2196	16.944	16.6516	16.6518	89.6402	22.6918	23.7116	19.075	23.2674	23.212	23.2121	85.7043	18.0435	17.0962	13.2132	17.0837	16.9207	16.9207	79.1452	14.6407	18.1534	14.6231	18.0081	17.7133	17.7133	78.6084
78.767	15.7781	19.9093	16	19.6937	19.2903	19.2904	80.8565	17.082	20.1537	15.9663	19.859	19.4842	19.4845	101.946	23.8472	25.2971	21.3572	25.1593	25.3202	25.3201	74.8111	14.0594	16.6046	12.5248	16.5157	16.1884	16.1885	90.6146	21.7017	23.1476	18.2023	22.711	22.6319	22.6319	86.6359	14.6179	16.5888	12.5009	16.605	16.4169	16.4169	80.0054	14.5066	17.6911	13.9154	17.5653	17.2351	17.2351	79.4628
79.614	14.5394	19.5083	15.3022	19.3078	18.8609	18.861	81.7259	14.7472	19.7102	15.2247	19.4256	19.0097	19.0099	103.042	22.3189	24.7949	20.5394	24.6662	24.8184	24.8183	75.6155	12.8051	16.1554	11.8509	16.096	15.7338	15.734	91.5889	20.2566	22.59	17.3512	22.1646	22.0613	22.0613	87.5675	13.4398	16.0899	11.8122	16.1369	15.9237	15.9237	80.8657	14.6533	17.2344	13.2262	17.1307	16.7652	16.7652	80.3173
80.4609	13.3092	19.1102	14.6189	18.9277	18.4373	18.4373	82.5954	13.0946	19.2707	14.5006	18.9993	18.5422	18.5425	104.138	20.2127	24.2966	19.7352	24.1797	24.3223	24.3222	76.4199	11.6415	15.7125	11.1986	15.6847	15.288	15.2882	92.5633	17.1821	22.039	16.5224	21.6284	21.5004	21.5004	88.4991	12.6899	15.5996	11.1473	15.6792	15.441	15.441	81.726	14.2835	16.7836	12.556	16.7043	16.3037	16.3037	81.1717
81.3079	11.9564	18.7152	13.9508	18.5533	18.0194	18.0195	83.4648	12.3265	18.8353	13.7949	18.5801	18.082	18.0823	105.235	17.9469	23.8022	18.9455	23.6999	23.832	23.832	77.2243	10.9969	15.2759	10.5683	15.282	14.8511	14.8513	93.5376	15.722	21.4949	15.7166	21.1023	20.9493	20.9493	89.4306	12.3159	15.1182	10.5066	15.232	14.9689	14.9689	82.5862	12.9169	16.3388	11.9054	16.2861	15.8508	15.8508	82.0261
82.1548	10.8968	18.3234	13.2986	18.1847	17.6076	17.6076	84.3342	10.1677	18.4042	13.1083	18.168	17.6291	17.6294	106.331	14.3772	23.3121	18.1711	23.2269	23.3477	23.3476	78.0288	9.42718	14.8458	9.96042	14.8878	14.4231	14.4233	94.512	13.7108	20.9576	14.9344	20.5862	20.408	20.4081	90.3622	9.55107	14.6456	9.89032	14.7952	14.5074	14.5074	83.4465	11.5669	15.9001	11.2751	15.8762	15.4064	15.4064	82.8806
83.0018	9.17434	17.9349	12.6631	17.822	17.2017	17.2018	85.2036	8.22247	17.9776	12.4413	17.7631	17.1837	17.1841	107.427	10.9615	22.8262	17.4128	22.7608	22.8694	22.8694	78.8332	7.63933	14.4224	9.37517	14.502	14.004	14.0042	95.4863	9.94996	20.4275	14.1761	20.0803	19.8766	19.8767	91.2938	7.95239	14.182	9.29845	14.3686	14.0565	14.0565	84.3068	8.89234	15.4677	10.6653	15.4745	14.9707	14.9707	83.735
83.8487	7.22145	17.5499	12.0447	17.4651	16.802	16.8021	86.073	4.29088	17.5556	11.7944	17.3654	16.7459	16.7463	108.523	7.21352	22.3449	16.6712	22.3016	22.3974	22.3973	79.6376	5.4453	14.0058	8.8127	14.1247	13.5938	13.594	96.4607	6.96368	19.9046	13.4422	19.5844	19.3552	19.3552	92.2253	5.9165	13.7275	8.73099	13.9523	13.6161	13.6161	85.1671	5.76877	15.0418	10.0765	15.081	14.5437	14.5437	84.5895
[truncated: 13 more columns]

## Sheet: WAT-720
spike_1							spike_2							spike_3							spike_4							spike_5							spike_6							spike_7
Z-axis_1	Thickness-profile_1	skewed gaussian_1	gaussian_1	lognorm_1	gamma_1	chi2_1	Z-axis_2	Thickness-profile_2	skewed gaussian_2	gaussian_2	lognorm_2	gamma_2	chi2_2	Z-axis_3	Thickness-profile_3	skewed gaussian_3	gaussian_3	lognorm_3	gamma_3	chi2_3	Z-axis_4	Thickness-profile_4	skewed gaussian_4	gaussian_4	lognorm_4	gamma_4	chi2_4	Z-axis_5	Thickness-profile_5	skewed gaussian_5	gaussian_5	lognorm_5	gamma_5	chi2_5	Z-axis_6	Thickness-profile_6	skewed gaussian_6	gaussian_6	lognorm_6	gamma_6	chi2_6	Z-axis_7	Thickness-profile_7	skewed gaussian_7	gaussian_7	lognorm_7	gamma_7	chi2_7
0	2.49231	1.17623e-09	17.3325	0	0	0	0	2.20514	0.000279586	10.5418	0	0	0	0	0.86981	2.27169e-13	5.5752	0	0	0	0	1.43925	0.000198439	8.45999	0	0	0	0	0.67652	1.19518e-13	3.80842	0	0	0	0	1.73849	2.95965e-10	7.66688	0	0	0	0	2.44602	0.00204291	14.2522	0	0	0
0.951336	3.1512	4.75712e-08	18.1435	0	0	0	0.863068	2.1967	0.000913786	11.2698	0	0	0	0.896828	1.02861	4.40177e-12	6.05038	0	0	0	0.858021	0.98796	0.000598304	9.06297	0	0	0	0.829742	0.70807	1.54813e-12	4.14721	0	0	0	0.864735	1.2052	3.32588e-09	8.28265	0	0	0	0.997211	2.09774	0.00673461	15.0484	0	0	0
1.90268	4.1383	1.3943e-06	18.9704	0	0	0	1.72614	1.88128	0.00279376	12.0294	0	0	0	1.79366	1.47046	7.3627e-11	6.55455	0	0	0	1.71604	1.17603	0.00170503	9.69464	0	0	0	1.65948	0.83715	1.80128e-11	4.50843	0	0	0	1.72947	1.15637	3.29569e-08	8.93265	0	0	0	1.99442	1.9182	0.0204395	15.8696	0	0	0
2.85401	3.95731	2.96599e-05	19.8121	0	0	0	2.5892	2.99669	0.00799266	12.8202	0	0	0	2.69048	1.93646	1.06338e-09	7.08826	0	0	0	2.57405	1.78567	0.00459373	10.3551	0	0	0	2.48923	1.27895	1.88288e-10	4.89277	0	0	0	2.5942	1.81373	2.8806e-07	9.61725	0	0	0	2.99163	2.91634	0.0571463	16.7149	0	0	0
3.80535	2.45918	0.000458814	20.6671	0	0	0	3.45227	2.76175	0.021405	13.6419	0	0	0	3.58731	1.44554	1.32651e-08	7.65199	0	0	0	3.43207	1.98583	0.0117042	11.0442	0	0	0	3.31897	1.59396	1.76849e-09	5.30082	0	0	0	3.45893	2.23172	2.22162e-06	10.3367	0	0	0	3.98885	3.46137	0.147291	17.5835	0	0	0
4.75669	3.96482	0.00517443	21.534	0	0	0	4.31534	1.39099	0.0536852	14.4937	0	0	0	4.48414	1.48511	1.42973e-07	8.24605	0	0	0	4.29009	1.8692	0.0282098	11.7619	0	0	0	4.14871	1.29729	1.49281e-08	5.73311	0	0	0	4.32367	1.96221	1.51242e-05	11.091	0	0	0	4.98606	3.8059	0.350274	18.4744	0.00939552	0	0
5.70802	5.83681	0.0426921	22.4112	0	0	0	5.17841	2.25411	0.126162	15.3749	0	0	0	5.38097	1.79198	1.33198e-06	8.87065	0	0	0	5.14811	1.98689	0.0643423	12.5078	0	0	0	4.97845	0.99487	1.13273e-07	6.19009	0	0	0	5.1884	2.1419	9.09276e-05	11.8802	0	0	0	5.98327	3.73749	0.769359	19.3865	0.444573	0	0
6.65936	8.67717	0.258913	23.2972	0	0	0	6.04148	3.10522	0.277972	16.2844	0	0	0	6.27779	2.23039	1.07311e-05	9.52581	0	0	0	6.00613	2.02066	0.138935	13.2814	0	0	0	5.8082	1.5848	7.72821e-07	6.6721	0	0	0	6.05314	2.3759	0.00048303	12.7038	0	0	0	6.98048	3.54567	1.56272	20.3186	2.01842	0	0
7.6107	10.0846	1.16192	24.1901	0	5.39098	0	6.90454	4.00595	0.574612	17.2209	0	0	0	7.17462	2.64223	7.48072e-05	10.2114	0	0	0	6.86414	2.50871	0.284155	14.082	0	0	0	6.63794	1.70374	4.74225e-06	7.17939	0	0	0	6.91787	2.61729	0.00226878	13.5614	0	0	0	7.97769	4.71147	2.9398	21.2692	4.7544	0	0
8.56203	9.27052	3.89576	25.0881	3.41953	17.8323	0	7.76761	5.4493	1.11535	18.1831	0	0	0	8.07145	2.75033	0.000451535	10.9272	5.89932e-09	0	0	7.72216	3.28224	0.550774	14.909	0	0	0	7.46768	1.51131	2.61816e-05	7.71209	0	0	0	7.78261	3.08096	0.00942953	14.4522	0	0	0	8.9749	5.83417	5.13141	22.2368	8.32493	0	0
9.51337	9.74275	9.89723	25.9892	14.1211	24.4574	8.97307	8.63068	5.37749	2.03491	19.1693	0.00381042	0	0	8.96828	2.77919	0.00236183	11.6725	0.00802626	0	0	8.58018	3.55437	1.01239	15.7614	0	0	0	8.29742	1.66905	0.000130102	8.27019	0	0	0	8.64734	2.65806	0.0347122	15.3753	0	0	0	9.97211	7.54265	8.3294	23.2198	12.3706	0	0
10.4647	15.3501	19.4516	26.8915	23.8772	29.2495	28.6352	9.49375	4.68283	3.49366	20.1776	0.772649	0	0	9.8651	3.54146	0.0107164	12.4469	0.172094	0	0	9.4382	3.57844	1.7661	16.6379	0.0401613	0	0	9.12716	2.10883	0.000582161	8.85357	0	0	0	9.51207	2.94031	0.113312	16.3295	0	0	0	10.9693	11.6233	12.6078	24.2163	16.6003	11.0434	11.0434
11.416	26.5117	30.482	27.7929	31.5313	32.9795	34.9354	10.3568	4.35676	5.65241	21.2061	3.6712	0	0	10.7619	4.1039	0.0422314	13.2494	0.805373	0	0	10.2962	4.6394	2.92658	17.5373	0.880545	0	0	9.95691	2.65233	0.00234701	9.46195	0	0	0	10.3768	3.90938	0.328474	17.3135	0	0	0	11.9665	17.7977	17.8554	25.2245	20.8043	20.3031	20.3031
12.3674	41.1051	39.7115	28.6912	37.3274	35.9789	38.8725	11.2199	6.10346	8.63241	22.2525	8.23345	0	0	11.6588	3.97635	0.144771	14.0788	2.09773	0	0	11.1542	4.8654	4.61155	18.4582	3.18133	0	0	10.7866	3.12833	0.0085305	10.0949	0	0	0	11.2415	5.00575	0.847094	18.3254	0.03198	0	0	12.9637	22.2364	23.7554	26.2422	24.8426	26.3386	26.3386
13.3187	50.2619	45.2965	29.5843	41.6538	38.4311	41.633	12.083	11.5437	12.4696	23.3143	13.5853	0	0	12.5556	5.00408	0.432547	14.9339	4.04773	0	0	12.0122	4.96653	6.91857	19.3988	6.64565	2.03025	0	11.6164	2.81664	0.0279747	10.7518	0	0	0	12.1063	5.44713	1.94781	19.3635	1.40508	0	0	13.961	30.3476	29.8355	27.2672	28.6276	30.9189	30.9189
14.2701	57.0485	47.7181	30.4697	44.8458	40.4518	43.6616	12.946	20.79	17.0779	24.3889	19.0855	18.0505	18.0519	13.4524	5.78586	1.1292	15.8132	6.53726	0	0	12.8703	7.13093	9.8971	20.3573	10.7673	11.0057	0	12.4461	3.65261	0.0828493	11.432	0	0	0	12.971	6.08205	4.00491	20.4256	5.14184	0	0	14.9582	36.2731	35.5764	28.2974	32.1095	34.5835	34.5835
15.2214	55.4959	48.4336	31.3452	47.1645	42.1211	45.182	13.8091	26.6474	22.2392	25.4735	24.3488	25.9963	25.9966	14.3492	6.06643	2.58393	16.7148	9.40515	0	0	13.7283	12.739	13.523	21.3318	15.1304	16.9467	11.9495	13.2759	4.09699	0.221839	12.1345	0	0	0	13.8357	7.44846	7.3899	21.5092	10.3062	4.75662	4.75657	15.9554	39.891	40.5401	29.3303	35.265	37.5919	37.5919
16.1727	51.1303	48.5209	32.2086	48.8081	43.4971	46.326	14.6722	27.8692	27.6292	26.5651	29.17	31.4528	31.4526	15.2461	7.71105	5.20417	17.6369	12.4911	5.42339	5.42339	14.5863	20.2464	17.6846	22.32	19.4506	21.6748	19.9057	14.1056	4.08821	0.537794	12.8582	0	0	0	14.7005	11.1297	12.2943	22.6117	15.9545	16.8371	16.8371	16.9526	43.9316	44.4654	30.3634	38.0883	40.0961	40.0961
17.1241	45.7436	48.4364	33.0573	49.9272	44.6242	47.1787	15.5352	28.9052	32.8756	27.6606	33.4573	35.5715	35.5712	16.1429	9.04947	9.27506	18.5772	15.656	13.2959	13.2959	15.4443	24.1561	22.1876	23.3196	23.5511	25.6075	25.2924	14.9354	5.39482	1.1824	13.6018	0.00526232	0	0	15.5652	17.089	18.5501	23.7303	21.502	23.7986	23.7986	17.9498	52.1461	47.2974	31.3941	40.5856	42.1954	42.1954
18.0754	40.4148	48.3061	33.889	50.6364	45.5376	47.7994	16.3983	32.1453	37.6323	28.7566	37.186	38.802	38.8016	17.0397	13.383	14.73	19.5332	18.789	18.6648	18.6648	16.3023	26.4781	26.7799	24.3282	27.3317	28.9432	29.4057	15.7651	6.15039	2.36271	14.3639	1.08182	1.68706	0	16.4299	23.1336	25.5741	24.8618	26.6384	28.9536	28.9536	18.947	52.4781	49.1508	32.4197	42.7705	43.9601	43.9601
19.0267	49.0225	48.1538	34.7015	51.0237	46.2655	48.231	17.2614	32.877	41.645	29.8497	40.3695	41.3815	41.3811	17.9366	19.0057	21.0334	20.5025	21.8067	22.8531	22.8531	17.1604	30.2301	31.1927	25.343	30.7433	31.8	32.6912	16.5948	6.76696	4.30231	15.1429	4.29444	8.08797	0	17.2947	32.0925	32.5138	26.0029	31.2225	33.0128	33.0128	19.9442	52.1805	50.2362	33.4376	44.6607	45.4424	45.4424
19.9781	57.7338	47.9828	35.4922	51.1573	46.8311	48.5059	18.1244	39.0685	44.7879	30.9363	43.0417	43.4562	43.4558	18.8334	23.2386	27.3125	21.482	24.6503	26.2587	26.2587	18.0184	35.5594	35.186	26.3612	33.77	34.258	35.3736	17.4246	6.78325	7.16275	15.9369	8.58296	12.6567	4.49531	18.1594	40.7147	38.5425	27.1501	35.21	36.2952	36.2952	20.9414	45.9438	50.7832	34.4449	46.2765	46.6826	46.6826
20.9294	61.0641	47.7936	36.2588	51.0904	47.2542	48.6493	18.9875	52.97	47.0634	32.0128	45.2462	45.125	45.1247	19.7302	31.895	32.7002	22.4689	27.281	29.0801	29.0801	18.8764	34.6141	38.5857	27.3801	36.4163	36.3758	37.5881	18.2543	8.51099	10.9483	16.744	13.077	16.3724	13.7842	19.0242	45.256	43.1396	28.2996	38.6098	38.9831	38.9831	21.9386	42.69	50.9889	35.4388	47.6393	47.7128	47.7128
21.8808	58.55	47.5865	36.999	50.865	47.5512	48.6814	19.8506	64.3584	48.5721	33.0754	47.0297	46.4592	46.4589	20.627	42.4892	36.6749	23.4599	29.6759	31.4375	31.4375	19.7344	36.483	41.3042	28.3965	38.6992	38.1983	39.4248	19.0841	13.6871	15.4435	17.5619	17.3257	19.4963	18.86	19.8889	47.7064	46.204	29.4476	41.4579	41.1949	41.1949	22.9359	44.047	50.9957	36.4163	48.7703	48.5593	48.5593
22.8321	51.8149	47.3616	37.7106	50.5141	47.7365	48.6184	20.7136	66.055	49.4678	34.1204	48.4388	47.5125	47.5122	21.5239	46.7288	39.1833	24.4517	31.8241	33.4132	33.4132	20.5924	44.2344	43.3389	29.4072	40.6423	39.7617	40.9482	19.9138	18.3205	20.2319	18.3884	21.1315	22.1598	22.5215	20.7536	49.0145	47.9699	30.59	43.803	43.0141	43.0141	23.9331	44.8854	50.8935	37.3747	49.6902	49.2438	49.2438
23.7834	37.4211	47.1192	38.3913	50.0644	47.8224	48.4738	21.5767	62.5572	49.9146	35.1438	49.5176	48.3269	48.3267	22.4207	43.7838	40.5181	25.4406	33.7241	35.0668	35.0668	21.4504	52.9762	44.7551	30.4092	42.2725	41.0955	42.2069	20.7436	22.7749	24.8058	19.221	24.4303	24.4451	25.3501	21.6184	47.5155	48.8199	31.7226	45.6975	44.5027	44.5027	24.9303	39.7413	50.7322	38.311	50.4187	49.7847	49.7847
24.7348	37.8365	46.8597	39.039	49.537	47.8197	48.2587	22.4398	51.4224	50.057	36.1418	50.3071	48.9363	48.9361	23.3175	39.0201	41.087	26.4231	35.3804	36.4446	36.4446	22.3085	54.4582	45.6585	31.3989	43.6179	42.2247	43.2386	21.5733	28.6066	28.7199	20.0571	27.2247	26.4098	27.6013	22.4831	46.5676	49.1172	32.8411	47.1938	45.7091	45.7091	25.9275	43.3199	50.5369	39.2223	50.9745	50.1978	50.1978
25.6861	40.0507	46.5833	39.6516	48.9491	47.7381	47.9827	23.3028	45.8622	50.0054	37.1105	50.8443	49.3681	49.368	24.2143	35.7044	41.2361	27.3954	36.8025	37.5832	37.5832	23.1665	49.9915	46.1681	32.3732	44.7061	43.1707	44.0737	22.403	35.581	31.7151	20.8938	29.5481	28.0974	29.418	23.3478	47.6266	49.122	33.9412	48.3408	46.672	46.672	26.9247	48.1673	50.3187	40.1058	51.375	50.4966	50.4966
26.6374	42.0646	46.2903	40.2271	48.3145	47.5858	47.6538	24.1659	40.1086	49.8351	38.0462	51.1628	49.6455	49.6454	25.1112	35.7268	41.1853	28.3536	38.0023	38.5125	38.5125	24.0245	43.1745	46.3952	33.3286	45.5635	43.952	44.7371	23.2328	39.0249	33.7559	21.7284	31.4469	29.5424	30.8915	24.2126	52.5932	48.9854	35.0183	49.1836	47.4228	47.4228	27.9219	48.4821	50.0823	40.9585	51.6362	50.693	50.693
27.5888	43.2447	45.9811	40.7636	47.6444	47.3705	47.2789	25.029	37.5641	49.5925	38.945	51.2921	49.7877	49.7877	26.008	35.9865	41.0465	29.2938	38.9942	39.2577	39.2577	24.8825	40.7531	46.431	34.2617	46.215	44.5846	45.2495	24.0625	38.1751	34.9803	22.5578	32.9704	30.7729	32.0853	25.0773	54.7986	48.7811	36.0682	49.763	47.988	47.988	28.9191	47.7816	49.8296	41.7779	51.7728	50.7974	50.7974
28.5401	40.6942	45.656	41.2595	46.9481	47.0988	46.8641	25.892	42.9203	49.304	39.8033	51.2585	49.8115	49.8115	26.9048	33.7998	40.8663	30.2122	39.7931	39.8399	39.8399	25.7405	43.0896	46.3429	35.1691	46.6836	45.083	45.6285	24.8923	35.0335	35.6073	23.379	34.1665	31.8125	33.0462	25.942	50.0873	48.5394	37.0863	50.1151	48.39	48.39	29.9163	48.9393	49.5615	42.561	51.7984	50.819	50.819
29.4915	36.9139	45.3154	41.7129	46.2329	46.7767	46.4146	26.7551	49.3134	48.9831	40.6174	51.0854	49.7311	49.7311	27.8017	37.2873	40.6611	31.1046	40.4144	40.2774	40.2774	26.5985	40.595	46.1766	36.0474	46.9901	45.4598	45.8892	25.722	33.3988	35.8516	24.1887	35.0794	32.6815	33.8099	26.8068	48.3572	48.2714	38.0682	50.2717	48.6478	48.6478	30.9136	51.3202	49.2782	43.3053	51.7252	50.7661	50.7661
30.4428	38.1745	44.9597	42.1224	45.5051	46.4097	45.935	27.6182	52.4666	48.6366	41.384	50.793	49.559	49.559	28.6985	38.5496	40.4359	31.9672	40.8735	40.5862	40.5862	27.4566	37.9305	45.9605	36.8933	47.1538	45.7265	46.0447	26.5517	34.264	35.8771	24.9838	35.7489	33.3973	34.4047	27.6715	47.5785	47.9808	39.0095	50.261	48.7782	48.7782	31.9108	44.0162	48.9801	44.0084	51.5645	50.6458	50.6458
31.3941	38.0152	44.5892	42.4866	44.7696	46.0027	45.4294	28.4812	49.4835	48.2676	42.0996	50.3992	49.306	49.3061	29.5953	38.198	40.1923	32.7962	41.1852	40.7801	40.7801	28.3146	41.885	45.7108	37.7034	47.1919	45.8933	46.1064	27.3815	33.5183	35.7874	25.7611	36.21	33.9754	34.8537	28.5362	42.5542	47.6687	39.9061	50.1076	48.7955	48.7955	32.908	45.9158	48.6676	44.6676	51.3264	50.4649	50.4649
32.3455	37.1456	44.2044	42.8043	44.0305	45.56	44.9013	29.3443	47.7212	47.8778	42.7613	49.9197	48.9819	48.9819	30.4921	36.718	39.9308	33.5875	41.3638	40.8715	40.8715	29.1726	46.2745	45.4366	38.4746	47.1198	45.9694	46.0843	28.2112	34.2814	35.6386	26.5173	36.4933	34.4292	35.1758	29.401	39.7062	47.3359	40.7538	49.8329	48.7124	48.7124	33.9052	54.2107	48.3409	45.2808	51.0201	50.2293	50.2293
33.2968	40.0093	43.8057	43.0744	43.2912	45.0857	44.3539	30.2074	42.5135	47.4681	43.3661	49.3682	48.5949	48.595	31.389	39.0222	39.6519	34.3376	41.4228	40.8713	40.8713	30.0306	46.0797	45.1425	39.2038	46.9515	45.9632	45.9873	29.041	40.4716	35.4572	27.2492	36.6255	34.7709	35.387	30.2657	39.0803	46.9828	41.5486	49.4555	48.5402	48.5402	34.9024	55.6616	48.0003	45.8459	50.6539	49.9443	49.9443
34.2481	43.1253	43.3935	43.2959	42.5545	44.5835	43.79	31.0704	42.2649	47.0392	43.9113	48.7565	48.1527	48.1528	32.2858	39.0795	39.3559	35.0429	41.3748	40.7891	40.7891	30.8886	46.1928	44.8306	39.8881	46.6995	45.8825	45.8232	29.8707	42.2997	35.254	27.9536	36.6296	35.0114	35.5009	31.1304	38.0553	46.61	42.2868	48.9917	48.289	48.289	35.8996	53.5956	47.6462	46.3607	50.2353	49.6147	49.6147
35.1995	44.8526	42.9683	43.4682	41.8225	44.0566	43.2122	31.9335	42.5149	46.5917	44.3944	48.0951	47.662	47.6622	33.1826	35.7149	39.0433	35.6999	41.2317	40.6337	40.6337	31.7467	47.4246	44.5023	40.5246	46.3748	45.7341	45.5991	30.7005	41.3301	35.0332	28.6273	36.5254	35.1604	35.5291	31.9952	42.2697	46.2179	42.9648	48.4555	47.9675	47.9675	36.8968	52.685	47.2789	46.8234	49.771	49.2451	49.2451
36.1508	43.1818	42.5305	43.5905	41.0971	43.5081	42.6227	32.7966	43.6718	46.1262	44.8133	47.3931	47.1289	47.129	34.0795	35.1862	38.7144	36.3054	41.0043	40.4129	40.4129	32.6047	44.7942	44.1583	41.1106	45.9874	45.5245	45.3215	31.5302	37.5921	34.7963	29.2673	36.3301	35.2267	35.4817	32.8599	44.0315	45.807	43.5794	47.8593	47.5838	47.5838	37.894	53.6294	46.8987	47.2325	49.2672	48.8395	48.8395
37.1021	40.9811	42.0807	43.6624	40.3798	42.9408	42.0235	33.6596	47.0752	45.6434	45.166	46.6582	46.5586	46.5587	34.9763	38.6914	38.3698	36.8565	40.7027	40.1338	40.1338	33.4627	44.3826	43.7992	41.6437	45.546	45.2595	44.9958	32.3599	33.41	34.5441	29.8706	36.0584	35.2183	35.3677	33.7246	45.3398	45.378	44.1275	47.2136	47.145	47.145	38.8912	53.2415	46.506	47.5864	48.7294	48.4016	48.4016
38.0535	42.894	41.6193	43.6838	39.6716	42.3571	41.4165	34.5227	51.7691	45.1439	45.451	45.8975	45.956	45.9562	35.8731	40.9125	38.0098	37.3502	40.336	39.8029	39.8029	34.3207	45.1105	43.4253	42.1217	45.0585	44.9444	44.6273	33.1897	31.3637	34.2769	30.4344	35.7228	35.1425	35.1946	34.5894	47.4197	44.9315	44.6065	46.5276	46.6576	46.6576	39.8885	54.6377	46.1012	47.8838	48.1624	47.9346	47.9346
39.0048	40.8905	41.1467	43.6545	38.9736	41.7594	40.8033	35.3858	49.8787	44.6284	45.6669	45.1167	45.3256	45.3258	36.7699	40.0772	37.6351	37.7841	39.9126	39.4258	39.4258	35.1787	47.5842	43.0371	42.5424	44.5319	44.5841	44.2207	34.0194	28.0062	33.9952	30.9559	35.3343	35.006	34.9696	35.4541	48.3328	44.4679	45.0138	45.8093	46.1275	46.1275	40.8857	49.7383	45.6846	48.1236	47.5707	47.4418	47.4418
39.9562	37.4262	40.6635	43.5747	38.2865	41.1498	40.1854	36.2489	51.0362	44.0975	45.8127	44.3211	44.6712	44.6714	37.6668	37.524	37.2461	38.156	39.44	39.0079	39.0079	36.0367	48.9421	42.6351	42.9042	43.9724	44.1832	43.7802	34.8492	26.731	33.6994	31.4328	34.9021	34.8148	34.6985	36.3188	45.887	43.988	45.3476	45.0656	45.5598	45.5598	41.8829	50.8332	45.2567	48.3049	46.9582	46.9259	46.9259
40.9075	36.656	40.1702	43.4446	37.6109	40.5302	39.564	37.1119	49.9253	43.5519	45.8877	43.5152	43.9964	43.9966	38.5636	39.2891	36.8433	38.464	38.9253	38.554	38.554	36.8948	45.9246	42.2197	43.2053	43.3853	43.7458	43.3095	35.6789	29.6079	33.3898	31.8626	34.4343	34.5745	34.3869	37.1836	40.7955	43.4924	45.606	44.3024	44.9594	44.9594	42.8801	48.8488	44.8178	48.4272	46.3285	46.3896	46.3896
41.8588	40.0526	39.6673	43.2647	36.947	39.9024	38.9405	37.975	49.6632	42.9924	45.8916	42.7028	43.3045	43.3047	39.4604	38.2698	36.4272	38.7064	38.3747	38.0682	38.0682	37.7528	42.3825	41.7914	43.4445	42.7756	43.2758	42.8123	36.5087	33.3755	33.0669	32.2432	33.9378	34.2901	34.0396	38.0483	43.5238	42.9817	45.7878	43.5249	44.3305	44.3305	43.8773	43.3956	44.3682	48.4899	45.6848	45.8352	45.8352
42.8102	41.0474	39.1553	43.0355	36.2954	39.2679	38.3158	38.8381	40.9777	42.4197	45.8245	41.8873	42.5982	42.5984	40.3572	37.1805	35.9985	38.882	37.7937	37.5548	37.5548	38.6108	39.5092	41.3507	43.6207	42.1476	42.7768	42.2916	37.3384	34.4787	32.7312	32.5728	33.4185	33.9662	33.661	38.913	50.5733	42.4565	45.8921	42.7374	43.6771	43.6771	44.8745	39.8115	43.9086	48.4927	45.0299	45.265	45.265
43.7615	38.4665	38.6347	42.758	35.656	38.6284	37.691	39.7011	36.4233	41.8344	45.6865	41.0714	41.8804	41.8805	41.2541	34.2184	35.5576	38.9899	37.1876	37.0171	37.0171	39.4688	40.8813	40.8981	43.7332	41.5049	42.2518	41.7504	38.1681	33.6608	32.3831	32.8496	32.8814	33.6072	33.255	39.7778	51.8218	41.9177	45.9182	41.944	43.0028	43.0028	45.8717	39.3747	43.4391	48.4358	44.3665	44.681	44.681
44.7129	38.7328	38.1061	42.4329	35.0292	37.9851	37.0669	40.5642	37.0236	41.2373	45.4783	40.2578	41.1532	41.1534	42.1509	38.9227	35.1052	39.0295	36.5607	36.4586	36.4586	40.3268	37.8933	40.4339	43.7815	40.8511	41.7041	41.1913	38.9979	32.7993	32.023	33.0724	32.331	33.2169	32.8251	40.6425	47.2067	41.3658	45.8662	41.1477	42.3107	42.3107	46.8689	38.6414	42.9603	48.3192	43.6967	44.085	44.085
45.6642	41.1966	37.5699	42.0616	34.4149	37.3393	36.4443	41.4273	37.5848	40.6292	45.2009	39.4485	40.419	40.4192	43.0477	39.8921	34.6418	39.0006	35.9172	35.8823	35.8823	41.1849	36.842	39.9589	43.7653	40.189	41.1363	40.6169	39.8276	28.2981	31.6514	33.2399	31.7708	32.799	32.3746	41.5072	45.5252	40.8016	45.7362	40.3515	41.6039	41.6039	47.8661	36.9913	42.4725	48.1435	43.0226	43.4788	43.4788
46.6155	42.2011	37.0267	41.6451	33.8131	36.6921	35.8241	42.2903	38.8177	40.0108	44.8556	38.6453	39.6797	39.6798	43.9446	38.7999	34.168	38.9033	35.2608	35.2908	35.2908	42.0429	37.7833	39.4734	43.6848	39.5212	40.551	40.0292	40.6574	25.2543	31.2689	33.3513	31.2042	32.3567	31.9062	42.372	42.8425	40.2257	45.529	39.5577	40.885	40.885	48.8634	36.1829	41.9763	47.9092	42.346	42.8639	42.8639
47.5669	36.892	36.477	41.185	33.2237	36.0445	35.2067	43.1534	38.1039	39.3828	44.444	37.8497	38.937	38.9371	44.8414	36.0398	33.6844	38.7381	34.5947	34.6868	34.6868	42.9009	41.2338	38.978	43.5402	38.8501	39.9506	39.4303	41.4871	22.7412	30.876	33.4061	30.6338	31.8931	31.4226	43.2367	39.3162	39.6389	45.2455	38.7684	40.1565	40.1565	49.8606	37.4015	41.472	47.6173	41.6685	42.2419	42.2419
48.5182	35.7008	35.9214	40.6827	32.6468	35.3976	34.5928	44.0165	37.5437	38.746	43.9679	37.063	38.1925	38.1927	45.7382	37.0384	33.1917	38.506	33.9218	34.0724	34.0724	43.7589	41.7448	38.4731	43.3322	38.1776	39.3373	38.8221	42.3168	24.937	30.4731	33.404	30.062	31.411	30.9262	44.1014	34.5206	39.0419	44.8872	37.9853	39.4205	39.4205	50.8578	40.1067	40.96	47.2688	40.9916	41.614	41.614
49.4695	37.7257	35.3603	40.14	32.0821	34.7521	33.983	44.8795	36.9473	38.1012	43.4294	36.2864	37.4478	37.448	46.635	35.8496	32.6903	38.2082	33.2447	33.4497	33.4497	44.6169	38.4548	37.9595	43.0618	37.5055	38.7131	38.2064	43.1466	27.5713	30.0608	33.3449	29.4908	30.9129	30.4191	44.9662	33.5938	38.4354	44.456	37.2099	38.6791	38.6791	51.855	40.5256	40.4408	46.8649	40.3165	40.9816	40.9816
50.4209	37.012	34.7943	39.5586	31.5295	34.1089	33.3776	45.7426	36.6265	37.4491	42.8311	35.5207	36.7042	36.7043	47.5319	31.1636	32.181	37.8461	32.5657	32.8208	32.8208	45.4749	38.1757	37.4375	42.7301	36.8353	38.0797	37.5845	43.9763	28.2468	29.6396	33.2292	28.9218	30.4012	29.9033	45.8309	34.0726	37.8201	43.9539	36.4435	37.9341	37.9341	52.8522	38.4032	39.9149	46.4072	39.6443	40.3457	40.3457
51.3722	34.0313	34.2239	38.9404	30.9888	33.4687	32.7772	46.6057	33.4611	36.7904	42.1756	34.7666	35.9627	35.9628	48.4287	29.4231	31.6643	37.4217	31.8867	32.1872	32.1872	46.333	37.8602	36.9077	42.3385	36.1684	37.4391	36.9581	44.8061	28.3886	29.21	33.0574	28.3565	29.8781	29.3804	46.6956	35.9337	37.1968	43.3835	35.6871	37.1872	37.1872	53.8494	40.7044	39.3826	45.8973	38.9761	39.7075	39.7075
52.3235	32.9946	33.6496	38.2874	30.4598	32.8321	32.1821	47.4687	31.2959	36.1258	41.4658	34.0249	35.2246	35.2247	49.3255	29.3556	31.1409	36.9371	31.2096	31.5506	31.5506	47.191	39.6159	36.3706	41.8888	35.5059	36.7927	36.3284	45.6358	30.3332	28.7726	32.8306	27.7961	29.3455	28.8521	47.5604	35.4661	36.5663	42.7476	34.9416	36.4399	36.4399	54.8466	42.8957	38.8444	45.337	38.3126	39.0678	39.0678
53.2749	35.7661	33.072	37.6017	29.9424	32.1998	31.5926	48.3318	32.1169	35.4563	40.7047	33.2958	34.4907	34.4908	50.2224	30.3754	30.6113	36.3948	30.5359	30.9124	30.9124	48.049	38.6506	35.8268	41.3828	34.8489	36.142	35.6966	46.4656	31.6831	28.3279	32.5496	27.2415	28.8053	28.3199	48.4251	35.202	35.9291	42.0493	34.2076	35.6935	35.6935	55.8438	40.7904	38.3008	44.7283	37.6547	38.4277	38.4277
54.2262	36.4771	32.4915	36.8855	29.4363	31.5723	31.0091	49.1949	29.8543	34.7823	39.8957	32.5799	33.762	33.7621	51.1192	29.4455	30.0762	35.7976	29.867	30.274	30.274	48.907	33.9295	35.2768	40.8229	34.1982	35.4883	35.0638	47.2953	30.1762	27.8765	32.2161	26.6937	28.2591	27.785	49.2898	35.7084	35.2861	41.292	33.4857	34.9493	34.9493	56.841	38.1703	37.7522	44.0734	37.003	37.7879	37.7879
55.1776	33.3024	31.9086	36.1411	28.9413	30.95	30.4318	50.0579	27.7929	34.1048	39.0421	31.8774	33.0392	33.0393	52.016	27.0273	29.5362	35.1484	29.2041	29.6364	29.6364	49.765	30.1958	34.7212	40.2112	33.5546	34.8329	34.431	48.125	27.8044	27.4189	31.8317	26.1534	27.7084	27.2487	50.1546	35.6404	34.6379	40.4793	32.7763	34.2085	34.2085	57.8383	38.056	37.1989	43.3744	36.3581	37.1492	37.1492
56.1289	27.6835	31.3239	35.3705	28.4571	30.3334	29.861	50.921	27.9844	33.4243	38.1476	31.1885	32.323	32.3231	52.9128	27.7812	28.9919	34.4504	28.5481	29.0009	29.0009	50.623	29.9975	34.1605	39.5504	32.9186	34.1769	33.7991	48.9548	26.6908	26.9556	31.3983	25.621	27.1548	26.7121	51.0193	33.059	33.9853	39.615	32.0799	33.472	33.472	58.8355	39.7563	36.6415	42.6339	35.7205	36.5122	36.5122
57.0802	28.5261	30.7378	34.5763	27.9836	29.723	29.2969	51.7841	27.8624	32.7416	37.2158	30.5133	31.6141	31.6141	53.8097	30.0394	28.4439	33.707	27.9	28.3683	28.3683	51.4811	30.483	33.5952	38.8432	32.291	33.5213	33.169	49.7845	25.3943	26.4872	30.918	25.0971	26.5993	26.176	51.884	30.4418	33.329	38.7031	31.3966	32.7407	32.7407	59.8327	36.5909	36.0804	41.8544	35.0906	35.8777	35.8777
58.0316	28.4781	30.1508	33.7607	27.5205	29.1191	28.7396	52.6472	29.0466	32.0575	36.2506	29.852	30.913	30.913	54.7065	29.7182	27.8927	32.9218	27.2606	27.7396	27.7396	52.3391	27.8175	33.0258	38.0925	31.672	32.8671	32.5415	50.6143	25.332	26.0143	30.3931	24.582	26.0433	25.6414	52.7488	31.1166	32.6697	37.7479	30.7267	32.0155	32.0155	60.8299	34.2991	35.516	41.0384	34.4687	35.2462	35.2462
58.9829	28.5147	29.5635	32.9261	27.0676	28.5219	28.1893	53.5102	29.1589	31.3725	35.2556	29.2045	30.2202	30.2202	55.6033	26.5778	27.3391	32.0985	26.6304	27.1155	27.1155	53.1971	25.8933	32.453	37.3014	31.0621	32.2152	31.9171	51.444	21.6013	25.5373	29.8263	24.076	25.4878	25.1091	53.6135	33.0123	32.008	36.7536	30.0703	31.297	31.297	61.8271	34.7013	34.9488	40.1887	33.8553	34.6183	34.6183
59.9342	26.6735	28.9761	32.075	26.6246	27.9318	27.6462	54.3733	29.7969	30.6874	34.2348	28.5708	29.5361	29.5361	56.5001	24.427	26.7835	31.2408	26.01	26.4967	26.4967	54.0551	27.3287	31.8771	36.4729	30.4616	31.5664	31.2966	52.2737	20.6152	25.0568	29.2201	23.5794	24.9337	24.5799	54.4782	33.3396	31.3446	35.7245	29.4273	30.5861	30.5861	62.8243	35.2089	34.3791	39.3081	33.2505	33.9944	33.9944
60.8856	28.687	28.3893	31.2096	26.1913	27.349	27.1104	55.2364	30.2503	30.0028	33.1921	27.9508	28.8611	28.8611	57.397	26.2464	26.2265	30.3528	25.3999	25.884	25.884	54.9131	29.7262	31.2988	35.6103	29.8708	30.9213	30.6806	53.1035	21.5467	24.5734	28.5774	23.0922	24.3819	24.0543	55.343	30.5746	30.6803	34.6651	28.7979	29.8831	29.8831	63.8215	36.6407	33.8074	38.3993	32.6545	33.3751	33.3751
61.8369	29.872	27.8034	30.3324	25.7675	26.7738	26.5819	56.0994	30.1018	29.3194	32.1312	27.3445	28.1956	28.1956	58.2938	26.8331	25.6687	29.4382	24.8005	25.2778	25.2778	55.7712	29.163	30.7184	34.717	29.2897	30.2808	30.0695	53.9332	22.8588	24.0875	27.9013	22.6147	23.8333	23.5329	56.2077	29.66	30.0156	33.5799	28.1819	29.1888	29.1888	64.8187	33.1034	33.234	37.4653	32.0676	32.7606	32.7606
62.7883	29.0926	27.2189	29.4456	25.3529	26.2063	26.0609	56.9625	31.3356	28.6377	31.0561	26.7518	27.5398	27.5398	59.1906	26.6713	25.1106	28.5011	24.212	24.6787	24.6787	56.6292	28.7852	30.1367	33.7963	28.7187	29.6453	29.4638	54.763	23.6194	23.5998	27.1947	22.1468	23.2885	23.0163	57.0724	31.7521	29.3512	32.4732	27.5793	28.5034	28.5034	65.816	29.7129	32.6595	36.5089	31.4898	32.1515	32.1515
63.7396	25.7942	26.6363	28.5516	24.9473	25.6468	25.5474	57.8256	29.3074	27.9584	29.9704	26.1724	26.8941	26.8941	60.0875	25.1422	24.5528	27.5454	23.6346	24.0872	24.0872	57.4872	29.2265	29.5539	32.8516	28.1577	29.0154	28.864	55.5927	23.9257	23.1106	26.4609	21.6885	22.7482	22.5049	57.9372	32.2907	28.6877	31.3496	26.99	27.8275	27.8275	66.8132	30.7838	32.0842	35.533	30.9213	31.5479	31.5479
64.6909	24.567	26.0558	27.6527	24.5506	25.0953	25.0415	58.6886	29.8414	27.2821	28.8778	25.6062	26.2585	26.2585	60.9843	27.4233	23.9958	26.5751	23.0686	23.5036	23.5036	58.3452	30.3321	28.9707	31.8863	27.6068	28.3916	28.2704	56.4225	24.484	22.6205	25.703	21.2399	22.213	21.9992	58.8019	29.9137	28.0258	30.2133	26.4139	27.1613	27.1613	67.8104	32.8577	31.5084	34.5406	30.362	30.9503	30.9503
65.6423	26.6749	25.478	26.751	24.1624	24.552	24.5432	59.5517	30.8452	26.6093	27.782	25.0531	25.6333	25.6332	61.8811	27.7824	23.4401	25.5939	22.514	22.9282	22.9282	59.2032	31.365	28.3874	30.9038	27.0662	27.7743	27.6834	57.2522	25.1871	22.13	24.9242	20.8008	21.6834	21.4994	59.6666	26.8004	27.3659	29.0686	25.8508	26.5052	26.5052	68.8076	32.6535	30.9327	33.5345	29.8122	30.3589	30.3589
66.5936	28.5836	24.9032	25.8487	23.7826	24.0169	24.0526	60.4148	31.6746	25.9406	26.6863	24.5127	25.0185	25.0185	62.7779	26.8172	22.8862	24.6057	21.971	22.3615	22.3615	60.0612	29.8135	27.8046	29.9075	26.5357	27.164	27.1032	58.0819	25.4011	21.6395	24.1279	20.3713	21.1599	21.006	60.5314	27.371	26.7088	27.9196	25.3006	25.8594	25.8594	69.8048	30.3257	30.3573	32.5175	29.2717	29.774	29.774
67.5449	25.7282	24.3318	24.9479	23.4109	23.4902	23.5695	61.2778	29.1078	25.2765	25.5941	23.985	24.4145	24.4144	63.6748	23.984	22.3347	23.6142	21.4395	21.8035	21.8035	60.9193	28.5316	27.2227	28.9007	26.0154	26.5611	26.5302	58.9117	24.4607	21.1496	23.3171	19.9513	20.6429	20.5193	61.3961	26.8459	26.0549	26.7705	24.7629	25.2241	25.2241	70.802	32.3389	29.7827	31.4925	28.7406	29.1958	29.1958
68.4963	25.685	23.7642	24.0506	23.0472	22.9719	23.0942	62.1409	28.2718	24.6176	24.5085	23.4696	23.8211	23.821	64.5716	23.3378	21.7859	22.6229	20.9196	21.2547	21.2547	61.7773	28.5156	26.6422	27.8867	25.5051	25.9657	25.9646	59.7414	26.0262	20.6607	22.4953	19.5405	20.1328	20.0394	62.2609	24.3951	25.4048	25.6249	24.2377	24.5996	24.5996	71.7992	34.8837	29.2091	30.4621	28.2189	28.6244	28.6244
69.4476	28.0595	23.2007	23.1587	22.6913	22.4622	22.6264	63.004	29.0777	23.9644	23.4327	22.9664	23.2384	23.2384	65.4684	24.1268	21.2403	21.6351	20.4111	20.7151	20.7151	62.6353	30.167	26.0635	26.8687	25.005	25.3783	25.4066	60.5712	28.7119	20.1733	21.6654	19.139	19.6299	19.5665	63.1256	21.9925	24.7591	24.4866	23.7248	23.9859	23.9859	72.7964	36.0237	28.6371	29.4292	27.7065	28.0601	28.0601
70.399	27.6764	22.6417	22.274	22.3429	21.9609	22.1663	63.867	27.631	23.3172	22.3693	22.4752	22.6666	22.6666	66.3652	22.9172	20.6984	20.6542	19.9142	20.1849	20.1849	63.4933	30.0509	25.4871	25.8498	24.5148	24.799	24.8563	61.4009	29.3164	19.6877	20.8305	18.7466	19.1345	19.101	63.9903	23.5375	24.1181	23.359	23.2238	23.3833	23.3833	73.7936	34.6178	28.0668	28.3962	27.2033	27.503	27.503
71.3503	23.6459	22.0874	21.3982	22.0018	21.4681	21.7138	64.7301	23.6583	22.6766	21.3211	21.9955	22.1056	22.1056	67.2621	21.9027	20.1605	19.6832	19.4286	19.6643	19.6643	64.3513	25.631	24.9132	24.8329	24.0345	24.2281	24.314	62.2307	26.3719	19.2045	19.9937	18.3631	18.6469	18.6429	64.8551	26.5398	23.4825	22.2453	22.7346	22.7917	22.7917	74.7909	31.326	27.4987	27.3656	26.7094	26.9532	26.9532
72.3016	19.603	21.5383	20.5331	21.6679	20.9839	21.2689	65.5932	23.1166	22.0429	20.2905	21.5274	21.5555	21.5554	68.1589	22.8885	19.6272	18.7249	18.9544	19.1533	19.1533	65.2094	22.4832	24.3424	23.8209	23.564	23.6658	23.7797	63.0604	23.4746	18.7239	19.1578	17.9883	18.1671	18.1923	65.7198	27.0061	22.8526	21.1488	22.2569	22.2112	22.2112	75.7881	31.8567	26.9331	26.34	26.2245	26.4109	26.4109
73.253	21.7092	20.9945	19.6801	21.341	20.5082	20.8315	66.4562	24.7723	21.4167	19.2799	21.0704	21.0161	21.016	69.0557	24.2875	19.0987	17.782	18.4912	18.652	18.652	66.0674	21.1188	23.7751	22.8165	23.1032	23.1121	23.2536	63.8901	23.9936	18.2465	18.3256	17.6222	17.6956	17.7494	66.5845	26.4448	22.2289	20.072	21.7906	21.642	21.642	76.7853	29.4764	26.3703	25.3215	25.7488	25.8762	25.8761
74.2043	24.0775	20.4565	18.8406	21.0209	20.041	20.4016	67.3193	25.9051	20.7982	18.2911	20.6243	20.4875	20.4874	69.9526	23.0187	18.5755	16.857	18.0391	18.1605	18.1605	66.9254	22.7196	23.2115	21.8223	22.6519	22.5674	22.7358	64.7199	24.4092	17.7726	17.4997	17.2646	17.2323	17.3142	67.4493	25.1646	21.6119	19.0176	21.3353	21.0839	21.0839	77.7825	25.98	25.8106	24.3123	25.2819	25.349	25.349
75.1556	24.6099	19.9243	18.0161	20.7075	19.5823	19.9791	68.1824	24.4971	20.1878	17.3262	20.189	19.9696	19.9695	70.8494	20.7769	18.058	15.952	17.5979	17.6788	17.6788	67.7834	21.5309	22.6521	20.8407	22.2099	22.0316	22.2263	65.5496	21.9067	17.3025	16.6825	16.9152	16.7774	16.8868	68.314	23.1483	21.0019	17.9879	20.8908	20.537	20.537	78.7797	26.3566	25.2544	23.3146	24.8239	24.8296	24.8296
76.107	23.5938	19.3984	17.2076	20.4005	19.132	19.5641	69.0454	20.8658	19.586	16.3868	19.7641	19.4624	19.4622	71.7462	19.1636	17.5463	15.0691	17.1673	17.2068	17.2068	68.6414	20.2743	22.0973	19.874	21.7773	21.5048	21.7252	66.3794	20.5837	16.8366	15.8763	16.574	16.331	16.4673	69.1787	21.067	20.3993	16.985	20.4569	20.0012	20.0012	79.7769	27.6606	24.7018	22.3302	24.3747	24.318	24.318
77.0583	23.1706	18.879	16.4164	20.0998	18.6901	19.1563	69.9085	18.2405	18.9929	15.4742	19.3494	18.9657	18.9656	72.643	17.6746	17.0409	14.2102	16.7473	16.7447	16.7447	69.4994	22.3117	21.5472	18.9242	21.3537	20.9872	21.2325	67.2091	20.4836	16.3753	15.0834	16.2407	15.8932	16.0557	70.0435	18.923	19.8045	16.0108	20.0333	19.4766	19.4766	80.7741	28.9107	24.1533	21.3611	23.934	23.8141	23.8141
78.0097	23.5847	18.3662	15.6434	19.8053	18.2566	18.7559	70.7716	17.1061	18.4089	14.5899	18.9446	18.4795	18.4794	73.5399	16.6357	16.5421	13.3766	16.3377	16.2923	16.2923	70.3575	25.4242	21.0024	17.9933	20.9391	20.4787	20.7483	68.0388	18.8321	15.9189	14.3056	15.9152	15.464	15.6519	70.9082	18.3211	19.2178	15.0667	19.6199	18.963	18.963	81.7713	26.4636	23.6091	20.4088	23.5019	23.3181	23.3181
78.961	22.4689	17.8604	14.8896	19.5167	17.8314	18.3626	71.6346	17.9921	17.8343	13.7347	18.5496	18.0038	18.0037	74.4367	16.3735	16.0502	12.5699	15.9381	15.8496	15.8496	71.2155	26.1603	20.463	17.083	20.5334	19.9795	20.2726	68.8686	16.4125	15.4676	13.5448	15.5973	15.0435	15.2561	71.7729	19.2714	18.6395	14.1541	19.2163	18.4605	18.4605	82.7685	22.7363	23.0694	19.4749	23.0781	22.83	22.83
79.9123	17.1013	17.3617	14.1556	19.234	17.4145	17.9765	72.4977	18.3724	17.2693	12.9097	18.1641	17.5383	17.5382	75.3335	14.8935	15.5653	11.7911	15.5486	15.4166	15.4166	72.0735	25.234	19.9294	16.1949	20.1362	19.4895	19.8053	69.6983	15.1563	15.0218	12.8027	15.2869	14.6316	14.8681	72.6377	20.6731	18.07	13.2742	18.8223	17.9688	17.9688	83.7658	21.2608	22.5345	18.5608	22.6626	22.3496	22.3496
80.8637	15.6181	16.8702	13.4422	18.957	17.0056	17.5974	73.3608	18.0801	16.7142	12.1154	17.7879	17.0831	17.0829	76.2304	16.184	15.0878	11.0412	15.1689	14.9932	14.9932	72.9315	23.7605	19.4018	15.3304	19.7476	19.0087	19.3465	70.5281	11.5042	14.5817	12.0805	14.9837	14.2284	14.488	73.5024	18.6157	17.5094	12.4278	18.4378	17.488	17.488	84.763	21.2624	22.0047	17.6678	22.2552	21.8772	21.8772
81.815	14.6759	16.3862	12.75	18.6855	16.6049	17.2253	74.2238	18.3853	16.1691	11.3524	17.4207	16.6379	16.6377	77.1272	16.216	14.6179	10.3208	14.7987	14.5793	14.5793	73.7895	24.1151	18.8805	14.4906	19.3673	18.5371	18.8961	71.3578	10.2763	14.1476	11.3797	14.6876	13.8339	14.1157	74.3671	15.9738	16.9581	11.6155	18.0624	17.0179	17.0179	85.7602	20.2572	21.4801	16.797	21.8558	21.4126	21.4126
82.7663	14.3811	15.9099	12.0793	18.4194	16.2122	16.8601	75.0869	18.8244	15.6343	10.6209	17.0623	16.2026	16.2025	78.024	15.1472	14.1558	9.63045	14.4379	14.1749	14.1749	74.6475	23.9744	18.3658	13.6768	18.9952	18.0747	18.4541	72.1876	8.59426	13.7197	10.7013	14.3984	13.448	13.7512	75.2319	14.7603	16.4162	10.8378	17.6959	16.5584	16.5584	86.7574	17.5894	20.9611	15.9494	21.4642	20.9558	20.9558
83.7177	15.0563	15.4413	11.4307	18.1586	15.8273	16.5017	75.95	17.5425	15.1098	9.92115	16.7125	15.7772	15.777	78.9208	13.2518	13.7017	8.97055	14.0862	13.7798	13.7798	75.5056	22.802	17.8579	12.8896	18.631	17.6214	18.0204	73.0173	7.90308	13.2983	10.0461	14.116	13.0707	13.3944	76.0966	14.2779	15.884	10.095	17.3382	16.1094	16.1094	87.7546	16.8858	20.4477	15.1259	21.0803	20.5068	20.5068
84.669	14.389	14.9807	10.8044	17.903	15.4504	16.1501	76.8131	15.8171	14.596	9.25315	16.371	15.3615	15.3613	79.8177	12.2961	13.2557	8.34119	13.7436	13.394	13.394	76.3636	19.8158	17.357	12.1298	18.2748	17.1773	17.5951	73.847	7.17345	12.8835	9.41502	13.8402	12.7019	13.0453	76.9613	14.4985	15.3617	9.38712	16.989	15.6707	15.6707	88.7518	18.58	19.9402	14.3273	20.7041	20.0655	20.0655
85.6203	13.6424	14.528	10.2006	17.6523	15.0811	15.8051	77.6761	13.4185	14.0928	8.61675	16.0378	14.9553	14.9551	80.7145	10.334	12.8181	7.74239	13.4097	13.0172	13.0172	77.2216	19.7325	16.8633	11.3981	17.9262	16.7422	17.178	74.6768	8.08866	12.4756	8.80852	13.5708	12.3415	12.7037	77.8261	14.4838	14.8494	8.71398	16.648	15.2423	15.2423	89.749	20.6773	19.4388	13.5541	20.3353	19.632	19.632
86.5717	13.9917	14.0835	9.61932	17.4066	14.7195	15.4667	78.5392	11.6226	13.6004	8.01169	15.7124	14.5585	14.5583	81.6113	8.64351	12.3889	7.17396	13.0844	12.6495	12.6495	78.0796	20.5122	16.3769	10.6947	17.5851	16.3161	16.7691	75.5065	9.41209	12.0746	8.22705	13.3077	11.9896	12.3697	78.6908	13.7905	14.3473	8.07535	16.3152	14.8239	14.8239	90.7462	20.5445	18.9437	12.8068	19.9738	19.2062	19.2062
87.523	13.3382	13.6473	9.06066	17.1656	14.3654	15.1348	79.4023	10.6072	13.1189	7.43757	15.3948	14.171	14.1708	82.5081	6.63182	11.9684	6.63561	12.7674	12.2907	12.2907	78.9376	17.8259	15.8982	10.0199	17.2514	15.8989	16.3684	76.3363	9.93729	11.6809	7.67087	13.0508	11.6459	12.0431	79.5555	14.609	13.8555	7.47078	15.9902	14.4155	14.4155	91.7434	18.0468	18.455	12.0857	19.6195	18.788	18.788
88.4744	11.7329	13.2193	8.52456	16.9293	14.0188	14.8093	80.2653	10.0922	12.6483	6.89389	15.0848	13.7926	13.7924	83.405	6.14615	11.5565	6.12688	12.4587	11.9406	11.9406	79.7957	13.7867	15.4272	9.37394	16.925	15.4905	15.9756	77.166	10.0523	11.2945	7.1401	12.7998	11.3105	11.7238	80.4203	14.3472	13.3742	6.8997	15.6729	14.0169	14.0169	92.7407	15.4944	17.973	11.3912	19.2722	18.3773	18.3773
89.4257	9.1259	12.7998	8.01087	16.6975	13.6795	14.4901	81.1284	9.91101	12.1888	6.38006	14.7821	13.4232	13.423	84.3018	5.75967	11.1534	5.64723	12.1579	11.5992	11.5992	80.6537	10.9875	14.9641	8.7567	16.6056	15.0909	15.5909	77.9957	9.1416	10.9155	6.63473	12.5546	10.9831	11.4118	81.285	13.3332	12.9034	6.36143	15.3631	13.628	13.628	93.7379	12.7306	17.4976	10.7234	18.9318	17.9742	17.9742
90.377	7.13735	12.3887	7.51942	16.4701	13.3475	14.1771	81.9915	9.31772	11.7403	5.89537	14.4866	13.0625	13.0624	85.1986	5.56834	10.7591	5.196	11.8648	11.2663	11.2663	81.5117	8.57209	14.509	8.16806	16.2931	14.6999	15.214	78.8255	7.9904	10.5441	6.15462	12.3151	10.6638	11.1069	82.1497	10.9157	12.4431	5.85516	15.0605	13.2485	13.2485	94.7351	11.676	17.0292	10.0823	18.5982	17.5785	17.5785
91.3284	6.09214	11.9861	7.04994	16.247	13.0226	13.8702	82.8545	8.03375	11.3029	5.43906	14.1981	12.7106	12.7104	86.0955	4.91359	10.3738	4.77244	11.5794	10.9417	10.9417	82.3697	6.84969	14.062	7.60777	15.9873	14.3175	14.8449	79.6552	7.04239	10.1804	5.69952	12.0811	10.3524	10.8091	83.0145	9.00404	11.9935	5.38001	14.7651	12.8783	12.8783	95.7323	10.8541	16.5677	9.46776	18.2713	17.1901	17.1901
92.2797	5.37171	11.592	6.6021	16.0282	12.7047	13.5694	83.7176	7.13571	10.8765	5.01029	13.9164	12.3671	12.367	86.9923	4.78348	9.99748	4.37571	11.3014	10.6253	10.6253	83.2277	5.91862	13.6232	7.07549	15.6882	13.9435	14.4835	80.485	5.94698	9.82441	5.26908	11.8525	10.0487	10.5182	83.8792	6.8399	11.5546	4.935	14.4766	12.5173	12.5173	96.7295	10.3041	16.1134	8.87975	17.9509	16.8091	16.8091
93.231	4.95658	11.2064	6.17554	15.8135	12.3937	13.2745	84.5807	6.0765	10.4611	4.60817	13.6412	12.0321	12.0319	87.8891	4.36761	9.63014	4.00492	11.0305	10.317	10.317	84.0857	5.79539	13.1929	6.57077	15.3955	13.5779	14.1297	81.3147	5.51631	9.47625	4.86285	11.6291	9.75274	10.2342	84.7439	5.61431	11.1265	4.5191	14.1948	12.1653	12.1653	97.7267	8.86376	15.6662	8.31799	17.6368	16.4353	16.4353
94.1824	4.10314	10.8295	5.76984	15.6028	12.0895	12.9854	85.4437	4.49374	10.0568	4.23176	13.3726	11.7052	11.705	88.7859	4.31843	9.27182	3.65912	10.7667	10.0167	10.0167	84.9438	5.31987	12.7709	6.09307	15.1091	13.2206	13.7834	82.1445	4.17509	9.13596	4.48028	11.4109	9.4643	9.95697	85.6087	4.89898	10.709	4.13119	13.9195	11.8222	11.8222	98.7239	6.11116	15.2264	7.78216	17.3291	16.0687	16.0687

[truncated: 2 more sheets: WAT-548, WAT-117]
